# Supplementary material for: Dual mechanisms of opioid-induced respiratory depression in the inspiratory rhythm-generating network
Source: eLife. 2021 Aug 17;10:e67523. doi: 10.7554/eLife.67523 (PMC8390004; doi:10.7554/eLife.67523)
Supplement: Figure 1—source data 1. [file elife-67523-fig1-data1.xlsx]

## Sheet: C
	DATA						STATISTICS
	Probability Neuron is Oprm1+
	Pre-Inspiratory	Inspiratory	Expiratory	Tonic	Total		Firing pattern	replicates (neurons recroded)	ANOVA summary
	1	1	1	1	1		Pre-Inspiratory	n=60	F	0.3312
	1	1	1	1	1		Inspiratory	n=69	P value	0.8028
	1	1	1	1	1		Expiratory	n=27	P value summary	ns
	1	1	1	1	1		Tonic	n=67	Significant diff. among means (P < 0.05)?	No
	1	1	1	1	1				R squared	0.004516
	1	1	1	1	1
	1	1	1	1	1
	1	1	1	1	1
	1	1	1	1	1
	1	1	1	1	1
	1	1	1	1	1
	1	1	1	1	1
	1	1	1	1	1
	1	1	1	1	1
	1	1	0	1	1
	1	1	0	1	1
	1	1	0	1	1
	1	1	0	1	1
	1	1	0	1	1
	1	1	0	1	1
	1	1	0	1	1
	1	1	0	1	1
	1	1	0	1	1
	1	1	0	1	1
	1	1	0	1	1
	1	1	0	1	1
	1	1	0	1	1
	1	1		1	1
	1	1		1	1
	1	1		1	1
	0	0		1	0
	0	0		1	0
	0	0		1	0
	0	0		1	0
	0	0		0	0
	0	0		0	0
	0	0		0	0
	0	0		0	0
	0	0		0	0
	0	0		0	0
	0	0		0	0
	0	0		0	0
	0	0		0	0
	0	0		0	0
	0	0		0	0
	0	0		0	0
	0	0		0	0
	0	0		0	0
	0	0		0	0
	0	0		0	0
	0	0		0	0
	0	0		0	0
	0	0		0	0
	0	0		0	0
	0	0		0	0
	0	0		0	0
	0	0		0	0
	0	0		0	0
	0	0		0	0
	0	0		0	0
		0		0	1
		0		0	1
		0		0	1
		0		0	1
		0		0	1
		0		0	1
		0		0	1
		0			1
		0			1
					1
					1
					1
					1
					1
					1
					1
					1
					1
					1
					1
					1
					1
					1
					1
					1
					1
					1
					1
					1
					1
					0
					0
					0
					0
					0
					0
					0
					0
					0
					0
					0
					0
					0
					0
					0
					0
					0
					0
					0
					0
					0
					0
					0
					0
					0
					0
					0
					0
					0
					0
					0
					0
					0
					0
					0
					0
					0
					0
					0
					1
					1
					1
					1
					1
					1
					1
					1
					1
					1
					1
					1
					1
					1
					0
					0
					0
					0
					0
					0
					0
					0
					0
					0
					0
					0
					0
					1
					1
					1
					1
					1
					1
					1
					1
					1
					1
					1
					1
					1
					1
					1
					1
					1
					1
					1
					1
					1
					1
					1
					1
					1
					1
					1
					1
					1
					1
					1
					1
					1
					1
					0
					0
					0
					0
					0
					0
					0
					0
					0
					0
					0
					0
					0
					0
					0
					0
					0
					0
					0
					0
					0
					0
					0
					0
					0
					0
					0
					0
					0
					0
					0
					0
					0

## Sheet: D
	DATA
	Neuron Locations: X=mm lateral from midline, Y=mm caudal from VII nerve
	Discharge Identity						Oprm1 expresion
	X	Y (pre-I)	Y (Insp)	Y (Exp)	Y (Tonic)		X	Y (Oprm1+)	Y (Oprm1-)
	1.05292		-1.69916				1.05292	-1.69916
	1.00279			-1.74373			1.00279		-1.74373
	1.06407		-1.78273				1.06407	-1.78273
	1.08078	-1.62117					1.08078		-1.62117
	1.13649		-1.68245				1.13649		-1.68245
	1.05292	-1.92201					1.05292	-1.92201
	1.08635		-1.92201				1.08635	-1.92201
	1.03621	-1.72145					1.03621	-1.72145
	1.08635	-1.81058					1.08635	-1.81058
	1.03621	-1.85515					1.03621	-1.85515
	1.01393				-1.82173		1.01393	-1.82173
	1.03064	-1.77159					1.03064	-1.77159
	0.986072		-1.83287				0.986072	-1.83287
	0.969359		-1.70474				0.969359	-1.70474
	1.10306		-1.78273				1.10306		-1.78273
	1.07521		-1.66017				1.07521		-1.66017
	1.11978		-1.68802				1.11978		-1.68802
	1.13092	-1.71588					1.13092	-1.71588
	1.04735		-1.74373				1.04735	-1.74373
	1.16992		-1.81616				1.16992	-1.81616
	1.18663		-1.86072				1.18663		-1.86072
	1.07521	-1.80501					1.07521	-1.80501
	0.997214		-1.79944				0.997214		-1.79944
	1.05292		-1.59889				1.05292		-1.59889
	1.05292		-1.94986				1.05292	-1.94986
	1.06407	-1.89972					1.06407	-1.89972
	1.04178	-1.84401					1.04178	-1.84401
	1.08078		-1.92201				1.08078		-1.92201
	1.16435	-1.89415					1.16435	-1.89415
	0.941504				-1.77159		0.941504		-1.77159
	0.930362	-1.80501					0.930362	-1.80501
	0.935933		-1.74373				0.935933	-1.74373
	1.10864		-1.63788				1.10864	-1.63788
	1.13092		-1.67131				1.13092	-1.67131
	1.10864		-1.70474				1.10864		-1.70474
	1.14763			-1.68245			1.14763		-1.68245
	0.835655		-1.76045				0.835655		-1.76045
	0.885794				-1.79387		0.885794	-1.79387
	0.902507			-1.83287			0.902507		-1.83287
	0.880223			-1.84958			0.880223		-1.84958
	1.03621	-1.59889					1.03621	-1.59889
	1.10306				-1.6156		1.10306		-1.6156
	0.986072			-1.69916			0.986072	-1.69916
	0.963788	-1.69916					0.963788		-1.69916
	1.01393	-1.82173					1.01393	-1.82173
	0.941504		-1.68245				0.941504		-1.68245
	1.02507				-1.78273		1.02507	-1.78273
	1.00836	-1.83844					1.00836		-1.83844
	1.07521				-1.74373		1.07521		-1.74373
	1.04178				-1.75487		1.04178		-1.75487
	0.891365			-1.83844			0.891365	-1.83844
	1.04735	-1.68245					1.04735		-1.68245
	0.997214		-1.69359				0.997214	-1.69359
	1.0195			-1.83844			1.0195		-1.83844
	1.11978		-1.66574				1.11978		-1.66574
	1.11978	-1.72145					1.11978		-1.72145
	1.06407		-1.93872				1.06407	-1.93872
	1.25348		-1.64903				1.25348	-1.64903
