# Supplementary material for: Dual mechanisms of opioid-induced respiratory depression in the inspiratory rhythm-generating network
Source: eLife. 2021 Aug 17;10:e67523. doi: 10.7554/eLife.67523 (PMC8390004; doi:10.7554/eLife.67523)
Supplement: Figure 2—source data 1. [file elife-67523-fig2-data1.xlsx]

## Sheet: C
	DATA						STATISTICS
	Pre-Inspiratory Neuron Mean IBI spiking (intrinsically tonic)						Two-Way RM ANOVA
	Oprm1+ (n=7)						Source of Variation	% of total variation	P value	P value summary	Significant?
	Baseline	50nM	100nM	200nM	300nM		Treatment Factor	17.4	<0.0001	****	Yes
	1	1.0713	1.03152	0.870411	0.952152		Group Factor	28.15	0.0029	**	Yes
	1	0.698229	0.841212	0.605364	0.682739
	1	0.629567	0.569699	0.543904	0.214758		Bonferroni's multiple comparisons tests Oprm1+ vs. Oprm1-
	1	0.780592	0.3047	0.285008	0.247857		Treatment	mean diff.	95.00% CI of diff.	Significant?	Summary	Adjusted P Value
	1	0.868699	0.769587	0.644861	0.611115		Baseline	0	-0.2992 to 0.2992	No	ns	>0.9999
	1	0.57513	0.144985	0.0856072	0.0963762		50nM	-0.2481	-0.5473 to 0.05114	No	ns	0.1568
	1	0.440755	0.487474	0.165756	0.0253808		100nM	-0.3653	-0.6645 to -0.06609	Yes	**	0.0094
							200nM	-0.4734	-0.7726 to -0.1742	Yes	***	0.0004
	Oprm1- (n=8)						300nM	-0.4889	-0.7881 to -0.1897	Yes	***	0.0003
	Baseline	50nM	100nM	200nM	300nM
	1	1.0721	1.21687	0.693531	0.641911
	1	0.91754	0.819705	0.817618	0.730838
	1	1.00947	0.981813	1.06694	1.04344
	1	0.922081	0.923808	0.893153	0.892009
	1	1.05193	0.937364	0.780232	0.522434
	1	0.904721	0.873497	0.920896	0.914278
	1	0.872762	0.87494	0.935891	0.903647
	1	1.02161	1.03623	1.33682	1.49731

## Sheet: D
	DATA (Intrinsically tonic pre-Inspiratory neuron spike frequency across IBI)
		Oprm1+ neurons (n=7)																	Oprm1- neurons (n=8)
		BASELINE								DAMGO (300nM)									BASELINE									DAMGO (300nM)
	X (normalized IBI)	Y (spike frequency nomralized to intrinsic spike rate)								Y (spike frequency nomralized to intrinsic spike rate)								X (normalized IBI)	Y (spike frequency nomralized to intrinsic spike rate)									Y (spike frequency nomralized to intrinsic spike rate)
	bin center	Replicate #1	Replicate #2	Replicate #3	Replicate #4	Replicate #5	Replicate #6	Replicate #7		Replicate #1	Replicate #2	Replicate #3	Replicate #4	Replicate #5	Replicate #6	Replicate #7		bin center	Replicate #1	Replicate #2	Replicate #3	Replicate #4	Replicate #5	Replicate #6	Replicate #7	Replicate #8		Replicate #1	Replicate #2	Replicate #3	Replicate #4	Replicate #5	Replicate #6	Replicate #7	Replicate #8
	0.0005	1.19697	0.346882	0.471187	0.645668	1.22377	0.62964	0.282757		0.544339	0.144646	0.127486	0.175851	0.611986	0.450766	0.029189		0.0005	0.225162	0.139009	0.864043	0.196969	0.297184	0.086385	0.212391	0.055968		0.091839	0.097295	0.869614	0.14614	0.130463	0.102087	0.132172	0.085011
	0.0015	1.19697	0.346882	0.471187	0.645668	1.23334	0.633759	0.282757		0.544339	0.144646	0.127486	0.175851	0.611986	0.446536	0.029189		0.0015	0.225162	0.139009	0.864043	0.196969	0.297184	0.086385	0.212391	0.055968		0.091839	0.097295	0.869614	0.14614	0.130463	0.102087	0.125231	0.085011
	0.0025	1.19697	0.346882	0.471187	0.645668	1.23334	0.633759	0.282757		0.544339	0.144646	0.127486	0.175851	0.611986	0.446536	0.029189		0.0025	0.225162	0.139009	0.864043	0.196969	0.297184	0.086385	0.212391	0.055968		0.091839	0.097295	0.869614	0.12184	0.130463	0.102087	0.125231	0.085011
	0.0035	1.19697	0.346882	0.471187	0.645668	1.23334	0.633759	0.282757		0.544339	0.144646	0.127486	0.161061	0.611986	0.446536	0.029189		0.0035	0.225162	0.139009	0.864043	0.196969	0.297184	0.086385	0.212391	0.055968		0.091839	0.097295	0.869614	0.12184	0.130463	0.102087	0.125231	0.085011
	0.0045	1.19697	0.346882	0.471187	0.645668	1.22562	0.633759	0.282757		0.544339	0.144646	0.127486	0.161061	0.612395	0.446536	0.029189		0.0045	0.225162	0.139009	0.864043	0.196969	0.297184	0.086385	0.212391	0.055968		0.091839	0.097295	0.869614	0.12184	0.130463	0.102087	0.125231	0.085011
	0.0055	1.19697	0.346882	0.471187	0.645668	1.24997	0.633759	0.282757		0.544339	0.144646	0.127486	0.161061	0.640824	0.446536	0.029189		0.0055	0.225162	0.139009	0.857267	0.196969	0.297184	0.086385	0.374494	0.055968		0.091839	0.097295	0.869614	0.12184	0.130463	0.102087	0.125231	0.085011
	0.0065	1.17687	0.346882	0.471187	0.645668	1.24997	0.633759	0.282757		0.544339	0.144646	0.127486	0.161061	0.697411	0.446536	0.029189		0.0065	0.225162	0.139009	0.857267	0.196969	0.297184	0.086385	0.374494	0.055968		0.091839	0.097295	0.869614	0.12184	0.130463	0.102087	0.125231	0.085011
	0.0075	1.17687	0.346882	0.471187	0.645668	1.24997	0.633759	0.282757		0.544339	0.144646	0.127486	0.161061	0.697411	0.446536	0.029189		0.0075	0.225162	0.139009	0.857267	0.196969	0.297184	0.086385	0.370595	0.055968		0.091839	0.249966	0.869614	0.12184	0.130463	0.102087	0.117847	0.085011
	0.0085	1.17687	0.346882	0.471187	0.645668	1.26532	0.633759	0.282757		0.544339	0.144646	0.127486	0.161061	0.697411	0.446536	0.029189		0.0085	0.225162	0.139009	0.857267	0.196969	0.297184	0.086385	0.370595	0.055968		0.091839	0.249966	0.869614	0.131288	0.130463	0.102087	0.111256	0.085011
	0.0095	1.07337	0.346882	0.471187	0.645668	1.26532	0.633759	0.282757		0.544339	0.144646	0.127486	0.161061	0.697411	0.445373	0.029189		0.0095	0.225162	0.139009	0.857267	0.196969	0.297184	0.086385	0.203585	0.055968		0.091839	0.249966	0.869614	0.131288	0.130463	0.102087	0.111256	0.085011
	0.0105	1.07337	0.346882	0.471187	0.645668	1.27879	0.633759	0.282757		0.544339	0.144646	0.127486	0.161061	0.730472	0.482623	0.029189		0.0105	0.225162	0.139009	0.857267	0.196969	0.297184	0.086385	0.203585	0.055968		0.091839	0.252668	0.869614	0.131288	0.130463	0.102087	0.111256	0.085011
	0.0115	1.07337	0.346882	0.471187	0.645668	1.27879	0.633759	0.282757		0.544339	0.144646	0.127486	0.161061	0.715451	0.482623	0.029189		0.0115	0.225162	0.139009	0.857267	0.196969	0.297184	0.086385	0.203585	0.055968		0.091839	0.252668	0.869614	0.131288	0.130463	0.102087	0.111256	0.085011
	0.0125	1.07337	0.346882	0.471187	0.645668	1.32404	0.633759	0.282757		0.544339	0.144646	0.127486	0.161061	0.715451	0.482623	0.029189		0.0125	0.225162	0.139009	0.857267	0.196969	0.297184	0.086385	0.203585	0.055968		0.091839	0.252668	0.869614	0.131288	0.130463	0.102087	0.111256	0.085011
	0.0135	1.11879	0.346882	0.471187	0.645668	1.34758	0.630666	0.282757		0.544339	0.144646	0.127486	0.161061	0.702952	0.521958	0.029189		0.0135	0.225162	0.139009	0.847933	0.196969	0.297184	0.086385	0.259841	0.055968		0.091839	0.252668	0.869614	0.149685	0.130463	0.102087	0.111256	0.085011
	0.0145	1.0802	0.346882	0.471187	0.645668	1.34758	0.626754	0.282757		0.544339	0.144646	0.127486	0.161061	0.725502	0.521958	0.029189		0.0145	0.225162	0.139009	0.847933	0.196969	0.297184	0.086385	0.255892	0.055968		0.091839	0.333729	0.869614	0.149685	0.130463	0.102087	0.111256	0.085011
	0.0155	1.0802	0.346882	0.471187	0.629513	1.33339	0.626754	0.282757		0.544339	0.144646	0.127486	0.161061	0.725502	0.521958	0.029189		0.0155	0.225162	0.139009	0.847933	0.196969	0.297184	0.086385	0.252335	0.055968		0.091839	0.333729	0.907883	0.149685	0.130463	0.102087	0.111256	0.085011
	0.0165	1.0802	0.346882	0.471187	0.640396	1.35054	0.626754	0.282757		0.544339	0.144646	0.127486	0.161061	0.725502	0.522484	0.029189		0.0165	0.225162	0.139009	0.847933	0.196969	0.297184	0.086385	0.252335	0.055968		0.091839	0.417491	0.907883	0.149685	0.130463	0.102087	0.13269	0.085011
	0.0175	1.0802	0.346882	0.471187	0.640396	1.46312	0.636154	0.282757		0.544339	0.144646	0.127486	0.161061	0.780573	0.522484	0.029189		0.0175	0.225162	0.139009	0.847933	0.196969	0.297184	0.086385	0.391296	0.055968		0.091839	0.417491	0.907883	0.139708	0.117337	0.102087	0.13269	0.085011
	0.0185	1.0802	0.346882	0.471187	0.640396	1.46312	0.636154	0.282757		0.544339	0.144646	0.127486	0.161061	0.819108	0.522484	0.029189		0.0185	0.225162	0.139009	0.827966	0.196969	0.297184	0.086385	0.391296	0.055968		0.091839	0.316976	0.92226	0.194133	0.117337	0.102087	0.13269	0.085011
	0.0195	1.0802	0.346882	0.471187	0.640396	1.46312	0.636154	0.282757		0.544339	0.144646	0.127486	0.161061	0.819108	0.518291	0.029189		0.0195	0.225162	0.139009	0.827966	0.196969	0.297184	0.086385	0.675516	0.055968		0.091839	0.316976	0.937582	0.194133	0.117337	0.102087	0.13269	0.085011
	0.0205	1.0802	0.346882	0.471187	0.640396	1.58046	0.636154	0.282757		0.544339	0.144646	0.127486	0.161061	0.819108	0.518291	0.029189		0.0205	0.225162	0.139009	0.827966	0.196969	0.297184	0.086385	0.675516	0.055968		0.091839	0.300051	0.937582	0.194133	0.117337	0.102087	0.13269	0.085011
	0.0215	1.0802	0.346882	0.471187	0.640396	1.58046	0.636154	0.282757		0.544339	0.144646	0.127486	0.161061	0.858954	0.440656	0.029189		0.0215	0.225162	0.139009	0.827966	0.196969	0.297184	0.086385	0.675516	0.055968		0.091839	0.300051	0.937582	0.194133	0.117337	0.102087	0.13269	0.085011
	0.0225	1.0802	0.346882	0.471187	0.640396	1.66852	0.636154	0.282757		0.544339	0.144646	0.127486	0.161061	0.854514	0.440656	0.029189		0.0225	0.225162	0.139009	0.827966	0.196969	0.297184	0.086385	0.935489	0.055968		0.091839	0.300051	0.89156	0.199087	0.117337	0.102087	0.13269	0.085011
	0.0235	1.0802	0.346882	0.471187	0.640396	1.66852	0.625894	0.282757		0.544339	0.144646	0.127486	0.161061	0.854514	0.466885	0.029189		0.0235	0.225162	0.139009	0.827966	0.196969	0.297184	0.086385	0.935489	0.055968		0.091839	0.24607	0.88451	0.222782	0.117337	0.102087	0.13269	0.085011
	0.0245	1.0802	0.346882	0.471187	0.640396	1.67562	0.625894	0.282757		0.573322	0.144646	0.127486	0.161061	0.841797	0.466885	0.029189		0.0245	0.225162	0.139009	0.82785	0.196969	0.297184	0.086385	0.870616	0.055968		0.091839	0.24607	0.902587	0.222782	0.117337	0.102087	0.13269	0.085011
	0.0255	1.0802	0.346882	0.471187	0.640396	1.34613	0.627083	0.282757		0.573322	0.144646	0.127486	0.161061	0.841797	0.466885	0.029189		0.0255	0.225162	0.139009	0.82785	0.196969	0.297184	0.086385	0.886883	0.055968		0.091839	0.24607	0.902587	0.222782	0.117337	0.102087	0.13269	0.085011
	0.0265	1.0802	0.346882	0.471187	0.640396	1.34613	0.627083	0.282757		0.573322	0.144646	0.127486	0.161061	0.841797	0.466885	0.029189		0.0265	0.225162	0.139009	0.82458	0.196969	0.297184	0.086385	0.886883	0.055968		0.091839	0.24607	0.902587	0.237772	0.117337	0.102087	0.13269	0.085011
	0.0275	1.0802	0.346882	0.471187	0.640396	1.37617	0.627083	0.26419		0.573322	0.144646	0.127486	0.161061	0.795582	0.483858	0.029189		0.0275	0.225162	0.139009	0.832395	0.196969	0.297184	0.086385	0.877325	0.055968		0.091839	0.087982	0.902587	0.206493	0.117337	0.102087	0.13269	0.085011
	0.0285	1.07822	0.346882	0.471187	0.640396	1.37617	0.61946	0.26419		0.561631	0.144646	0.127486	0.161061	0.795582	0.483858	0.029189		0.0285	0.225162	0.131828	0.832395	0.196969	0.297184	0.086385	0.733937	0.055968		0.091839	0.087982	0.902587	0.235671	0.117337	0.102087	0.13269	0.085011
	0.0295	1.07822	0.346882	0.471187	0.62532	1.39869	0.61946	0.26419		0.561631	0.144646	0.127486	0.144455	0.795582	0.485608	0.029189		0.0295	0.225162	0.131828	0.85855	0.196969	0.297184	0.086385	0.5858	0.055968		0.091839	0.087982	0.832882	0.330637	0.117337	0.102087	0.13269	0.085011
	0.0305	1.07822	0.346882	0.471187	0.62532	1.41719	0.61946	0.26419		0.771995	0.144646	0.127486	0.144455	0.874475	0.534456	0.029189		0.0305	0.225162	0.131828	0.85855	0.196969	0.297184	0.086385	0.5858	0.055968		0.091839	0.087982	0.832882	0.330637	0.117337	0.102087	0.13269	0.085011
	0.0315	1.07822	0.346882	0.471187	0.645535	1.42424	0.618022	0.26419		0.771995	0.144646	0.127486	0.144455	0.874475	0.585211	0.029189		0.0315	0.225162	0.131828	0.853686	0.196969	0.297184	0.086385	0.5858	0.055968		0.091839	0.087982	0.897285	0.330637	0.117337	0.102087	0.13269	0.101069
	0.0325	1.28663	0.346882	0.471187	0.645535	1.38758	0.638213	0.26419		0.771995	0.144646	0.127486	0.144455	0.874475	0.585211	0.029189		0.0325	0.225162	0.131828	0.853548	0.196969	0.297184	0.086385	0.71506	0.055968		0.091839	0.087982	0.897285	0.314181	0.117337	0.102087	0.13269	0.101069
	0.0335	1.28663	0.346882	0.471187	0.645535	1.46195	0.638213	0.26419		0.771995	0.144646	0.127486	0.144455	0.874475	0.585211	0.029189		0.0335	0.225162	0.131828	0.853548	0.196969	0.297184	0.086385	0.711376	0.055968		0.091839	0.087982	0.933046	0.314181	0.117337	0.102087	0.13269	0.101069
	0.0345	1.28663	0.346882	0.471187	0.645535	1.46195	0.638213	0.26419		0.771995	0.144646	0.127486	0.144455	0.874475	0.585211	0.029189		0.0345	0.225162	0.131828	0.850652	0.196969	0.297184	0.086385	0.711376	0.055968		0.091839	0.087982	0.939464	0.314181	0.117337	0.102087	0.13269	0.101069
	0.0355	1.28663	0.346882	0.471187	0.645535	1.50446	0.638213	0.26419		0.771995	0.144646	0.127486	0.144455	0.868306	0.585211	0.029189		0.0355	0.225162	0.131828	0.853115	0.196969	0.297184	0.086385	0.374005	0.055968		0.091839	0.087982	0.913332	0.320458	0.117337	0.102087	0.13269	0.101069
	0.0365	1.378	0.346882	0.471187	0.645535	1.55219	0.63453	0.26419		0.771995	0.144646	0.127486	0.144455	0.878359	0.606513	0.029189		0.0365	0.225162	0.131828	0.853115	0.196969	0.297184	0.086385	0.374005	0.055968		0.091839	0.087982	0.90391	0.314209	0.117337	0.102087	0.13269	0.101069
	0.0375	1.378	0.346882	0.471187	0.645535	1.55219	0.63453	0.26419		0.771995	0.144646	0.127486	0.144455	0.8862	0.606513	0.029189		0.0375	0.225162	0.131828	0.853115	0.196969	0.297184	0.086385	0.374005	0.055968		0.091839	0.087982	0.90391	0.314209	0.117337	0.102087	0.13269	0.101069
	0.0385	1.44408	0.346882	0.471187	0.645535	1.55219	0.630785	0.26419		0.771995	0.144646	0.127486	0.144455	0.8862	0.606513	0.029189		0.0385	0.225162	0.131828	0.851971	0.196969	0.297184	0.086385	0.475028	0.055968		0.091839	0.087982	0.923097	0.309561	0.117337	0.102087	0.13269	0.101069
	0.0395	1.44408	0.346882	0.471187	0.645535	1.57006	0.648166	0.26419		0.734081	0.144646	0.127486	0.144455	0.8862	0.538958	0.029189		0.0395	0.225162	0.131828	0.857426	0.196969	0.297184	0.086385	0.475028	0.055968		0.091839	0.087982	0.923097	0.309561	0.117337	0.102087	0.13269	0.101069
	0.0405	1.35366	0.346882	0.471187	0.612746	1.61133	0.659941	0.26419		0.734081	0.144646	0.127486	0.144455	0.8862	0.539685	0.029189		0.0405	0.225162	0.131828	0.846456	0.196969	0.297184	0.086385	0.253609	0.055968		0.091839	0.087982	0.923097	0.380557	0.117337	0.102087	0.13269	0.101069
	0.0415	1.27502	0.346882	0.471187	0.612746	1.55413	0.659941	0.26419		0.836978	0.144646	0.127486	0.144455	0.935146	0.633223	0.029189		0.0415	0.225162	0.131828	0.846456	0.196969	0.297184	0.086385	0.253609	0.055968		0.091839	0.087982	0.932295	0.386486	0.117337	0.102087	0.13269	0.101069
	0.0425	1.27502	0.346882	0.471187	0.612746	1.55345	0.659941	0.26419		0.836978	0.144646	0.127486	0.144455	0.970872	0.633223	0.029189		0.0425	0.225162	0.131828	0.856746	0.196969	0.297184	0.086385	0.253609	0.055968		0.091839	0.087982	0.932295	0.386486	0.117337	0.102087	0.13269	0.101069
	0.0435	1.27502	0.346882	0.471187	0.612746	1.55345	0.674103	0.26419		1.0655	0.254308	0.127486	0.144455	0.970872	0.633223	0.029189		0.0435	0.225162	0.131828	0.856746	0.196969	0.297184	0.086385	0.253609	0.055968		0.091839	0.087982	0.932295	0.360545	0.117337	0.102087	0.13269	0.101069
	0.0445	1.27502	0.346882	0.471187	0.612746	1.55345	0.661183	0.26419		1.0655	0.254308	0.127486	0.14453	1.08264	0.594502	0.029189		0.0445	0.225162	0.131828	0.884245	0.196969	0.297184	0.086385	0.443266	0.055968		0.091839	0.087982	0.898372	0.360545	0.117337	0.102087	0.13269	0.101069
	0.0455	1.27502	0.346882	0.471187	0.612746	1.55354	0.65644	0.26419		1.0655	0.254308	0.127486	0.14453	1.08183	0.594502	0.029189		0.0455	0.225162	0.131828	0.857168	0.196969	0.297184	0.086385	0.443266	0.055968		0.091839	0.087982	0.867044	0.360545	0.117337	0.238591	0.13269	0.101069
	0.0465	1.27502	0.346882	0.471187	0.612746	1.53188	0.650081	0.26419		1.0655	0.254308	0.127486	0.14453	1.08183	0.594502	0.029189		0.0465	0.225162	0.131828	0.813104	0.196969	0.297184	0.086385	0.443266	0.055968		0.091839	0.087982	0.867044	0.507078	0.117337	0.238591	0.13269	0.101069
	0.0475	1.27502	0.346882	0.471187	0.612746	1.51487	0.650081	0.26419		1.0655	0.254308	0.127486	0.14453	1.1042	0.452158	0.029189		0.0475	0.225162	0.131828	0.807059	0.196969	0.297184	0.086385	0.544136	0.055968		0.091839	0.087982	0.929371	0.553887	0.117337	0.238591	0.13269	0.101069
	0.0485	1.29515	0.346882	0.471187	0.612746	1.48365	0.650081	0.26419		1.0655	0.254308	0.127486	0.14453	1.10217	0.441801	0.029189		0.0485	0.225162	0.131828	0.798043	0.196969	0.297184	0.086385	0.540932	0.055968		0.091839	0.087982	0.931108	0.553887	0.117337	0.112542	0.13269	0.101069
	0.0495	1.29515	0.346882	0.471187	0.647103	1.48365	0.650256	0.26419		1.0655	0.254308	0.127486	0.14453	1.10217	0.441801	0.029189		0.0495	0.225162	0.131828	0.798043	0.196969	0.297184	0.086385	0.540932	0.055968		0.106026	0.087982	0.907878	0.755031	0.117337	0.112542	0.13269	0.101069
	0.0505	1.29515	0.346882	0.471187	0.640865	1.46141	0.653488	0.26419		0.934317	0.254308	0.127486	0.14453	1.02974	0.441801	0.029189		0.0505	0.225162	0.131828	0.755236	0.196969	0.297184	0.086385	0.540932	0.055968		0.106026	0.087982	0.887651	0.759415	0.117337	0.112542	0.13269	0.11496
	0.0515	1.26273	0.346882	0.471187	0.640865	1.46141	0.653488	0.26419		0.855404	0.213434	0.127486	0.14453	1.02606	0.441801	0.029189		0.0515	0.225162	0.131828	0.755236	0.196969	0.297184	0.086385	0.41399	0.055968		0.106026	0.087982	0.854497	0.619063	0.117337	0.112542	0.13269	0.11496
	0.0525	1.33801	0.346882	0.471187	0.659729	1.46141	0.653488	0.26419		0.855404	0.213434	0.127486	0.14453	1.02606	0.441801	0.029189		0.0525	0.225162	0.131828	0.755236	0.196969	0.297184	0.086385	0.41399	0.055968		0.106026	0.087982	0.854497	0.636201	0.117337	0.112542	0.13269	0.11496
	0.0535	1.45006	0.346882	0.471187	0.659729	1.44079	0.654747	0.26419		0.943217	0.213434	0.127486	0.14453	1.02606	0.441801	0.029189		0.0535	0.225162	0.131828	0.755236	0.196969	0.297184	0.086385	0.30879	0.055968		0.106026	0.087982	0.934088	0.636201	0.117337	0.112542	0.13269	0.11496
	0.0545	1.45006	0.346882	0.471187	0.659729	1.48793	0.681957	0.26419		0.943217	0.213434	0.127486	0.14453	0.957772	0.441801	0.029189		0.0545	0.225162	0.131828	0.755236	0.196969	0.297184	0.086385	0.30879	0.055968		0.106026	0.087982	0.934088	0.809687	0.117337	0.112542	0.13269	0.11496
	0.0555	1.42117	0.346882	0.471187	0.659729	1.56359	0.681957	0.26419		0.943217	0.213434	0.127486	0.14453	0.959414	0.441801	0.029189		0.0555	0.225162	0.131828	0.73157	0.196969	0.297184	0.086385	0.30879	0.055968		0.106026	0.087982	0.877093	0.671561	0.117337	0.112542	0.11724	0.138254
	0.0565	1.40641	0.346882	0.471187	0.669824	1.56631	0.68169	0.26419		0.943217	0.213434	0.127486	0.14453	0.959414	0.501283	0.029189		0.0565	0.225162	0.131828	0.694102	0.196969	0.297184	0.086385	0.30879	0.055968		0.106026	0.087982	0.87234	0.631821	0.117337	0.112542	0.11724	0.158545
	0.0575	1.35758	0.346882	0.471187	0.682805	1.56631	0.691679	0.26419		0.943217	0.213434	0.127486	0.14453	0.942544	0.516171	0.029189		0.0575	0.225162	0.131828	0.693318	0.196969	0.297184	0.086385	0.306486	0.055968		0.106026	0.087982	0.87234	0.631821	0.117337	0.112542	0.11724	0.158545
	0.0585	1.35758	0.428585	0.471187	0.682805	1.46999	0.691679	0.26419		0.943217	0.213434	0.127486	0.14453	0.915549	0.516171	0.029189		0.0585	0.225162	0.131828	0.693318	0.196969	0.297184	0.086385	0.306486	0.055968		0.106026	0.087982	0.831018	0.820092	0.117337	0.112542	0.11724	0.158545
	0.0595	1.35758	0.428585	0.471187	0.682805	1.46331	0.667041	0.26419		0.943217	0.213434	0.127486	0.141618	0.909629	0.525174	0.029189		0.0595	0.225162	0.131828	0.672364	0.196969	0.297184	0.086385	0.306486	0.055968		0.106026	0.087982	0.870842	0.38993	0.117337	0.112542	0.11724	0.158545
	0.0605	1.23084	0.428585	0.471187	0.682805	1.52635	0.667041	0.26419		0.943217	0.213434	0.127486	0.141618	0.909629	0.525174	0.029189		0.0605	0.225162	0.131828	0.672364	0.196969	0.297184	0.086385	0.303265	0.055968		0.106026	0.087982	0.870842	0.38993	0.117337	0.112542	0.11724	0.158545
	0.0615	1.23084	0.428585	0.471187	0.682805	1.43624	0.651389	0.26419		0.968895	0.213434	0.127486	0.141618	0.909629	0.525174	0.029189		0.0615	0.225162	0.131828	0.672364	0.196969	0.297184	0.086385	0.303265	0.055968		0.106026	0.087982	0.870842	0.279612	0.117337	0.112542	0.11724	0.158545
	0.0625	1.23084	0.428585	0.471187	0.682805	1.50149	0.651389	0.26419		0.968895	0.213434	0.127486	0.141618	0.90482	0.525174	0.029189		0.0625	0.30037	0.131828	0.672364	0.196969	0.297184	0.086385	0.303265	0.055968		0.106026	0.087982	0.890536	0.279612	0.117337	0.112542	0.11724	0.158545
	0.0635	1.23084	0.428585	0.471187	0.682805	1.50149	0.669283	0.26419		0.968895	0.213434	0.127486	0.141618	0.90482	0.567047	0.029189		0.0635	0.30037	0.131828	0.672364	0.196969	0.297184	0.086385	0.303265	0.055968		0.106026	0.087982	0.829804	0.279612	0.117337	0.112542	0.11724	0.157151
	0.0645	1.23084	0.428585	0.471187	0.682805	1.50149	0.669283	0.26419		0.940241	0.223814	0.387601	0.141618	0.887114	0.567047	0.029189		0.0645	0.30037	0.131828	0.665567	0.196969	0.297184	0.086385	0.197725	0.055968		0.106026	0.087982	0.809986	0.290596	0.117337	0.112542	0.11724	0.157151
	0.0655	1.23084	0.428585	0.471187	0.682805	1.50149	0.669283	0.26419		0.940241	0.223814	0.387601	0.141618	0.894026	0.544607	0.029189		0.0655	0.30037	0.131828	0.665567	0.196969	0.286421	0.086385	0.197725	0.055968		0.106026	0.087982	0.783537	0.290596	0.117337	0.112542	0.11724	0.157151
	0.0665	1.23084	0.428585	0.471187	0.682805	1.48373	0.66037	0.26419		0.940241	0.223814	0.387601	0.141618	0.927378	0.544607	0.029189		0.0665	0.30037	0.131828	0.665567	0.196969	0.286421	0.086385	0.197725	0.055968		0.106026	0.087982	0.777999	0.295939	0.117337	0.112542	0.11724	0.157151
	0.0675	1.23084	0.428585	0.471187	0.682805	1.48373	0.656037	0.26419		0.930156	0.223814	0.387601	0.141618	0.927378	0.496215	0.029189		0.0675	0.30037	0.131828	0.665567	0.196969	0.286421	0.086385	0.197725	0.055968		0.106026	0.087982	0.791711	0.295939	0.117337	0.112542	0.11724	0.157151
	0.0685	1.23388	0.428585	0.471187	0.682805	1.58756	0.66702	0.251725		0.930156	0.223814	0.387601	0.141618	0.935071	0.449789	0.029189		0.0685	0.30037	0.131828	0.699	0.196969	0.286421	0.086385	0.197725	0.055968		0.106026	0.087982	0.838203	0.295939	0.117337	0.110377	0.11724	0.157151
	0.0695	1.15177	0.428585	0.471187	0.696537	1.65537	0.660236	0.251725		0.81209	0.223814	0.387601	0.141618	0.935071	0.434303	0.029189		0.0695	0.30037	0.19161	0.699	0.196969	0.286421	0.086385	0.197725	0.055968		0.106026	0.087982	0.838203	0.295939	0.117337	0.101603	0.11724	0.157151
	0.0705	1.22649	0.428585	0.471187	0.696537	1.61437	0.675873	0.251725		0.820652	0.223814	0.387601	0.141618	0.930624	0.434303	0.029189		0.0705	0.30037	0.19161	0.696098	0.196969	0.286421	0.086385	0.197725	0.055968		0.106026	0.087982	0.838203	0.321528	0.117337	0.112134	0.11724	0.157151
	0.0715	1.22649	0.428585	0.471187	0.696537	1.57006	0.675873	0.251725		0.820652	0.223814	0.387601	0.141618	0.930624	0.446367	0.029189		0.0715	0.30037	0.19161	0.696098	0.196969	0.389103	0.086385	0.197725	0.055968		0.106026	0.087982	0.808654	0.322291	0.117337	0.127899	0.11724	0.174571
	0.0725	1.22649	0.428585	0.471187	0.696537	1.57006	0.665254	0.251725		0.820652	0.223814	0.387601	0.141618	0.930624	0.446367	0.029189		0.0725	0.30037	0.19161	0.696098	0.196969	0.389103	0.086385	0.197725	0.055968		0.106026	0.087982	0.801716	0.303555	0.117337	0.127899	0.11724	0.174571
	0.0735	1.20259	0.428585	0.471187	0.696537	1.68562	0.665254	0.251725		0.820652	0.223814	0.387601	0.141618	0.90721	0.446367	0.029189		0.0735	0.30037	0.19161	0.670521	0.196969	0.389103	0.086385	0.130139	0.055968		0.106026	0.136687	0.801716	0.303128	0.117337	0.127899	0.11724	0.174571
	0.0745	1.20259	0.428585	0.471187	0.696537	1.68562	0.665254	0.251725		0.820652	0.129342	0.387601	0.141618	0.90721	0.446367	0.029189		0.0745	0.30037	0.19161	0.649889	0.196969	0.389103	0.086385	0.130139	0.055968		0.121922	0.136687	0.838077	0.303128	0.117337	0.127899	0.11724	0.174571
	0.0755	1.20259	0.428585	0.471187	0.691599	1.70112	0.665254	0.251725		0.820652	0.129342	0.189622	0.141618	0.941074	0.446367	0.029189		0.0755	0.30037	0.235628	0.662961	0.196969	0.389103	0.086385	0.130139	0.055968		0.121922	0.136687	0.838077	0.303128	0.117337	0.127899	0.11724	0.180863
	0.0765	1.23835	0.428585	0.471187	0.691599	1.65308	0.665254	0.251725		0.820652	0.129342	0.189622	0.141618	0.941527	0.454683	0.029189		0.0765	0.30037	0.235628	0.662961	0.196969	0.389103	0.086385	0.130139	0.055968		0.121922	0.136687	0.851048	0.297159	0.117337	0.127899	0.11724	0.203488
	0.0775	1.21783	0.428585	0.471187	0.693448	1.65308	0.665254	0.251725		1.01693	0.129342	0.189622	0.141618	0.941527	0.454683	0.029189		0.0775	0.30037	0.288817	0.662961	0.196969	0.389103	0.086385	0.130139	0.055968		0.121922	0.136687	0.982478	0.297159	0.117337	0.127899	0.11724	0.203488
	0.0785	1.21783	0.428585	0.471187	0.693448	1.44879	0.665254	0.251725		1.01693	0.13719	0.189622	0.141618	0.991253	0.454683	0.029189		0.0785	0.30037	0.288817	0.662961	0.196969	0.389103	0.086385	0.130139	0.055968		0.121922	0.136687	0.984829	0.30466	0.117337	0.127899	0.11724	0.203488
	0.0795	1.15519	0.428585	0.471187	0.693448	1.44879	0.665254	0.251725		1.01693	0.13719	0.189622	0.141618	1.00195	0.438208	0.029189		0.0795	0.30037	0.288817	0.662961	0.196969	0.389103	0.086385	0.130139	0.055968		0.128506	0.187455	0.984829	0.30466	0.117337	0.127899	0.11724	0.203488
	0.0805	1.15519	0.428585	0.471187	0.693448	1.45855	0.684207	0.251725		1.01693	0.13719	0.189622	0.141618	1.00195	0.478519	0.029189		0.0805	0.30037	0.288817	0.662961	0.196969	0.389103	0.086385	0.130139	0.055968		0.163677	0.187455	0.984829	0.368174	0.117337	0.162521	0.11724	0.203488
	0.0815	1.09276	0.428585	0.471187	0.693448	1.45893	0.696825	0.251725		1.02167	0.13719	0.189622	0.141618	0.992477	0.481596	0.029189		0.0815	0.30037	0.258658	0.662961	0.196969	0.389103	0.086385	0.130139	0.055968		0.163677	0.187455	0.869868	0.368174	0.117337	0.162521	0.11724	0.260714
	0.0825	1.09276	0.428585	0.471187	0.693448	1.45893	0.696825	0.241826		1.02167	0.13719	0.189622	0.141618	0.986235	0.481596	0.029189		0.0825	0.30037	0.269489	0.662961	0.196969	0.389103	0.086385	0.130139	0.055968		0.163677	0.187455	0.907926	0.3985	0.117337	0.162521	0.11724	0.255166
	0.0835	1.09276	0.428585	0.471187	0.693448	1.51475	0.696825	0.241826		0.976491	0.13719	0.189622	0.141618	0.986235	0.481596	0.029189		0.0835	0.30037	0.269489	0.662961	0.196969	0.389103	0.086385	0.130139	0.055968		0.163677	0.196254	0.933983	0.390765	0.117337	0.162521	0.11724	0.255166
	0.0845	1.09276	0.385513	0.471187	0.693448	1.51475	0.690058	0.241826		0.976491	0.126142	0.189622	0.141618	0.942391	0.481596	0.029189		0.0845	0.30037	0.269489	0.627733	0.196969	0.389103	0.086385	0.130139	0.055968		0.163677	0.196254	0.933983	0.390765	0.117337	0.181322	0.11724	0.255166
	0.0855	1.09276	0.385513	0.471187	0.693448	1.49216	0.731461	0.241826		0.976491	0.126142	0.189622	0.141618	0.9641	0.481596	0.029189		0.0855	0.30037	0.269489	0.672269	0.196969	0.389103	0.086385	0.130139	0.055968		0.163677	0.196254	0.955946	0.360441	0.117337	0.192257	0.11724	0.249413
	0.0865	1.09276	0.385513	0.471187	0.693448	1.59282	0.734781	0.241826		0.976491	0.126142	0.189622	0.141618	0.9641	0.507377	0.029189		0.0865	0.30037	0.288893	0.663743	0.196969	0.389103	0.086385	0.130139	0.055968		0.163677	0.216116	0.973071	0.360441	0.117337	0.192257	0.165866	0.249413
	0.0875	1.09276	0.385513	0.471187	0.685463	1.60073	0.74974	0.241826		0.976491	0.126142	0.189622	0.141618	0.9641	0.507377	0.029189		0.0875	0.30037	0.208907	0.643454	0.196969	0.401802	0.086385	0.130139	0.055968		0.163677	0.216116	0.944245	0.360441	0.117337	0.192257	0.165866	0.249413
	0.0885	1.1203	0.385513	0.471187	0.685463	1.60982	0.763557	0.241826		0.976491	0.126142	0.189622	0.141618	0.9641	0.507377	0.029189		0.0885	0.30037	0.208907	0.643454	0.196969	0.401802	0.086385	0.130139	0.055968		0.163677	0.216116	0.944245	0.322332	0.117337	0.192257	0.165866	0.249413
	0.0895	1.05424	0.385513	0.471187	0.685463	1.60982	0.763557	0.241826		0.943621	0.126142	0.189622	0.141618	0.936262	0.616889	0.029189		0.0895	0.30037	0.208907	0.643454	0.196969	0.401802	0.086385	0.130139	0.055968		0.163677	0.188618	0.871163	0.322332	0.117337	0.192257	0.165866	0.249413
	0.0905	1.05424	0.385513	0.471187	0.685463	1.99238	0.759697	0.241826		0.943621	0.126142	0.189622	0.141618	0.936262	0.616889	0.029189		0.0905	0.30037	0.208907	0.66636	0.204582	0.401802	0.086385	0.130139	0.055968		0.163677	0.188618	0.823687	0.347225	0.117337	0.192257	0.165866	0.256593
	0.0915	1.05424	0.385513	0.471187	0.685463	1.97286	0.746249	0.241826		0.943621	0.126142	0.189622	0.141618	0.966042	0.616889	0.029189		0.0915	0.30037	0.231557	0.672028	0.204582	0.401802	0.086385	0.130139	0.055968		0.186258	0.188618	0.847623	0.340286	0.117337	0.192257	0.165866	0.256593
	0.0925	1.05424	0.385513	0.471187	0.685463	1.84454	0.78196	0.241826		0.943621	0.126142	0.189622	0.141618	0.966042	0.671163	0.029189		0.0925	0.30037	0.231557	0.678573	0.204582	0.401802	0.086385	0.130139	0.055968		0.186258	0.188618	0.847623	0.38022	0.117337	0.201236	0.165866	0.256593
	0.0935	1.05318	0.385513	0.471187	0.685463	1.50147	0.78196	0.241826		0.943621	0.126142	0.189622	0.141618	0.966042	0.679579	0.029189		0.0935	0.30037	0.231557	0.678573	0.204582	0.401802	0.086385	0.130139	0.055968		0.186258	0.188618	0.847623	0.399629	0.100192	0.201236	0.165866	0.256593
	0.0945	1.05318	0.385513	0.471187	0.712226	1.50147	0.776151	0.241826		0.943621	0.126142	0.189622	0.141618	0.961549	0.679579	0.029189		0.0945	0.275162	0.231557	0.678573	0.204582	0.401802	0.086385	0.130139	0.055968		0.186258	0.188618	0.847623	0.439409	0.100192	0.177684	0.165866	0.318194
	0.0955	1.05318	0.385513	0.471187	0.712226	1.50147	0.776151	0.241826		0.966824	0.126142	0.189622	0.141618	0.961549	0.677748	0.029189		0.0955	0.275162	0.231557	0.678573	0.204582	0.401802	0.086385	0.130139	0.055968		0.227191	0.188618	0.823687	0.439409	0.100192	0.177684	0.165866	0.318194
	0.0965	1.05318	0.385513	0.471187	0.732217	1.44773	0.7789	0.241826		0.966824	0.126142	0.189622	0.141618	0.961549	0.677748	0.029189		0.0965	0.275162	0.231557	0.678573	0.204582	0.401802	0.086385	0.130139	0.055968		0.227191	0.155836	0.779953	0.3623	0.100192	0.177684	0.165866	0.318194
	0.0975	1.05447	0.385513	0.471187	0.732217	1.44773	0.781385	0.241826		0.966824	0.126142	0.189622	0.141618	0.899688	0.677748	0.029189		0.0975	0.275162	0.231557	0.700629	0.161259	0.401802	0.086385	0.130139	0.055968		0.227191	0.155836	0.779953	0.3623	0.100192	0.178941	0.165866	0.318194
	0.0985	1.05447	0.385513	0.471187	0.732217	1.52134	0.761495	0.241826		1.05835	0.126142	0.189622	0.141618	0.899688	0.677748	0.029189		0.0985	0.275162	0.231557	0.700629	0.161259	0.401802	0.086385	0.130139	0.055968		0.227191	0.155836	0.766912	0.3623	0.100192	0.178941	0.165866	0.318194
	0.0995	1.05447	0.385513	0.471187	0.738537	1.44	0.761495	0.241826		1.05835	0.126142	0.189622	0.141618	0.914269	0.621171	0.029189		0.0995	0.275162	0.231557	0.723639	0.15903	0.401802	0.086385	0.130139	0.055968		0.227191	0.155836	0.776792	0.376127	0.309451	0.156667	0.165866	0.318194
	0.1005	1.05447	0.385513	0.471187	0.707691	1.44	0.761495	0.241826		1.05835	0.126142	0.189622	0.141618	0.909974	0.5654	0.029189		0.1005	0.275162	0.231557	0.75206	0.15903	0.32611	0.086385	0.130139	0.055968		0.224734	0.155836	0.773464	0.403752	0.309451	0.156667	0.165866	0.318194
	0.1015	1.05447	0.385513	0.471187	0.707691	1.43043	0.735157	0.241826		1.15486	0.126142	0.189622	0.141618	0.932585	0.5654	0.029189		0.1015	0.275162	0.231557	0.75206	0.15903	0.32611	0.086385	0.130139	0.055968		0.224734	0.155836	0.822304	0.397398	0.309451	0.156667	0.165866	0.295148
	0.1025	1.1192	0.385513	0.471187	0.716124	1.4343	0.740452	0.241826		1.15486	0.181434	0.189622	0.141618	0.932585	0.5654	0.029189		0.1025	0.275162	0.231557	0.765619	0.15903	0.32611	0.086385	0.130139	0.055968		0.224734	0.155836	0.822304	0.397398	0.159344	0.156667	0.210711	0.295148
	0.1035	1.1192	0.385513	0.471187	0.70576	1.4343	0.692997	0.241826		1.1292	0.181434	0.189622	0.141618	0.932585	0.5654	0.029189		0.1035	0.275162	0.241306	0.754866	0.15903	0.405768	0.086385	0.130139	0.055968		0.224734	0.155836	0.822304	0.397398	0.159344	0.156667	0.210711	0.308679
	0.1045	1.1192	0.432077	0.471187	0.70576	1.39068	0.692997	0.241826		1.1292	0.181434	0.189622	0.141618	0.920827	0.5654	0.029189		0.1045	0.275162	0.241306	0.773853	0.15903	0.405768	0.086385	0.130139	0.055968		0.267022	0.155836	0.842548	0.395659	0.159344	0.156667	0.210711	0.315229
	0.1055	1.1192	0.432077	0.471187	0.70576	1.40298	0.692997	0.241826		1.24182	0.181434	0.138438	0.141618	0.915633	0.5654	0.029189		0.1055	0.275162	0.241306	0.773853	0.15903	0.405768	0.086385	0.130139	0.055968		0.267022	0.155836	0.905262	0.395659	0.159344	0.156667	0.210711	0.313103
	0.1065	1.1192	0.432077	0.471187	0.70576	1.40298	0.692997	0.241826		1.24182	0.181434	0.138438	0.141618	0.915633	0.59434	0.029189		0.1065	0.275162	0.241306	0.713301	0.15903	0.405768	0.086385	0.130139	0.055968		0.267022	0.155836	0.905262	0.447307	0.159344	0.156667	0.210711	0.313103
	0.1075	1.08191	0.432077	0.471187	0.70576	1.49961	0.692997	0.241826		1.14112	0.181434	0.138438	0.141618	0.928694	0.557892	0.029189		0.1075	0.275162	0.241306	0.708765	0.15903	0.405768	0.086385	0.130139	0.055968		0.267022	0.155836	0.905262	0.445302	0.159344	0.156667	0.210711	0.313103
	0.1085	1.08191	0.432077	0.471187	0.70576	1.65738	0.7024	0.241826		1.14112	0.181434	0.138438	0.141618	0.928694	0.575422	0.029189		0.1085	0.275162	0.241306	0.761588	0.15903	0.506756	0.086385	0.130139	0.055968		0.267022	0.155836	0.905262	0.584154	0.159344	0.156667	0.205482	0.313103
	0.1095	1.13669	0.432077	0.471187	0.70576	1.65738	0.7024	0.241826		1.14112	0.181434	0.138438	0.141618	0.951308	0.617024	0.029189		0.1095	0.275162	0.241306	0.761588	0.15903	0.506756	0.086385	0.130139	0.055968		0.267022	0.155747	0.863125	0.584154	0.159344	0.156667	0.205482	0.313103
	0.1105	1.13669	0.432077	0.471187	0.70576	1.90464	0.7024	0.241826		1.14112	0.181434	0.138438	0.141618	0.951308	0.599055	0.029189		0.1105	0.275162	0.243947	0.761588	0.165948	0.506756	0.086385	0.130139	0.055968		0.267022	0.155747	0.863125	0.639523	0.159344	0.156667	0.216354	0.313103
	0.1115	1.12673	0.432077	0.471187	0.70576	1.91762	0.7024	0.241826		1.14112	0.181434	0.138438	0.141618	0.930707	0.599055	0.029189		0.1115	0.275162	0.307858	0.761588	0.165948	0.506756	0.086385	0.130139	0.055968		0.267022	0.155747	0.853495	0.600174	0.159344	0.189399	0.13186	0.314048
	0.1125	1.12673	0.432077	0.471187	0.70576	1.91444	0.7024	0.241826		1.12387	0.181434	0.138438	0.141618	0.899738	0.553625	0.029189		0.1125	0.275162	0.307858	0.761588	0.178967	0.506756	0.086385	0.130139	0.055968		0.267022	0.121999	0.828324	0.496904	0.159344	0.189399	0.13186	0.315888
	0.1135	1.18248	0.432077	0.471187	0.70576	1.91444	0.7024	0.241826		1.12387	0.181434	0.138438	0.141618	0.908712	0.553625	0.029189		0.1135	0.275162	0.307858	0.750137	0.178967	0.506756	0.086385	0.130139	0.084301		0.253988	0.121999	0.807895	0.455499	0.159344	0.189399	0.155105	0.312845
	0.1145	1.14368	0.432077	0.471187	0.70576	1.74977	0.711967	0.241826		1.04897	0.181434	0.138438	0.141618	0.908712	0.553625	0.029189		0.1145	0.275162	0.349234	0.750137	0.178967	0.506756	0.086385	0.130139	0.084301		0.261426	0.121999	0.842732	0.410175	0.145621	0.189399	0.166916	0.312845
	0.1155	1.14368	0.432077	0.471187	0.699704	1.76624	0.711967	0.241826		1.0076	0.209041	0.138438	0.141618	0.908712	0.579385	0.029189		0.1155	0.275162	0.343874	0.750137	0.178967	0.663155	0.086385	0.130139	0.084301		0.261426	0.121999	0.842732	0.410175	0.145621	0.228485	0.166916	0.312845
	0.1165	1.14368	0.432077	0.471187	0.699704	1.76624	0.711967	0.241826		1.0076	0.209041	0.138438	0.141618	0.910521	0.579385	0.029189		0.1165	0.275162	0.343874	0.734255	0.178967	0.663155	0.086385	0.130139	0.084301		0.2588	0.121999	0.842732	0.410175	0.145621	0.228485	0.166916	0.312845
	0.1175	1.05592	0.543473	0.471187	0.699704	1.89377	0.710165	0.241826		1.0076	0.209041	0.138438	0.141618	0.910521	0.579385	0.029189		0.1175	0.275162	0.36369	0.734606	0.178967	0.663155	0.086385	0.130139	0.084301		0.2588	0.121999	0.998333	0.515777	0.145621	0.228485	0.188194	0.354159
	0.1185	1.03884	0.543473	0.471187	0.699704	1.76026	0.710165	0.241826		1.0076	0.209041	0.138438	0.141618	0.910521	0.579385	0.029189		0.1185	0.275162	0.36369	0.734606	0.178967	0.663155	0.086385	0.130139	0.084301		0.2588	0.121999	0.998333	0.515777	0.145621	0.205276	0.188194	0.354159
	0.1195	1.03884	0.543473	0.471187	0.699704	1.71031	0.710165	0.241826		1.02458	0.209041	0.138438	0.141618	0.995286	0.583928	0.029189		0.1195	0.275162	0.36369	0.734606	0.178967	0.746534	0.086385	0.130139	0.084301		0.2588	0.121999	0.998333	0.449271	0.145621	0.205276	0.188194	0.354159
	0.1205	1.0672	0.543473	0.471187	0.688185	1.71934	0.723042	0.241826		1.17517	0.209041	0.138438	0.141618	0.998848	0.590931	0.029189		0.1205	0.275162	0.36369	0.734606	0.178967	0.746534	0.086385	0.130139	0.084301		0.2588	0.121999	0.883145	0.45869	0.145621	0.205276	0.188194	0.354159
	0.1215	1.03009	0.53146	0.471187	0.688185	1.72987	0.723042	0.241826		1.17517	0.209041	0.138438	0.141618	1.00742	0.574499	0.029189		0.1215	0.275162	0.36369	0.734606	0.178967	0.748006	0.086385	0.130139	0.093367		0.24985	0.121999	0.883145	0.411595	0.145621	0.205276	0.188194	0.365714
	0.1225	1.03009	0.53146	0.471187	0.688185	1.72987	0.729233	0.227293		1.17517	0.209041	0.138438	0.141618	1.00742	0.574499	0.029189		0.1225	0.275162	0.36369	0.715648	0.178967	0.748006	0.086385	0.130139	0.093233		0.24985	0.121999	0.925643	0.391917	0.145621	0.205276	0.188194	0.375748
	0.1235	1.03009	0.53146	0.471187	0.688185	1.72987	0.729233	0.227293		1.17517	0.209041	0.138438	0.141618	1.04554	0.574499	0.029189		0.1235	0.275162	0.36369	0.750856	0.178967	0.767865	0.086385	0.130139	0.093233		0.24985	0.121999	0.925643	0.42019	0.145621	0.224926	0.188194	0.375748
	0.1245	1.03009	0.53146	0.471187	0.688185	1.75471	0.729233	0.227293		1.15073	0.209041	0.138438	0.141618	1.0488	0.623075	0.029189		0.1245	0.275162	0.36369	0.750856	0.178967	0.814162	0.086385	0.130139	0.093233		0.24985	0.14004	0.925141	0.42019	0.145621	0.224926	0.188194	0.369415
	0.1255	1.03009	0.53146	0.471187	0.688185	1.75471	0.726318	0.227293		1.15073	0.147781	0.138438	0.141618	1.05102	0.578839	0.029189		0.1255	0.275162	0.36369	0.736379	0.178967	0.73589	0.086385	0.130139	0.093233		0.24985	0.14004	0.925141	0.435783	0.145621	0.264711	0.227251	0.369415
	0.1265	1.03009	0.53146	0.508505	0.688185	1.71784	0.742394	0.227293		1.14738	0.147781	0.138438	0.145192	1.07193	0.595765	0.029189		0.1265	0.275162	0.36369	0.732657	0.178967	0.73589	0.086385	0.130139	0.093233		0.24985	0.152773	0.871739	0.488842	0.145621	0.264711	0.227251	0.369415
	0.1275	1.03009	0.53146	0.508505	0.688185	1.71784	0.744563	0.227293		1.14738	0.147781	0.138438	0.145192	1.07193	0.595765	0.029189		0.1275	0.275162	0.330858	0.732657	0.178967	0.743518	0.086385	0.130139	0.093233		0.27841	0.161117	0.852654	0.505777	0.145621	0.264711	0.28284	0.379523
	0.1285	1.03009	0.53146	0.508505	0.688185	1.69536	0.741888	0.227293		1.14738	0.147781	0.138438	0.145192	1.07193	0.595765	0.029189		0.1285	0.275162	0.330858	0.73669	0.178967	0.743518	0.086385	0.130139	0.093233		0.246081	0.146503	0.852654	0.449435	0.145621	0.264711	0.28284	0.379523
	0.1295	0.936275	0.53146	0.508505	0.688185	1.70344	0.741888	0.227293		1.14738	0.147781	0.138438	0.150202	1.0818	0.595765	0.029189		0.1295	0.275162	0.249826	0.73776	0.178967	0.743518	0.086385	0.130139	0.093233		0.246081	0.146503	0.872987	0.406293	0.294018	0.264711	0.316544	0.378685
	0.1305	0.936275	0.53146	0.508505	0.68633	1.69226	0.745403	0.227293		1.14738	0.147781	0.138438	0.150202	1.04345	0.603497	0.029189		0.1305	0.275162	0.302336	0.766941	0.178967	0.743518	0.086385	0.130139	0.093233		0.246081	0.145368	0.80388	0.406293	0.294018	0.264711	0.316544	0.424363
	0.1315	0.988695	0.53146	0.508505	0.68633	1.55629	0.745403	0.227293		1.14738	0.147781	0.138438	0.150202	1.2019	0.603497	0.029189		0.1315	0.275162	0.333903	0.757534	0.182838	0.743518	0.086385	0.130139	0.069867		0.246081	0.154444	0.80388	0.453775	0.294018	0.284722	0.316544	0.424363
	0.1325	0.988695	0.53146	0.508505	0.67985	1.55629	0.737121	0.227293		1.28639	0.147781	0.138438	0.150202	1.16447	0.603497	0.029189		0.1325	0.275162	0.343563	0.757534	0.198075	0.743518	0.086385	0.130139	0.069867		0.245979	0.154444	0.80388	0.412083	0.294018	0.284722	0.316544	0.448909
	0.1335	0.992504	0.53146	0.508505	0.67985	1.54835	0.741446	0.227293		1.17024	0.147781	0.138438	0.150202	1.14231	0.603497	0.029189		0.1335	0.275162	0.343563	0.757534	0.198075	0.743518	0.086385	0.130139	0.069867		0.245979	0.166078	0.817972	0.412083	0.104692	0.29926	0.356598	0.448909
	0.1345	0.992504	0.53146	0.508505	0.686143	1.54835	0.741446	0.227293		1.06754	0.147781	0.138438	0.149606	0.898843	0.584184	0.029189		0.1345	0.275162	0.343563	0.776339	0.198075	0.742246	0.086385	0.130139	0.069867		0.245979	0.1777	0.856548	0.419321	0.104692	0.277703	0.356598	0.438271
	0.1355	0.992504	0.521168	0.508505	0.686143	1.52328	0.741446	0.227293		1.06754	0.147781	0.138438	0.149606	0.898843	0.468594	0.029189		0.1355	0.275162	0.343563	0.776339	0.198075	0.742246	0.086385	0.130139	0.069867		0.245979	0.1777	0.903939	0.425369	0.104692	0.277703	0.356598	0.438271
	0.1365	0.992504	0.406292	0.508505	0.686143	1.52328	0.774699	0.227293		1.06754	0.136159	0.138438	0.149606	0.910718	0.41321	0.029189		0.1365	0.275162	0.343563	0.783214	0.198075	0.556174	0.086385	0.130139	0.069867		0.245979	0.1777	0.903939	0.425369	0.104692	0.27032	0.356598	0.446222
	0.1375	0.992504	0.406292	0.508505	0.686143	1.53676	0.774699	0.227293		0.963398	0.136159	0.138438	0.149606	0.903454	0.41321	0.029189		0.1375	0.275162	0.343563	0.783214	0.198075	0.556174	0.086385	0.130139	0.069867		0.245979	0.1777	0.903939	0.453369	0.104692	0.275963	0.356598	0.464034
	0.1385	0.992504	0.521733	0.508505	0.686143	1.61439	0.774699	0.227293		0.963398	0.136159	0.138438	0.149606	0.903454	0.419073	0.029189		0.1385	0.284988	0.376742	0.783214	0.198075	0.556174	0.086385	0.130139	0.069867		0.245979	0.1777	0.903939	0.453369	0.104692	0.247085	0.380346	0.506021
	0.1395	0.992504	0.521733	0.508505	0.686143	1.61439	0.774699	0.227293		0.963398	0.136159	0.138438	0.149606	0.903454	0.419073	0.029189		0.1395	0.284988	0.480893	0.781125	0.198075	0.556174	0.086385	0.130139	0.069867		0.245979	0.1777	0.886835	0.402693	0.114187	0.272701	0.380346	0.503137
	0.1405	0.992504	0.521733	0.508505	0.686143	1.61439	0.758977	0.227293		0.963398	0.136159	0.138438	0.149606	0.880329	0.39254	0.029189		0.1405	0.284988	0.440196	0.781125	0.198075	0.556174	0.086385	0.130139	0.069867		0.245979	0.1777	0.886835	0.399178	0.114187	0.298742	0.380346	0.503137
	0.1415	0.992504	0.521733	0.508505	0.674366	1.71669	0.739418	0.227293		0.963398	0.136159	0.138438	0.149606	0.88928	0.402293	0.029189		0.1415	0.284988	0.459636	0.781125	0.198075	0.556174	0.086385	0.130139	0.069867		0.245979	0.1777	0.845929	0.399178	0.114187	0.317833	0.339224	0.516032
	0.1425	0.992504	0.521733	0.508505	0.674366	1.80028	0.739418	0.227293		0.885445	0.136159	0.138438	0.149606	0.88928	0.402293	0.029189		0.1425	0.284988	0.459636	0.754638	0.198075	0.556174	0.097517	0.130139	0.069867		0.245979	0.1777	0.845929	0.379722	0.114187	0.317833	0.348531	0.516032
	0.1435	0.992504	0.521733	0.508505	0.674366	1.81235	0.739418	0.227293		1.11264	0.136159	0.138438	0.149606	0.974001	0.369537	0.029189		0.1435	0.284988	0.429763	0.754638	0.206891	0.556174	0.097517	0.130139	0.069867		0.245979	0.206459	0.782592	0.467744	0.114187	0.317833	0.348531	0.516032
	0.1445	0.992504	0.521733	0.508505	0.67581	1.88748	0.739418	0.227293		1.11264	0.136159	0.138438	0.149606	0.960368	0.369537	0.029189		0.1445	0.284988	0.429763	0.760048	0.22117	0.704367	0.097517	0.130139	0.069867		0.245979	0.206459	0.782592	0.467744	0.114187	0.317833	0.348531	0.519585
	0.1455	1.05936	0.521733	0.508505	0.734514	1.88748	0.739418	0.227293		1.11264	0.136159	0.138438	0.149606	0.960368	0.369537	0.029189		0.1455	0.284988	0.441589	0.750617	0.279902	0.704367	0.097517	0.130139	0.081743		0.245979	0.206459	0.802021	0.439521	0.114187	0.310862	0.325401	0.550267
	0.1465	1.05936	0.521733	0.508505	0.734514	1.58099	0.739418	0.227293		1.11264	0.136159	0.138438	0.149606	0.960368	0.369537	0.029189		0.1465	0.284988	0.450065	0.743459	0.279902	0.704367	0.097517	0.130139	0.081743		0.245979	0.206459	0.802021	0.439521	0.114187	0.310862	0.325401	0.478023
	0.1475	0.934584	0.510255	0.508505	0.734514	1.63764	0.73244	0.227293		1.11264	0.136159	0.138438	0.149606	0.960368	0.369537	0.029189		0.1475	0.284988	0.450065	0.740248	0.279902	0.665761	0.097517	0.130139	0.082306		0.280075	0.246761	0.802021	0.439521	0.114187	0.310862	0.309843	0.478023
	0.1485	0.910475	0.510255	0.508505	0.740036	1.6755	0.738791	0.227293		1.11264	0.136159	0.138438	0.149606	0.883484	0.369537	0.029189		0.1485	0.284988	0.450065	0.740248	0.279902	0.665761	0.097517	0.130139	0.082306		0.297285	0.246761	0.802994	0.43902	0.114187	0.310862	0.309843	0.470529
	0.1495	0.910475	0.510255	0.508505	0.740036	1.6755	0.752785	0.227293		1.11264	0.136159	0.138438	0.149606	0.910949	0.369537	0.029189		0.1495	0.284988	0.436242	0.739126	0.279902	0.719244	0.097517	0.130139	0.082306		0.297057	0.274481	0.80733	0.454995	0.114187	0.310862	0.309843	0.470529
	0.1505	0.910475	0.510255	0.508505	0.740036	1.62573	0.727852	0.227293		1.11264	0.136159	0.138438	0.149606	0.929195	0.369537	0.029189		0.1505	0.284988	0.436242	0.739126	0.279902	0.719244	0.097517	0.130139	0.082306		0.297057	0.274481	0.80733	0.386587	0.114187	0.310862	0.287516	0.449521
	0.1515	0.910475	0.510255	0.508505	0.740036	1.62573	0.716058	0.227293		1.11264	0.136159	0.138438	0.149606	0.938816	0.369537	0.029189		0.1515	0.284988	0.463636	0.739126	0.266743	0.719244	0.097517	0.130139	0.082306		0.297057	0.274481	0.843913	0.386587	0.114187	0.336613	0.287516	0.449521
	0.1525	0.91333	0.510255	0.508505	0.740036	1.60732	0.72842	0.227293		0.989518	0.136159	0.138438	0.149606	0.932105	0.369537	0.029189		0.1525	0.284988	0.453798	0.739126	0.266743	0.719244	0.097517	0.130139	0.082306		0.297057	0.274481	0.843913	0.396046	0.114187	0.336613	0.31394	0.449521
	0.1535	0.91333	0.510255	0.508505	0.740036	1.57709	0.72842	0.227293		0.99511	0.136159	0.138438	0.149606	0.932105	0.369537	0.029189		0.1535	0.284988	0.460956	0.739126	0.266743	0.719244	0.097517	0.130139	0.082306		0.297057	0.274481	0.843913	0.396046	0.114187	0.325915	0.31394	0.449521
	0.1545	0.91333	0.510255	0.508505	0.737959	1.58514	0.726804	0.227293		0.974349	0.136159	0.138438	0.149606	0.932105	0.37723	0.029189		0.1545	0.294094	0.460956	0.744379	0.266743	0.719244	0.097517	0.130139	0.089505		0.297057	0.274481	0.873544	0.396046	0.114187	0.378272	0.342372	0.449521
	0.1555	0.91333	0.700761	0.508505	0.737959	1.58514	0.726804	0.23245		0.974349	0.136159	0.138438	0.149606	1.18673	0.37723	0.029189		0.1555	0.294094	0.490728	0.744379	0.270524	0.719244	0.097517	0.130139	0.089505		0.297057	0.274481	0.956517	0.408759	0.114187	0.359142	0.342372	0.459989
	0.1565	0.91333	0.700761	0.508505	0.737959	1.55585	0.726684	0.23245		1.12722	0.136159	0.138438	0.149606	1.18673	0.37723	0.029189		0.1565	0.294094	0.543294	0.741514	0.298233	0.719244	0.097517	0.130139	0.089505		0.297057	0.274481	0.956517	0.426613	0.114187	0.359142	0.342372	0.44303
	0.1575	0.91333	0.700761	0.508505	0.737959	1.62513	0.726684	0.23245		1.12722	0.136159	0.138438	0.152202	1.21177	0.386282	0.029189		0.1575	0.294094	0.470522	0.710911	0.298233	0.719244	0.097517	0.130139	0.089505		0.297057	0.274481	0.92457	0.426613	0.114187	0.359142	0.342372	0.44303
	0.1585	0.91333	0.700761	0.508505	0.737959	1.71707	0.712835	0.23245		1.38314	0.136159	0.102507	0.152202	1.2122	0.386282	0.029189		0.1585	0.328353	0.470522	0.710911	0.32129	0.681785	0.097517	0.130139	0.089505		0.297057	0.274481	0.92457	0.389032	0.114187	0.359142	0.342372	0.44584
	0.1595	0.91333	0.700761	0.508505	0.722654	1.71707	0.712835	0.23245		1.38314	0.136159	0.102507	0.152202	1.18481	0.403188	0.029189		0.1595	0.328353	0.491933	0.710911	0.32129	0.681785	0.097517	0.130139	0.09933		0.297057	0.274481	0.879374	0.389032	0.114187	0.359142	0.371259	0.529783
	0.1605	0.91333	0.700761	0.508505	0.722654	1.67144	0.712835	0.23245		1.38314	0.136159	0.102507	0.152202	1.04299	0.403188	0.029189		0.1605	0.328353	0.545887	0.742509	0.330419	0.673349	0.097517	0.130139	0.09933		0.32664	0.274481	0.879374	0.3667	0.114187	0.359142	0.371259	0.529783
	0.1615	0.91333	0.399841	0.508505	0.722654	1.64082	0.712835	0.23245		1.38314	0.136159	0.102507	0.152202	1.04299	0.430625	0.029189		0.1615	0.328353	0.545887	0.742509	0.330419	0.744322	0.097517	0.130139	0.09933		0.32664	0.267422	0.890928	0.40665	0.114187	0.367909	0.371259	0.529783
	0.1625	0.846863	0.399841	0.508505	0.723121	1.73855	0.724254	0.23245		1.38314	0.136159	0.102507	0.148525	1.04906	0.465684	0.029189		0.1625	0.328353	0.49835	0.730785	0.346314	0.744322	0.097517	0.130139	0.09933		0.32664	0.267422	0.88171	0.420355	0.114187	0.367909	0.371259	0.529783
	0.1635	0.846863	0.399841	0.508505	0.723121	1.68049	0.729397	0.23245		1.38314	0.136159	0.102507	0.148525	1.04906	0.465684	0.029189		0.1635	0.328353	0.502847	0.730785	0.346314	0.744322	0.097517	0.130139	0.09933		0.32664	0.267422	0.792369	0.431123	0.114187	0.370099	0.371259	0.541967
	0.1645	0.846863	0.399841	0.508505	0.723121	1.60518	0.729397	0.23245		1.38314	0.136159	0.102507	0.148525	1.0169	0.465684	0.029189		0.1645	0.328353	0.502847	0.730785	0.31736	0.919977	0.097517	0.130139	0.09933		0.329391	0.267422	0.854762	0.42133	0.114187	0.387397	0.3727	0.575187
	0.1655	0.846863	0.399841	0.508505	0.723121	1.60518	0.694067	0.23245		1.38314	0.136159	0.102507	0.148525	0.92187	0.504741	0.029189		0.1655	0.328353	0.541401	0.75928	0.31736	0.919977	0.097517	0.130139	0.109814		0.329391	0.272092	0.854762	0.39037	0.114187	0.387397	0.3727	0.575187
	0.1665	0.846863	0.399841	0.508505	0.723121	1.65003	0.694067	0.23245		1.38314	0.136159	0.102507	0.148525	0.92187	0.448479	0.029189		0.1665	0.328353	0.544309	0.735938	0.31736	0.919977	0.097517	0.130139	0.160632		0.336585	0.272092	0.822358	0.39037	0.114187	0.339157	0.3727	0.611317
	0.1675	0.856946	0.399841	0.508505	0.756947	1.65309	0.65161	0.233651		1.40196	0.136159	0.102507	0.148525	0.905099	0.448479	0.029189		0.1675	0.328353	0.544309	0.736984	0.31736	0.919977	0.097517	0.130139	0.160632		0.336585	0.286569	0.822358	0.382014	0.114187	0.339157	0.379742	0.611317
	0.1685	0.856946	0.399841	0.508505	0.756947	1.78039	0.65161	0.233651		1.32547	0.136159	0.102507	0.148525	0.910626	0.437522	0.029189		0.1685	0.328353	0.557666	0.736984	0.31736	0.950808	0.097517	0.130139	0.160632		0.282214	0.331507	0.858625	0.444742	0.114187	0.346012	0.379742	0.611317
	0.1695	0.856946	0.399841	0.508505	0.756947	1.7102	0.65161	0.233651		1.32547	0.136159	0.102507	0.148525	0.910626	0.437522	0.029189		0.1695	0.328353	0.598266	0.712081	0.318296	0.984916	0.097517	0.135085	0.178583		0.282214	0.331507	0.773098	0.510165	0.41135	0.346012	0.375928	0.590741
	0.1705	0.856946	0.186103	0.508505	0.756947	1.73452	0.65161	0.233651		1.32547	0.136159	0.102507	0.148525	0.911472	0.437522	0.029189		0.1705	0.328353	0.598266	0.711996	0.318296	0.984916	0.097517	0.135085	0.120649		0.282214	0.331507	0.773098	0.510165	0.41135	0.346012	0.368392	0.590741
	0.1715	0.856946	0.186103	0.508505	0.756947	1.87724	0.687522	0.233651		1.32547	0.136159	0.102507	0.170076	0.9089	0.437522	0.029189		0.1715	0.328353	0.563116	0.690162	0.318296	0.984916	0.097517	0.135085	0.120649		0.282214	0.44319	0.773098	0.447392	0.41135	0.371526	0.368392	0.583472
	0.1725	0.856946	0.186103	0.508505	0.756947	1.79455	0.687522	0.233651		1.32547	0.109172	0.102507	0.170076	0.921641	0.488126	0.029189		0.1725	0.328353	0.680691	0.690162	0.318296	0.799043	0.097517	0.135085	0.127457		0.282214	0.44319	0.773098	0.460009	0.41135	0.371526	0.385306	0.595259
	0.1735	0.856946	0.186103	0.508505	0.756947	1.89909	0.686686	0.233651		1.00954	0.109172	0.102507	0.170076	0.975072	0.471661	0.029189		0.1735	0.328353	0.687373	0.690162	0.318296	0.799043	0.097517	0.135085	0.127457		0.282214	0.44319	0.741614	0.460009	0.41135	0.360902	0.385306	0.59688
	0.1745	0.856946	0.186103	0.508505	0.756947	1.92191	0.683731	0.233651		1.09898	0.109072	0.102507	0.170076	0.975072	0.471661	0.029189		0.1745	0.328353	0.55588	0.695116	0.318296	0.799043	0.097517	0.135085	0.127457		0.282214	0.443955	0.783093	0.487709	0.41135	0.360902	0.385306	0.59688
	0.1755	0.856946	0.186103	0.508505	0.762569	1.78924	0.683731	0.233651		1.09898	0.109072	0.102507	0.170076	0.969103	0.428616	0.029189		0.1755	0.328353	0.421016	0.695116	0.33293	0.799043	0.097517	0.135085	0.127457		0.282214	0.443955	0.783093	0.571102	0.41135	0.360902	0.38649	0.598938
	0.1765	0.867434	0.186103	0.508505	0.755692	1.70891	0.683731	0.233651		1.14151	0.109072	0.102507	0.170076	0.969103	0.428616	0.029189		0.1765	0.268978	0.43311	0.695116	0.33293	0.799043	0.097517	0.135085	0.127457		0.282214	0.519908	0.872891	0.571102	0.41135	0.360902	0.38649	0.555484
	0.1775	0.867434	0.186103	0.508505	0.755692	1.74928	0.687044	0.233651		1.14151	0.109072	0.102507	0.170076	0.969103	0.389825	0.029189		0.1775	0.268978	0.43311	0.689633	0.33293	0.799043	0.097517	0.135085	0.127457		0.282214	0.519908	0.852648	0.494566	0.646226	0.359971	0.38649	0.54501
	0.1785	0.87553	0.186103	0.508505	0.755692	1.74928	0.687044	0.233651		1.1039	0.109072	0.102507	0.170076	0.969103	0.356211	0.029189		0.1785	0.268978	0.52814	0.696237	0.381119	0.611231	0.097517	0.168151	0.140014		0.280655	0.530172	0.913161	0.494566	0.646226	0.359971	0.401185	0.54501
	0.1795	0.87553	0.186103	0.508505	0.754437	1.73395	0.695096	0.233651		1.1039	0.109072	0.102507	0.170076	0.969103	0.356211	0.029189		0.1795	0.268978	0.523966	0.696237	0.381119	0.611231	0.097517	0.179234	0.140014		0.280655	0.46323	0.934879	0.488233	0.646226	0.359971	0.389195	0.54501
	0.1805	0.87553	0.186103	0.507397	0.754437	1.73395	0.695096	0.233651		1.1039	0.109072	0.102507	0.170076	0.951436	0.356211	0.029189		0.1805	0.268978	0.514569	0.696237	0.381119	0.611231	0.097517	0.179234	0.146587		0.307383	0.437713	0.934879	0.488233	0.646226	0.359971	0.389195	0.54575
	0.1815	0.87553	0.186103	0.567173	0.754437	1.62062	0.695096	0.233651		1.1039	0.109072	0.102507	0.170076	0.968165	0.313364	0.029189		0.1815	0.268978	0.514569	0.696237	0.381119	0.611231	0.097517	0.179234	0.146587		0.307383	0.442986	0.800857	0.508252	0.646226	0.359971	0.389195	0.54575
	0.1825	0.87553	0.186103	0.567173	0.768036	1.65521	0.694454	0.233651		1.1039	0.109072	0.102507	0.170076	0.913578	0.32771	0.029189		0.1825	0.268978	0.514569	0.696237	0.381119	0.611231	0.097517	0.179234	0.146587		0.289098	0.442986	0.800857	0.509548	1.13015	0.336192	0.389195	0.54575
	0.1835	0.894407	0.186103	0.567173	0.768036	1.61497	0.663409	0.233651		1.1039	0.109072	0.102507	0.170076	0.931386	0.32771	0.029189		0.1835	0.268978	0.478224	0.709959	0.381119	0.482356	0.097517	0.179234	0.146587		0.289098	0.489199	0.800857	0.538862	1.13015	0.336528	0.389195	0.54575
	0.1845	0.894407	0.186103	0.567972	0.768036	1.60287	0.657311	0.233651		1.1039	0.109072	0.102507	0.170076	0.954737	0.32771	0.029189		0.1845	0.284147	0.50428	0.764803	0.381119	0.482356	0.097517	0.179234	0.146587		0.289098	0.496147	0.850839	0.545444	1.13015	0.335402	0.378056	0.54575
	0.1855	0.894407	0.186103	0.567972	0.768036	1.65224	0.65258	0.233651		1.07085	0.109072	0.102507	0.170076	0.954737	0.32771	0.029189		0.1855	0.284147	0.50428	0.770916	0.391845	0.482356	0.097517	0.179234	0.146587		0.289098	0.516876	0.850839	0.701096	0.832028	0.335402	0.412184	0.541533
	0.1865	0.918273	0.186103	0.567972	0.768036	1.46662	0.657273	0.233651		0.963597	0.109072	0.102507	0.170076	0.990446	0.32771	0.029189		0.1865	0.284147	0.534095	0.794326	0.399321	0.482356	0.097517	0.179234	0.152612		0.289098	0.516876	0.850839	0.594797	0.832028	0.337433	0.452516	0.538622
	0.1875	0.918273	0.186103	0.567972	0.768036	1.46662	0.657273	0.233651		0.963597	0.109072	0.102507	0.170076	1.20275	0.32771	0.029189		0.1875	0.284147	0.534095	0.804131	0.409272	0.482356	0.097517	0.179234	0.152612		0.319368	0.516876	0.844706	0.541046	0.832028	0.337433	0.452516	0.539955
	0.1885	0.917732	0.186103	0.567972	0.768036	1.44337	0.657273	0.233651		0.963597	0.109072	0.102507	0.170076	1.20076	0.32771	0.029189		0.1885	0.309307	0.534095	0.859114	0.409272	0.482356	0.097517	0.179234	0.147515		0.319368	0.461215	0.873629	0.463605	0.832028	0.321167	0.452516	0.560465
	0.1895	0.917732	0.186103	0.567972	0.76886	1.45207	0.687174	0.233651		0.963597	0.109072	0.102507	0.170076	1.20076	0.32771	0.029189		0.1895	0.309307	0.558207	0.859114	0.409272	0.482356	0.097517	0.179234	0.147515		0.319368	0.461215	0.832882	0.463605	0.832028	0.321167	0.452516	0.56795
	0.1905	0.917732	0.186103	0.567972	0.76886	1.46917	0.687174	0.233651		1.2149	0.109072	0.102507	0.181943	1.12363	0.389511	0.029189		0.1905	0.309307	0.558207	0.846902	0.409272	0.482356	0.097517	0.179234	0.147515		0.319368	0.461215	0.899027	0.454329	0.832028	0.345058	0.452516	0.56795
	0.1915	0.917732	0.186103	0.610478	0.76886	1.49396	0.687174	0.233651		1.14927	0.109072	0.102507	0.181943	1.14633	0.393456	0.029189		0.1915	0.309307	0.491485	0.835135	0.409272	0.326854	0.097517	0.179234	0.147515		0.319368	0.461215	0.899027	0.50077	0.832028	0.337018	0.430654	0.56795
	0.1925	0.917732	0.186103	0.610478	0.76886	1.49396	0.687174	0.233651		1.14927	0.109072	0.102507	0.181943	1.14633	0.393456	0.029189		0.1925	0.309307	0.491485	0.77675	0.407103	0.320712	0.097517	0.179234	0.147515		0.319368	0.453554	0.899027	0.517238	0.453869	0.337018	0.41406	0.626073
	0.1935	0.969433	0.186103	0.80949	0.76886	1.49396	0.687174	0.233651		1.14927	0.109072	0.102507	0.181943	0.986031	0.491964	0.029189		0.1935	0.309307	0.491485	0.77675	0.395809	0.320712	0.097517	0.179234	0.14847		0.305533	0.453554	0.902454	0.517238	0.453869	0.365612	0.41406	0.638711
	0.1945	0.966243	0.186103	0.80949	0.76886	1.55195	0.687174	0.233651		1.14927	0.117867	0.102507	0.181943	0.928699	0.491964	0.029189		0.1945	0.309307	0.491485	0.783905	0.395809	0.320712	0.097517	0.179234	0.14847		0.305533	0.453554	0.902454	0.544496	0.453869	0.365612	0.41406	0.638711
	0.1955	0.966243	0.186103	0.80949	0.76886	1.56402	0.692044	0.233651		1.10042	0.117867	0.102507	0.181943	0.928699	0.491964	0.029189		0.1955	0.309307	0.518547	0.783905	0.33562	0.3197	0.100056	0.179234	0.158437		0.305533	0.421189	0.85415	0.544496	0.453869	0.361083	0.41406	0.699217
	0.1965	1.05311	0.24857	0.80949	0.76886	1.56402	0.696509	0.233651		1.10042	0.117867	0.102507	0.181943	0.928699	0.491964	0.029189		0.1965	0.317468	0.518547	0.783524	0.33562	0.3197	0.100056	0.179234	0.158437		0.308747	0.440877	0.851143	0.637253	0.453869	0.361083	0.41406	0.668071
	0.1975	1.05311	0.24857	0.80949	0.76886	1.91171	0.68905	0.233651		1.10042	0.117867	0.102507	0.181943	0.928699	0.491964	0.029189		0.1975	0.317468	0.522851	0.777548	0.33562	0.3197	0.100056	0.179234	0.158437		0.308747	0.440877	0.911631	0.663524	0.453869	0.361083	0.441239	0.668071
	0.1985	1.11561	0.24857	0.80949	0.76886	1.91917	0.675915	0.233651		1.08409	0.117867	0.102507	0.181943	0.928699	0.491964	0.029189		0.1985	0.317468	0.473876	0.768532	0.33562	0.3197	0.100056	0.201219	0.158437		0.287624	0.440877	0.891851	0.536749	0.467359	0.361083	0.43055	0.668071
	0.1995	1.10899	0.24857	0.80949	0.76886	1.91917	0.680331	0.233651		1.08409	0.117867	0.102507	0.181943	0.90626	0.481465	0.029189		0.1995	0.317468	0.48297	0.768532	0.344723	0.3197	0.100056	0.201219	0.157249		0.339919	0.393249	0.898885	0.536749	0.728654	0.361083	0.399863	0.668071
	0.2005	1.10705	0.24857	0.80949	0.76886	1.89547	0.680331	0.233651		1.08409	0.117867	0.102507	0.181943	0.881822	0.483668	0.029189		0.2005	0.341668	0.498657	0.768532	0.40805	0.383511	0.100056	0.201219	0.157249		0.339919	0.393249	0.898885	0.536749	0.996497	0.400952	0.399863	0.652758
	0.2015	1.10705	0.24857	0.80949	0.76886	2.0055	0.674914	0.233651		1.08409	0.117867	0.102507	0.181943	0.881822	0.483668	0.029189		0.2015	0.341668	0.498657	0.768532	0.412549	0.383511	0.100056	0.201219	0.15769		0.339919	0.393249	0.898885	0.503325	0.996497	0.397679	0.404927	0.69301
	0.2025	1.10705	0.24857	0.80949	0.76886	2.03391	0.667544	0.233651		0.991489	0.117867	0.102507	0.181943	0.858395	0.484264	0.029189		0.2025	0.341668	0.549117	0.789712	0.412549	0.383511	0.100056	0.201219	0.167897		0.339919	0.393249	0.880983	0.503325	0.996497	0.418744	0.404927	0.69301
	0.2035	1.10705	0.24857	0.80949	0.76886	2.03195	0.658648	0.233651		0.991489	0.117867	0.132885	0.181943	0.87824	0.484264	0.029189		0.2035	0.365794	0.549117	0.789712	0.412549	0.383511	0.100056	0.201219	0.167897		0.353077	0.393249	0.930885	0.544807	0.390926	0.418744	0.404927	0.706843
	0.2045	1.10705	0.24857	0.80949	0.76886	1.7831	0.674545	0.233651		0.991489	0.117867	0.132885	0.181943	0.894406	0.484264	0.029189		0.2045	0.390188	0.543303	0.789712	0.419906	0.383511	0.100056	0.201219	0.167897		0.353077	0.393249	0.930885	0.571389	0.390926	0.418744	0.418862	0.706843
	0.2055	1.10705	0.24857	0.80949	0.72294	1.82563	0.6707	0.233651		0.991489	0.117867	0.132885	0.181943	0.894406	0.484264	0.029189		0.2055	0.390188	0.483812	0.789712	0.419906	0.383511	0.100056	0.201219	0.175787		0.353077	0.393249	0.930885	0.81996	0.390926	0.418744	0.418862	0.677908
	0.2065	1.22607	0.360167	0.789712	0.72294	1.76318	0.6707	0.241304		0.877612	0.117867	0.132885	0.181943	0.907257	0.548629	0.029189		0.2065	0.390188	0.483812	0.789712	0.419906	0.383511	0.100056	0.19086	0.175787		0.353077	0.306865	0.930885	0.811326	0.126883	0.366981	0.418862	0.703864
	0.2075	1.22607	0.360167	0.789712	0.72294	1.66088	0.635953	0.241304		0.72379	0.117867	0.132885	0.181943	0.955343	0.548629	0.029189		0.2075	0.390188	0.483812	0.781922	0.419906	0.383511	0.100056	0.19086	0.175787		0.355427	0.306865	0.972807	0.811326	0.126883	0.366981	0.418862	0.703864
	0.2085	1.22607	0.360167	0.789712	0.72294	1.66001	0.635953	0.241304		0.72379	0.117867	0.132885	0.181943	1.01437	0.671343	0.029189		0.2085	0.390188	0.483812	0.775419	0.419906	0.383511	0.117991	0.19086	0.18052		0.355427	0.309967	0.958898	0.811326	0.126883	0.365058	0.418862	0.669815
	0.2095	1.22607	0.360167	0.789712	0.718483	1.65351	0.635953	0.265292		0.865616	0.117867	0.132885	0.181982	1.01437	0.721432	0.029189		0.2095	0.390188	0.440371	0.799275	0.419906	0.383511	0.168332	0.216991	0.18052		0.355427	0.309967	0.986351	0.856764	0.126883	0.365058	0.387967	0.739929
	0.2105	1.22607	0.369893	0.789712	0.718483	1.65351	0.635953	0.265292		0.865616	0.117867	0.132885	0.181982	1.00912	0.708601	0.029189		0.2105	0.390188	0.440371	0.810892	0.474619	0.488801	0.168332	0.216991	0.182859		0.355427	0.338829	0.95046	0.856764	0.126883	0.384744	0.449892	0.75517
	0.2115	1.22607	0.369893	0.567185	0.718483	1.58932	0.635953	0.265292		0.865616	0.121979	0.132885	0.181982	1.00912	0.658392	0.029189		0.2115	0.390188	0.443855	0.810892	0.474619	0.488801	0.168332	0.216991	0.182859		0.355427	0.338829	0.922918	0.766972	0.126883	0.384744	0.449892	0.7742
	0.2125	1.22607	0.369893	0.567185	0.718483	1.53296	0.633922	0.265292		0.865616	0.121979	0.132885	0.181982	1.02753	0.658392	0.029189		0.2125	0.390188	0.443855	0.810892	0.486649	0.460461	0.183786	0.216991	0.182859		0.389413	0.338829	0.922918	0.695699	0.126883	0.391258	0.449892	0.7742
	0.2135	1.18722	0.369893	0.567185	0.718483	1.53296	0.669269	0.265292		0.865616	0.121979	0.132885	0.181982	1.06133	0.520858	0.029189		0.2135	0.390188	0.404303	0.810892	0.486649	0.460461	0.183786	0.238419	0.199653		0.389413	0.360482	0.922918	0.710236	0.126883	0.377686	0.45643	0.752291
	0.2145	1.18722	0.369893	0.56298	0.695854	1.6019	0.675233	0.265292		0.865616	0.121979	0.132885	0.181982	1.06133	0.520858	0.029189		0.2145	0.390188	0.404303	0.820364	0.488881	0.460461	0.183786	0.238419	0.199653		0.389032	0.360482	0.90047	0.710236	0.126883	0.362871	0.45643	0.700575
	0.2155	1.18722	0.369893	0.56298	0.695854	1.6019	0.675233	0.265292		0.865616	0.110341	0.132885	0.181982	1.01092	0.520858	0.029189		0.2155	0.390188	0.405568	0.826605	0.492618	0.460461	0.183786	0.238419	0.197959		0.389032	0.360482	0.90047	0.724822	0.126883	0.362871	0.424274	0.754453
	0.2165	1.09999	0.369893	0.56298	0.656119	1.6019	0.675233	0.265292		0.865616	0.110341	0.132885	0.181982	1.00187	0.524408	0.029189		0.2165	0.423539	0.408564	0.826605	0.492618	0.460461	0.183786	0.238419	0.197959		0.389032	0.367428	0.904478	0.724822	0.126883	0.362871	0.424274	0.763996
	0.2175	1.09999	0.369893	0.56298	0.656119	1.58642	0.675233	0.28925		0.865616	0.110341	0.132885	0.181982	0.975349	0.621005	0.029189		0.2175	0.423539	0.408564	0.826605	0.492618	0.460461	0.19827	0.251314	0.197959		0.389032	0.368412	0.858143	0.724822	0.126883	0.356983	0.424274	0.743534
	0.2185	1.09999	0.369893	0.56298	0.656119	1.58642	0.675233	0.289413		0.865616	0.110341	0.132885	0.181982	0.996777	0.621005	0.029189		0.2185	0.423539	0.415293	0.826605	0.447741	0.460461	0.19827	0.251314	0.197959		0.389032	0.368412	0.858143	0.724822	0.126883	0.356983	0.507509	0.767342
	0.2195	1.09999	0.369893	0.56298	0.656119	1.61477	0.675233	0.289413		0.809396	0.110341	0.132885	0.181982	0.996777	0.621005	0.029189		0.2195	0.423539	0.415293	0.812398	0.447741	0.460461	0.19827	0.251314	0.198552		0.418016	0.390715	0.858143	0.805586	0.126883	0.356983	0.507509	0.767342
	0.2205	1.09999	0.369893	0.56298	0.656119	1.62693	0.669847	0.289413		0.809396	0.110341	0.132885	0.181982	0.97882	0.621005	0.029189		0.2205	0.426733	0.415293	0.88567	0.447741	0.561035	0.19827	0.251314	0.218081		0.425394	0.390715	0.854881	0.775884	0.126883	0.356983	0.538288	0.777798
	0.2215	1.11292	0.445249	0.56298	0.656119	1.54061	0.665216	0.289413		0.809396	0.110341	0.132885	0.181982	0.97882	0.643485	0.029189		0.2215	0.426733	0.415293	0.886447	0.447741	0.561035	0.209686	0.251314	0.218081		0.425394	0.390715	0.867984	0.793487	0.126883	0.356983	0.519579	0.731326
	0.2225	1.11292	0.445249	0.56298	0.656119	1.54061	0.670058	0.289413		1.42636	0.110341	0.132885	0.181982	0.951227	0.629157	0.029189		0.2225	0.426733	0.415293	0.87419	0.447741	0.561035	0.209686	0.251314	0.226138		0.425394	0.380507	0.884883	0.837507	0.126883	0.362974	0.519579	0.731326
	0.2235	1.11292	0.445249	0.56298	0.656119	1.54061	0.670058	0.289413		1.42636	0.110341	0.132885	0.15907	0.975123	0.61707	0.029189		0.2235	0.426733	0.361142	0.86916	0.447741	0.561035	0.209686	0.251314	0.226138		0.486211	0.387338	0.884883	0.882545	0.126883	0.362974	0.519579	0.662605
	0.2245	1.11292	0.445249	0.564959	0.656119	1.54318	0.670058	0.289413		1.42636	0.110341	0.132885	0.15907	0.975123	0.653963	0.029189		0.2245	0.426733	0.362551	0.86916	0.447741	0.561035	0.209686	0.251314	0.226138		0.486211	0.395147	0.83259	0.810016	0.181201	0.362974	0.519579	0.670117
	0.2255	0.996372	0.445249	0.564959	0.656119	1.53423	0.703822	0.289413		1.42636	0.110341	0.132885	0.15907	0.972862	0.653963	0.029189		0.2255	0.43711	0.36821	0.879719	0.447741	0.495212	0.209686	0.289111	0.226138		0.486211	0.395147	0.83259	0.810016	0.181201	0.362974	0.575258	0.658617
	0.2265	1.05494	0.389902	0.564959	0.656119	1.53423	0.729305	0.289413		0.878722	0.110341	0.132885	0.15907	0.972862	0.56765	0.029189		0.2265	0.43711	0.36821	0.789376	0.447741	0.495212	0.209686	0.289111	0.226138		0.486211	0.395147	0.892381	0.699546	0.181201	0.362974	0.575258	0.658617
	0.2275	1.05494	0.389902	0.564959	0.656119	1.53423	0.716391	0.289413		0.878722	0.110341	0.132885	0.15907	1.05712	0.631519	0.029189		0.2275	0.402069	0.388046	0.775108	0.447741	0.495212	0.17903	0.289111	0.226138		0.486211	0.415465	0.90214	0.699546	0.181201	0.362974	0.575258	0.64295
	0.2285	1.05494	0.32517	0.564959	0.656119	1.53116	0.716391	0.289413		0.878722	0.110341	0.132885	0.15907	1.05712	0.631519	0.029189		0.2285	0.402069	0.388046	0.807631	0.447741	0.509177	0.17903	0.289111	0.227671		0.486211	0.415465	0.90214	0.699546	0.181201	0.348484	0.55289	0.654419
	0.2295	1.05494	0.32517	0.564959	0.656119	1.52846	0.714673	0.289413		1.09947	0.110341	0.132885	0.15907	1.05712	0.602904	0.029189		0.2295	0.402069	0.392557	0.795609	0.447741	0.509177	0.17903	0.289111	0.237206		0.486211	0.415465	0.90214	0.731545	0.162929	0.36454	0.580038	0.61572
	0.2305	1.05494	0.32517	0.564959	0.656119	1.50694	0.714673	0.289413		1.09947	0.110341	0.132885	0.15907	1.08708	0.602904	0.029189		0.2305	0.402069	0.408638	0.778286	0.447741	0.509177	0.17903	0.289111	0.237206		0.444593	0.415465	0.953476	0.764957	0.162929	0.381134	0.610372	0.61572
	0.2315	1.09742	0.32517	0.564959	0.652825	1.49614	0.704531	0.289413		1.09947	0.110341	0.132885	0.15907	1.08708	0.544915	0.029189		0.2315	0.402069	0.465706	0.778286	0.459518	0.509177	0.17903	0.289111	0.238757		0.444593	0.415465	0.951085	0.76339	0.162929	0.410904	0.606297	0.61572
	0.2325	1.07788	0.32517	0.564959	0.647896	1.53751	0.699924	0.289413		1.09947	0.110341	0.132885	0.15907	1.03331	0.582538	0.029189		0.2325	0.402069	0.465706	0.778286	0.448242	0.509177	0.17903	0.289111	0.249879		0.444593	0.415465	0.926531	0.811139	0.162929	0.410904	0.606297	0.61572
	0.2335	1.07788	0.32517	0.564959	0.637153	1.52729	0.699924	0.289413		1.09947	0.110341	0.132885	0.15907	1.09597	0.582538	0.029189		0.2335	0.402069	0.545583	0.778286	0.448242	0.509177	0.17903	0.289111	0.274569		0.486442	0.415465	0.86805	0.742873	0.313233	0.40988	0.606297	0.584375
	0.2345	1.0799	0.405424	0.564959	0.637153	1.63011	0.699924	0.289413		1.18668	0.110341	0.132885	0.15907	1.07084	0.582538	0.029189		0.2345	0.402069	0.545583	0.778286	0.448242	0.509177	0.17903	0.294316	0.274569		0.486442	0.408014	0.86805	0.742873	0.313233	0.40988	0.606297	0.535675
	0.2355	1.02163	0.405424	0.564959	0.637153	1.62919	0.699924	0.289413		1.18668	0.110341	0.132885	0.15907	1.07084	0.719255	0.029189		0.2355	0.402069	0.415252	0.778286	0.420621	0.402523	0.17903	0.294316	0.266514		0.476895	0.566672	0.86805	0.709006	0.313233	0.40988	0.558394	0.552123
	0.2365	1.02163	0.405424	0.564959	0.637153	1.63352	0.699924	0.289413		1.18217	0.110341	0.132885	0.15907	1.06338	0.745285	0.029189		0.2365	0.402069	0.415252	0.765301	0.420621	0.402523	0.17903	0.294316	0.266514		0.476895	0.537954	0.86805	0.725735	0.313233	0.40988	0.551483	0.552123
	0.2375	1.02163	0.405424	0.529523	0.637153	1.63352	0.698378	0.289413		1.18217	0.110341	0.132885	0.15907	1.0071	0.707566	0.029189		0.2375	0.402069	0.415252	0.737896	0.430056	0.402523	0.17903	0.319531	0.266514		0.476895	0.657508	0.86805	0.450865	0.313233	0.424622	0.603956	0.555717
	0.2385	1.02163	0.405424	0.529523	0.637153	1.63352	0.698378	0.289413		1.18217	0.110341	0.132885	0.15907	1.0071	0.583382	0.029189		0.2385	0.402069	0.415252	0.760011	0.428123	0.402523	0.17903	0.324012	0.263982		0.450868	0.659817	0.86805	0.460825	0.313233	0.424622	0.603956	0.555717
	0.2395	1.02163	0.405424	0.529523	0.637153	1.63352	0.702956	0.289413		1.18217	0.110341	0.132885	0.15907	0.98444	0.639409	0.029189		0.2395	0.402069	0.415252	0.727847	0.428123	0.402523	0.17903	0.324012	0.263982		0.450868	0.659817	0.932587	0.48342	0.313233	0.424622	0.603956	0.592697
	0.2405	1.02163	0.405424	0.529523	0.637153	1.65216	0.702956	0.289413		1.18217	0.110341	0.132885	0.15907	0.963266	0.637672	0.029189		0.2405	0.402069	0.415252	0.724089	0.413116	0.402523	0.17903	0.324012	0.251895		0.468057	0.698042	0.969775	0.667533	0.313233	0.439851	0.603956	0.592697
	0.2415	1.02163	0.589306	0.529523	0.637153	1.63798	0.70347	0.289413		1.22338	0.168513	0.132885	0.15907	0.963266	0.655401	0.029189		0.2415	0.431344	0.421632	0.724089	0.422752	0.402523	0.17903	0.324012	0.251895		0.571204	0.732036	0.967232	0.565623	0.313233	0.439851	0.567209	0.615765
	0.2425	1.02163	0.634317	0.529523	0.637153	1.64298	0.688707	0.289413		1.06403	0.168513	0.132885	0.15907	0.963266	0.655401	0.029189		0.2425	0.431344	0.421632	0.714305	0.422752	0.402523	0.176012	0.324012	0.263298		0.571204	0.732036	0.967232	0.565623	0.313233	0.439851	0.567209	0.615765
	0.2435	1.02163	0.634317	0.529523	0.637153	1.64298	0.692208	0.289413		1.06403	0.168513	0.132885	0.15907	0.963266	0.655401	0.029189		0.2435	0.431344	0.421632	0.714305	0.422752	0.402523	0.176012	0.324012	0.262497		0.571204	0.730502	0.943539	0.571551	0.313233	0.439851	0.611163	0.608922
	0.2445	1.02163	0.634317	0.529523	0.631378	1.65823	0.677024	0.289413		1.06403	0.168513	0.132885	0.15907	0.965436	0.655401	0.029189		0.2445	0.431344	0.40807	0.73736	0.422752	0.402523	0.195612	0.324012	0.262497		0.571204	0.730502	0.943539	0.792212	0.313233	0.439851	0.611163	0.608922
	0.2455	0.957412	0.634317	0.529523	0.631378	1.64711	0.677024	0.289413		1.06403	0.168513	0.132885	0.15907	0.965436	0.571539	0.029189		0.2455	0.431344	0.453691	0.731026	0.42139	0.512866	0.195612	0.324012	0.282898		0.571204	0.730502	0.943539	0.577705	0.313233	0.439851	0.579818	0.599084
	0.2465	0.992511	0.634317	0.529523	0.631378	1.51552	0.677024	0.289413		1.06403	0.168513	0.132885	0.15907	0.992742	0.571539	0.029189		0.2465	0.431344	0.453691	0.731026	0.401878	0.512866	0.195612	0.324012	0.279043		0.432	0.926523	0.909483	0.577705	0.313233	0.457311	0.579818	0.567713
	0.2475	1.06706	0.508215	0.529523	0.631378	1.57179	0.663746	0.289413		1.1362	0.168513	0.132885	0.15907	0.969112	0.570785	0.029189		0.2475	0.431344	0.460073	0.731026	0.401878	0.512866	0.195612	0.324012	0.279043		0.460616	0.981224	0.909483	0.69544	0.152028	0.429929	0.586891	0.567713
	0.2485	1.10681	0.508215	0.529523	0.631378	1.56805	0.663746	0.289413		1.1362	0.168513	0.132885	0.15907	0.969112	0.570785	0.029189		0.2485	0.487587	0.474485	0.700226	0.391657	0.512866	0.195612	0.308942	0.279043		0.460616	0.944942	0.909483	0.758264	0.152028	0.429929	0.586891	0.567713
	0.2495	1.10681	0.508215	0.529523	0.631378	1.55404	0.664854	0.289413		1.1362	0.168513	0.132885	0.15907	0.969112	0.570785	0.029189		0.2495	0.491987	0.484368	0.700226	0.391657	0.512866	0.195612	0.308942	0.279043		0.460616	0.944942	0.909483	0.758264	0.152028	0.422653	0.586891	0.585289
	0.2505	1.16709	0.508215	0.529523	0.631378	1.51881	0.664854	0.289413		1.1362	0.168513	0.132885	0.15907	0.969112	0.595434	0.029189		0.2505	0.491987	0.484368	0.698307	0.391657	0.512866	0.195612	0.308942	0.280694		0.460616	0.972069	0.970368	0.81899	0.449776	0.427895	0.56603	0.585289
	0.2515	1.20829	0.508215	0.529523	0.631378	1.51881	0.660674	0.289413		1.10289	0.168513	0.132885	0.15907	0.969112	0.595434	0.029189		0.2515	0.491987	0.484368	0.698307	0.391657	0.512866	0.212003	0.308942	0.280694		0.460616	0.963242	0.965387	0.872523	0.449776	0.435023	0.560988	0.607766
	0.2525	1.20829	0.508215	0.529523	0.662876	1.51881	0.660674	0.289413		1.10289	0.168513	0.132885	0.15907	0.932864	0.595434	0.029189		0.2525	0.491987	0.484368	0.698307	0.391657	0.512866	0.200936	0.308942	0.291746		0.544777	0.963242	0.934535	1.11095	0.449776	0.435023	0.560988	0.622278
	0.2535	1.20829	0.508215	0.529523	0.662876	1.51079	0.664067	0.289413		0.994318	0.168513	0.132885	0.15907	0.938381	0.595434	0.029189		0.2535	0.491987	0.484368	0.714638	0.391657	0.512866	0.200936	0.308942	0.304788		0.544777	0.854818	0.934535	1.21951	0.449776	0.435023	0.560988	0.61143
	0.2545	1.20829	0.508215	0.529523	0.662876	1.49175	0.664067	0.289413		0.994318	0.168513	0.132885	0.15907	0.962879	0.569043	0.029189		0.2545	0.491987	0.533303	0.714638	0.39103	0.667738	0.200936	0.316344	0.304788		0.477633	1.06572	0.934535	1.09336	0.102555	0.416966	0.546679	0.59983
	0.2555	1.24992	0.508215	0.529523	0.662876	1.47991	0.682258	0.289413		0.981865	0.168513	0.132885	0.15907	0.989714	0.569043	0.029189		0.2555	0.491987	0.533303	0.730494	0.39103	0.667738	0.200936	0.316344	0.304788		0.477633	1.04655	0.939356	0.957541	0.102555	0.425939	0.505049	0.59983
	0.2565	1.24992	0.587664	0.529523	0.662876	1.47991	0.682258	0.289413		0.981865	0.168513	0.132885	0.15907	0.998801	0.538018	0.029189		0.2565	0.491987	0.543496	0.730494	0.399827	0.667738	0.200936	0.341468	0.317076		0.477633	0.882961	0.939356	0.898588	0.102555	0.425939	0.475204	0.59983
	0.2575	1.24992	0.587664	0.603453	0.662876	1.47824	0.682258	0.289413		0.981865	0.168513	0.132885	0.15907	0.998801	0.532865	0.029189		0.2575	0.491987	0.543496	0.774373	0.399827	0.667738	0.221203	0.341468	0.326647		0.477633	0.860873	0.950694	0.651245	0.102555	0.425939	0.475204	0.595494
	0.2585	1.24992	0.560503	0.603453	0.662876	1.48717	0.692739	0.289413		0.981865	0.223513	0.132885	0.15907	0.998801	0.532865	0.029189		0.2585	0.491987	0.543496	0.771127	0.419924	0.673669	0.221203	0.341468	0.326647		0.477633	0.860873	0.950694	0.60768	0.102555	0.425939	0.475204	0.572656
	0.2595	1.27547	0.560503	0.603453	0.662876	1.48717	0.69258	0.289413		0.981865	0.223513	0.132885	0.15907	0.998801	0.564113	0.029189		0.2595	0.482221	0.543496	0.771127	0.419924	0.673669	0.221203	0.341468	0.326647		0.410362	0.949919	0.927425	0.412969	0.110033	0.432134	0.475204	0.567461
	0.2605	1.27547	0.560503	0.603453	0.662876	1.47415	0.69258	0.289413		0.981865	0.223513	0.132885	0.15907	1.01664	0.509344	0.029189		0.2605	0.482221	0.530271	0.771127	0.419924	0.615643	0.2304	0.341468	0.334533		0.410362	0.949919	0.930781	0.409205	0.110033	0.438622	0.507897	0.567461
	0.2615	1.18868	0.560503	0.702195	0.662876	1.481	0.69258	0.30978		0.981865	0.223513	0.132885	0.144765	1.01664	0.509344	0.029189		0.2615	0.482221	0.530271	0.756473	0.424236	0.615643	0.238473	0.38207	0.345192		0.410362	1.00471	0.930781	0.409205	0.110033	0.470053	0.494365	0.633485
	0.2625	1.18868	0.633888	0.702195	0.662876	1.481	0.6547	0.30978		0.986402	0.223513	0.132885	0.144765	1.00195	0.509344	0.029189		0.2625	0.482221	0.552384	0.783129	0.424236	0.615643	0.211325	0.392524	0.345192		0.410362	0.860928	0.930781	0.401334	0.110033	0.470053	0.494365	0.633485
	0.2635	1.18868	0.633888	0.702195	0.662876	1.48698	0.657576	0.322685		1.0562	0.223513	0.132885	0.144765	1.00195	0.515242	0.029189		0.2635	0.470436	0.572696	0.783129	0.416498	0.615643	0.208984	0.392524	0.356115		0.410362	0.889565	0.930781	0.401334	0.110033	0.470053	0.494365	0.637616
	0.2645	1.18868	0.633888	0.702195	0.662876	1.48698	0.661841	0.322685		1.37494	0.223513	0.132885	0.144765	0.979044	0.502883	0.029189		0.2645	0.470436	0.572696	0.791389	0.407039	0.615643	0.208984	0.392524	0.359572		0.410362	0.889565	0.994856	0.431449	0.110033	0.460489	0.52124	0.662141
	0.2655	1.17702	0.633888	0.702195	0.662876	1.51874	0.666404	0.327667		1.37494	0.223513	0.132885	0.144765	0.979044	0.502883	0.029189		0.2655	0.470436	0.572696	0.791389	0.407039	0.615643	0.208984	0.379582	0.355263		0.410362	0.884787	0.885209	0.431449	0.110033	0.460489	0.52124	0.662141
	0.2665	1.09723	0.633888	0.830205	0.662876	1.92733	0.66128	0.327667		1.37494	0.223513	0.132885	0.144765	0.928021	0.502883	0.029189		0.2665	0.470436	0.566428	0.770646	0.424655	0.662441	0.208984	0.379582	0.355263		0.410362	0.884787	0.874167	0.519831	0.110033	0.460489	0.52124	0.701978
	0.2675	1.09723	0.633888	0.830205	0.719572	1.9191	0.66128	0.327667		1.37494	0.146914	0.132885	0.144765	0.928021	0.465392	0.029189		0.2675	0.470436	0.534324	0.783944	0.424655	0.753998	0.208984	0.379582	0.356131		0.467408	0.867113	0.89557	0.538744	0.110033	0.460489	0.5411	0.663529
	0.2685	1.09723	0.477195	0.830205	0.719572	1.90093	0.66128	0.327667		1.37494	0.146914	0.132885	0.144765	0.967895	0.465392	0.029189		0.2685	0.470436	0.534324	0.771276	0.430559	0.753998	0.215603	0.379582	0.356131		0.467408	0.89172	0.87537	0.520856	0.110033	0.449124	0.5411	0.663529
	0.2695	1.09723	0.477195	0.830205	0.719572	1.90093	0.684282	0.327667		1.37494	0.146914	0.132885	0.144765	0.967895	0.438676	0.029189		0.2695	0.470436	0.51423	0.771276	0.430559	0.753998	0.215603	0.379582	0.348927		0.458116	1.06042	0.863144	0.489396	0.110033	0.450652	0.5411	0.660623
	0.2705	1.09723	0.477195	0.830205	0.719572	1.64995	0.713757	0.327667		1.13655	0.146914	0.132885	0.144765	0.967895	0.438676	0.029189		0.2705	0.470436	0.51423	0.771276	0.430559	0.753998	0.215603	0.379582	0.350453		0.458116	1.10263	0.863144	0.508969	0.110033	0.486452	0.537292	0.667283
	0.2715	1.09723	0.477195	0.830205	0.719572	1.86008	0.732141	0.327667		1.13655	0.146914	0.132885	0.144765	0.935172	0.464688	0.029189		0.2715	0.470436	0.513455	0.794537	0.430243	0.783944	0.215603	0.379582	0.350453		0.458116	0.815723	0.863144	0.508969	0.110033	0.486452	0.537292	0.683774
	0.2725	1.09723	0.477195	0.830205	0.719572	1.7378	0.746952	0.327667		1.7386	0.146914	0.132885	0.144765	0.935172	0.464688	0.029189		0.2725	0.470436	0.513455	0.823412	0.430243	0.598097	0.215603	0.379582	0.350453		0.458116	0.815723	0.863144	0.402305	0.110033	0.569327	0.537292	0.683774
	0.2735	1.1531	0.482016	0.830205	0.719572	1.68043	0.746952	0.327667		1.7386	0.146914	0.132885	0.144765	0.93108	0.462835	0.029189		0.2735	0.493159	0.540743	0.823412	0.430243	0.657474	0.215603	0.390871	0.351946		0.458116	0.775763	0.865888	0.421653	0.110033	0.569327	0.537292	0.683774
	0.2745	1.1883	0.566807	0.830205	0.719572	1.66914	0.746952	0.327667		1.63523	0.146914	0.132885	0.144765	0.977184	0.462835	0.029189		0.2745	0.523221	0.514759	0.828499	0.430243	0.657474	0.215603	0.409849	0.376643		0.495098	0.772111	0.877342	0.420722	0.110033	0.569327	0.552197	0.683774
	0.2755	1.1883	0.566807	0.830205	0.719572	1.65288	0.744205	0.329708		1.63523	0.146914	0.132885	0.144765	0.993692	0.462835	0.029189		0.2755	0.523221	0.514759	0.828499	0.430243	0.657474	0.254937	0.406997	0.376347		0.495098	0.742592	0.856151	0.420722	0.110033	0.615942	0.559978	0.678281
	0.2765	1.1883	0.566807	0.830205	0.719572	1.39207	0.747234	0.343563		1.75436	0.146914	0.336403	0.144765	1.07247	0.556562	0.029189		0.2765	0.523221	0.657542	0.828499	0.430243	0.657474	0.254937	0.379101	0.3768		0.497265	0.742592	0.856151	0.465747	0.110033	0.615942	0.55027	0.718776
	0.2775	1.15719	0.630312	0.830205	0.733665	1.46513	0.747234	0.343563		1.89833	0.146914	0.336403	0.144765	1.00352	0.556562	0.029189		0.2775	0.523221	0.665173	0.833981	0.430904	0.657474	0.254937	0.379101	0.361581		0.497265	0.780999	0.856151	0.455249	0.110033	0.625717	0.555935	0.718776
	0.2785	1.15719	0.630312	0.830205	0.733665	1.4845	0.747234	0.343563		1.89833	0.182923	0.336403	0.144765	1.00352	0.556562	0.029189		0.2785	0.523221	0.665173	0.805043	0.430904	0.657474	0.254937	0.378497	0.349282		0.497265	0.780999	0.856151	0.433758	0.110033	0.638746	0.546116	0.71386
	0.2795	1.15719	0.630312	0.830205	0.733665	1.4941	0.764419	0.343563		1.89833	0.182923	0.336403	0.144765	0.975434	0.556562	0.029189		0.2795	0.523221	0.665173	0.805043	0.430904	0.657474	0.254937	0.378497	0.349282		0.463936	0.671054	0.936375	0.433758	0.110033	0.644328	0.536903	0.71386
	0.2805	1.15719	0.630312	0.830205	0.733665	1.4941	0.764419	0.343563		1.89833	0.182923	0.336403	0.144765	0.975434	0.565561	0.029189		0.2805	0.523221	0.554432	0.805043	0.443123	0.657474	0.254937	0.378497	0.349282		0.471911	0.675401	0.947	0.520571	0.110033	0.642394	0.599365	0.71386
	0.2815	1.14298	0.630312	0.830205	0.713842	1.49577	0.764419	0.343563		1.24231	0.182923	0.336403	0.144765	0.975434	0.540653	0.031526		0.2815	0.523221	0.554432	0.805043	0.363756	0.657474	0.254937	0.396805	0.349282		0.471911	0.675401	0.968191	0.576109	0.110033	0.543903	0.599365	0.714991
	0.2825	1.14298	0.630312	0.830205	0.713842	1.54231	0.764419	0.343563		1.22001	0.182923	0.336403	0.144765	0.975434	0.553996	0.031526		0.2825	0.523221	0.588663	0.814017	0.381899	0.657474	0.254937	0.396805	0.357003		0.474322	0.718402	0.90232	0.571691	0.110033	0.543903	0.603516	0.735651
	0.2835	1.14298	0.630312	0.830205	0.696879	1.55401	0.756433	0.343563		1.22001	0.182923	0.336403	0.144765	0.934395	0.553996	0.031526		0.2835	0.523221	0.588663	0.817344	0.381899	0.462735	0.254937	0.401911	0.357184		0.474322	0.72459	0.905711	0.602334	0.110033	0.572294	0.671312	0.690805
	0.2845	1.14298	0.630312	0.830205	0.696879	1.56184	0.756433	0.343563		1.08104	0.182923	0.336403	0.144765	0.934395	0.553996	0.031526		0.2845	0.582861	0.588663	0.803993	0.390242	0.462735	0.254937	0.404727	0.342827		0.540395	0.72459	0.878323	0.665549	0.110033	0.572294	0.671312	0.728271
	0.2855	1.14298	0.630312	0.830205	0.696879	1.58156	0.742223	0.343563		1.08104	0.182923	0.336403	0.144765	0.90987	0.532377	0.031526		0.2855	0.582861	0.588663	0.768884	0.390242	0.446852	0.254937	0.404727	0.348569		0.540395	0.727478	0.991225	0.510202	0.110033	0.572294	0.671312	0.752284
	0.2865	1.10436	0.520093	0.830205	0.696879	1.58649	0.74659	0.343563		1.04538	0.231307	0.336403	0.144765	0.90987	0.532377	0.031526		0.2865	0.582861	0.588663	0.773162	0.390242	0.446852	0.254937	0.427757	0.348569		0.540395	0.672274	0.983168	0.510202	0.110033	0.541218	0.620803	0.731899
	0.2875	1.17121	0.520093	0.830205	0.696879	1.58649	0.75001	0.343563		1.04538	0.231307	0.336403	0.144765	0.90987	0.532377	0.031526		0.2875	0.575831	0.588663	0.773162	0.395649	0.446852	0.254937	0.427757	0.356852		0.540395	0.670896	0.979193	0.481537	0.110033	0.541218	0.627248	0.74414
	0.2885	1.13883	0.520093	0.830205	0.696879	1.56907	0.75001	0.325448		1.03474	0.231307	0.336403	0.144765	0.90987	0.505758	0.031526		0.2885	0.575831	0.571909	0.793115	0.398988	0.446852	0.255185	0.427757	0.356852		0.540395	0.670896	0.979193	0.481537	0.110033	0.541218	0.584941	0.770663
	0.2895	1.16144	0.458617	0.830205	0.696879	1.6342	0.75001	0.325448		1.03474	0.231307	0.336403	0.144765	0.943064	0.505758	0.031526		0.2895	0.575831	0.571909	0.793115	0.398988	0.473688	0.255185	0.44548	0.402134		0.543945	0.670896	0.979193	0.516827	0.110033	0.535335	0.521702	0.743502
	0.2905	1.10691	0.458617	0.830205	0.696879	1.55979	0.75001	0.325448		1.03474	0.231307	0.336403	0.144765	0.980723	0.456452	0.031526		0.2905	0.575831	0.571909	0.793115	0.398988	0.473688	0.255185	0.44548	0.39461		0.543945	0.670896	0.979193	0.516827	0.110033	0.535335	0.521702	0.743502
	0.2915	1.07187	0.458617	1.10603	0.696879	1.58771	0.737226	0.325448		1.03474	0.231307	0.278763	0.134998	1.0169	0.456452	0.031526		0.2915	0.575831	0.538148	0.793115	0.396387	0.473688	0.261471	0.449576	0.393846		0.543945	0.575504	0.979193	0.503281	0.110033	0.535335	0.521702	0.743502
	0.2925	1.07187	0.374789	1.11718	0.696879	1.60577	0.745452	0.325448		1.03474	0.231307	0.278763	0.134998	1.0169	0.456452	0.031526		0.2925	0.575831	0.547029	0.787233	0.399365	0.473688	0.286855	0.449576	0.396546		0.467228	0.575504	1.01307	0.503281	0.110033	0.525478	0.525567	0.651465
	0.2935	1.07187	0.276257	1.11718	0.709128	1.56347	0.745452	0.325448		1.03474	0.231307	0.278763	0.134998	0.999186	0.456452	0.031526		0.2935	0.566269	0.547029	0.793736	0.405115	0.473688	0.346368	0.449576	0.396546		0.467228	0.751092	0.888214	0.495379	0.110033	0.525478	0.525567	0.651465
	0.2945	1.07187	0.276257	1.18009	0.709128	1.57971	0.736484	0.325448		0.988513	0.258217	0.278763	0.134998	0.99269	0.456452	0.031526		0.2945	0.566269	0.547029	0.789443	0.405115	0.473688	0.346368	0.449576	0.424261		0.467228	0.751092	0.888214	0.448695	0.110033	0.496303	0.525567	0.624265
	0.2955	1.06781	0.276257	1.18009	0.709128	1.57971	0.73242	0.325448		0.988513	0.258217	0.278763	0.134998	0.99269	0.456452	0.031526		0.2955	0.566269	0.547029	0.799456	0.405115	0.412644	0.346368	0.432471	0.424261		0.467228	0.876005	0.888214	0.448695	0.110033	0.484301	0.525567	0.624265
	0.2965	1.06781	0.276257	1.18009	0.709128	1.68446	0.73242	0.34154		0.988513	0.258217	0.278763	0.166198	0.961771	0.423537	0.031526		0.2965	0.566269	0.547029	0.835464	0.405115	0.412644	0.346368	0.432471	0.425538		0.528594	0.876005	0.933959	0.455526	0.110033	0.484301	0.525567	0.624265
	0.2975	1.06781	0.316176	1.18009	0.709128	1.71531	0.714506	0.34154		0.988513	0.258217	0.278763	0.166198	0.995751	0.489092	0.031526		0.2975	0.562402	0.504643	0.839022	0.405115	0.412644	0.369691	0.432471	0.425538		0.528594	0.767733	0.900365	0.380822	0.110033	0.484301	0.525567	0.625009
	0.2985	1.06781	0.316176	1.18009	0.709128	1.71531	0.71269	0.34154		0.988513	0.258217	0.278763	0.168816	0.995751	0.458132	0.031526		0.2985	0.562402	0.504835	0.839022	0.405115	0.420375	0.369691	0.432471	0.425538		0.484002	0.846195	1.03296	0.356811	0.110033	0.484301	0.525567	0.64758
	0.2995	1.06781	0.316176	1.18009	0.709128	1.76172	0.71269	0.368852		1.26387	0.258217	0.278763	0.168816	0.995751	0.498364	0.031526		0.2995	0.562402	0.512354	0.840336	0.405115	0.420375	0.369691	0.432471	0.409385		0.510795	0.887393	1.03296	0.393921	0.110033	0.484301	0.526389	0.631668
	0.3005	1.06781	0.316176	1.18009	0.709128	1.76172	0.71269	0.368852		1.26387	0.258217	0.278763	0.19592	0.995751	0.498364	0.031526		0.3005	0.562402	0.517807	0.840336	0.397065	0.420375	0.369691	0.432471	0.447938		0.510795	0.890301	1.01605	0.393921	0.110033	0.463834	0.526389	0.651376
	0.3015	1.07342	0.316176	1.18009	0.709128	1.76891	0.723492	0.349255		1.26387	0.258217	0.278763	0.19592	0.989637	0.498364	0.031526		0.3015	0.562402	0.517354	0.840336	0.397065	0.420375	0.369691	0.432471	0.440392		0.510795	0.865551	1.05158	0.387542	0.110033	0.463834	0.526389	0.648651
	0.3025	1.07342	0.316176	1.18009	0.709128	1.76198	0.697919	0.349255		1.22887	0.258217	0.278763	0.19592	0.96384	0.498364	0.031526		0.3025	0.562402	0.509853	0.840336	0.410249	0.420375	0.386447	0.432471	0.442887		0.510795	0.85053	1.05158	0.387542	0.110033	0.409648	0.526389	0.630632
	0.3035	1.07342	0.316176	1.30436	0.709128	1.76198	0.697919	0.349255		1.24543	0.28995	0.278763	0.19592	0.96384	0.498364	0.031526		0.3035	0.562402	0.509853	0.813258	0.410249	0.420375	0.34872	0.432471	0.442887		0.510795	0.85053	1.05158	0.410158	0.110033	0.409648	0.511962	0.630632
	0.3045	1.07342	0.316176	1.30436	0.709128	1.69088	0.691823	0.361466		1.24543	0.28995	0.278763	0.19592	0.96384	0.44403	0.031526		0.3045	0.488264	0.509853	0.795689	0.410249	0.442026	0.34872	0.441043	0.442887		0.536871	0.941103	1.02741	0.446687	0.110033	0.413584	0.474987	0.630632
	0.3055	1.08434	0.316176	1.30436	0.628536	1.5854	0.717668	0.361466		1.34669	0.325135	0.278763	0.19592	0.99131	0.474132	0.031526		0.3055	0.488264	0.509853	0.795689	0.410249	0.442026	0.34872	0.441043	0.397672		0.560293	0.889	0.981079	0.446687	0.110033	0.413584	0.507058	0.630632
	0.3065	1.06186	0.316176	1.30436	0.628536	1.59914	0.746485	0.361466		1.34669	0.394895	0.278763	0.19592	1.00292	0.474132	0.031526		0.3065	0.488264	0.51747	0.791881	0.416311	0.496964	0.34872	0.441043	0.324676		0.560293	0.952424	0.981079	0.474218	0.110033	0.440173	0.573618	0.643493
	0.3075	1.06186	0.316176	1.30436	0.628536	1.56058	0.746485	0.361466		1.34669	0.394895	0.278763	0.19592	1.01569	0.484046	0.031526		0.3075	0.488264	0.51747	0.789701	0.419624	0.496964	0.34872	0.441043	0.324676		0.560293	0.957813	0.981079	0.500709	0.110033	0.438428	0.573618	0.621054
	0.3085	1.06186	0.316176	1.30436	0.628536	1.56241	0.746485	0.361466		1.34669	0.394895	0.278763	0.195166	1.01569	0.484046	0.031526		0.3085	0.488264	0.511983	0.810305	0.419624	0.496964	0.34872	0.510889	0.331213		0.558609	0.957813	0.948791	0.500709	0.110033	0.445185	0.573618	0.634807
	0.3095	1.06186	0.308286	1.30436	0.628536	1.5352	0.746485	0.361466		1.091	0.394895	0.278763	0.193305	1.01919	0.484046	0.031526		0.3095	0.467803	0.507382	0.810266	0.419624	0.496964	0.337669	0.489879	0.367732		0.558609	0.979207	0.950057	0.39425	0.110033	0.445185	0.636697	0.634807
	0.3105	1.06186	0.308286	1.04004	0.628536	1.52026	0.765752	0.361466		1.091	0.335711	0.259723	0.193305	1.00957	0.49986	0.031526		0.3105	0.467803	0.54343	0.8154	0.432273	0.496964	0.337669	0.486664	0.373034		0.578578	0.77797	0.927648	0.39425	0.110033	0.448583	0.632897	0.657039
	0.3115	1.0144	0.325136	0.960711	0.628536	1.52026	0.765752	0.361466		1.091	0.335711	0.146171	0.193305	1.00957	0.49986	0.031526		0.3115	0.467803	0.54343	0.797146	0.432273	0.496964	0.337669	0.486664	0.376734		0.512121	0.817465	0.927648	0.374039	0.110033	0.448583	0.632897	0.667338
	0.3125	1.0144	0.325136	0.960711	0.625576	1.52026	0.795875	0.361466		1.08995	0.335711	0.146171	0.193305	0.990553	0.5006	0.031526		0.3125	0.467803	0.567773	0.797541	0.432273	0.496964	0.337669	0.486664	0.376734		0.574775	0.689121	1.00983	0.369317	0.110033	0.448583	0.615412	0.657644
	0.3135	1.0144	0.316934	0.960711	0.625576	1.52026	0.795875	0.361466		1.08995	0.335711	0.146171	0.193305	0.965741	0.444329	0.031526		0.3135	0.467803	0.567773	0.802851	0.437366	0.496964	0.337669	0.486664	0.376734		0.574775	0.689121	1.05858	0.369317	0.110033	0.424993	0.615412	0.672417
	0.3145	1.0144	0.316934	0.960711	0.625576	1.47645	0.792308	0.361466		1.08995	0.341843	0.146171	0.193305	0.965741	0.444329	0.031526		0.3145	0.467803	0.620713	0.802851	0.446987	0.496964	0.337669	0.486664	0.395362		0.574775	0.614024	1.08069	0.369317	0.110033	0.425573	0.63703	0.672417
	0.3155	1.0144	0.316934	0.960711	0.625576	1.51292	0.792308	0.361466		1.08995	0.308002	0.146171	0.193305	0.965741	0.394096	0.031526		0.3155	0.467803	0.609143	0.806312	0.446987	0.496964	0.351353	0.486664	0.407057		0.574775	0.614024	1.05988	0.416079	0.110033	0.425573	0.63703	0.672417
	0.3165	1.0144	0.316934	0.779885	0.625576	1.50777	0.783747	0.361466		1.08995	0.308002	0.146171	0.193305	0.966956	0.395546	0.031526		0.3165	0.467803	0.596982	0.814813	0.45038	0.496964	0.351353	0.40936	0.401751		0.574775	0.644887	1.05157	0.445246	0.110033	0.425573	0.63703	0.657564
	0.3175	1.0144	0.316934	0.779885	0.625576	1.49953	0.756727	0.361466		0.967158	0.308002	0.146171	0.193305	0.966956	0.395546	0.031526		0.3175	0.467803	0.596982	0.814813	0.452109	0.496964	0.351353	0.40936	0.401751		0.574775	0.60607	1.06692	0.445246	0.110033	0.425573	0.63703	0.657564
	0.3185	1.02886	0.316934	0.779885	0.625576	1.5327	0.756727	0.361466		0.872079	0.308002	0.146171	0.193305	0.966956	0.395546	0.031526		0.3185	0.479578	0.596982	0.801102	0.4691	0.496964	0.404829	0.40936	0.388081		0.591551	0.594971	1.06692	0.430441	0.110033	0.425573	0.647673	0.669219
	0.3195	1.0152	0.316934	0.779885	0.625576	1.62466	0.715253	0.361466		0.872079	0.308002	0.146171	0.193305	0.966956	0.395546	0.031526		0.3195	0.479578	0.58235	0.806603	0.4691	0.378091	0.404829	0.40936	0.388081		0.591551	0.594971	1.08436	0.430441	0.110033	0.425573	0.659958	0.658803
	0.3205	1.00977	0.316934	0.779885	0.625576	1.58232	0.715253	0.361466		0.872079	0.343475	0.146171	0.193305	0.952559	0.395546	0.031526		0.3205	0.479578	0.58235	0.806603	0.4691	0.383985	0.460035	0.42902	0.401099		0.591551	0.603885	1.08436	0.430441	0.110033	0.438484	0.655692	0.665886
	0.3215	1.00977	0.316934	0.779885	0.625576	1.58232	0.692884	0.380493		0.872079	0.343475	0.146171	0.193305	0.906935	0.395546	0.031526		0.3215	0.478257	0.626644	0.798018	0.4691	0.425443	0.460035	0.428036	0.401099		0.591551	0.710559	1.0989	0.425944	0.110033	0.438484	0.655692	0.679402
	0.3225	1.00977	0.316934	0.779885	0.625576	1.61548	0.661613	0.380493		0.872079	0.343475	0.146171	0.193305	0.881845	0.44796	0.031526		0.3225	0.478257	0.626644	0.798018	0.4691	0.425443	0.460035	0.428036	0.401099		0.622142	0.705778	1.0989	0.425944	0.110033	0.438484	0.655692	0.679402
	0.3235	1.00977	0.227434	0.779885	0.626848	1.61548	0.659796	0.380493		0.86519	0.37321	0.146171	0.193305	0.881845	0.44796	0.031526		0.3235	0.478257	0.626644	0.783382	0.468047	0.425443	0.460035	0.428036	0.401099		0.510321	0.691311	1.08465	0.402557	0.110033	0.424805	0.653339	0.696268
	0.3245	1.01115	0.227434	0.779885	0.626848	1.83423	0.659796	0.380493		0.818469	0.329551	0.146171	0.193305	0.913535	0.44796	0.031526		0.3245	0.478257	0.626644	0.783382	0.475139	0.425443	0.457226	0.428036	0.427756		0.511436	0.554487	1.06603	0.402557	0.110033	0.476485	0.702633	0.695657
	0.3255	1.01115	0.227434	0.779885	0.626848	1.83423	0.667725	0.380493		0.818469	0.329551	0.146171	0.193305	0.913535	0.44796	0.031526		0.3255	0.478257	0.626644	0.783382	0.456026	0.502945	0.473387	0.469948	0.426791		0.511436	0.554487	1.06603	0.428038	0.110033	0.476485	0.702633	0.695657
	0.3265	0.999407	0.227434	0.779885	0.601689	1.74133	0.652962	0.380493		0.818469	0.329551	0.146171	0.193305	0.941149	0.515848	0.031526		0.3265	0.478257	0.646156	0.783382	0.456026	0.637932	0.463154	0.469948	0.435158		0.522848	0.571056	1.06933	0.548981	0.110033	0.514902	0.87532	0.695657
	0.3275	0.999407	0.227434	0.709535	0.601689	1.79083	0.661688	0.380493		0.818469	0.329551	0.146171	0.193305	0.985368	0.515848	0.031526		0.3275	0.478257	0.646156	0.788063	0.456026	0.637932	0.477977	0.469222	0.376503		0.522848	0.571056	1.0539	0.504061	0.110033	0.527156	0.87532	0.677303
	0.3285	0.999407	0.227434	0.709535	0.601689	1.80341	0.661688	0.380493		0.818469	0.329551	0.146171	0.193305	0.985368	0.515848	0.031526		0.3285	0.478257	0.583589	0.788063	0.456026	0.637932	0.477977	0.441494	0.364994		0.522848	0.552312	1.06563	0.504061	0.110033	0.527156	0.592881	0.715499
	0.3295	0.999407	0.227434	0.709535	0.595303	1.82284	0.662945	0.372417		0.949766	0.225599	0.146171	0.193305	0.991417	0.503516	0.031526		0.3295	0.478257	0.624234	0.806219	0.474087	0.637932	0.451557	0.461964	0.371252		0.520798	0.568865	1.05424	0.49626	0.110033	0.527156	0.592881	0.688924
	0.3305	1.07891	0.287158	0.709535	0.595303	1.82284	0.638343	0.372417		0.949766	0.225599	0.146171	0.193305	0.991417	0.503516	0.031526		0.3305	0.478257	0.610324	0.799888	0.474087	0.637932	0.366894	0.461964	0.368581		0.566171	0.613584	1.05424	0.520956	0.110033	0.543322	0.52434	0.697455
	0.3315	1.07891	0.287158	0.709535	0.592179	1.78124	0.64829	0.372417		0.889845	0.225599	0.146171	0.193305	0.991417	0.503516	0.031526		0.3315	0.478257	0.610324	0.799888	0.490402	0.637932	0.366894	0.46911	0.367351		0.566171	0.613584	1.05424	0.520956	0.110033	0.543322	0.511634	0.697455
	0.3325	1.07891	0.287158	0.70069	0.592179	1.74481	0.64829	0.372417		0.889845	0.225599	0.146171	0.193305	0.995232	0.497735	0.031526		0.3325	0.478257	0.629582	0.799888	0.490402	0.637932	0.378587	0.478258	0.370017		0.566171	0.613584	1.03778	0.530904	0.110033	0.543322	0.511634	0.700526
	0.3335	1.07891	0.287158	0.70069	0.592179	1.61193	0.651333	0.372417		0.889845	0.225599	0.146171	0.193305	0.995232	0.473383	0.031526		0.3335	0.478257	0.627994	0.8223	0.493411	0.637932	0.282496	0.478258	0.370017		0.566171	0.629525	1.03778	0.524286	0.155438	0.523141	0.511634	0.688808
	0.3345	1.07891	0.287158	0.70069	0.58026	1.61193	0.651333	0.372417		0.889845	0.225599	0.146171	0.193305	1.01668	0.473383	0.031526		0.3345	0.478257	0.627994	0.8223	0.493411	0.637932	0.282496	0.478258	0.370017		0.566171	0.635722	0.944068	0.542927	0.407086	0.521685	0.511634	0.688808
	0.3355	1.07891	0.287158	0.70069	0.577241	1.5766	0.668834	0.377384		0.889845	0.225599	0.146171	0.193305	1.01668	0.491134	0.031526		0.3355	0.482497	0.629163	0.8223	0.499055	0.637932	0.282496	0.478258	0.370017		0.566171	0.565978	0.969397	0.485847	0.407086	0.521685	0.487212	0.722647
	0.3365	1.07891	0.287158	0.70069	0.630043	1.5766	0.677405	0.377384		0.889845	0.225599	0.146171	0.193305	1.00783	0.491134	0.031526		0.3365	0.482497	0.629163	0.812325	0.499055	0.637932	0.282496	0.499565	0.360174		0.566916	0.565978	1.00083	0.491378	0.407086	0.648501	0.489817	0.722647
	0.3375	1.07891	0.287158	0.70069	0.630043	1.5766	0.677405	0.383473		0.889845	0.225599	0.146171	0.193305	1.00783	0.491134	0.031526		0.3375	0.482497	0.629163	0.822184	0.501495	0.578266	0.282496	0.499565	0.361908		0.552146	0.461166	1.00083	0.491378	0.407086	0.648501	0.489817	0.709892
	0.3385	1.07891	0.287158	0.70069	0.630043	1.91026	0.674015	0.383473		0.871345	0.225599	0.146171	0.193305	1.00783	0.491134	0.031526		0.3385	0.482497	0.670031	0.839344	0.506814	0.578266	0.282496	0.499565	0.361764		0.552146	0.386525	1.00083	0.531017	0.407086	0.628685	0.489817	0.742835
	0.3395	1.09992	0.287158	0.70069	0.624904	1.91026	0.681824	0.383473		0.871345	0.225599	0.146171	0.193305	1.00783	0.491134	0.031526		0.3395	0.482497	0.670031	0.839344	0.506814	0.578266	0.282496	0.499565	0.361764		0.537434	0.386525	1.01226	0.517039	0.407086	0.59652	0.489817	0.742835
	0.3405	1.09992	0.287158	0.70069	0.624904	2.04614	0.687195	0.383473		0.871345	0.182474	0.146171	0.193305	1.04147	0.483058	0.031526		0.3405	0.482497	0.670031	0.829156	0.512125	0.578266	0.282496	0.480034	0.361764		0.537434	0.386525	1.01226	0.547112	0.407086	0.59652	0.489817	0.769958
	0.3415	1.09661	0.287158	0.70069	0.624904	2.03674	0.687195	0.383473		0.871345	0.182474	0.146171	0.193305	1.05809	0.483058	0.031526		0.3415	0.482497	0.671111	0.829156	0.511864	0.578266	0.282496	0.46683	0.361764		0.537434	0.386525	1.00493	0.498355	0.407086	0.59652	0.488682	0.769958
	0.3425	1.09661	0.287158	0.70069	0.648169	1.87758	0.687195	0.383473		0.871345	0.182474	0.146171	0.193305	1.12072	0.483058	0.031526		0.3425	0.482497	0.647082	0.816416	0.510386	0.578266	0.282496	0.49296	0.361764		0.610592	0.399415	1.00493	0.564927	0.407086	0.59652	0.494322	0.764609
	0.3435	1.09661	0.287158	0.70069	0.648169	1.86439	0.687195	0.383473		0.871345	0.263525	0.146171	0.193305	1.13082	0.483058	0.031526		0.3435	0.482497	0.647082	0.813664	0.510386	0.578266	0.282496	0.49296	0.361764		0.610592	0.399415	0.984296	0.586314	0.407086	0.59652	0.548106	0.758432
	0.3445	1.10931	0.287158	0.70069	0.648169	1.69138	0.687195	0.383473		0.871345	0.361387	0.146171	0.193305	1.13082	0.483058	0.031526		0.3445	0.498969	0.641181	0.813664	0.521203	0.5704	0.282496	0.49296	0.360585		0.610592	0.399415	0.984296	0.567717	0.407086	0.559776	0.548106	0.753314
	0.3455	1.10931	0.287158	0.70069	0.637982	1.53347	0.687195	0.383473		0.918541	0.373634	0.146171	0.193305	1.18419	0.483058	0.031526		0.3455	0.498969	0.629372	0.813664	0.520981	0.5704	0.282496	0.49296	0.369804		0.610592	0.399415	0.943971	0.530883	0.407086	0.539867	0.548106	0.74003
	0.3465	1.10931	0.287158	0.70069	0.637982	1.53347	0.687195	0.406592		0.918541	0.373634	0.146171	0.193305	1.18419	0.516791	0.031526		0.3465	0.498969	0.628123	0.826565	0.528617	0.5704	0.282496	0.495971	0.369804		0.58316	0.326046	0.953424	0.530883	0.428594	0.539867	0.567423	0.745482
	0.3475	1.10931	0.287158	0.70069	0.637982	1.55054	0.682882	0.406592		0.731862	0.373634	0.146171	0.193305	1.18419	0.522067	0.031526		0.3475	0.498969	0.603505	0.89154	0.528617	0.5704	0.282496	0.533329	0.369804		0.622526	0.326046	0.910585	0.554874	0.709577	0.545851	0.567423	0.745482
	0.3485	1.10931	0.287158	0.70069	0.637982	1.55054	0.71604	0.406592		0.731862	0.400638	0.146171	0.193305	1.06561	0.522067	0.031526		0.3485	0.498969	0.62137	0.89154	0.528617	0.625945	0.282496	0.533329	0.374607		0.601108	0.359327	0.910585	0.502516	0.68076	0.573552	0.613284	0.745482
	0.3495	1.1104	0.287158	0.70069	0.637982	1.53674	0.71604	0.406592		0.731862	0.400638	0.146171	0.193305	1.06118	0.576066	0.031526		0.3495	0.498969	0.628164	0.862264	0.525567	0.625945	0.282496	0.536092	0.374607		0.601108	0.359327	0.910585	0.502516	0.68076	0.573552	0.628192	0.738597
	0.3505	1.1265	0.281968	0.70069	0.637982	1.53674	0.71604	0.406592		0.904545	0.398662	0.146171	0.207917	1.06118	0.576066	0.031526		0.3505	0.498969	0.628164	0.862264	0.525567	0.625945	0.293619	0.536092	0.373281		0.601108	0.348864	0.910585	0.515173	0.68076	0.533789	0.628192	0.738597
	0.3515	1.1265	0.281968	0.70069	0.693533	1.53674	0.706753	0.406592		0.897272	0.465882	0.146171	0.207917	1.03333	0.522845	0.031526		0.3515	0.501944	0.645795	0.889532	0.527788	0.625945	0.311891	0.536092	0.373124		0.5673	0.346857	0.88719	0.515173	0.68076	0.551526	0.643152	0.738597
	0.3525	1.1265	0.281968	0.70069	0.693533	1.56082	0.715076	0.406592		0.910645	0.465882	0.146171	0.207917	1.03333	0.522845	0.031526		0.3525	0.545173	0.645795	0.910158	0.527788	0.625945	0.311891	0.536092	0.386979		0.5673	0.354605	0.945734	0.541584	0.68076	0.55624	0.643152	0.764906
	0.3535	1.1265	0.281968	0.70069	0.693533	1.60778	0.713342	0.406592		0.910645	0.465882	0.146171	0.207917	1.02147	0.522845	0.031526		0.3535	0.562735	0.645795	0.92093	0.527788	0.625945	0.350871	0.555873	0.388976		0.5673	0.354605	0.945734	0.541584	0.68076	0.556822	0.637713	0.764906
	0.3545	1.1265	0.281968	0.70069	0.693533	1.62447	0.713342	0.406592		0.952435	0.465882	0.146171	0.207917	1.02147	0.504585	0.031526		0.3545	0.562735	0.698848	0.868656	0.517423	0.625945	0.350871	0.555873	0.388976		0.5673	0.354605	0.945734	0.516965	0.223612	0.556822	0.623555	0.764906
	0.3555	1.1265	0.271224	0.70069	0.693533	1.61957	0.709883	0.406592		0.952435	0.465882	0.146171	0.208505	0.98889	0.504585	0.031526		0.3555	0.562735	0.698848	0.859628	0.517423	0.625945	0.350871	0.555873	0.391224		0.5673	0.354605	0.945734	0.538575	0.223612	0.556822	0.623555	0.764906
	0.3565	1.1265	0.271224	0.70069	0.693533	1.61353	0.703475	0.406592		0.952435	0.398537	0.146171	0.208505	0.95605	0.504585	0.031526		0.3565	0.562735	0.698848	0.859628	0.525232	0.625945	0.3472	0.566168	0.394354		0.520889	0.354605	0.914638	0.512476	0.223612	0.556822	0.754283	0.757418
	0.3575	1.12141	0.271224	0.70069	0.693533	1.61353	0.703475	0.406592		0.952435	0.346073	0.146171	0.208505	0.95605	0.504585	0.031526		0.3575	0.562735	0.589976	0.924564	0.525232	0.625945	0.341147	0.566168	0.391037		0.520889	0.354605	0.923091	0.515333	0.223612	0.530507	0.754131	0.717158
	0.3585	1.09943	0.271224	0.70069	0.693533	1.67858	0.70561	0.406592		0.952435	0.346073	0.146171	0.208505	0.981941	0.565631	0.031526		0.3585	0.581206	0.589976	0.940997	0.525232	0.588708	0.341147	0.557478	0.391037		0.541576	0.334744	0.923091	0.499041	0.223612	0.474342	0.754131	0.74929
	0.3595	1.09943	0.271224	0.70069	0.693533	1.65009	0.698664	0.406592		0.952435	0.346073	0.146171	0.203327	0.981941	0.62846	0.031526		0.3595	0.581206	0.592845	0.940997	0.525232	0.588708	0.341147	0.557478	0.393016		0.541576	0.347327	0.923091	0.499041	0.223612	0.494428	0.754131	0.775757
	0.3605	1.09943	0.271224	0.70069	0.693533	1.80833	0.698664	0.406592		0.952435	0.377777	0.146171	0.203327	0.981941	0.544409	0.031526		0.3605	0.605998	0.596574	0.946861	0.502127	0.598288	0.341147	0.553889	0.396167		0.541576	0.39565	0.961497	0.504459	0.223612	0.55204	0.669521	0.775757
	0.3615	1.09943	0.231349	0.70069	0.693533	1.76534	0.713926	0.406592		0.952435	0.377777	0.146171	0.203327	0.981941	0.544409	0.031526		0.3615	0.605998	0.625105	0.946861	0.501869	0.598288	0.341147	0.572623	0.397412		0.549077	0.39565	0.974494	0.550037	0.223612	0.55204	0.669521	0.775757
	0.3625	1.09853	0.205245	0.70069	0.693533	1.76534	0.713926	0.406592		0.952435	0.496542	0.146171	0.203327	0.957595	0.544409	0.031526		0.3625	0.605998	0.625105	0.933837	0.501869	0.598288	0.341147	0.572623	0.388251		0.549077	0.405493	1.00083	0.550037	0.223612	0.55204	0.684666	0.673995
	0.3635	1.16006	0.205245	0.611817	0.693533	1.75276	0.713926	0.406592		0.888316	0.496542	0.146171	0.203327	0.957595	0.544409	0.031526		0.3635	0.605998	0.59542	0.899344	0.516046	0.598288	0.337727	0.572623	0.395501		0.549077	0.405493	1.00083	0.564951	0.223612	0.548481	0.695942	0.682303
	0.3645	1.16006	0.205245	0.611817	0.693533	1.60037	0.695469	0.419773		0.888316	0.496542	0.146171	0.203327	0.95785	0.520242	0.031526		0.3645	0.605998	0.59542	0.820261	0.516046	0.598288	0.337727	0.543012	0.402185		0.549077	0.405493	0.979592	0.562378	0.223612	0.548481	0.71083	0.682303
	0.3655	1.16006	0.205245	0.611817	0.693533	1.58419	0.680039	0.419773		0.916072	0.496542	0.146171	0.203327	1.00408	0.511346	0.031526		0.3655	0.605998	0.695226	0.820261	0.510548	0.505197	0.331257	0.543012	0.390643		0.55833	0.405493	0.979592	0.528662	0.223612	0.575516	0.756792	0.692964
	0.3665	1.14274	0.205245	0.611817	0.693533	1.56754	0.680039	0.419773		0.916072	0.496542	0.146171	0.203327	1.00408	0.511346	0.031526		0.3665	0.61323	0.69178	0.850509	0.510813	0.505197	0.362157	0.558422	0.390643		0.55833	0.431964	0.995483	0.52564	0.223612	0.575516	0.751521	0.702883
	0.3675	1.20028	0.205245	0.611817	0.693533	1.56189	0.696572	0.419773		1.08914	0.397785	0.165519	0.203327	1.00408	0.511346	0.031526		0.3675	0.595277	0.740209	0.850509	0.539411	0.505197	0.362157	0.558422	0.390643		0.55833	0.431964	0.995483	0.725267	0.223612	0.54841	0.751521	0.697404
	0.3685	1.20028	0.205245	0.611817	0.693533	1.51653	0.696572	0.419773		1.08914	0.439759	0.165519	0.203327	1.00125	0.511346	0.031526		0.3685	0.595277	0.720687	0.87309	0.54925	0.490628	0.362157	0.558422	0.390643		0.48838	0.434673	0.994861	0.770181	0.223612	0.54841	0.765428	0.697404
	0.3695	1.20028	0.205245	0.630241	0.693533	1.54353	0.694664	0.452526		1.08914	0.439759	0.165519	0.203327	1.00125	0.500285	0.031526		0.3695	0.595277	0.677209	0.87309	0.559423	0.490628	0.362157	0.558422	0.390643		0.452901	0.467357	0.994861	0.697192	0.223612	0.54841	0.791827	0.651151
	0.3705	1.20028	0.205245	0.630241	0.693533	1.58932	0.694664	0.452526		1.08914	0.439759	0.165519	0.203327	0.996899	0.500285	0.031526		0.3705	0.595277	0.677209	0.854409	0.559423	0.489516	0.362157	0.631528	0.390643		0.452901	0.467357	0.994407	0.625498	0.223612	0.591694	0.791827	0.651151
	0.3715	1.20028	0.205245	0.630241	0.70699	1.56791	0.694664	0.452526		1.08914	0.439759	0.165519	0.203327	0.996899	0.5124	0.031526		0.3715	0.595277	0.677209	0.900073	0.559423	0.573495	0.362157	0.631528	0.390643		0.452901	0.476561	0.994407	0.619005	0.223612	0.591957	0.791827	0.691644
	0.3725	1.22722	0.205245	0.630241	0.70699	1.56791	0.694664	0.452526		1.08914	0.439759	0.165519	0.203327	1.01772	0.5124	0.031526		0.3725	0.595277	0.71249	0.883502	0.559423	0.573495	0.362157	0.61861	0.396013		0.452901	0.51903	1.00608	0.635817	0.223612	0.591957	0.807612	0.691644
	0.3735	1.27964	0.216968	0.630241	0.70699	1.59464	0.695748	0.452526		1.12304	0.439759	0.165519	0.203327	1.01253	0.488276	0.031526		0.3735	0.595277	0.71249	0.875849	0.561786	0.573495	0.362157	0.618613	0.396013		0.452901	0.510927	1.00608	0.628473	0.223612	0.654623	0.807612	0.691644
	0.3745	1.27964	0.216968	0.630241	0.70699	1.59464	0.695748	0.452526		1.12304	0.439759	0.165519	0.203327	1.01253	0.507736	0.031526		0.3745	0.595277	0.682663	0.875849	0.561786	0.573495	0.386557	0.618613	0.398729		0.481596	0.510927	1.0334	0.604286	0.223612	0.654623	0.861792	0.691644
	0.3755	1.27964	0.216968	0.630241	0.70699	1.60386	0.695748	0.452526		1.12304	0.439759	0.165519	0.171454	1.01253	0.517137	0.031526		0.3755	0.614127	0.652295	0.849132	0.554533	0.573495	0.386557	0.628508	0.398729		0.481596	0.510927	1.05414	0.507892	0.223612	0.633724	0.793653	0.714369
	0.3765	1.2166	0.216968	0.630241	0.70699	1.6222	0.757298	0.452526		1.12304	0.439759	0.165519	0.171454	1.01253	0.517137	0.031526		0.3765	0.587581	0.654154	0.849806	0.555633	0.573495	0.386557	0.62502	0.398729		0.481596	0.546995	1.05414	0.519247	0.223612	0.576371	0.730489	0.752217
	0.3775	1.32247	0.216968	0.630241	0.70699	1.64555	0.744855	0.452526		1.12304	0.473887	0.165519	0.171454	1.01656	0.600141	0.031526		0.3775	0.587581	0.66855	0.849806	0.564162	0.573495	0.386557	0.62502	0.405371		0.481596	0.546995	0.952956	0.519247	0.357385	0.576371	0.721871	0.732392
	0.3785	1.32247	0.216968	0.630241	0.650269	1.64105	0.74706	0.452526		1.35704	0.473887	0.165519	0.171454	0.994554	0.600141	0.031526		0.3785	0.587581	0.665875	0.849806	0.564158	0.573495	0.338366	0.615774	0.407225		0.512433	0.546995	0.952956	0.558177	0.357385	0.576371	0.721871	0.732392
	0.3795	1.30415	0.216968	0.630241	0.650269	1.81086	0.74706	0.452526		1.35704	0.493526	0.165519	0.171454	0.994554	0.600141	0.031526		0.3795	0.587581	0.665875	0.849806	0.564158	0.573495	0.381308	0.615774	0.407225		0.512433	0.530527	0.937065	0.558177	0.357385	0.64868	0.720317	0.735904
	0.3805	1.30415	0.216968	0.630241	0.650269	1.80236	0.74706	0.452526		1.3456	0.493526	0.165519	0.171454	0.994554	0.600141	0.031526		0.3805	0.587581	0.665875	0.909959	0.564158	0.573495	0.381308	0.628897	0.407225		0.509659	0.530527	0.944323	0.560652	0.357385	0.673079	0.720317	0.695675
	0.3815	1.30496	0.216968	0.630241	0.650269	1.8075	0.74706	0.452526		1.57038	0.432684	0.165519	0.171454	0.989636	0.455004	0.031526		0.3815	0.587581	0.671687	0.93048	0.56225	0.573495	0.381308	0.552261	0.407656		0.495831	0.526116	0.867899	0.560652	0.554242	0.650571	0.701783	0.669849
	0.3825	1.30496	0.216968	0.630241	0.650269	1.79684	0.72416	0.458149		1.49415	0.432684	0.165519	0.171454	0.989636	0.455004	0.031526		0.3825	0.587581	0.621434	0.90091	0.535835	0.60933	0.381308	0.552261	0.403151		0.495831	0.569661	0.887264	0.575197	0.554242	0.650571	0.701783	0.669849
	0.3835	1.30496	0.216968	0.630241	0.650269	1.79684	0.72416	0.458149		1.41196	0.430549	0.165519	0.171454	1.03176	0.493758	0.031526		0.3835	0.587581	0.621434	0.90091	0.532886	0.60933	0.353247	0.552261	0.413208		0.501067	0.63551	0.937759	0.624656	0.554242	0.475055	0.701783	0.669849
	0.3845	1.30496	0.216968	0.630241	0.650269	1.73195	0.757239	0.453766		1.41196	0.462849	0.165519	0.171454	1.03903	0.493758	0.031526		0.3845	0.587581	0.630647	0.90091	0.528296	0.60933	0.365285	0.552261	0.413208		0.501067	0.65204	0.931074	0.566295	0.554242	0.475055	0.645041	0.674128
	0.3855	1.30496	0.216968	0.630241	0.650269	1.66322	0.752058	0.453766		1.41196	0.462849	0.165519	0.171454	1.02188	0.493758	0.031526		0.3855	0.587581	0.582067	0.90091	0.528296	0.60933	0.365285	0.542385	0.406164		0.501067	0.679005	0.895355	0.629809	0.691887	0.495776	0.645041	0.687433
	0.3865	1.30496	0.216968	0.630241	0.650269	1.78448	0.752058	0.453766		1.41196	0.462849	0.165519	0.164711	1.02028	0.487484	0.031526		0.3865	0.587581	0.582067	0.872166	0.528296	0.60933	0.370261	0.542385	0.403401		0.501067	0.650837	0.895355	0.61382	0.691887	0.495776	0.645041	0.687433
	0.3875	1.45379	0.216968	0.630241	0.645831	1.77002	0.752058	0.453766		1.28145	0.462849	0.165519	0.164711	1.0174	0.490306	0.031526		0.3875	0.587581	0.582067	0.852912	0.528296	0.79261	0.370261	0.542385	0.400244		0.501067	0.650837	0.895355	0.619321	1.40513	0.495776	0.672796	0.737618
	0.3885	1.45379	0.216968	0.578708	0.645831	1.77002	0.724809	0.453766		1.28145	0.462849	0.165519	0.164711	0.998455	0.490306	0.031526		0.3885	0.587581	0.584904	0.852912	0.535064	0.79261	0.370261	0.568974	0.399717		0.536795	0.621464	0.781213	0.619321	1.40513	0.507811	0.672796	0.758049
	0.3895	1.45379	0.216968	0.578708	0.647701	1.85763	0.724809	0.453766		1.28145	0.494038	0.165519	0.164711	0.998455	0.490306	0.031526		0.3895	0.587581	0.520957	0.852912	0.526283	0.79261	0.370261	0.568974	0.399717		0.536795	0.607957	0.767435	0.618018	1.24097	0.507811	0.685405	0.758049
	0.3905	1.45379	0.216968	0.578708	0.647701	1.85763	0.724809	0.453766		1.27367	0.42223	0.165519	0.164711	0.998455	0.514708	0.031526		0.3905	0.587581	0.520957	0.879536	0.526283	0.79261	0.379513	0.568974	0.391878		0.539088	0.607957	0.767435	0.672714	0.87932	0.451217	0.630641	0.747721
	0.3915	1.47218	0.216968	0.578708	0.647701	1.78456	0.724809	0.46649		1.27367	0.42223	0.165519	0.174499	0.996079	0.496044	0.031526		0.3915	0.587581	0.532545	0.879536	0.526283	0.79261	0.379513	0.568974	0.389133		0.539088	0.607957	0.767435	0.672714	0.34523	0.451217	0.651324	0.747721
	0.3925	1.47218	0.216968	0.578708	0.647701	1.77962	0.696771	0.46649		1.27367	0.42223	0.165519	0.174499	0.968819	0.496044	0.031526		0.3925	0.587581	0.532545	1.08042	0.515245	0.79261	0.379513	0.568974	0.389133		0.539088	0.693243	0.767435	0.630018	0.34523	0.50029	0.651324	0.767895
	0.3935	1.32337	0.216968	0.578708	0.647701	1.77962	0.694425	0.46649		1.31937	0.42223	0.165519	0.174499	0.958203	0.474866	0.031526		0.3935	0.587581	0.540864	1.08042	0.515245	0.79261	0.379513	0.559323	0.385157		0.534241	0.693243	0.838673	0.630018	0.267004	0.514113	0.645757	0.75383
	0.3945	1.32337	0.216968	0.578708	0.647701	1.81536	0.694425	0.46649		1.31937	0.42223	0.165519	0.174499	0.958203	0.474866	0.031526		0.3945	0.599255	0.540864	1.01258	0.532977	0.714706	0.379513	0.548676	0.385157		0.534241	0.693243	0.917482	0.630018	0.267004	0.514113	0.67616	0.75383
	0.3955	1.26906	0.216968	0.578708	0.647701	1.71518	0.694425	0.46649		1.31937	0.42223	0.165519	0.174499	0.958203	0.550366	0.031526		0.3955	0.655986	0.540864	1.01859	0.532977	0.714706	0.379513	0.534802	0.39279		0.544051	0.743741	0.917482	0.749535	0.302881	0.514113	0.658824	0.75383
	0.3965	1.30875	0.216968	0.578708	0.647701	1.66485	0.694425	0.46649		1.31937	0.42223	0.165519	0.174499	0.912016	0.550366	0.031526		0.3965	0.655986	0.499913	0.789974	0.532977	0.714706	0.379513	0.522161	0.39279		0.544051	0.519858	0.934518	0.654785	0.302881	0.514113	0.658824	0.75383
	0.3975	1.21455	0.216968	0.578708	0.647701	1.66485	0.694425	0.46649		1.31937	0.42223	0.165519	0.174499	0.912016	0.550366	0.031526		0.3975	0.655986	0.461306	0.789974	0.532977	0.714706	0.379513	0.522161	0.39279		0.544051	0.519858	0.986812	0.695513	0.302881	0.514113	0.658824	0.733545
	0.3985	1.21455	0.216968	0.665076	0.647701	1.71816	0.665888	0.46649		1.23915	0.42223	0.165519	0.174499	0.912016	0.550366	0.031526		0.3985	0.655986	0.461306	0.789974	0.530919	0.714706	0.391459	0.522161	0.386012		0.544051	0.519858	0.952796	0.653749	0.247795	0.544836	0.658824	0.793934
	0.3995	1.21455	0.216968	0.665076	0.647701	1.71816	0.665888	0.432738		1.29954	0.444066	0.165519	0.174499	0.912016	0.550366	0.031526		0.3995	0.655986	0.490386	0.781475	0.541908	0.707294	0.380829	0.518443	0.389455		0.544051	0.519858	0.948941	0.706454	0.247795	0.544836	0.671915	0.756032
	0.4005	1.21455	0.216968	0.665076	0.647701	1.71816	0.665888	0.432738		1.29954	0.444066	0.165519	0.174499	0.9123	0.502607	0.031526		0.4005	0.650128	0.502484	0.781475	0.54323	0.707294	0.380829	0.518443	0.389455		0.544051	0.564714	0.938605	0.706454	0.247795	0.509529	0.671915	0.781776
	0.4015	1.24896	0.216968	0.665076	0.647701	1.61223	0.65572	0.432738		1.29954	0.527302	0.165519	0.187187	0.926235	0.502607	0.031526		0.4015	0.650128	0.502484	0.806639	0.54323	0.707294	0.380829	0.518443	0.389455		0.550635	0.761575	0.938605	0.803703	0.247795	0.509529	0.651002	0.781776
	0.4025	1.24896	0.214483	0.665076	0.647701	1.63646	0.661825	0.432738		1.29954	0.545167	0.165519	0.187187	0.926235	0.477644	0.031526		0.4025	0.670202	0.502484	0.806639	0.54323	0.61022	0.380829	0.562749	0.394929		0.519584	0.761575	0.944409	0.795636	0.247795	0.486411	0.651002	0.807285
	0.4035	1.28588	0.214483	0.665076	0.647701	1.62152	0.661825	0.432738		1.29954	0.545167	0.165519	0.187187	0.921763	0.541108	0.031526		0.4035	0.681136	0.515856	0.826907	0.543375	0.61022	0.380829	0.561585	0.397471		0.512981	0.640997	0.877313	0.789285	0.247795	0.486411	0.674431	0.715622
	0.4045	1.28588	0.214483	0.665076	0.647701	1.54624	0.661825	0.432738		1.43539	0.548568	0.165519	0.187187	0.939503	0.541108	0.031526		0.4045	0.69859	0.515856	0.891917	0.543375	0.522694	0.380829	0.561585	0.407305		0.478266	0.640997	0.855422	0.821513	0.247795	0.540854	0.674431	0.715622
	0.4055	1.28588	0.214483	0.665076	0.647701	1.56499	0.661825	0.432738		1.35197	0.548568	0.165519	0.187187	0.95016	0.533821	0.031526		0.4055	0.69859	0.512445	0.912786	0.543375	0.519272	0.376482	0.58654	0.402162		0.478266	0.631013	0.855422	0.759958	0.247795	0.537268	0.730806	0.715622
	0.4065	1.23945	0.214483	0.665076	0.647701	1.57259	0.666055	0.432738		1.22154	0.548568	0.165519	0.187187	0.95016	0.533821	0.031526		0.4065	0.69859	0.512445	0.898769	0.543375	0.418922	0.376482	0.590885	0.410696		0.478266	0.64822	0.855422	0.594749	0.247795	0.524045	0.764151	0.715622
	0.4075	1.23945	0.214483	0.671524	0.640931	1.57259	0.651945	0.463545		1.45028	0.429555	0.165519	0.187187	0.95016	0.565465	0.031526		0.4075	0.690233	0.515067	0.898769	0.543375	0.418922	0.376482	0.590885	0.410696		0.494895	0.631307	0.84481	0.594749	0.247795	0.524045	0.768715	0.736352
	0.4085	1.23945	0.214483	0.671524	0.640931	1.57948	0.651945	0.463545		1.45028	0.429555	0.165519	0.187187	1.04241	0.565465	0.031526		0.4085	0.690233	0.515067	0.896642	0.610084	0.418922	0.376482	0.591385	0.427767		0.494895	0.625984	0.84481	0.594749	0.247795	0.524045	0.768715	0.736352
	0.4095	1.23945	0.214483	0.671524	0.640931	1.60284	0.651945	0.463545		1.85709	0.429555	0.157207	0.187187	1.05013	0.565465	0.031526		0.4095	0.690233	0.64462	0.896642	0.610084	0.418922	0.372144	0.614928	0.427767		0.494895	0.625984	0.872095	0.612774	0.247795	0.546967	0.768715	0.782059
	0.4105	1.23945	0.214483	0.671524	0.640931	1.60284	0.643292	0.463545		1.85709	0.429555	0.157207	0.187187	1.05013	0.554573	0.031526		0.4105	0.690233	0.63258	0.902529	0.611883	0.418922	0.372144	0.614928	0.432184		0.494895	0.733435	0.872095	0.612774	0.324062	0.546967	0.768715	0.782059
	0.4115	1.23945	0.214483	0.671524	0.640931	1.61017	0.643292	0.463545		1.85709	0.429555	0.157207	0.187187	1.02643	0.554573	0.031526		0.4115	0.690233	0.63258	0.902529	0.613757	0.418922	0.372144	0.614928	0.430716		0.494895	0.733435	0.916407	0.594948	0.324062	0.546967	0.784224	0.782059
	0.4125	1.23945	0.214483	0.671524	0.640931	1.61017	0.640792	0.463545		1.53771	0.429555	0.157207	0.187187	1.0438	0.500418	0.031526		0.4125	0.679827	0.63258	0.92469	0.587046	0.540435	0.372144	0.612639	0.44283		0.494895	0.730127	0.944767	0.594948	0.324062	0.546967	0.728962	0.745101
	0.4135	1.23945	0.214483	0.671524	0.640931	1.66709	0.640792	0.49181		1.70886	0.429555	0.157207	0.187187	1.0438	0.500418	0.031526		0.4135	0.679827	0.631358	0.878677	0.578757	0.540435	0.372144	0.612639	0.472818		0.491814	0.737005	0.865791	0.495335	0.324062	0.550776	0.728962	0.76549
	0.4145	1.23945	0.214483	0.671524	0.640931	1.68621	0.640792	0.481717		1.70886	0.429555	0.157207	0.187187	1.02138	0.500418	0.031526		0.4145	0.679827	0.631358	0.856651	0.576833	0.543043	0.372144	0.612639	0.472818		0.491814	0.737005	0.865791	0.533376	0.324062	0.550776	0.728962	0.762984
	0.4155	1.24799	0.214483	0.671524	0.615387	1.68621	0.640792	0.481717		1.70886	0.429555	0.157207	0.187187	1.01186	0.500418	0.031526		0.4155	0.679827	0.618069	0.98392	0.588674	0.51991	0.400012	0.612639	0.466365		0.487919	0.705429	0.830671	0.519189	0.324062	0.50415	0.728962	0.762984
	0.4165	1.2112	0.214483	0.671524	0.615387	1.77344	0.647519	0.4918		1.58701	0.437273	0.157207	0.187187	0.988278	0.477128	0.031526		0.4165	0.679827	0.697972	0.98392	0.588674	0.51991	0.400012	0.608669	0.466365		0.487919	0.656186	0.830671	0.494381	0.324062	0.539393	0.668465	0.748383
	0.4175	1.18332	0.301103	0.77049	0.597367	1.73124	0.660204	0.4918		1.58701	0.437273	0.157207	0.187187	0.988278	0.492824	0.031526		0.4175	0.675961	0.697972	0.993482	0.588674	0.51991	0.388972	0.608669	0.466365		0.487919	0.652622	0.885828	0.494381	0.324062	0.539393	0.668465	0.748383
	0.4185	1.18332	0.301103	0.77049	0.598034	1.72732	0.660204	0.4918		1.82523	0.44492	0.157207	0.187187	1.00723	0.492824	0.031526		0.4185	0.675961	0.697972	0.953203	0.588674	0.51991	0.388972	0.608669	0.464639		0.487919	0.625189	0.98767	0.463635	0.280475	0.539393	0.668465	0.666128
	0.4195	1.18332	0.301103	0.77049	0.598034	1.78036	0.663313	0.4918		1.82523	0.44492	0.157207	0.187187	1.00723	0.492824	0.031526		0.4195	0.675961	0.646539	0.946803	0.590257	0.51991	0.392367	0.608669	0.466642		0.506796	0.65501	1.06973	0.463635	0.280475	0.539393	0.710391	0.666128
	0.4205	1.12661	0.301103	0.77049	0.598034	1.63958	0.663313	0.4918		1.82523	0.486852	0.157207	0.187187	0.97242	0.488487	0.031526		0.4205	0.675961	0.625615	0.946803	0.612753	0.531132	0.392367	0.608669	0.468627		0.506796	0.65501	1.00923	0.442449	0.280475	0.539393	0.710391	0.692704
	0.4215	1.12661	0.301103	0.77049	0.569388	1.65571	0.663773	0.4918		1.7254	0.366931	0.157207	0.187187	0.978955	0.488487	0.031526		0.4215	0.675961	0.622509	0.857232	0.643404	0.582497	0.392367	0.58656	0.453852		0.506796	0.560904	1.00923	0.442449	0.280475	0.550447	0.710391	0.674991
	0.4225	1.12661	0.301103	0.77049	0.569388	1.65571	0.645193	0.4918		1.7254	0.366931	0.157207	0.187187	1.00095	0.464729	0.031526		0.4225	0.675961	0.648433	0.857232	0.631721	0.582497	0.436876	0.58656	0.453852		0.506796	0.569177	1.00923	0.465821	0.280475	0.550447	0.709573	0.687643
	0.4235	1.12661	0.301103	0.77049	0.569388	1.64389	0.658256	0.4918		1.7254	0.366931	0.157207	0.187187	1.02574	0.446566	0.031526		0.4235	0.675961	0.648433	0.857232	0.638057	0.582497	0.436876	0.580229	0.453852		0.527765	0.569177	0.872723	0.465821	0.280475	0.523458	0.717539	0.696814
	0.4245	1.04567	0.301103	0.77049	0.569388	1.57188	0.659205	0.4918		1.8622	0.366931	0.157207	0.187187	1.10513	0.446566	0.031526		0.4245	0.675961	0.648433	0.843333	0.648307	0.890765	0.436876	0.580229	0.422148		0.527765	0.569177	0.872723	0.501673	0.280475	0.523458	0.717539	0.657004
	0.4255	1.04567	0.301103	0.77049	0.569388	1.67479	0.659205	0.4918		1.8746	0.366931	0.157207	0.187187	1.03288	0.446566	0.031526		0.4255	0.629825	0.653315	0.843333	0.648307	0.890765	0.496607	0.577387	0.430687		0.527765	0.532725	0.890477	0.572797	0.280475	0.530541	0.712936	0.640582
	0.4265	1.04567	0.301103	0.77049	0.569388	1.95382	0.661793	0.4918		2.13715	0.366931	0.157207	0.187187	1.03288	0.429154	0.031526		0.4265	0.641973	0.66297	0.843333	0.648307	0.890765	0.496607	0.586084	0.430687		0.535368	0.541384	0.890477	0.518392	0.280475	0.506968	0.712936	0.640582
	0.4275	1.07769	0.301103	0.77049	0.569388	1.88716	0.661793	0.508848		2.13715	0.366931	0.157207	0.187187	1.04983	0.429154	0.031526		0.4275	0.641973	0.706865	0.837052	0.648307	0.892345	0.496607	0.566865	0.432705		0.535368	0.541384	0.95632	0.518392	0.221822	0.499288	0.712936	0.675926
	0.4285	1.07769	0.301103	0.77049	0.569388	1.88192	0.657598	0.508848		2.2457	0.366931	0.157207	0.187187	1.04983	0.438349	0.031526		0.4285	0.641973	0.667929	0.837052	0.659209	0.892345	0.537961	0.566865	0.441072		0.606043	0.50684	0.95632	0.590159	0.221822	0.497506	0.659679	0.66855
	0.4295	1.07769	0.308359	0.810148	0.569388	1.88192	0.657598	0.527549		2.2457	0.366931	0.157207	0.187187	1.04983	0.438349	0.031526		0.4295	0.641973	0.630428	0.834949	0.659209	0.579429	0.537961	0.566865	0.441072		0.606043	0.50684	0.964872	0.666184	0.221822	0.556143	0.663056	0.66855
	0.4305	0.99431	0.308359	0.810148	0.569388	1.79626	0.657598	0.527549		2.2457	0.366931	0.157207	0.187187	1.05236	0.442731	0.031526		0.4305	0.624828	0.630428	0.843512	0.65505	0.639913	0.537961	0.591738	0.440197		0.515622	0.50684	0.964872	0.552529	0.221822	0.556143	0.594868	0.685076
	0.4315	0.99431	0.314104	0.810148	0.569388	1.79626	0.657598	0.527549		1.98469	0.366931	0.157207	0.187187	1.11256	0.509993	0.031526		0.4315	0.624828	0.72368	0.873784	0.680214	0.639913	0.549018	0.606784	0.441558		0.515622	0.511909	0.874649	0.51719	0.221822	0.556143	0.632086	0.685076
	0.4325	1.07414	0.314104	0.810148	0.569388	1.75014	0.657598	0.527549		2.08561	0.366931	0.157207	0.187187	1.17723	0.509993	0.031526		0.4325	0.63561	0.72368	0.902482	0.680214	0.639913	0.549018	0.606784	0.441558		0.515622	0.511909	0.878719	0.510773	0.221822	0.556143	0.655788	0.685076
	0.4335	1.07414	0.314104	0.810148	0.569388	1.59531	0.657598	0.527549		2.1444	0.281701	0.157207	0.187187	1.17723	0.509993	0.031526		0.4335	0.63561	0.640837	0.902482	0.680214	0.639913	0.549018	0.606784	0.441558		0.515622	0.474527	0.878719	0.564821	0.221822	0.556143	0.655788	0.670371
	0.4345	1.07414	0.314104	0.80644	0.569388	1.59531	0.657598	0.536706		2.19929	0.281701	0.157207	0.187187	1.18096	0.509993	0.031526		0.4345	0.645131	0.640837	0.923536	0.680214	0.639913	0.467667	0.608622	0.447329		0.515622	0.431487	0.824245	0.531032	0.221822	0.567529	0.655788	0.699811
	0.4355	1.07414	0.314104	0.80644	0.569388	1.60461	0.657598	0.536706		2.19929	0.281701	0.157207	0.187187	1.18096	0.509993	0.031526		0.4355	0.65633	0.648448	0.949976	0.680214	0.639913	0.467667	0.608622	0.448143		0.515622	0.418522	0.859348	0.596467	0.147043	0.567529	0.655788	0.699811
	0.4365	1.07414	0.314104	0.80644	0.569388	1.52286	0.657598	0.534196		1.95848	0.281701	0.157207	0.187187	1.18096	0.509993	0.031526		0.4365	0.65633	0.648448	0.949976	0.671923	0.639913	0.467667	0.608622	0.448143		0.501778	0.423286	0.83458	0.497584	0.147043	0.615897	0.655788	0.737244
	0.4375	1.07414	0.314104	0.80644	0.569388	1.60933	0.671574	0.554341		2.64894	0.281701	0.157207	0.187187	1.12404	0.505196	0.031526		0.4375	0.65633	0.720978	0.949976	0.670865	0.639913	0.463013	0.608622	0.454733		0.527348	0.423286	0.885607	0.529974	0.147043	0.615897	0.655788	0.771899
	0.4385	1.07414	0.314104	0.80644	0.569388	1.6093	0.667369	0.554341		2.64894	0.281701	0.157207	0.187187	1.04207	0.501159	0.031526		0.4385	0.65633	0.781938	0.91295	0.670865	0.639913	0.463013	0.608622	0.454733		0.527348	0.443043	0.88218	0.519525	0.147043	0.602776	0.655788	0.771899
	0.4395	1.0249	0.314104	0.80644	0.569388	1.56516	0.668477	0.554341		2.64894	0.281701	0.157207	0.187187	1.04207	0.501159	0.031526		0.4395	0.647547	0.816677	0.93906	0.606508	0.639913	0.490104	0.608622	0.454733		0.527348	0.443043	0.88218	0.494615	0.147043	0.602776	0.655788	0.767952
	0.4405	1.0249	0.314104	0.80644	0.630767	1.72416	0.668477	0.554341		2.64894	0.381271	0.157207	0.187187	1.03266	0.521394	0.031526		0.4405	0.647547	0.768131	0.911619	0.606508	0.639913	0.490104	0.54404	0.450196		0.527348	0.443043	0.889074	0.469714	0.147043	0.608201	0.655788	0.767952
	0.4415	1.0249	0.314104	0.80644	0.630767	1.72416	0.70348	0.554341		2.78541	0.381271	0.157207	0.187187	1.03266	0.521394	0.031526		0.4415	0.647547	0.777754	0.919324	0.605617	0.639913	0.531538	0.52128	0.453894		0.527348	0.443043	0.889074	0.515399	0.147043	0.47919	0.655788	0.723176
	0.4425	1.0249	0.389003	0.80644	0.654673	1.72716	0.688502	0.554341		2.91018	0.381271	0.157207	0.187187	1.03266	0.521394	0.031526		0.4425	0.647547	0.743959	0.907073	0.605617	0.639913	0.531538	0.528638	0.451171		0.527348	0.445452	0.890048	0.538682	0.147043	0.483036	0.719791	0.723176
	0.4435	1.0249	0.33784	0.80644	0.654673	1.62966	0.690157	0.554341		2.91018	0.381271	0.157207	0.187187	0.976151	0.521394	0.031526		0.4435	0.647547	0.756645	0.907073	0.601107	0.639913	0.531538	0.528638	0.451171		0.515689	0.509949	0.917529	0.475611	0.147043	0.479776	0.712139	0.723176
	0.4445	1.0249	0.33784	0.80644	0.666258	1.5089	0.729173	0.554341		2.37739	0.381271	0.157207	0.187187	0.976151	0.465082	0.031526		0.4445	0.647547	0.756645	0.887554	0.600723	0.672603	0.531538	0.527284	0.499654		0.515689	0.509949	0.917529	0.465389	0.147043	0.479776	0.725897	0.711582
	0.4455	1.0249	0.33784	0.80644	0.666258	1.5089	0.741257	0.554341		2.16696	0.381271	0.157207	0.187187	1.01518	0.465082	0.031526		0.4455	0.647547	0.715424	0.881152	0.605065	0.672603	0.535128	0.527284	0.522589		0.515689	0.509949	0.959317	0.465389	0.147043	0.479776	0.702167	0.711582
	0.4465	1.0249	0.33784	0.80644	0.666258	1.51861	0.741257	0.554341		2.16696	0.381271	0.157207	0.187187	0.995771	0.493769	0.031526		0.4465	0.633612	0.715424	0.89091	0.605065	0.672603	0.535128	0.51338	0.532302		0.497143	0.509949	1.0092	0.792568	0.147043	0.479776	0.684905	0.7317
	0.4475	1.0249	0.33784	0.80644	0.666258	1.51861	0.732857	0.554341		2.08361	0.381271	0.157207	0.187187	0.957707	0.502575	0.031526		0.4475	0.633612	0.706034	0.911538	0.604823	0.672603	0.535128	0.51338	0.532302		0.538873	0.453772	1.00537	0.729079	0.147043	0.479776	0.672518	0.705683
	0.4485	1.0249	0.33784	0.80644	0.666258	1.5501	0.732857	0.545159		2.08361	0.215615	0.157207	0.176634	0.987317	0.529703	0.031526		0.4485	0.633612	0.706034	0.925916	0.604823	0.672603	0.526622	0.51338	0.550909		0.538873	0.453772	0.902866	0.920268	0.147043	0.479776	0.65209	0.746742
	0.4495	1.0249	0.33784	0.80644	0.666258	1.5501	0.737396	0.545159		2.31582	0.215615	0.157207	0.176634	0.963506	0.529703	0.031526		0.4495	0.633612	0.740975	0.902061	0.604823	0.672603	0.501549	0.51338	0.551069		0.588426	0.453772	0.902866	0.518296	0.147043	0.505235	0.65209	0.746742
	0.4505	1.0249	0.33784	0.80644	0.666258	1.54547	0.756271	0.545159		2.18845	0.215615	0.157207	0.176634	0.998198	0.529703	0.031526		0.4505	0.633612	0.740975	0.902061	0.617368	0.672603	0.509012	0.51338	0.551069		0.593338	0.453772	0.902866	0.509384	0.147043	0.505235	0.65209	0.746742
	0.4515	1.06174	0.33784	0.80644	0.666258	1.54074	0.756271	0.545159		2.18845	0.215615	0.157207	0.176634	0.969459	0.529703	0.031526		0.4515	0.633612	0.716895	0.902061	0.617368	0.672603	0.509012	0.51192	0.551069		0.593338	0.454129	0.95134	0.466928	0.147043	0.525446	0.65209	0.801253
	0.4525	1.06174	0.33784	0.80644	0.666258	1.56242	0.756271	0.545159		2.39656	0.200906	0.157207	0.176634	0.969459	0.529703	0.031526		0.4525	0.633612	0.646938	0.902061	0.625463	0.672603	0.509012	0.51192	0.560407		0.593338	0.525791	0.981284	0.473105	0.147043	0.525446	0.600121	0.83419
	0.4535	1.06174	0.33784	0.80644	0.666258	1.60686	0.805485	0.545159		2.41035	0.200906	0.157207	0.159848	0.969459	0.530486	0.031526		0.4535	0.633612	0.646938	0.902061	0.625463	0.672603	0.509012	0.51192	0.560407		0.593338	0.525791	0.979441	0.472646	0.147043	0.525446	0.600121	0.835031
	0.4545	1.04481	0.33784	0.80644	0.6682	1.71767	0.805485	0.545159		2.41035	0.200906	0.157207	0.159848	0.957069	0.473688	0.031526		0.4545	0.633612	0.646938	0.895857	0.682457	0.672603	0.514399	0.51192	0.643412		0.61652	0.517305	0.979441	0.472646	0.147043	0.514304	0.543932	0.79125
	0.4555	1.04481	0.33784	0.80644	0.6682	1.72243	0.805485	0.545159		2.12434	0.200906	0.157207	0.159848	0.946091	0.473688	0.031526		0.4555	0.633612	0.590333	0.857039	0.668865	0.672603	0.529497	0.51192	0.643412		0.61652	0.517305	0.948462	0.484949	0.147043	0.496294	0.540956	0.755057
	0.4565	1.04481	0.33784	0.80644	0.6682	1.73721	0.800806	0.545159		2.12434	0.200906	0.157207	0.159848	0.946091	0.525139	0.031526		0.4565	0.633612	0.590333	0.833009	0.673048	1.35964	0.529497	0.537342	0.621132		0.61652	0.489785	0.915162	0.404925	0.147043	0.463552	0.58006	0.705493
	0.4575	1.01039	0.419132	0.80644	0.663551	1.78234	0.800806	0.545159		2.12434	0.200906	0.149156	0.159848	0.946091	0.493938	0.031526		0.4575	0.633612	0.601189	0.802932	0.673048	1.35964	0.54772	0.537342	0.549365		0.61652	0.489785	0.915162	0.404925	0.147043	0.463552	0.58006	0.688489
	0.4585	1.01039	0.419132	0.80644	0.663551	1.66123	0.777772	0.545159		2.13444	0.200906	0.149156	0.159848	1.01035	0.493938	0.031526		0.4585	0.633612	0.655963	0.807795	0.673048	1.35964	0.562813	0.537342	0.549365		0.541249	0.489785	0.898695	0.404925	0.147043	0.463552	0.584815	0.688489
	0.4595	1.01039	0.419132	0.80644	0.661611	1.65637	0.777772	0.545159		1.72905	0.200906	0.149156	0.159848	0.980396	0.481479	0.031526		0.4595	0.633612	0.655963	0.804456	0.668014	0.934549	0.53473	0.531298	0.53787		0.538537	0.489785	0.957274	0.514476	0.147043	0.463552	0.551947	0.688489
	0.4605	1.01039	0.419132	0.80644	0.661611	1.65637	0.790089	0.545159		1.72905	0.200906	0.149156	0.159848	0.94908	0.481479	0.031526		0.4605	0.652495	0.663044	0.804456	0.671091	0.955354	0.529471	0.531298	0.508114		0.473691	0.489785	0.957274	0.51232	0.147043	0.449738	0.551947	0.660469
	0.4615	1.01039	0.419132	0.80644	0.661611	1.62671	0.772078	0.545159		1.72905	0.200906	0.149156	0.159848	0.961636	0.49142	0.031526		0.4615	0.652495	0.710709	0.804456	0.671091	0.639708	0.533567	0.531298	0.515075		0.473691	0.423513	0.957274	0.452189	0.147043	0.449738	0.551947	0.660469
	0.4625	0.985676	0.419132	0.870353	0.661611	1.61535	0.772078	0.545159		1.72905	0.200906	0.148396	0.159848	0.961636	0.49142	0.031526		0.4625	0.652495	0.710709	0.83533	0.705655	0.639708	0.533567	0.531298	0.520275		0.473691	0.423513	0.957274	0.452189	0.147043	0.407606	0.551947	0.660469
	0.4635	0.985676	0.419132	0.870353	0.661611	1.58313	0.772078	0.545159		1.72905	0.200906	0.148396	0.159848	1.01265	0.49142	0.031526		0.4635	0.652462	0.680393	0.836548	0.702775	0.639708	0.533567	0.531298	0.514228		0.477653	0.447974	0.95299	0.423203	0.147043	0.394066	0.551947	0.69654
	0.4645	0.985676	0.419132	0.870353	0.661611	1.45224	0.747015	0.545159		1.96096	0.200906	0.148396	0.159848	1.01265	0.49142	0.031526		0.4645	0.652462	0.672468	0.836548	0.703529	0.639708	0.533567	0.573169	0.503867		0.496221	0.454729	0.932856	0.445085	0.147043	0.3637	0.574817	0.722629
	0.4655	0.985676	0.419132	0.860315	0.661611	1.44702	0.747015	0.542169		1.96096	0.200906	0.148396	0.159848	1.03102	0.50364	0.031526		0.4655	0.670448	0.672468	0.836548	0.706559	0.639708	0.533567	0.587449	0.503867		0.496221	0.454729	0.912604	0.526617	0.147043	0.3637	0.609934	0.722629
	0.4665	0.985676	0.419132	0.938441	0.65057	1.64364	0.76574	0.542169		1.96096	0.200906	0.148396	0.159848	1.03102	0.50364	0.031526		0.4665	0.68311	0.672468	0.836548	0.706559	0.639708	0.533567	0.587449	0.498565		0.496221	0.439353	0.85265	0.792103	0.147043	0.356878	0.609934	0.722629
	0.4675	0.985676	0.422738	0.938441	0.65057	1.64364	0.76574	0.542169		1.96096	0.200906	0.148396	0.159848	1.00727	0.536741	0.031526		0.4675	0.68311	0.686841	0.856028	0.715871	0.639708	0.533567	0.587449	0.504855		0.496221	0.444558	0.85265	0.727833	0.147043	0.356878	0.583316	0.70531
	0.4685	0.985676	0.422738	0.938441	0.65057	1.64101	0.759716	0.522182		1.96096	0.200906	0.148396	0.159848	1.01482	0.556102	0.031526		0.4685	0.68311	0.686841	0.856028	0.715871	0.639708	0.51243	0.587449	0.504855		0.530146	0.444558	0.85265	0.455275	0.147043	0.356878	0.583316	0.682622
	0.4695	1.01145	0.422738	0.938441	0.65057	1.69768	0.768959	0.544426		1.9968	0.200906	0.148396	0.159848	0.999396	0.531517	0.031526		0.4695	0.691648	0.686841	0.856028	0.715871	0.934773	0.51243	0.592402	0.485036		0.530146	0.437432	0.89114	0.455275	0.377731	0.356878	0.583316	0.721547
	0.4705	1.02274	0.422738	0.929762	0.65057	1.75779	0.794031	0.544426		1.91841	0.203787	0.148396	0.152526	0.999396	0.531517	0.031526		0.4705	0.716363	0.649154	0.831797	0.704308	0.934773	0.528909	0.592402	0.476562		0.495643	0.437432	0.83606	0.468554	0.377731	0.356878	0.583316	0.710414
	0.4715	1.02274	0.422738	0.929762	0.65057	1.54503	0.79006	0.544426		2.06056	0.203787	0.148396	0.152526	1.02954	0.531517	0.031526		0.4715	0.702859	0.649166	0.920789	0.704308	0.934773	0.550171	0.620507	0.483986		0.507659	0.488213	0.83606	0.46635	0.377731	0.356878	0.583316	0.729926
	0.4725	1.02274	0.422738	0.929762	0.65057	1.53592	0.79006	0.544426		2.06056	0.203787	0.148396	0.152526	0.957033	0.471445	0.031526		0.4725	0.702859	0.649166	0.920789	0.713026	0.934773	0.565945	0.620507	0.484211		0.507659	0.488213	0.873993	0.46635	0.377731	0.356878	0.583316	0.729926
	0.4735	1.02274	0.422738	0.929762	0.65057	1.53592	0.79006	0.544426		2.06056	0.203787	0.148396	0.152526	1.00862	0.465693	0.378356		0.4735	0.702859	0.650029	0.920789	0.713026	0.705463	0.565945	0.623521	0.496338		0.507659	0.488213	0.873993	0.466187	0.377731	0.355781	0.583316	0.720962
	0.4745	0.96599	0.422738	0.929762	0.65057	1.53592	0.79006	0.544426		1.73333	0.203787	0.148396	0.152526	1.00862	0.465693	0.378356		0.4745	0.702859	0.650029	0.938683	0.655127	0.705463	0.565945	0.623521	0.496338		0.507659	0.488213	0.835445	0.448079	0.377731	0.355781	0.583316	0.724704
	0.4755	0.96599	0.422738	0.929762	0.65057	1.5871	0.79006	0.544426		1.73333	0.203787	0.148396	0.152526	0.991731	0.404999	0.378356		0.4755	0.725352	0.661177	0.938683	0.655127	0.596765	0.565945	0.623521	0.496338		0.507659	0.493484	0.835445	0.448079	0.152187	0.355781	0.547161	0.759219
	0.4765	1.0267	0.422738	0.929762	0.6069	1.77911	0.79006	0.544426		1.50891	0.170703	0.148396	0.152526	1.01526	0.501192	0.378356		0.4765	0.725352	0.710089	0.909377	0.682893	0.596765	0.5788	0.623521	0.486298		0.507659	0.493484	0.835445	0.4667	0.152187	0.355781	0.566776	0.759219
	0.4775	1.0267	0.422738	0.992812	0.6069	1.78257	0.759721	0.544426		1.50891	0.205741	0.148396	0.152526	1.01526	0.501192	0.374013		0.4775	0.72115	0.710089	0.827542	0.682893	0.596765	0.5788	0.648854	0.492665		0.503545	0.420444	0.970846	0.479319	0.152187	0.355781	0.536015	0.749112
	0.4785	1.07066	0.422738	0.992812	0.6069	1.78257	0.759721	0.544426		1.50891	0.205741	0.148396	0.152526	1.0258	0.472264	0.374013		0.4785	0.72115	0.712697	0.834678	0.685633	0.596765	0.574151	0.66339	0.493796		0.503545	0.420444	1.02961	0.393767	0.152187	0.379583	0.536015	0.73913
	0.4795	1.12647	0.422738	0.992812	0.595085	1.81118	0.730153	0.544426		1.58963	0.205741	0.148396	0.152526	1.03861	0.472264	0.374013		0.4795	0.72115	0.718975	0.834678	0.69713	0.596765	0.574151	0.71541	0.488884		0.518676	0.631902	1.04814	0.415224	0.152187	0.379583	0.536015	0.702592
	0.4805	1.12647	0.440644	0.992812	0.595085	1.81118	0.705306	0.544426		1.54358	0.205741	0.148396	0.152526	1.03861	0.472264	0.374013		0.4805	0.72115	0.727737	0.834678	0.696864	0.895076	0.574151	0.724942	0.482197		0.518676	0.631902	1.06123	0.415224	0.152187	0.379583	0.530048	0.763975
	0.4815	1.12647	0.616431	0.992812	0.595085	1.69317	0.704248	0.544426		1.54358	0.205741	0.148396	0.152526	1.05149	0.472264	0.027053		0.4815	0.72115	0.688063	0.818664	0.634127	0.895076	0.588385	0.724942	0.482197		0.558785	0.519674	1.06123	0.440547	0.152187	0.379583	0.530048	0.763975
	0.4825	1.12647	0.616431	0.992812	0.595085	1.75582	0.704248	0.544426		1.54358	0.205741	0.148396	0.152526	1.06112	0.450088	0.027053		0.4825	0.738556	0.688063	0.835944	0.634127	0.97267	0.588385	0.737387	0.48803		0.58191	0.53119	0.967435	0.430079	0.273078	0.379583	0.530048	0.763975
	0.4835	1.12647	0.616431	0.992812	0.595085	1.75582	0.687644	0.544426		1.45559	0.205741	0.148396	0.152526	1.06112	0.450088	0.027053		0.4835	0.738556	0.698584	0.841385	0.625665	0.81824	0.609782	0.737387	0.485545		0.58191	0.671923	1.10028	0.430079	0.273078	0.379583	0.559671	0.774865
	0.4845	1.12647	0.616431	0.992812	0.595085	1.74726	0.685531	0.564115		1.27265	0.205741	0.148396	0.152526	1.01178	0.450088	0.027053		0.4845	0.738556	0.835147	0.837526	0.625665	0.942762	0.607166	0.748694	0.473181		0.58191	0.671923	1.379	0.496857	0.273078	0.379583	0.559671	0.845781
	0.4855	1.12647	0.616431	0.992812	0.595085	1.77698	0.685531	0.564115		1.32363	0.205741	0.148396	0.152526	1.02336	0.450088	0.027053		0.4855	0.738556	0.835147	0.837526	0.625665	0.942762	0.607166	0.748694	0.473181		0.58191	0.776231	1.38388	0.513678	0.273078	0.392142	0.552712	0.845781
	0.4865	1.12647	0.609557	0.992812	0.585459	1.75964	0.685531	0.564115		1.32363	0.205741	0.148396	0.172045	1.02336	0.448228	0.027053		0.4865	0.738556	0.654465	0.841934	0.630513	0.942762	0.612201	0.748694	0.466757		0.598157	0.776439	1.38388	0.475062	0.273078	0.444332	0.552712	0.875911
	0.4875	1.2346	0.609557	0.992812	0.585459	1.77527	0.672802	0.564115		1.32363	0.205741	0.148396	0.174671	1.02336	0.448228	0.027053		0.4875	0.738556	0.699978	0.85989	0.630513	0.574526	0.612201	0.6499	0.466757		0.598157	0.700204	1.27799	0.529799	0.273078	0.450753	0.559626	0.776011
	0.4885	1.2346	0.609557	1.0579	0.594515	1.92102	0.658703	0.564115		1.32363	0.205741	0.148396	0.174671	1.08057	0.454171	0.027053		0.4885	0.738556	0.699978	0.871649	0.631295	0.574526	0.614683	0.6499	0.466757		0.60524	0.700204	1.00733	0.529898	0.273078	0.481733	0.572842	0.752046
	0.4895	1.25209	0.609557	1.0579	0.594515	1.98246	0.658703	0.564115		1.32363	0.217056	0.148396	0.171718	1.07987	0.454171	0.027053		0.4895	0.738556	0.699978	0.871649	0.631295	0.574526	0.600618	0.640899	0.463373		0.60524	0.700204	1.00733	0.603715	0.273078	0.489088	0.565391	0.752046
	0.4905	1.25209	0.609557	1.0579	0.594515	1.82016	0.656794	0.561003		1.1916	0.217056	0.148396	0.171718	1.07987	0.454171	0.027053		0.4905	0.738556	0.705684	0.927296	0.612306	0.574526	0.600618	0.65826	0.463373		0.598781	0.763936	0.971632	0.660871	0.273078	0.501245	0.565391	0.752046
	0.4915	1.25209	0.609557	1.10804	0.594515	1.82016	0.672848	0.570216		1.1916	0.217056	0.148396	0.171718	1.07987	0.439002	0.027053		0.4915	0.718761	0.705684	0.927296	0.611786	0.574526	0.624525	0.65826	0.451016		0.598781	0.763936	0.971632	0.475419	0.273078	0.490583	0.564783	0.752046
	0.4925	1.25145	0.626924	1.10804	0.594515	1.79279	0.672848	0.570216		1.20962	0.274505	0.148396	0.168892	1.08163	0.439002	0.027053		0.4925	0.763601	0.764445	0.920376	0.611786	0.574526	0.624525	0.65826	0.448769		0.598781	0.768119	0.933961	0.475419	0.273078	0.50919	0.564783	0.760064
	0.4935	1.25145	0.626924	1.10804	0.594515	1.68214	0.672848	0.570216		1.20962	0.274505	0.148396	0.168892	1.07039	0.439002	0.285723		0.4935	0.763601	0.764445	0.911108	0.611786	0.574526	0.605115	0.65826	0.448769		0.598781	0.866616	0.933961	0.428164	0.138257	0.522209	0.542814	0.760064
	0.4945	1.26188	0.626924	1.14856	0.594515	1.78359	0.672848	0.570216		1.01509	0.274505	0.148396	0.168892	1.07039	0.426274	0.285723		0.4945	0.763601	0.713062	0.911108	0.6091	0.574526	0.605115	0.65826	0.467647		0.549697	0.866616	0.933961	0.428164	0.138257	0.531287	0.542814	0.791311
	0.4955	1.26188	0.51939	1.14856	0.594515	1.79163	0.664533	0.570216		1.01509	0.274505	0.148396	0.168892	1.12865	0.48878	0.285723		0.4955	0.763601	0.737025	0.918971	0.610059	0.602317	0.605115	0.673981	0.462588		0.549697	0.996118	0.930373	0.429216	0.138257	0.531287	0.553197	0.839748
	0.4965	1.26188	0.51939	1.14856	0.594515	1.803	0.664533	0.570216		1.01509	0.274505	0.148396	0.168892	1.20226	0.48878	0.285723		0.4965	0.763601	0.702169	0.918971	0.59909	0.629724	0.614374	0.673981	0.46913		0.531133	0.962797	0.809457	0.500466	0.138257	0.541271	0.603642	0.823159
	0.4975	1.26188	0.51939	1.14856	0.583698	1.72232	0.664533	0.572502		0.931209	0.274505	0.148396	0.168892	1.47752	0.48282	0.285723		0.4975	0.763601	0.697168	0.896201	0.562848	0.629724	0.614374	0.682507	0.48342		0.531133	0.826635	0.809457	0.500466	0.138257	0.544129	0.603642	0.823159
	0.4985	1.26188	0.482899	1.14856	0.583698	1.79323	0.664533	0.572502		0.931209	0.274505	0.148396	0.168892	1.37768	0.48282	0.02702		0.4985	0.763601	0.697168	0.896201	0.568228	0.552932	0.588602	0.682507	0.48342		0.571677	0.826635	0.842626	0.523203	0.138257	0.544129	0.603642	0.803908
	0.4995	1.26188	0.505827	1.14856	0.583698	1.79323	0.664533	0.572502		0.931209	0.274505	0.148396	0.168892	1.3491	0.48282	0.02702		0.4995	0.779134	0.708879	0.896201	0.575439	0.552932	0.592428	0.682507	0.491923		0.59003	0.812185	0.842626	0.523203	0.138257	0.522346	0.603642	0.803908
	0.5005	1.24451	0.505827	1.14856	0.590312	1.86385	0.664533	0.572502		1.11466	0.274505	0.148396	0.168892	1.3491	0.524512	0.02702		0.5005	0.779134	0.708879	0.880173	0.575439	0.438815	0.592428	0.682507	0.501125		0.59003	0.773739	0.86706	0.494965	0.138257	0.5351	0.610512	0.783303
	0.5015	1.24451	0.505827	1.14856	0.590312	1.74966	0.664533	0.572502		1.11466	0.154931	0.148396	0.168892	1.28254	0.541351	0.02702		0.5015	0.779134	0.79165	0.880173	0.575439	0.438815	0.58595	0.678268	0.49448		0.59003	0.773739	0.896489	0.510398	0.138257	0.5351	0.604008	0.783303
	0.5025	1.16832	0.505827	1.14856	0.590312	1.66483	0.664533	0.572502		1.11466	0.154931	0.148396	0.168892	1.22128	0.587573	0.02702		0.5025	0.779134	0.785466	0.948448	0.575439	0.438815	0.58595	0.70111	0.49448		0.59003	0.773739	0.896489	0.540617	0.138257	0.5351	0.613977	0.756947
	0.5035	1.06203	0.688375	1.14856	0.590312	1.65975	0.664533	0.572502		1.19857	0.154931	0.148396	0.168892	0.938006	0.587573	0.02702		0.5035	0.779134	0.785466	0.948448	0.575439	0.438815	0.58595	0.70111	0.497983		0.529995	0.773739	0.914895	0.461212	0.138257	0.5351	0.613977	0.756947
	0.5045	1.06203	0.688375	1.14856	0.590312	1.65975	0.664533	0.572502		1.19857	0.154931	0.148396	0.168892	0.958327	0.572399	0.02702		0.5045	0.791143	0.745908	0.886222	0.575439	0.438815	0.58595	0.70111	0.497983		0.529995	0.706664	0.966667	0.417168	0.138257	0.5351	0.63026	0.769777
	0.5055	0.984359	0.688375	1.14856	0.590312	1.64191	0.676141	0.572502		1.19857	0.154931	0.148396	0.168892	0.958327	0.572399	0.02702		0.5055	0.791143	0.722128	0.908146	0.595515	0.438815	0.58595	0.70111	0.50013		0.529995	0.707742	0.977616	0.417168	0.138257	0.545273	0.63026	0.778815
	0.5065	0.984359	0.688375	1.14856	0.552778	1.62544	0.675508	0.565914		1.35708	0.154931	0.148396	0.168892	0.974493	0.572399	0.02702		0.5065	0.791143	0.722128	0.975982	0.595515	0.438815	0.577884	0.70111	0.516736		0.474655	0.80833	0.977616	0.505336	0.138257	0.545273	0.603314	0.778815
	0.5075	0.984359	0.688375	1.19315	0.552778	1.55738	0.675508	0.565914		1.35708	0.154931	0.148396	0.168892	0.993287	0.540039	0.02702		0.5075	0.797085	0.724658	0.937238	0.595597	0.438815	0.608508	0.70111	0.507688		0.474655	0.80833	0.977616	0.513949	0.138257	0.545273	0.65759	0.76873
	0.5085	0.984359	0.688375	1.19315	0.541377	1.55738	0.668403	0.566511		1.35708	0.154931	0.148396	0.168892	0.984531	0.540039	0.02702		0.5085	0.797085	0.724658	0.937238	0.595597	0.438815	0.608508	0.70111	0.507688		0.474655	0.636741	0.910049	0.453954	0.138257	0.500806	0.65759	0.771568
	0.5095	0.984359	0.688375	1.19315	0.541377	1.52809	0.668403	0.566511		1.35708	0.154931	0.148396	0.168892	0.989138	0.548278	0.02702		0.5095	0.803799	0.712783	0.916497	0.603282	0.438815	0.592418	0.722074	0.512671		0.497749	0.600698	0.927895	0.556122	0.342939	0.518803	0.665132	0.784798
	0.5105	0.984359	0.688375	1.21955	0.541377	1.52809	0.692676	0.566511		1.35708	0.154931	0.148396	0.168892	0.989138	0.548278	0.02702		0.5105	0.803799	0.70916	0.916497	0.603282	0.438815	0.638711	0.735491	0.562526		0.497749	0.596084	0.894727	0.556122	0.342939	0.538411	0.665132	0.744993
	0.5115	0.986019	0.688375	1.21955	0.541377	1.52809	0.712476	0.566511		1.41491	0.154931	0.14145	0.168892	0.989138	0.548278	0.02702		0.5115	0.794098	0.663655	0.924098	0.582183	0.438815	0.667207	0.754332	0.562526		0.497749	0.596084	0.894727	0.556122	0.342939	0.538411	0.665132	0.752325
	0.5125	0.986019	0.51714	1.16195	0.541377	1.52809	0.712476	0.566511		1.41491	0.154931	0.14145	0.168892	0.989138	0.548278	0.02702		0.5125	0.794098	0.663655	0.941302	0.571614	0.438815	0.669088	0.753788	0.565323		0.497749	0.582612	0.87081	0.575664	0.538757	0.538411	0.665132	0.744788
	0.5135	0.986019	0.51714	1.16195	0.541377	1.56287	0.694773	0.566511		1.41491	0.154931	0.14145	0.173002	0.981119	0.538017	0.02702		0.5135	0.794098	0.663655	0.88052	0.561116	0.438815	0.669088	0.784646	0.553357		0.504102	0.565606	0.956147	0.561144	0.538757	0.538411	0.665132	0.744788
	0.5145	0.982959	0.389504	1.16195	0.560403	1.66847	0.704064	0.584382		1.41491	0.171248	0.14145	0.173002	0.98247	0.495997	0.02702		0.5145	0.794098	0.676954	0.88052	0.561116	0.438815	0.669088	0.784646	0.554268		0.504102	0.45207	0.958565	0.479499	0.538757	0.582967	0.666935	0.744788
	0.5155	0.982959	0.389504	1.19145	0.560403	1.65839	0.727437	0.584382		1.00703	0.171248	0.14145	0.173002	0.98247	0.472731	0.02702		0.5155	0.794098	0.687675	0.86428	0.561116	0.438815	0.702454	0.784646	0.554268		0.504102	0.45207	0.958565	0.479499	0.538757	0.582967	0.725415	0.698217
	0.5165	0.982959	0.389504	1.19145	0.560403	1.65839	0.789855	0.584382		1.07754	0.171248	0.14145	0.173002	0.975691	0.472731	0.02702		0.5165	0.78425	0.687675	0.86428	0.559414	0.438815	0.759604	0.784646	0.554268		0.445021	0.462006	0.958565	0.559841	0.538757	0.639243	0.725415	0.724239
	0.5175	0.982959	0.389504	1.19145	0.560403	1.66	0.789855	0.584382		1.07754	0.196532	0.14145	0.173002	0.975691	0.492797	0.02702		0.5175	0.78425	0.707369	0.867456	0.559414	0.513578	0.758736	0.75478	0.509004		0.445021	0.461703	0.957143	0.468489	0.538757	0.653008	0.725415	0.69239
	0.5185	0.982959	0.389504	1.19145	0.560403	1.54341	0.789855	0.584382		1.06743	0.208358	0.14145	0.173002	0.975691	0.492797	0.02702		0.5185	0.809577	0.707369	0.860289	0.562111	0.513578	0.758736	0.746696	0.510714		0.436722	0.461703	0.957143	0.456473	0.538757	0.653008	0.725415	0.69239
	0.5195	0.982959	0.389504	1.19145	0.560403	1.52072	0.789855	0.625569		1.06743	0.208358	0.14145	0.191249	0.953978	0.480835	0.02702		0.5195	0.809577	0.744919	0.872482	0.562111	0.513578	0.773176	0.737093	0.510714		0.47175	0.476683	1.0132	0.473656	0.538757	0.6753	0.791042	0.69239
	0.5205	0.982959	0.389504	1.19145	0.565594	1.53023	0.78558	0.625569		1.06743	0.208358	0.14145	0.191249	0.953978	0.480835	0.02702		0.5205	0.809577	0.744919	0.872482	0.562111	0.513578	0.734021	0.718894	0.510852		0.47175	0.476683	0.986473	0.535305	0.538757	0.698137	0.840429	0.674181
	0.5215	0.982959	0.389504	1.19145	0.565594	1.57869	0.817719	0.625569		1.06743	0.208358	0.14145	0.191249	0.953978	0.480835	0.02702		0.5215	0.809577	0.700996	0.855552	0.562111	0.513578	0.694568	0.738005	0.509277		0.483841	0.476683	1.01948	0.576002	0.538757	0.698137	0.863472	0.687739
	0.5225	1.06802	0.389504	1.19145	0.565594	1.57869	0.817719	0.625569		1.06743	0.208358	0.14145	0.191249	0.960154	0.480835	0.02702		0.5225	0.809577	0.700996	0.862958	0.578255	0.513578	0.68637	0.710158	0.509725		0.483841	0.476683	1.01948	0.629357	0.323241	0.708967	0.863472	0.611797
	0.5235	1.06802	0.389504	1.16838	0.565594	1.57869	0.817719	0.625569		1.20429	0.208358	0.14145	0.191249	0.960154	0.480835	0.02702		0.5235	0.809577	0.640787	0.862958	0.578255	0.513578	0.68637	0.700965	0.506505		0.483841	0.460816	0.995479	0.717688	0.323241	0.708967	0.87409	0.611797
	0.5245	1.06802	0.30229	1.16838	0.568768	1.48241	0.817719	0.631847		0.939297	0.208358	0.14145	0.191249	0.968819	0.446394	0.02702		0.5245	0.812443	0.640787	0.862958	0.578255	0.513578	0.68637	0.700965	0.506505		0.483841	0.50015	0.995479	0.650906	0.323241	0.623579	0.90421	0.643463
	0.5255	1.04145	0.303072	1.16838	0.568768	1.46861	0.777069	0.631847		0.939297	0.208358	0.14145	0.191249	1.01009	0.494689	0.02702		0.5255	0.812443	0.640787	0.926182	0.582926	0.513578	0.68637	0.700965	0.506505		0.483841	0.508322	0.956206	0.613937	0.323241	0.678152	0.90421	0.657703
	0.5265	1.04145	0.43621	1.16838	0.568768	1.46917	0.777069	0.631847		0.875208	0.208358	0.14145	0.191249	1.01009	0.494689	0.02702		0.5265	0.812443	0.641855	0.926182	0.565959	0.499125	0.693827	0.700965	0.518879		0.510528	0.508322	0.986526	0.488607	0.323241	0.670771	0.90421	0.685601
	0.5275	1.07167	0.494727	1.16838	0.582797	1.46917	0.770096	0.625956		0.875208	0.265285	0.14145	0.191249	1.0597	0.494689	0.02702		0.5275	0.812443	0.641855	0.941382	0.575096	0.499125	0.752455	0.700965	0.533832		0.510528	0.508322	1.02381	0.488607	0.323241	0.686562	0.953125	0.743405
	0.5285	1.07167	0.494727	1.16838	0.582797	1.51138	0.779011	0.625956		0.875208	0.265285	0.14145	0.191249	1.02174	0.567079	0.02702		0.5285	0.818481	0.793205	0.938776	0.575096	0.499125	0.752455	0.70126	0.538007		0.510528	0.508322	1.02381	0.465055	0.12291	0.686562	0.88582	0.743405
	0.5295	1.07167	0.494727	1.16838	0.582797	1.50398	0.779011	0.625956		0.875208	0.265285	0.14145	0.191249	1.02174	0.567079	0.02702		0.5295	0.818481	0.74034	0.938776	0.575079	0.499125	0.752455	0.706819	0.538811		0.554306	0.508322	0.964852	0.462282	0.12291	0.583685	0.79484	0.743405
	0.5305	1.07167	0.523534	1.12257	0.582797	1.45477	0.779011	0.625956		0.875208	0.265285	0.14145	0.191249	1.02651	0.567079	0.02702		0.5305	0.818481	0.563095	0.932969	0.575079	0.499125	0.7492	0.723407	0.554689		0.605576	0.508322	0.964852	0.462282	0.12291	0.567619	0.821018	0.71727
	0.5315	1.1003	0.519329	1.12257	0.582797	1.48202	0.779011	0.625956		0.875208	0.265285	0.14145	0.191249	1.02651	0.510093	0.02702		0.5315	0.818481	0.563095	0.933414	0.575079	0.476785	0.7492	0.717818	0.566845		0.605576	0.508322	0.964852	0.521443	0.12291	0.596897	0.796028	0.757001
	0.5325	1.1003	0.519329	1.12257	0.582797	1.48693	0.776076	0.625956		0.875208	0.286321	0.14145	0.191249	1.038	0.456182	0.02702		0.5325	0.818481	0.563095	0.922937	0.56335	0.476785	0.664811	0.717818	0.566845		0.591608	0.365156	0.964852	0.543892	0.12291	0.596897	0.660869	0.750151
	0.5335	1.1003	0.527699	1.12257	0.603371	1.51374	0.767924	0.625956		0.912028	0.286321	0.14145	0.191249	0.997158	0.456182	0.02702		0.5335	0.784847	0.563095	0.974337	0.56494	0.476785	0.711309	0.717818	0.566845		0.591608	0.365156	0.955952	0.523688	0.12291	0.64835	0.753591	0.750151
	0.5345	1.10812	0.527699	1.12257	0.603371	1.51374	0.767924	0.619498		0.945411	0.286321	0.14145	0.191249	0.986151	0.456182	0.02702		0.5345	0.784847	0.599125	0.974337	0.574867	0.608798	0.711309	0.717818	0.562988		0.576182	0.365156	0.963954	0.632121	0.12291	0.658403	0.752451	0.750151
	0.5355	1.10539	0.527699	1.12257	0.603371	1.56281	0.771531	0.620603		0.945411	0.286321	0.14145	0.191249	0.952587	0.456182	0.02702		0.5355	0.814634	0.599125	0.975123	0.574867	0.608798	0.711309	0.717818	0.571435		0.576182	0.365156	0.960082	0.565596	0.12291	0.674268	0.752451	0.747299
	0.5365	1.10539	0.527699	1.12257	0.603371	1.58577	0.771531	0.620603		0.945411	0.286321	0.14145	0.191249	0.952587	0.462474	0.02702		0.5365	0.814634	0.599125	0.975123	0.591131	0.608798	0.729114	0.726261	0.571435		0.576182	0.368298	0.960082	0.565596	0.12291	0.674268	0.764669	0.743334
	0.5375	1.10539	0.527699	1.12257	0.603371	1.53948	0.793651	0.620603		0.945411	0.286321	0.14145	0.191249	0.952587	0.406422	0.02702		0.5375	0.814634	0.599125	0.99251	0.591131	0.605145	0.72533	0.726261	0.557904		0.576182	0.368298	0.960082	0.476803	0.12291	0.690018	0.764669	0.679471
	0.5385	1.10539	0.527699	1.12257	0.603371	1.53948	0.793651	0.620603		0.945411	0.286321	0.14145	0.191249	0.918294	0.440905	0.02702		0.5385	0.814634	0.599125	0.99251	0.595394	0.530722	0.735457	0.734866	0.557904		0.509023	0.368298	0.960082	0.476803	0.12291	0.691102	0.764669	0.75023
	0.5395	1.12167	0.527699	1.12257	0.603371	1.53948	0.793651	0.620603		0.945411	0.286321	0.14145	0.191249	0.949968	0.440905	0.02702		0.5395	0.814634	0.645884	0.96941	0.595394	0.530722	0.74619	0.734866	0.563562		0.468495	0.369486	0.979474	0.395014	0.323657	0.687878	0.776474	0.761013
	0.5405	1.24742	0.555044	1.12257	0.603371	1.56742	0.793247	0.620603		1.08972	0.286321	0.14145	0.191249	0.943269	0.47312	0.02702		0.5405	0.814634	0.645884	0.90713	0.595394	0.530722	0.74619	0.734866	0.563562		0.468495	0.365181	0.968681	0.395014	0.323657	0.676991	0.773922	0.761013
	0.5415	1.25087	0.55578	1.14527	0.603371	1.60852	0.793247	0.620603		1.08972	0.227607	0.14145	0.191249	0.958504	0.47312	0.02702		0.5415	0.835965	0.6625	0.905891	0.586047	0.530722	0.792765	0.734866	0.566535		0.468495	0.365181	0.982088	0.406161	0.319145	0.616002	0.700893	0.761013
	0.5425	1.25087	0.55578	1.16002	0.603371	1.57754	0.77874	0.620603		1.24878	0.227607	0.14145	0.208024	0.958504	0.47312	0.02702		0.5425	0.835965	0.665978	0.9129	0.586047	0.530722	0.792765	0.734866	0.55786		0.472075	0.365181	0.942147	0.42413	0.319145	0.616002	0.700893	0.742663
	0.5435	1.25087	0.55578	1.16002	0.603371	1.57754	0.77874	0.620603		1.24878	0.227607	0.14145	0.229504	0.958504	0.47312	0.02702		0.5435	0.835965	0.67072	0.903902	0.576797	0.530722	0.8049	0.754832	0.55786		0.472075	0.365181	0.941515	0.42413	0.319145	0.616002	0.700893	0.742663
	0.5445	1.22471	0.55578	1.16002	0.576959	1.59125	0.77874	0.620603		1.12591	0.227607	0.14145	0.216971	0.977903	0.47312	0.02702		0.5445	0.835965	0.67072	0.903902	0.576797	0.530722	0.8049	0.748419	0.55786		0.472075	0.365181	0.89516	0.44152	0.319145	0.574664	0.680714	0.758172
	0.5455	1.22471	0.55578	1.16002	0.576959	1.52269	0.795375	0.620603		1.12591	0.227607	0.14145	0.216971	0.931809	0.47312	0.02702		0.5455	0.780649	0.625278	0.889488	0.576797	0.616435	0.79475	0.748419	0.55786		0.472075	0.42098	0.89516	0.426802	0.319145	0.611548	0.691461	0.758172
	0.5465	1.22471	0.438488	1.16002	0.576959	1.54331	0.805372	0.64823		1.12591	0.227607	0.14145	0.216971	0.924135	0.492186	0.02702		0.5465	0.780649	0.639694	0.890087	0.595473	0.616435	0.79475	0.748419	0.561798		0.472075	0.360631	0.904871	0.426802	0.319145	0.611548	0.683823	0.814574
	0.5475	1.27328	0.438488	1.16002	0.576959	1.54331	0.80869	0.64823		1.07751	0.251378	0.14145	0.216971	0.961246	0.476805	0.02702		0.5475	0.780649	0.61048	0.893233	0.595473	0.620133	0.816139	0.737527	0.558202		0.531012	0.39902	0.815603	0.403129	0.319145	0.611548	0.683823	0.765738
	0.5485	1.27328	0.438488	1.16002	0.576959	1.5166	0.80869	0.64823		1.07751	0.251378	0.14145	0.216971	1.11453	0.476805	0.02702		0.5485	0.79796	0.633965	0.886363	0.595473	0.620133	0.816139	0.740638	0.548912		0.531012	0.39902	0.811941	0.403129	0.319145	0.613026	0.665018	0.765738
	0.5495	1.27328	0.438488	1.16002	0.576959	1.49537	0.813347	0.669014		0.921187	0.251378	0.14145	0.216971	1.11453	0.523951	0.02702		0.5495	0.79796	0.633965	0.886363	0.594827	0.620133	0.848611	0.740638	0.539179		0.531012	0.39902	0.811941	0.5009	0.851274	0.540896	0.665018	0.724346
	0.5505	1.27328	0.438488	1.16002	0.576959	1.49537	0.813347	0.693368		0.921187	0.251378	0.14145	0.216971	1.11453	0.523951	0.02702		0.5505	0.831642	0.661815	0.886363	0.59947	0.620133	0.848611	0.757873	0.539179		0.678413	0.39902	0.819713	0.543993	0.79312	0.540896	0.665018	0.717449
	0.5515	1.27328	0.438488	1.16002	0.576959	1.48023	0.789739	0.693368		0.921187	0.2379	0.14145	0.216971	1.11453	0.494529	0.02702		0.5515	0.831642	0.675454	0.879392	0.599406	0.620133	0.870252	0.759139	0.540002		0.678413	0.39902	0.844618	0.572198	0.787322	0.432889	0.671335	0.715929
	0.5525	1.27328	0.438488	1.16002	0.576959	1.48122	0.813893	0.693368		0.903827	0.2379	0.14145	0.216971	0.973719	0.494529	0.02702		0.5525	0.831642	0.675454	0.865492	0.599406	0.620133	0.869539	0.759139	0.532547		0.678413	0.397624	0.844618	0.622044	0.772457	0.432889	0.671335	0.715929
	0.5535	1.27328	0.438488	1.16002	0.576959	1.47105	0.807948	0.693368		0.903827	0.233527	0.14145	0.216971	0.951498	0.494529	0.02702		0.5535	0.831642	0.675454	0.865492	0.599172	0.492482	0.858084	0.769875	0.529341		0.678413	0.397236	0.822311	0.462256	0.772457	0.424027	0.671335	0.71891
	0.5545	1.27328	0.438488	1.16002	0.576959	1.47105	0.793093	0.693368		0.903827	0.233527	0.14145	0.216971	0.963485	0.494529	0.02702		0.5545	0.83486	0.59316	0.864158	0.599172	0.492482	0.858084	0.772359	0.526391		0.727279	0.418472	0.822311	0.462256	0.912504	0.42745	0.654731	0.70749
	0.5555	1.27328	0.438488	1.16002	0.576959	1.50151	0.796574	0.693368		0.695825	0.233527	0.14145	0.216971	0.953696	0.566242	0.02702		0.5555	0.840728	0.59316	0.889712	0.605081	0.492482	0.845062	0.772359	0.525743		0.708445	0.418472	0.822311	0.521895	0.517374	0.42745	0.643669	0.729635
	0.5565	1.31109	0.470198	1.16002	0.576959	1.53899	0.796574	0.693368		0.695825	0.233527	0.14145	0.216971	0.957184	0.63081	0.02702		0.5565	0.840747	0.59316	0.876429	0.612748	0.492482	0.845062	0.743518	0.525743		0.717907	0.418472	0.822311	0.577178	0.581692	0.42745	0.643669	0.714278
	0.5575	1.19329	0.427613	1.16002	0.576959	1.5719	0.796574	0.703677		0.695825	0.233527	0.14145	0.216971	0.957184	0.561509	0.02702		0.5575	0.840747	0.59316	0.854267	0.612748	0.616452	0.800953	0.730066	0.559464		0.713705	0.412539	0.885484	0.577178	0.581692	0.42745	0.643669	0.714278
	0.5585	1.19329	0.427613	1.16002	0.576959	1.7278	0.796574	0.690485		0.695825	0.233527	0.14145	0.216971	0.95696	0.561509	0.02702		0.5585	0.840747	0.626258	0.854267	0.612748	0.607143	0.811587	0.730066	0.566659		0.713705	0.449852	1.16007	0.598027	0.612759	0.42745	0.64688	0.714278
	0.5595	1.19329	0.427613	1.16002	0.576959	1.7278	0.764753	0.692354		0.695825	0.272768	0.14145	0.216971	0.959231	0.561509	0.02702		0.5595	0.840747	0.609337	0.851976	0.611878	0.607143	0.839707	0.71589	0.591611		0.713705	0.449852	1.16007	0.607189	0.612759	0.436089	0.62077	0.694194
	0.5605	1.19329	0.427613	1.16002	0.576959	1.74552	0.764753	0.692354		0.695825	0.272768	0.14145	0.216971	0.959231	0.561509	0.02702		0.5605	0.845437	0.609337	0.865542	0.611878	0.607143	0.858384	0.71589	0.58504		0.606566	0.449852	0.858717	0.593767	0.612759	0.436089	0.626042	0.694194
	0.5615	1.19329	0.427613	1.13092	0.576959	1.79195	0.764753	0.670744		0.695825	0.272768	0.14145	0.216971	0.959231	0.561509	0.02702		0.5615	0.845437	0.609337	0.877341	0.611878	0.607143	0.873205	0.736513	0.592085		0.606566	0.466157	0.858717	0.955007	0.626719	0.436089	0.626042	0.689667
	0.5625	1.19329	0.427613	0.916657	0.576959	1.79195	0.764753	0.670744		0.695825	0.272768	0.14145	0.264391	0.926695	0.561509	0.02702		0.5625	0.833805	0.614794	0.96281	0.617382	0.607143	0.864827	0.736513	0.561708		0.606566	0.469677	0.858717	0.774947	0.626719	0.467709	0.657786	0.7098
	0.5635	1.19329	0.427613	0.916657	0.576959	1.70314	0.767133	0.670744		0.695825	0.272768	0.14145	0.261445	0.914913	0.576386	0.02702		0.5635	0.83511	0.616969	0.981574	0.609975	0.607143	0.866671	0.717859	0.572311		0.606566	0.469677	0.828551	0.523991	0.626719	0.460354	0.642394	0.75443
	0.5645	1.18642	0.680011	0.916657	0.576959	1.69507	0.751068	0.670744		0.745585	0.272768	0.14145	0.261445	0.914913	0.568146	0.02702		0.5645	0.83511	0.570662	0.96937	0.599009	0.607143	0.876397	0.69907	0.572311		0.807921	0.469677	0.828551	0.499945	0.513836	0.460354	0.642394	0.746121
	0.5655	1.18642	0.680011	0.916657	0.576959	1.72414	0.751487	0.670744		0.904339	0.272768	0.14145	0.261445	0.876991	0.514106	0.02702		0.5655	0.83511	0.570662	0.96937	0.604205	0.607143	0.826208	0.748779	0.571019		0.807921	0.470458	0.834787	0.499945	0.38356	0.451154	0.642394	0.746121
	0.5665	1.18642	0.680011	0.916657	0.576959	1.54422	0.751487	0.670744		0.904339	0.272768	0.14145	0.261445	0.876991	0.537471	0.02702		0.5665	0.83511	0.570662	0.986303	0.60809	0.636016	0.826208	0.738374	0.559582		0.807921	0.415739	0.872678	0.499945	0.38356	0.451154	0.642394	0.746121
	0.5675	1.18779	0.680011	0.916657	0.577121	1.51997	0.751487	0.670744		0.904339	0.272768	0.14145	0.261445	0.874434	0.537471	0.02702		0.5675	0.83511	0.593586	0.986303	0.618934	0.604803	0.826208	0.752203	0.559582		0.62946	0.415739	0.872678	0.762829	0.38356	0.451154	0.642394	0.715839
	0.5685	1.18779	0.432479	0.916657	0.577121	1.5798	0.771507	0.670744		0.904339	0.272768	0.14145	0.261445	0.874434	0.537471	0.02702		0.5685	0.844188	0.562543	1.00713	0.62591	0.604803	0.826208	0.752203	0.605861		0.914206	0.415739	0.905238	0.551088	0.204282	0.451154	0.642394	0.744185
	0.5695	1.11955	0.432479	0.916657	0.577121	1.58289	0.75575	0.670744		0.904339	0.272768	0.14145	0.261445	0.874434	0.537471	0.02702		0.5695	0.834066	0.610063	1.00713	0.63819	0.604803	0.826208	0.752203	0.605861		0.914206	0.415739	0.970499	0.500353	0.204282	0.451154	0.642394	0.744185
	0.5705	1.11955	0.432479	0.916657	0.577121	1.58289	0.75575	0.663444		0.98861	0.272768	0.123926	0.261445	0.863812	0.586783	0.02702		0.5705	0.862783	0.60975	0.934629	0.643853	0.596334	0.834645	0.770714	0.596182		0.914206	0.415739	0.970499	0.428237	0.204282	0.466057	0.658403	0.722101
	0.5715	1.11955	0.432479	0.916657	0.577121	1.58289	0.758537	0.663444		1.10445	0.289684	0.123926	0.261445	0.863812	0.586783	0.02702		0.5715	0.850341	0.546796	0.934697	0.652611	0.596334	0.782137	0.770714	0.581399		0.886631	0.415739	0.937275	0.428237	0.204282	0.464847	0.661552	0.722101
	0.5725	1.10444	0.432479	0.916657	0.577121	1.58289	0.758537	0.663444		1.10445	0.289684	0.123926	0.261445	0.880394	0.592413	0.02702		0.5725	0.845636	0.546796	0.95273	0.650886	0.676944	0.782137	0.699979	0.594453		0.942056	0.402081	0.922856	0.443538	0.204282	0.448574	0.661552	0.745455
	0.5735	1.21333	0.432479	0.916657	0.572524	1.58911	0.758537	0.643413		1.135	0.289684	0.123926	0.261445	0.891419	0.58233	0.02702		0.5735	0.845636	0.546796	0.938039	0.650886	0.750762	0.840292	0.69411	0.584665		0.999658	0.400757	0.875972	0.443538	0.204282	0.448574	0.661552	0.767876
	0.5745	1.21333	0.432479	0.916657	0.572524	1.58911	0.75664	0.643413		1.135	0.289684	0.123926	0.261445	0.9046	0.601966	0.02702		0.5745	0.845636	0.546796	0.940178	0.64965	0.631871	0.872642	0.69411	0.590252		1.05529	0.400757	0.910965	0.490173	0.204282	0.466095	0.687146	0.767876
	0.5755	1.16515	0.432479	0.916657	0.572524	1.55843	0.760679	0.643413		1.135	0.289684	0.123926	0.261445	0.933047	0.601966	0.02702		0.5755	0.845636	0.546796	0.98742	0.64965	0.631871	0.970061	0.69411	0.535911		1.05529	0.400757	0.910965	0.490173	0.204282	0.466095	0.687146	0.773553
	0.5765	1.16515	0.432479	0.916657	0.572524	1.71156	0.777475	0.643413		1.135	0.289684	0.123926	0.261445	0.933047	0.573921	0.02702		0.5765	0.845636	0.546796	0.961832	0.64965	0.631871	0.970061	0.69411	0.535911		1.04827	0.420417	0.900624	0.47835	0.204282	0.466299	0.687146	0.758974
	0.5775	1.16515	0.432479	0.916657	0.572524	1.71609	0.745714	0.643413		1.135	0.297938	0.123926	0.261445	0.933047	0.573921	0.02702		0.5775	0.835455	0.537852	0.961832	0.64965	0.631871	1.01228	0.69411	0.533406		1.0667	0.420417	0.900624	0.424121	0.204282	0.468539	0.685928	0.727219
	0.5785	1.19111	0.623399	0.916657	0.572524	1.66693	0.745714	0.622285		1.135	0.297938	0.123926	0.261445	0.944491	0.573921	0.02702		0.5785	0.854983	0.537852	0.940796	0.64965	0.753966	1.01228	0.68386	0.535088		1.0667	0.420417	0.900624	0.506556	0.204282	0.499742	0.685928	0.701354
	0.5795	1.19111	0.623399	0.916657	0.572524	1.66693	0.745714	0.622285		1.1116	0.297938	0.123926	0.257305	0.925091	0.518721	0.02702		0.5795	0.854983	0.526063	0.940796	0.64965	0.753966	0.96595	0.68386	0.544914		1.08582	0.441507	0.887314	0.506556	0.204282	0.499742	0.672216	0.699728
	0.5805	1.19111	0.623399	0.916657	0.572524	1.68215	0.735255	0.622285		1.1116	0.297938	0.123926	0.257305	0.932872	0.518721	0.02702		0.5805	0.854983	0.526063	0.93247	0.662053	0.753966	0.96595	0.68386	0.55884		1.07333	0.415362	0.874358	0.546415	0.204282	0.499742	0.729944	0.673141
	0.5815	1.15189	0.641295	0.916657	0.567624	1.54386	0.735255	0.622285		0.87698	0.297938	0.123926	0.238184	0.932019	0.515096	0.02702		0.5815	0.854983	0.525039	0.93247	0.662053	0.753966	0.96595	0.68386	0.55884		1.07333	0.415362	0.874358	0.546415	0.204282	0.499742	0.729944	0.6841
	0.5825	1.15189	0.641295	0.916657	0.567624	1.54386	0.73246	0.622285		0.797082	0.297938	0.123926	0.238184	0.931823	0.502589	0.02702		0.5825	0.854983	0.525039	0.93247	0.704058	0.800028	0.951949	0.68386	0.55884		1.113	0.415362	0.901037	0.476136	0.204282	0.541974	0.729944	0.6841
	0.5835	1.15189	0.641295	0.916657	0.610343	1.54386	0.737683	0.622285		0.797082	0.297938	0.123926	0.238184	0.952107	0.503672	0.02702		0.5835	0.851573	0.525039	0.899073	0.702241	0.800028	0.889581	0.696299	0.594708		1.13262	0.415362	0.901037	0.659643	0.131098	0.541974	0.729944	0.6841
	0.5845	1.11204	0.641295	0.916657	0.569029	1.48298	0.737683	0.622285		0.797082	0.297938	0.123926	0.238184	0.952107	0.503672	0.02702		0.5845	0.851573	0.525039	0.899073	0.702241	0.800028	0.893875	0.696299	0.580064		1.13262	0.424631	0.901037	0.762253	0.131098	0.593166	0.729944	0.680507
	0.5855	1.11204	0.412013	0.916657	0.569029	1.57752	0.737683	0.622285		0.794728	0.297938	0.123926	0.238184	0.958409	0.503672	0.02702		0.5855	0.851573	0.522404	0.918031	0.696098	0.800028	0.91168	0.809556	0.595199		1.07926	0.424924	0.901037	0.623973	0.131098	0.593166	0.732746	0.680507
	0.5865	1.11204	0.412013	0.887544	0.569029	1.60904	0.737683	0.622285		0.794728	0.319713	0.123926	0.238184	0.958409	0.489331	0.02702		0.5865	0.851573	0.522404	0.960589	0.696098	0.800028	0.945468	0.809212	0.593837		1.06106	0.424924	0.928378	1.00952	0.131098	0.580581	0.732746	0.69932
	0.5875	1.12001	0.412013	0.887544	0.569029	1.64409	0.737683	0.622285		0.794728	0.319713	0.123926	0.238184	0.951985	0.489331	0.02702		0.5875	0.851573	0.534186	0.939142	0.696098	0.800028	0.926186	0.818541	0.604606		1.06106	0.424924	1.0265	0.943114	0.131098	0.580581	0.772378	0.69932
	0.5885	1.12001	0.412013	0.887544	0.569029	1.65141	0.737928	0.622285		0.794728	0.319713	0.123926	0.238184	0.951985	0.489331	0.02702		0.5885	0.851573	0.534186	1.00449	0.69425	0.848423	0.94014	0.820859	0.604606		1.06106	0.424924	1.0265	0.693067	0.131098	0.632231	0.772378	0.69932
	0.5895	1.12001	0.412013	0.887544	0.565354	1.51554	0.748916	0.622285		0.794728	0.319713	0.123926	0.238184	0.96602	0.489331	0.02702		0.5895	0.820671	0.582807	1.1374	0.664618	0.848423	0.911116	0.820859	0.625003		0.816207	0.403911	0.998616	0.788272	0.131098	0.693252	0.779636	0.676234
	0.5905	1.12001	0.412013	0.934053	0.565354	1.51554	0.748916	0.622285		0.794728	0.319713	0.123926	0.217414	0.965825	0.489331	0.02702		0.5905	0.843304	0.582807	1.1374	0.664618	0.848423	0.90316	0.820859	0.625003		0.816207	0.390193	0.926841	1.02578	0.131098	0.718431	0.809906	0.678297
	0.5915	1.09019	0.366438	0.934053	0.565354	1.51326	0.743607	0.622285		0.903342	0.319713	0.123926	0.217414	0.965825	0.489331	0.02702		0.5915	0.869749	0.59578	1.1374	0.671953	0.848423	0.912576	0.766115	0.559844		0.816207	0.394475	0.982823	0.524626	0.131098	0.718431	0.793084	0.669388
	0.5925	1.09019	0.366438	0.934053	0.565354	1.51326	0.736342	0.622285		0.903342	0.424233	0.123926	0.217414	0.965825	0.465404	0.02702		0.5925	0.869749	0.596689	1.15155	0.678985	0.848423	0.937769	0.766115	0.559844		0.816207	0.394475	0.952701	0.448153	0.131098	0.718431	0.741206	0.697916
	0.5935	1.00259	0.366438	1.03237	0.565354	1.5196	0.736342	0.622285		0.903342	0.424233	0.123926	0.217414	0.95775	0.465404	0.02702		0.5935	0.869749	0.617046	1.08071	0.715553	0.868402	0.946533	0.766115	0.559844		0.793345	0.386413	0.952701	0.448153	0.131098	0.724159	0.741206	0.697916
	0.5945	1.21648	0.366438	1.09665	0.565354	1.5338	0.736442	0.614769		0.903342	0.424233	0.123926	0.217414	0.966935	0.456732	0.02702		0.5945	0.869749	0.617046	1.0965	0.715553	0.868402	1.00847	0.79895	0.569303		0.943072	0.386413	0.932991	0.432768	0.131098	0.790781	0.731568	0.744523
	0.5955	1.21648	0.372154	1.15445	0.565354	1.5197	0.748345	0.614769		0.968679	0.424233	0.123926	0.217414	0.92643	0.456732	0.02702		0.5955	0.869749	0.617046	1.0965	0.711772	0.935649	1.00847	0.794741	0.569168		0.900274	0.369798	0.932991	0.432768	0.131098	0.692526	0.731568	0.792247
	0.5965	1.18638	0.372154	1.15445	0.565354	1.52937	0.730168	0.614769		0.968679	0.502691	0.123926	0.217414	0.92643	0.423307	0.02702		0.5965	0.880891	0.632705	1.07086	0.696399	0.935649	1.03697	0.794741	0.569168		0.907998	0.369798	0.872241	0.432768	0.131098	0.692526	0.678675	0.810412
	0.5975	1.18638	0.372154	1.15445	0.565354	1.55836	0.728841	0.651182		0.968679	0.502691	0.123926	0.217414	0.94263	0.423307	0.02702		0.5975	0.880891	0.635412	0.903761	0.700417	0.878471	1.04702	0.794741	0.543402		0.860235	0.424788	0.872241	0.442677	0.131098	0.672368	0.678675	0.781064
	0.5985	1.18638	0.372154	1.15445	0.565354	1.55836	0.702742	0.651182		0.968679	0.502691	0.123926	0.217414	0.94263	0.407813	0.02702		0.5985	0.880891	0.635412	0.954054	0.700417	0.878471	1.04702	0.774609	0.543402		0.860235	0.433002	0.847579	0.442677	0.131098	0.749641	0.678675	0.781064
	0.5995	1.1675	0.372154	1.15445	0.565354	1.69267	0.702742	0.651182		0.968679	0.467311	0.123926	0.217414	1.11411	0.407813	0.02702		0.5995	0.880891	0.635412	0.920593	0.700417	1.04437	1.04702	0.774609	0.542057		0.860235	0.418703	0.806442	0.445274	0.131098	0.749641	0.678675	0.781064
	0.6005	1.1675	0.372154	1.14827	0.565354	2.39688	0.698364	0.645194		0.968679	0.474545	0.123926	0.217414	1.11411	0.417279	0.02702		0.6005	0.880891	0.655563	0.920593	0.698185	1.08516	0.985892	0.756972	0.537627		0.724625	0.418703	0.824779	0.458068	0.131098	0.749641	0.65636	0.781064
	0.6015	1.1675	0.372154	1.14827	0.565354	2.39688	0.723601	0.645194		0.968679	0.496308	0.123926	0.217414	1.18264	0.417279	0.02702		0.6015	0.880891	0.687454	0.920593	0.708102	1.08516	0.985892	0.829178	0.545125		0.724625	0.418703	0.824779	0.477179	0.131098	0.758627	0.607028	0.701128
	0.6025	1.1675	0.389831	1.14827	0.565354	1.65076	0.741232	0.643621		1.01083	0.496308	0.123926	0.217414	1.19675	0.417279	0.02702		0.6025	0.880891	0.679426	0.949783	0.703652	1.08516	0.949559	0.829178	0.537223		0.724625	0.418703	0.743133	0.477179	0.131098	0.686524	0.607028	0.701128
	0.6035	1.1675	0.389831	1.14827	0.565354	1.6356	0.737089	0.654508		1.01083	0.496308	0.123926	0.217414	1.19154	0.489168	0.02702		0.6035	0.880891	0.679426	0.949783	0.703652	1.08516	0.949559	0.829724	0.540088		0.724625	0.418703	0.743133	0.473185	0.131098	0.686524	0.584108	0.701128
	0.6045	1.06022	0.389831	1.14827	0.565354	1.66972	0.737089	0.654508		0.944411	0.440083	0.123926	0.217414	1.17367	0.549829	0.02702		0.6045	0.880891	0.706299	0.964724	0.703652	1.08516	0.949559	0.815585	0.538428		0.724625	0.418703	0.772185	0.473461	0.131098	0.681766	0.616286	0.701128
	0.6055	1.07499	0.389831	1.14827	0.565354	1.54421	0.737089	0.654508		0.944411	0.407863	0.123926	0.217414	1.17367	0.549829	0.02702		0.6055	0.880891	0.738905	0.964724	0.66868	0.846757	0.949559	0.815585	0.540575		0.727694	0.418703	0.836717	0.473461	0.131098	0.576302	0.630435	0.701128
	0.6065	1.07499	0.389831	1.14827	0.565354	1.54421	0.737089	0.654508		0.898102	0.407863	0.123926	0.217414	1.17367	0.576241	0.02702		0.6065	0.880891	0.738905	0.971825	0.668085	0.680558	0.940638	0.724798	0.540575		0.793216	0.418703	0.843751	0.473461	0.131098	0.576302	0.630435	0.717721
	0.6075	1.01392	0.413944	1.16422	0.565354	1.54421	0.738551	0.654508		0.898102	0.412606	0.123926	0.217414	0.999597	0.633056	0.02702		0.6075	0.899819	0.738905	0.992495	0.653878	0.680558	0.936946	0.724798	0.53517		0.793216	0.421665	0.86742	0.495607	0.131098	0.68248	0.630435	0.76351
	0.6085	1.01392	0.413944	1.16422	0.565354	1.54421	0.738551	0.651747		0.971211	0.412606	0.123926	0.217414	0.999597	0.633056	0.02702		0.6085	0.924962	0.738905	0.992495	0.663159	0.547704	0.940597	0.724798	0.519727		0.77312	0.421665	0.90946	0.476752	0.131098	0.665916	0.630435	0.793903
	0.6095	1.01392	0.413944	1.16422	0.565354	1.74158	0.738551	0.651747		0.917523	0.412606	0.123926	0.217414	0.995607	0.633056	0.02702		0.6095	0.924962	0.674576	0.970468	0.663159	0.547704	0.953646	0.737492	0.52788		0.722004	0.417781	0.90946	0.503101	0.131098	0.549194	0.609808	0.842832
	0.6105	1.01392	0.499897	1.16422	0.565354	1.81909	0.732829	0.651747		0.917523	0.403384	0.123926	0.217414	0.947376	0.633056	0.02702		0.6105	0.924962	0.674576	0.970468	0.663159	0.547704	0.949061	0.726663	0.52788		0.857015	0.417781	0.916035	0.486935	0.131098	0.549194	0.609808	0.862631
	0.6115	1.01392	0.499897	1.16422	0.565354	1.80968	0.732829	0.651747		0.917523	0.403384	0.123926	0.221585	0.951114	0.624563	0.02702		0.6115	0.918127	0.654746	0.970468	0.663159	0.545144	0.923317	0.726663	0.513653		0.857015	0.407422	0.916035	0.423363	0.131098	0.549194	0.609808	0.862631
	0.6125	1.01392	0.499897	1.16422	0.565354	1.89559	0.774559	0.654929		0.917523	0.403384	0.123926	0.221585	0.951114	0.582578	0.02702		0.6125	0.918127	0.654746	1.02971	0.667041	0.545144	0.923317	0.724933	0.516086		0.857339	0.407422	0.916035	0.423363	0.131098	0.549194	0.609808	0.90873
	0.6135	1.01392	0.499897	1.16422	0.565354	1.85346	0.76178	0.654929		0.917523	0.403384	0.123926	0.221585	0.951114	0.742284	0.02702		0.6135	1.01235	0.665119	1.02971	0.662574	0.545144	0.923317	0.724933	0.516086		0.857339	0.407422	0.925842	0.423363	0.131098	0.549194	0.602955	0.863179
	0.6145	1.01392	0.499897	1.16422	0.565354	1.71486	0.745988	0.623065		0.917523	0.403384	0.123926	0.221585	0.951114	0.742284	0.02702		0.6145	1.01235	0.651297	1.02971	0.656945	0.545144	0.908317	0.691659	0.514506		0.783446	0.407422	0.973312	0.481877	0.131098	0.503057	0.599409	0.863179
	0.6155	1.01392	0.526364	1.16422	0.566398	1.67685	0.732469	0.623065		0.917523	0.403384	0.123926	0.221585	0.955609	0.764601	0.02702		0.6155	1.01235	0.65818	1.03524	0.651711	0.545144	0.916309	0.691659	0.514506		0.783446	0.407422	0.960485	0.481877	0.131098	0.503057	0.610925	0.863179
	0.6165	1.05717	0.526364	1.16422	0.571911	1.66951	0.732469	0.623065		0.917523	0.314961	0.123926	0.224261	0.947915	0.790518	0.02702		0.6165	1.01235	0.663792	1.11939	0.658001	0.545144	0.916309	0.785557	0.515344		0.646842	0.407422	0.962036	0.481877	0.131098	0.503057	0.610925	0.816663
	0.6175	1.05717	0.526364	1.30967	0.571911	1.66381	0.732469	0.648253		0.94669	0.314961	0.26653	0.224261	0.947915	0.790518	0.02702		0.6175	1.01235	0.674573	1.10352	0.658001	0.545144	0.986828	0.785557	0.513373		0.646842	0.407422	0.962036	0.492997	0.131098	0.484279	0.61839	0.72707
	0.6185	1.05717	0.526364	1.30967	0.571911	1.61417	0.732469	0.648253		0.94669	0.314961	0.26653	0.224261	0.981298	0.722837	0.02702		0.6185	1.01235	0.68985	1.04287	0.658001	0.545144	0.986828	0.785557	0.519267		0.646842	0.359445	0.977898	0.544189	0.131098	0.472408	0.61839	0.721828
	0.6195	1.05717	0.526364	1.30967	0.577251	1.55462	0.732469	0.648253		0.873988	0.314961	0.26653	0.224261	0.993622	0.722837	0.02702		0.6195	1.01974	0.707745	1.04287	0.658001	0.552022	1.00561	0.785557	0.527221		0.55689	0.408386	0.965167	0.507613	0.131098	0.476871	0.61839	0.721828
	0.6205	1.05693	0.633455	1.30967	0.577251	1.53309	0.732469	0.648253		0.873988	0.318176	0.26653	0.224261	0.993622	0.722837	0.02702		0.6205	1.0121	0.715219	1.03276	0.661019	0.537306	0.919893	0.818213	0.567366		0.55689	0.416916	0.965167	0.46731	0.131098	0.476871	0.655199	0.721828
	0.6215	1.05693	0.570965	1.30967	0.577251	1.52695	0.732469	0.648253		0.94964	0.318176	0.26653	0.224261	0.971699	0.722837	0.02702		0.6215	1.0121	0.715219	1.0339	0.665801	0.537306	0.91657	0.706372	0.572249		0.593253	0.423974	0.922341	0.485255	0.131098	0.476871	0.655199	0.739255
	0.6225	1.05693	0.570965	1.33518	0.577251	1.55182	0.732469	0.648253		0.94964	0.318176	0.26653	0.224261	0.971699	0.710255	0.02702		0.6225	1.0121	0.715219	1.03851	0.672577	0.537306	0.859598	0.706372	0.574521		0.593253	0.423611	0.954844	0.485255	0.125572	0.477319	0.655199	0.739255
	0.6235	1.04623	0.570965	1.33518	0.635322	1.59368	0.737689	0.648253		0.94964	0.318176	0.26653	0.224261	0.959571	0.625969	0.02702		0.6235	1.01441	0.717955	1.03851	0.672577	0.53129	0.859598	0.671664	0.568311		0.619472	0.423127	0.954844	0.492436	0.125572	0.438764	0.658551	0.766072
	0.6245	1.04623	0.570965	1.33518	0.630197	1.59899	0.771778	0.648253		0.94964	0.318176	0.26653	0.224261	0.959571	0.625969	0.02702		0.6245	1.06232	0.717955	1.00957	0.668615	0.447458	0.859598	0.671664	0.56279		0.619472	0.423127	0.954844	0.504309	0.309263	0.435689	0.690961	0.74927
	0.6255	1.04623	0.570965	1.33518	0.630197	1.59899	0.779028	0.648253		0.94964	0.325659	0.26653	0.224261	0.959571	0.625969	0.02702		0.6255	1.06232	0.717955	0.961915	0.668615	0.428664	0.870307	0.679063	0.556421		0.672172	0.434727	0.924046	0.551661	0.309263	0.435689	0.7166	0.74927
	0.6265	1.04623	0.570965	1.37792	0.630197	1.59899	0.779028	0.648253		0.94964	0.325659	0.26653	0.224261	0.965491	0.58661	0.02702		0.6265	1.06232	0.717955	1.00265	0.665724	0.428664	0.870307	0.667601	0.532176		0.670654	0.443772	0.979001	0.551661	0.309263	0.435689	0.7166	0.761494
	0.6275	1.04623	0.570965	1.37792	0.630197	1.59899	0.731502	0.650541		0.94964	0.325659	0.26653	0.224261	0.967286	0.58661	0.02702		0.6275	1.08763	0.687985	1.00265	0.659088	0.428664	0.870307	0.667601	0.536343		0.670654	0.641529	0.979001	0.48834	0.309263	0.426348	0.7166	0.799722
	0.6285	1.04623	0.570965	1.37792	0.630197	1.64529	0.741749	0.650541		0.94964	0.325659	0.26653	0.224261	0.948567	0.644219	0.02702		0.6285	1.08763	0.655934	1.01045	0.659088	0.428664	0.848519	0.670092	0.535119		0.670654	0.641529	0.979001	0.48834	0.14931	0.426348	0.7166	0.799722
	0.6295	1.04623	0.570965	1.37792	0.630197	1.64657	0.741749	0.650541		0.9933	0.325659	0.26653	0.224261	0.948567	0.668715	0.02702		0.6295	1.08763	0.655934	1.01045	0.659088	0.536269	0.827977	0.67456	0.537306		0.670654	0.594648	0.948886	0.532951	0.14931	0.426348	0.7166	0.886598
	0.6305	1.04623	0.570965	1.37792	0.630197	1.75467	0.74371	0.650541		0.9933	0.325659	0.26653	0.224261	0.948567	0.686892	0.02702		0.6305	1.08763	0.678113	1.01045	0.659088	0.48302	0.827977	0.67456	0.530623		0.670654	0.594648	0.894475	0.532951	0.14931	0.426348	0.7166	0.883353
	0.6315	1.06072	0.570965	1.37792	0.630197	1.80408	0.74371	0.650541		0.844388	0.316767	0.26653	0.224261	0.938857	0.686892	0.02702		0.6315	1.08763	0.666195	1.05754	0.671919	0.48302	0.822456	0.67456	0.530623		0.670654	0.619204	0.894475	0.563189	0.14931	0.421925	0.695583	0.883353
	0.6325	1.06072	0.570965	1.37792	0.630197	1.80408	0.757644	0.650541		0.844388	0.316767	0.26653	0.224261	0.960258	0.686892	0.02702		0.6325	1.08763	0.666195	1.08046	0.67766	0.48302	0.822456	0.68787	0.539684		0.595963	0.692832	0.894475	0.563189	0.14931	0.449144	0.695583	0.868913
	0.6335	1.06072	0.537759	1.37792	0.630197	1.87438	0.757644	0.650541		0.816651	0.316767	0.26653	0.224261	0.960258	0.616568	0.02702		0.6335	1.07666	0.666195	1.08046	0.67766	0.48302	0.790662	0.624806	0.549798		0.595963	0.692832	0.894475	0.55412	0.14931	0.449144	0.709021	0.862408
	0.6345	1.06072	0.537759	1.37792	0.630197	1.86409	0.792366	0.650541		0.841775	0.316767	0.26653	0.224261	0.957544	0.605143	0.02702		0.6345	1.07666	0.684155	1.08046	0.681103	0.48302	0.802494	0.624806	0.544759		0.562971	0.703608	1.147	0.565752	0.494864	0.461386	0.649587	0.871411
	0.6355	1.07183	0.537759	1.37792	0.607721	1.77607	0.794857	0.650541		0.841775	0.311306	0.26653	0.224261	0.971792	0.605143	0.02702		0.6355	1.07666	0.657599	1.08517	0.675825	0.48302	0.801209	0.624806	0.528624		0.593217	0.719982	1.09191	0.536639	0.494864	0.461386	0.649587	0.854109
	0.6365	0.94376	0.537759	1.45281	0.607721	1.77607	0.794857	0.650541		0.878733	0.311306	0.26653	0.187562	0.971792	0.549612	0.02702		0.6365	1.07666	0.657599	1.08354	0.675825	0.48302	0.775801	0.624806	0.534738		0.593217	0.72567	1.09191	0.514562	0.494864	0.458792	0.690008	0.836643
	0.6375	0.912984	0.504329	1.45281	0.607721	1.73062	0.780236	0.650541		0.878733	0.311306	0.26653	0.175253	0.973052	0.655695	0.02702		0.6375	1.07666	0.630579	1.08354	0.675825	0.48302	0.734274	0.624806	0.538356		0.593217	0.891224	1.09191	0.561078	0.494864	0.458792	0.690008	0.836643
	0.6385	0.947919	0.504329	1.46886	0.607721	1.66375	0.780236	0.650541		0.878733	0.299594	0.26653	0.175253	0.973052	0.655695	0.02702		0.6385	1.04833	0.630579	1.07903	0.691709	0.48302	0.734274	0.624806	0.538356		0.593217	0.697215	0.783611	0.545384	0.494864	0.458792	0.752601	0.821969
	0.6395	0.947919	0.520651	1.46886	0.607721	1.64323	0.780236	0.650541		0.878733	0.299594	0.26653	0.210439	0.977025	0.655695	0.02702		0.6395	1.04833	0.630579	1.07903	0.691709	0.48302	0.734274	0.577933	0.538356		0.602203	0.697215	0.79841	0.454823	0.494864	0.4454	0.780733	0.822585
	0.6405	0.947919	0.520651	1.46886	0.607721	1.71029	0.780236	0.640963		0.775885	0.299594	0.26653	0.210439	1.01962	0.655695	0.02702		0.6405	1.04833	0.630579	1.0549	0.686757	0.48302	0.747687	0.577933	0.529444		0.572808	0.697215	0.79841	0.454823	0.494864	0.444522	0.797282	0.822585
	0.6415	0.947919	0.520651	1.57198	0.607721	1.66394	0.780236	0.640963		0.775885	0.299594	0.26653	0.210439	1.01962	0.655695	0.02702		0.6415	1.04833	0.630579	1.07552	0.694939	0.48302	0.745714	0.621019	0.529444		0.501079	0.713405	0.824955	0.4913	0.171223	0.444522	0.782973	0.804336
	0.6425	1.04088	0.604676	1.70545	0.607721	1.67834	0.78645	0.640963		0.775885	0.320999	0.26653	0.210439	1.00369	0.655695	0.02702		0.6425	1.04833	0.630579	1.07915	0.694939	0.48302	0.745714	0.635377	0.52847		0.519866	0.710837	0.772336	0.448104	0.171223	0.45728	0.766972	0.768062
	0.6435	1.06816	0.604676	1.70545	0.607721	1.67834	0.76835	0.640963		0.775885	0.252866	0.26653	0.210439	1.00369	0.516816	0.02702		0.6435	1.04833	0.633249	1.08172	0.694939	0.48302	0.745714	0.648827	0.524477		0.519866	0.710837	0.81586	0.454643	0.171223	0.478405	0.766972	0.746291
	0.6445	1.06816	0.604676	1.64915	0.607721	1.67834	0.753984	0.640963		0.775885	0.252866	0.26653	0.210439	1.00369	0.516816	0.02702		0.6445	1.06318	0.62424	1.05351	0.703097	0.48302	0.745714	0.648827	0.524561		0.519866	0.802143	0.81586	0.454643	0.171223	0.480492	0.766972	0.746291
	0.6455	1.11894	0.604676	1.64915	0.607721	1.67294	0.753984	0.640963		0.775885	0.252866	0.26653	0.210439	1.00369	0.506526	0.02702		0.6455	1.06318	0.643695	1.0293	0.703097	0.48302	0.700439	0.648827	0.543993		0.519866	0.804386	0.81586	0.454643	0.171223	0.503956	0.710726	0.759233
	0.6465	1.11971	0.604676	1.64915	0.607721	1.67294	0.753984	0.660629		0.817931	0.252866	0.26653	0.210439	1.00369	0.507103	0.02702		0.6465	1.09782	0.643695	1.01331	0.703097	0.48302	0.675866	0.648827	0.543993		0.532737	0.734799	0.81586	0.394179	0.171223	0.498158	0.710726	0.759233
	0.6475	1.11971	0.604676	1.64915	0.607721	1.66725	0.762991	0.660629		0.817931	0.252866	0.26653	0.210439	0.990476	0.507103	0.02702		0.6475	1.09782	0.624763	1.01331	0.6998	0.48302	0.663035	0.648827	0.543993		0.567251	0.654142	0.96491	0.457008	0.171223	0.487006	0.710726	0.759233
	0.6485	1.11971	0.604676	1.64915	0.613164	1.59487	0.77628	0.656084		0.817931	0.252866	0.26653	0.210439	0.990476	0.507103	0.02702		0.6485	1.09782	0.605266	1.01331	0.711492	0.377759	0.680849	0.67962	0.552081		0.557032	0.676499	1.07641	0.457008	0.171223	0.487006	0.710726	0.759233
	0.6495	1.11971	0.604676	1.64915	0.638581	1.5891	0.77628	0.644162		0.817931	0.302573	0.26653	0.210439	0.970263	0.469457	0.02702		0.6495	1.05469	0.605266	0.95987	0.72152	0.377759	0.680849	0.685005	0.569426		0.557032	0.64663	1.07828	0.482115	0.140079	0.467855	0.710726	0.701638
	0.6505	1.16709	0.604676	1.64915	0.638581	1.58864	0.784902	0.661439		0.761694	0.302573	0.26653	0.210439	0.991587	0.469457	0.02702		0.6505	1.05469	0.605266	0.933024	0.729402	0.377759	0.680849	0.685005	0.57149		0.557032	0.64663	1.07828	0.555675	0.140079	0.565643	0.670904	0.765899
	0.6515	1.16709	0.604676	1.64915	0.638581	1.59428	0.784902	0.665825		0.761694	0.302573	0.26653	0.210439	0.991587	0.434553	0.02702		0.6515	1.074	0.605266	0.980321	0.729402	0.377759	0.696266	0.685005	0.57094		0.557032	0.737469	0.900629	0.625252	0.140079	0.565643	0.659933	0.782072
	0.6525	1.23557	0.610335	1.64915	0.638581	1.58308	0.790874	0.665825		0.761694	0.302573	0.26653	0.210439	0.991587	0.434553	0.02702		0.6525	1.03813	0.611857	0.980321	0.729402	0.377759	0.696266	0.694209	0.577779		0.557032	0.737469	0.900629	0.594746	0.140079	0.565643	0.659933	0.782072
	0.6535	1.23557	0.610335	1.46987	0.638581	1.58308	0.790874	0.665825		0.761694	0.302573	0.26653	0.210439	0.990173	0.434553	0.02702		0.6535	1.05038	0.611857	1.06588	0.715999	0.351336	0.69737	0.694209	0.572963		0.557032	0.725774	0.975981	0.570966	0.140079	0.565643	0.620902	0.782072
	0.6545	1.23557	0.658897	1.46987	0.643935	1.55791	0.790874	0.665825		0.761694	0.302573	0.099273	0.210439	0.990173	0.434553	0.02702		0.6545	1.05038	0.611857	1.06588	0.710508	0.351336	0.69737	0.694209	0.572219		0.557032	0.725774	0.975981	0.585184	0.140079	0.565643	0.620902	0.768494
	0.6555	1.23557	0.737188	1.46987	0.643935	1.59489	0.804504	0.657188		0.761694	0.302573	0.099273	0.210439	0.986396	0.434553	0.02702		0.6555	1.02088	0.632034	1.06588	0.704716	0.351336	0.69737	0.694209	0.572219		0.561867	0.647578	0.952712	0.596349	0.140079	0.528191	0.620902	0.761074
	0.6565	1.16775	0.737188	1.46987	0.643935	1.68668	0.79409	0.657188		0.761694	0.302573	0.099273	0.210439	0.986396	0.400805	0.02702		0.6565	1.02088	0.653701	1.06588	0.704716	0.351336	0.701077	0.694209	0.572219		0.664105	0.647578	0.945823	0.559564	0.140079	0.474996	0.629051	0.740316
	0.6575	1.16775	0.643149	1.46987	0.651586	1.68668	0.79224	0.657188		0.911518	0.302573	0.102574	0.210439	0.974163	0.400805	0.02702		0.6575	1.06418	0.653701	1.06588	0.717548	0.351336	0.704976	0.694209	0.580988		0.664105	0.558808	0.945823	0.532134	0.140079	0.474996	0.643716	0.734183
	0.6585	1.14884	0.643149	1.46987	0.651586	1.69349	0.79224	0.657188		1.26316	0.302573	0.102574	0.210439	0.974163	0.400805	0.02702		0.6585	1.06418	0.653701	1.00406	0.693006	0.351336	0.722241	0.676997	0.549642		0.664105	0.558808	0.974945	0.532134	0.140079	0.465288	0.643716	0.734183
	0.6595	1.14884	0.643149	1.46987	0.651586	1.73301	0.796591	0.667889		1.26316	0.302573	0.102574	0.210439	1.18762	0.400805	0.02702		0.6595	1.09465	0.685889	1.00406	0.693006	0.36298	0.679362	0.703376	0.596767		0.664105	0.520734	1.0239	0.61661	0.140079	0.486984	0.643716	0.734183
	0.6605	1.14884	0.647693	1.46987	0.651586	1.80402	0.796591	0.667889		1.26316	0.302573	0.102574	0.210439	1.18762	0.449678	0.02702		0.6605	1.09465	0.685889	0.921072	0.705064	0.36298	0.681043	0.703376	0.586742		0.690491	0.520734	1.0239	0.597785	0.140079	0.486984	0.643716	0.734183
	0.6615	1.14884	0.647693	1.48072	0.651586	1.74728	0.796591	0.667889		1.26316	0.302573	0.102574	0.210439	1.21861	0.449678	0.02702		0.6615	1.09465	0.685889	0.946027	0.712877	0.36298	0.681043	0.723218	0.582256		0.690491	0.530817	1.04514	0.562679	0.140079	0.486984	0.643716	0.734183
	0.6625	1.14884	0.647693	1.48072	0.651586	1.75169	0.798643	0.667889		1.64351	0.302573	0.102574	0.210439	1.18689	0.449678	0.02702		0.6625	1.08977	0.722202	0.909816	0.709621	0.36298	0.681043	0.723218	0.572279		0.690491	0.581678	1.03771	0.533541	0.140079	0.514696	0.643799	0.755046
	0.6635	1.2529	0.647693	1.48072	0.674804	1.66429	0.794499	0.667889		1.64351	0.302573	0.102574	0.210439	1.0236	0.449678	0.02702		0.6635	1.08977	0.774968	0.906259	0.709621	0.36298	0.698745	0.741504	0.572279		0.690491	0.656543	1.03771	0.533541	0.140079	0.518605	0.62133	0.767783
	0.6645	1.2624	0.457663	1.48664	0.674804	1.6228	0.797227	0.667889		1.64351	0.302573	0.102574	0.210439	1.05849	0.449678	0.02702		0.6645	1.08977	0.772646	0.906259	0.709621	0.36298	0.698745	0.741504	0.577278		0.680494	0.656543	1.09973	0.492995	0.140079	0.518605	0.62133	0.74592
	0.6655	1.2624	0.457663	1.48664	0.674804	1.65552	0.79793	0.669413		1.40983	0.322753	0.102574	0.210439	1.08432	0.449678	0.02702		0.6655	1.08142	0.78093	0.906259	0.701212	0.36298	0.628299	0.756646	0.557784		0.713758	0.490751	1.05916	0.510172	0.140079	0.515849	0.62133	0.822542
	0.6665	1.30741	0.457663	1.48664	0.674804	1.65884	0.827517	0.669413		1.40983	0.322753	0.102574	0.210439	1.08432	0.575882	0.02702		0.6665	1.08142	0.799559	0.906259	0.699768	0.36298	0.628299	0.743845	0.561404		0.713758	0.490751	1.05612	0.528001	0.140079	0.48722	0.64118	0.822542
	0.6675	1.30741	0.457663	1.48664	0.674804	1.65884	0.827517	0.669413		1.37911	0.322753	0.102574	0.210439	1.08432	0.6176	0.02702		0.6675	1.07708	0.799559	0.915424	0.699768	0.36298	0.630083	0.726221	0.558056		0.713758	0.437631	0.950747	0.528001	0.140079	0.48722	0.64118	0.822542
	0.6685	1.30741	0.419781	1.48664	0.674804	1.71437	0.827517	0.669413		1.37911	0.333583	0.102574	0.210439	1.08432	0.6176	0.02702		0.6685	1.07708	0.77549	0.915424	0.699768	0.36298	0.615135	0.723821	0.549932		0.699274	0.437631	0.950747	0.528001	0.140079	0.48722	0.659119	0.827143
	0.6695	1.30741	0.381558	1.48664	0.674804	1.72914	0.800023	0.669413		0.989883	0.333583	0.102574	0.210439	1.0828	0.6176	0.02702		0.6695	1.07708	0.793295	0.903858	0.704991	0.36298	0.631199	0.723821	0.576312		0.670628	0.437631	0.866221	0.562657	0.140079	0.457902	0.67612	0.832582
	0.6705	1.26382	0.381558	1.54615	0.639054	1.72914	0.800023	0.677845		0.972254	0.333583	0.102574	0.210439	1.05903	0.6176	0.02702		0.6705	1.10523	0.794374	0.973135	0.708022	0.36298	0.653464	0.723821	0.576312		0.690397	0.437631	0.852226	0.605168	0.140079	0.457902	0.677688	0.789752
	0.6715	1.26382	0.381558	1.54615	0.639054	1.71463	0.800023	0.677845		1.08311	0.342349	0.102574	0.210439	0.994476	0.589595	0.02702		0.6715	1.10523	0.806259	0.947965	0.70505	0.36298	0.653464	0.727683	0.566155		0.690397	0.437631	0.852226	0.682864	0.140079	0.457902	0.679653	0.789752
	0.6725	1.3143	0.381558	1.54615	0.639054	1.65994	0.793729	0.698609		1.08311	0.342349	0.102574	0.210439	0.994476	0.589595	0.02702		0.6725	1.10523	0.808884	0.962225	0.712804	0.36298	0.653464	0.750181	0.566155		0.567032	0.437631	0.810341	0.682864	0.140079	0.501174	0.679653	0.789752
	0.6735	1.3143	0.381558	1.53313	0.639054	1.57375	0.793729	0.698609		1.08311	0.342349	0.102574	0.210439	0.994476	0.537082	0.02702		0.6735	1.10523	0.785262	0.962225	0.701042	0.36298	0.653464	0.750181	0.574891		0.567032	0.520509	0.810341	0.595715	0.140079	0.507815	0.679653	0.755238
	0.6745	1.3143	0.381558	1.53313	0.639054	1.53781	0.794047	0.72339		1.08311	0.342349	0.102574	0.210439	0.994476	0.537082	0.02702		0.6745	1.10523	0.81894	0.969881	0.701042	0.36298	0.653464	0.77502	0.574891		0.624098	0.445835	0.764644	0.566662	0.140079	0.507815	0.670312	0.736522
	0.6755	1.3143	0.395725	1.53313	0.639054	1.47507	0.776093	0.692412		1.08311	0.346919	0.102574	0.210439	0.994476	0.537082	0.02702		0.6755	1.09977	0.81894	0.975175	0.701042	0.354549	0.67793	0.77502	0.521358		0.603954	0.445835	0.803121	0.454198	0.140079	0.507815	0.670312	0.741762
	0.6765	1.29722	0.395725	1.58472	0.668251	1.48323	0.776093	0.692412		1.08311	0.346919	0.102574	0.210439	1.03958	0.485205	0.02702		0.6765	1.0621	0.827373	0.927017	0.701042	0.354549	0.678005	0.856928	0.506896		0.673553	0.445835	0.828112	0.451038	0.140079	0.507815	0.634705	0.773232
	0.6775	1.29722	0.395725	1.58472	0.668251	1.4936	0.776093	0.692412		1.08311	0.343226	0.102574	0.210439	1.03958	0.418124	0.02702		0.6775	1.06963	0.827373	0.935261	0.701042	0.354549	0.704974	0.843249	0.506896		0.673553	0.445835	0.828112	0.451038	0.140079	0.507815	0.639105	0.773232
	0.6785	1.38935	0.395725	1.58472	0.668251	1.74956	0.789532	0.692412		1.01361	0.343226	0.102574	0.210439	1.1438	0.438642	0.02702		0.6785	1.05141	0.77075	0.935261	0.701042	0.354549	0.704984	0.843249	0.506896		0.673553	0.445835	0.821208	0.451038	0.140079	0.507815	0.639105	0.786927
	0.6795	1.38935	0.395725	1.58472	0.668251	1.76671	0.797083	0.692412		1.01361	0.267831	0.102574	0.210439	1.12549	0.438642	0.02702		0.6795	1.04231	0.762774	0.966589	0.701042	0.354549	0.70692	0.800584	0.50352		0.673553	0.424998	0.833507	0.468525	0.140079	0.553168	0.630511	0.786927
	0.6805	1.51418	0.453946	1.58472	0.668251	1.76671	0.797083	0.704313		1.01361	0.267831	0.102574	0.210439	1.10128	0.489992	0.02702		0.6805	1.04231	0.683204	0.94164	0.701042	0.354549	0.675279	0.800584	0.531473		0.733025	0.424998	0.833507	0.468525	0.140079	0.526139	0.630511	0.793354
	0.6815	1.45064	0.453946	1.66917	0.683717	1.76671	0.792385	0.704313		1.01361	0.267831	0.102574	0.210439	1.11329	0.489992	0.02702		0.6815	1.03502	0.683204	0.94164	0.685639	0.348979	0.677247	0.777077	0.531473		0.733025	0.424998	0.833507	0.468451	0.140079	0.526139	0.630511	0.766606
	0.6825	1.46783	0.453946	1.76019	0.683717	1.63597	0.792385	0.704313		1.01361	0.267831	0.102574	0.210439	1.01332	0.472345	0.02702		0.6825	1.03502	0.66627	0.915973	0.693156	0.348979	0.677247	0.768942	0.536788		0.656888	0.424998	0.803658	0.596299	0.140079	0.526139	0.642526	0.766606
	0.6835	1.36876	0.453946	1.76019	0.683717	1.63597	0.801571	0.704313		1.02877	0.267831	0.102574	0.210439	1.01332	0.472345	0.02702		0.6835	1.03502	0.673675	0.92473	0.701842	0.348979	0.677247	0.768942	0.536788		0.656888	0.424998	0.841964	0.55807	0.140079	0.526139	0.631852	0.766606
	0.6845	1.36876	0.453946	1.76019	0.666344	1.68002	0.801769	0.704313		1.02877	0.267831	0.102574	0.210439	1.01332	0.512698	0.02702		0.6845	1.02788	0.673675	0.92473	0.691084	0.348979	0.677247	0.768942	0.527603		0.656888	0.424998	0.841964	0.449065	0.140079	0.526139	0.66215	0.77606
	0.6855	1.37459	0.5479	1.5193	0.695236	1.58662	0.813959	0.682547		0.889238	0.267831	0.102574	0.210439	1.08035	0.502106	0.02702		0.6855	1.02788	0.673473	0.911178	0.691084	0.348979	0.675425	0.786401	0.527446		0.621775	0.40399	0.841964	0.475297	0.140079	0.526139	0.66215	0.735231
	0.6865	1.36182	0.5479	1.5193	0.695236	1.63443	0.779893	0.682547		0.945943	0.237415	0.102574	0.210439	1.0732	0.502236	0.02702		0.6865	1.02788	0.673473	0.917474	0.691084	0.348979	0.675425	0.786401	0.535527		0.621775	0.407917	0.841964	0.523419	0.140079	0.502366	0.66215	0.729146
	0.6875	1.32342	0.552857	1.5193	0.695236	1.6316	0.778307	0.682547		1.00665	0.237415	0.102574	0.210439	1.0732	0.502236	0.02702		0.6875	1.03397	0.65696	0.916586	0.691084	0.312224	0.675425	0.786401	0.535527		0.621775	0.407917	1.00282	0.523419	0.140079	0.499333	0.648362	0.758078
	0.6885	1.32342	0.552857	1.5193	0.695236	1.6316	0.772454	0.682547		1.00665	0.237415	0.102574	0.210439	1.19058	0.502236	0.02702		0.6885	1.03397	0.65696	0.902832	0.66901	0.312224	0.675017	0.822758	0.533178		0.63225	0.423092	1.02571	0.528722	0.140079	0.491162	0.673863	0.784894
	0.6895	1.27987	0.552857	1.5193	0.695236	1.64952	0.772454	0.683343		1.00665	0.237415	0.102574	0.210439	1.19575	0.518908	0.02702		0.6895	1.03397	0.701065	0.902832	0.672839	0.312224	0.732709	0.795519	0.530498		0.63225	0.423092	0.878659	0.528722	0.140079	0.491162	0.673863	0.777715
	0.6905	1.27987	0.552857	1.5193	0.695236	1.63587	0.772454	0.652852		1.00665	0.237415	0.102574	0.210439	1.19575	0.477265	0.02702		0.6905	1.03397	0.662057	0.907737	0.672839	0.312224	0.74299	0.722899	0.530498		0.63225	0.423092	0.878659	0.528722	0.282975	0.491162	0.673863	0.79125
	0.6915	1.27987	0.552857	1.55105	0.695236	1.58261	0.772454	0.642084		1.00665	0.237415	0.102574	0.210439	1.00009	0.477265	0.02702		0.6915	1.03397	0.662142	0.907737	0.684371	0.312224	0.733619	0.722899	0.540877		0.63225	0.44514	0.878659	0.617716	0.282975	0.464571	0.657176	0.760391
	0.6925	1.27987	0.552857	1.55105	0.695236	1.54318	0.772454	0.642084		1.00665	0.237415	0.102574	0.210439	0.995933	0.477265	0.02702		0.6925	1.03397	0.662142	0.907737	0.663754	0.312224	0.702594	0.722899	0.540877		0.63225	0.458717	0.878659	0.581223	0.282975	0.464571	0.656023	0.760391
	0.6935	1.27987	0.552857	1.55105	0.695236	1.54318	0.773557	0.648863		1.00665	0.237415	0.102574	0.193237	1.05796	0.451614	0.02702		0.6935	1.03397	0.662142	0.873878	0.685566	0.312224	0.702594	0.722899	0.538607		0.604161	0.458717	0.878659	0.581223	0.282975	0.471349	0.666943	0.760391
	0.6945	1.30662	0.527211	1.55105	0.695236	1.59802	0.773557	0.648863		1.00665	0.237415	0.102574	0.193237	1.05796	0.451614	0.02702		0.6945	1.03397	0.630828	0.881405	0.685566	0.312224	0.731435	0.722899	0.539156		0.579233	0.458717	0.903256	0.62878	0.282975	0.477584	0.712736	0.760391
	0.6955	1.30662	0.527211	1.55105	0.695236	1.61426	0.786436	0.648863		0.9599	0.237415	0.102574	0.188054	1.05796	0.451614	0.02702		0.6955	1.00063	0.630828	0.876681	0.686394	0.312224	0.735734	0.704086	0.534855		0.579233	0.486468	0.926673	0.648511	0.282975	0.477584	0.712736	0.760391
	0.6965	1.30662	0.504942	1.55105	0.695236	1.62936	0.794028	0.648863		0.9599	0.237415	0.102574	0.188054	1.05307	0.451614	0.02702		0.6965	1.00063	0.630684	0.871072	0.675076	0.417358	0.735734	0.684369	0.53162		0.565724	0.486468	0.930522	0.611972	0.265587	0.477584	0.712736	0.726136
	0.6975	1.30662	0.504942	1.55105	0.704088	1.62151	0.770328	0.648863		0.9599	0.237415	0.102574	0.188054	1.07742	0.451614	0.02702		0.6975	1.01029	0.582954	0.871072	0.675076	0.417358	0.712268	0.708256	0.531775		0.558428	0.490947	0.930522	0.565279	0.265587	0.498012	0.764489	0.74421
	0.6985	1.33379	0.504942	1.55105	0.704088	1.61315	0.76503	0.648863		0.9599	0.237415	0.102574	0.188054	1.01431	0.444305	0.02702		0.6985	1.01029	0.582954	0.871072	0.674205	0.417358	0.712268	0.895248	0.531775		0.558428	0.490947	0.930522	0.56213	0.265587	0.465371	0.764489	0.732799
	0.6995	1.33379	0.504942	1.55105	0.704088	1.56958	0.76503	0.648863		0.9599	0.237415	0.102574	0.188054	1.01431	0.406414	0.02702		0.6995	0.990981	0.582954	0.880066	0.674205	0.417358	0.712268	0.913697	0.530362		0.558428	0.489521	0.954675	0.56213	0.265587	0.465371	0.78595	0.76168
	0.7005	1.33379	0.504942	1.55105	0.704088	1.56958	0.76503	0.648863		0.938215	0.237415	0.102574	0.188054	1.02217	0.406414	0.02702		0.7005	0.990981	0.582954	0.905417	0.674205	0.417358	0.656653	0.913697	0.530362		0.551542	0.489521	0.954675	0.59577	0.32528	0.465371	0.769821	0.779876
	0.7015	1.23183	0.61479	1.55105	0.704088	1.56958	0.76503	0.648863		0.938215	0.237415	0.102574	0.188054	1.02217	0.406414	0.02702		0.7015	0.990981	0.626651	0.905417	0.674205	0.417358	0.680717	0.900976	0.539427		0.551542	0.475461	0.972299	0.581593	0.32528	0.465371	0.78367	0.785128
	0.7025	1.23183	0.61479	1.55105	0.704088	1.56958	0.726399	0.648863		0.980755	0.237415	0.102574	0.180495	0.995216	0.406414	0.02702		0.7025	0.990981	0.62258	0.937936	0.674205	0.417358	0.680717	0.900976	0.53912		0.551542	0.475461	0.95962	0.581593	0.32528	0.465371	0.729705	0.817109
	0.7035	1.23183	0.61479	1.55105	0.704088	1.55747	0.740971	0.648863		0.980755	0.237415	0.102574	0.180495	0.995216	0.406414	0.02702		0.7035	0.990981	0.62258	0.937936	0.674205	0.417358	0.657216	0.900976	0.53912		0.551542	0.475461	0.988194	0.612348	0.32528	0.465371	0.659756	0.858606
	0.7045	1.23183	0.61479	1.4304	0.724016	1.53271	0.740971	0.648863		0.980755	0.31368	0.102574	0.180495	0.995216	0.392826	0.02702		0.7045	0.990981	0.637895	0.914175	0.675109	0.417358	0.597896	0.752156	0.53912		0.652781	0.475461	0.934885	0.612348	0.32528	0.462264	0.659756	0.858606
	0.7055	1.26137	0.61479	1.20452	0.724016	1.57038	0.740971	0.648863		0.980755	0.31368	0.102574	0.180194	1.05011	0.462606	0.02702		0.7055	0.990981	0.637895	0.923771	0.675109	0.414206	0.597896	0.752156	0.529228		0.652781	0.475461	0.934885	0.597255	0.32528	0.462264	0.659756	0.839446
	0.7065	1.1728	0.61479	1.20452	0.724016	1.70471	0.725182	0.648863		0.980755	0.31368	0.102574	0.180194	0.983783	0.462606	0.02702		0.7065	0.990981	0.623049	0.923771	0.679888	0.422182	0.597896	0.718157	0.588311		0.64752	0.475461	0.922026	0.594624	0.32528	0.475149	0.692258	0.839446
	0.7075	1.137	0.61479	1.20452	0.724016	1.70004	0.731684	0.648863		0.980755	0.31368	0.102574	0.180194	0.983783	0.462606	0.02702		0.7075	0.990981	0.623049	0.902518	0.679888	0.422182	0.597896	0.718157	0.588311		0.64752	0.475461	0.921255	0.629226	0.32528	0.475149	0.731423	0.772427
	0.7085	1.137	0.61479	1.20452	0.724016	1.84104	0.731684	0.648863		0.980755	0.31368	0.102574	0.180194	0.983783	0.442922	0.02702		0.7085	0.958846	0.623049	0.902006	0.679888	0.458674	0.597896	0.718157	0.585863		0.637154	0.497672	0.921255	0.615323	0.32528	0.542841	0.754928	0.763957
	0.7095	1.137	0.574668	1.20452	0.724016	1.84104	0.731684	0.653751		1.06216	0.31368	0.102574	0.180194	1.01091	0.410616	0.02702		0.7095	0.958846	0.598549	0.916104	0.711906	0.335038	0.60121	0.718157	0.591211		0.637154	0.491442	0.949295	0.609711	0.32528	0.542841	0.763471	0.763957
	0.7105	1.137	0.669219	1.20452	0.724016	1.65257	0.724396	0.642252		1.06216	0.31368	0.102574	0.174255	1.00339	0.410616	0.02702		0.7105	0.958846	0.627878	0.913036	0.695016	0.335038	0.60121	0.718157	0.591211		0.637154	0.438357	0.94365	0.650576	0.371879	0.529663	0.763471	0.779302
	0.7115	1.11724	0.669219	1.20452	0.724016	1.67469	0.740792	0.642252		1.09962	0.31368	0.102574	0.174255	1.00339	0.540414	0.02702		0.7115	0.978858	0.627878	0.913036	0.695016	0.335038	0.588712	0.718157	0.591211		0.727346	0.438357	0.94365	0.650576	0.371879	0.592373	0.787058	0.76012
	0.7125	1.11724	0.596415	1.20452	0.747868	1.66179	0.740792	0.636104		1.09962	0.31368	0.102574	0.174255	1.00339	0.540414	0.02702		0.7125	0.978858	0.627878	0.913036	0.691264	0.335038	0.652966	0.718157	0.591211		0.727346	0.438357	0.94365	0.612404	0.371879	0.646165	0.804795	0.744325
	0.7135	1.11724	0.596415	1.20452	0.737266	1.67238	0.740792	0.636104		1.24453	0.31368	0.102574	0.174255	1.01865	0.540414	0.02702		0.7135	0.978858	0.627878	0.908335	0.67012	0.462747	0.652966	0.778813	0.598676		0.727346	0.469132	0.915987	0.53586	0.236794	0.638934	0.81441	0.744325
	0.7145	1.11724	0.596415	1.20452	0.737266	1.67238	0.740792	0.636104		1.24453	0.230029	0.102574	0.174255	1.02697	0.484071	0.02702		0.7145	0.978858	0.627878	0.913877	0.687787	0.539715	0.647451	0.815641	0.598676		0.727346	0.485388	0.908566	0.556092	0.236794	0.638934	0.81441	0.756483
	0.7155	1.11724	0.596415	1.20452	0.737266	2.09601	0.739563	0.649317		1.24453	0.230029	0.102574	0.174255	1.01164	0.488106	0.02702		0.7155	0.98447	0.627878	0.913877	0.687787	0.539715	0.647451	0.815641	0.611271		0.530338	0.485388	0.908566	0.570587	0.236794	0.573323	0.81441	0.750999
	0.7165	1.11724	0.596415	1.20452	0.737266	1.9733	0.728478	0.649317		1.24453	0.230029	0.102574	0.174255	1.03185	0.387785	0.02702		0.7165	0.98447	0.629083	0.913877	0.672822	0.539715	0.643039	0.815641	0.616985		0.530338	0.485388	0.968159	0.546033	0.236794	0.599365	0.791442	0.747123
	0.7175	1.11148	0.596415	1.40477	0.737266	1.9907	0.722218	0.649317		1.24453	0.230029	0.102574	0.174255	1.02769	0.402891	0.02702		0.7175	0.974949	0.590629	0.949558	0.672822	0.539715	0.643039	0.815641	0.641983		0.530338	0.485388	0.968159	0.566108	0.236794	0.599365	0.762353	0.723742
	0.7185	1.11148	0.543056	1.40477	0.737266	1.53256	0.718001	0.649317		1.17616	0.230029	0.102574	0.174255	1.02769	0.424997	0.02702		0.7185	0.974949	0.589294	0.957049	0.676558	0.539715	0.568783	0.777101	0.64908		0.497861	0.476966	0.968159	0.566108	0.236794	0.623479	0.807258	0.787397
	0.7195	1.11148	0.543056	1.41895	0.737266	1.61039	0.718001	0.649317		1.23817	0.230029	0.102574	0.174255	1.0196	0.424997	0.02702		0.7195	0.958423	0.589294	0.957049	0.676558	0.757083	0.568783	0.777101	0.643561		0.497861	0.476966	0.907159	0.522539	0.169394	0.597437	1.00185	0.787397
	0.7205	1.10701	0.543056	1.41895	0.724414	1.64769	0.726617	0.649317		1.23817	0.230029	0.102574	0.174255	1.02068	0.424997	0.02702		0.7205	0.977748	0.608215	0.957049	0.675902	0.757083	0.565988	0.777101	0.660968		0.486118	0.476966	0.907159	0.522539	0.169394	0.597437	1.00185	0.774294
	0.7215	1.10701	0.543056	1.40906	0.724414	1.64769	0.699901	0.649317		1.15673	0.230029	0.102574	0.174255	1.03856	0.424997	0.02702		0.7215	0.966076	0.608215	0.932537	0.678086	0.757083	0.565988	0.777101	0.661		0.486118	0.445097	0.895266	0.548738	0.169394	0.597437	1.00185	0.774294
	0.7225	1.10701	0.476165	1.40906	0.724414	1.62015	0.701708	0.647721		1.15673	0.230029	0.102574	0.174255	0.984908	0.424997	0.02702		0.7225	0.966076	0.596702	0.932537	0.681768	0.629497	0.563904	0.767354	0.658361		0.514438	0.411791	0.878237	0.519545	0.169394	0.585321	0.821365	0.762658
	0.7235	1.10701	0.476165	1.40906	0.724414	1.65332	0.701708	0.647721		0.93244	0.244557	0.102574	0.174255	0.984908	0.424997	0.02702		0.7235	0.966076	0.612595	0.925518	0.672437	0.629497	0.55641	0.768475	0.616646		0.509166	0.412265	0.844063	0.502426	0.169394	0.585321	0.840203	0.780251
	0.7245	1.16015	0.476165	1.40906	0.724414	1.69918	0.701708	0.647721		0.93244	0.244557	0.102574	0.174255	0.984908	0.424997	0.02702		0.7245	0.949895	0.631939	0.910623	0.677803	0.629497	0.55641	0.768475	0.616646		0.508448	0.412265	0.865032	0.516612	0.169394	0.585321	0.90752	0.786916
	0.7255	1.16015	0.476165	1.40906	0.721093	1.71473	0.705165	0.647721		0.93244	0.257729	0.102574	0.174255	0.987843	0.406365	0.02702		0.7255	0.949895	0.631939	0.941855	0.667283	0.629497	0.55641	0.755783	0.616533		0.508448	0.457853	0.865032	0.546232	0.169394	0.581323	0.90752	0.786916
	0.7265	1.16015	0.476165	1.40906	0.721093	1.64504	0.705165	0.647721		0.955809	0.257729	0.102574	0.174255	0.987843	0.446707	0.02702		0.7265	0.949895	0.631939	0.916955	0.667283	0.629497	0.577423	0.697786	0.609948		0.508448	0.45175	0.865032	0.546232	0.169394	0.581323	0.90752	0.763704
	0.7275	1.16015	0.476165	1.43883	0.7581	1.59272	0.705165	0.647721		0.955809	0.257729	0.102574	0.174255	0.95557	0.411765	0.02702		0.7275	0.949895	0.631939	0.913589	0.669803	0.629497	0.577423	0.697786	0.618341		0.508448	0.45175	0.865032	0.495625	0.169394	0.581323	0.893943	0.780354
	0.7285	1.16015	0.532476	1.43883	0.7581	1.61121	0.717661	0.647721		0.955809	0.257729	0.102574	0.174255	0.962678	0.411765	0.02702		0.7285	0.949895	0.631939	0.913589	0.651627	0.629497	0.577423	0.697786	0.615502		0.508448	0.45185	0.865032	0.495625	0.169394	0.6934	0.893943	0.780354
	0.7295	1.16015	0.532476	1.42913	0.758795	1.61169	0.715891	0.647721		0.955809	0.257729	0.102574	0.174255	0.962678	0.411765	0.02702		0.7295	0.949895	0.629914	0.913589	0.651627	0.629497	0.577423	0.705344	0.615502		0.508448	0.45185	0.923024	0.489481	0.169394	0.716605	0.854134	0.788621
	0.7305	1.23801	0.532476	1.42913	0.768072	1.58089	0.715891	0.647721		0.955809	0.257729	0.102574	0.174255	0.937504	0.411765	0.02702		0.7305	0.896739	0.629914	0.900437	0.651627	0.629497	0.58847	0.705344	0.571146		0.479158	0.45185	0.923024	0.489481	0.169394	0.716605	0.879177	0.769244
	0.7315	1.23801	0.532476	1.42913	0.768072	1.5627	0.736183	0.628423		0.955809	0.257729	0.102574	0.174255	0.949334	0.411569	0.02702		0.7315	0.896739	0.621273	0.900437	0.682092	0.629497	0.623235	0.71426	0.576843		0.479158	0.45185	1.00171	0.551055	0.169394	0.70271	0.837135	0.790995
	0.7325	1.22216	0.532476	1.39362	0.768072	1.58359	0.718762	0.628423		0.885774	0.249819	0.102574	0.174255	0.949334	0.411569	0.02702		0.7325	0.896739	0.627597	0.900437	0.690659	0.629497	0.623235	0.708928	0.58354		0.479158	0.45185	0.985059	0.551055	0.169394	0.666021	0.781272	0.802933
	0.7335	1.22216	0.532476	1.39362	0.768072	1.58292	0.718762	0.628423		0.885774	0.249819	0.102574	0.174255	0.988332	0.426186	0.02702		0.7335	0.896739	0.627597	0.894888	0.706714	0.629497	0.623235	0.708928	0.577638		0.479158	0.396826	0.985059	0.547834	0.163165	0.666021	0.781272	0.802933
	0.7345	1.18799	0.532476	1.39362	0.768072	1.58292	0.719847	0.636561		1.07014	0.249819	0.102574	0.174255	0.988332	0.467034	0.02702		0.7345	0.896739	0.627597	0.894888	0.748795	0.415426	0.623235	0.768224	0.593325		0.479158	0.396826	0.995279	0.595196	0.163165	0.65715	0.781272	0.803922
	0.7355	1.18799	0.532476	1.39362	0.768072	1.53153	0.719847	0.636561		1.22122	0.249819	0.102574	0.174255	0.997598	0.470582	0.02702		0.7355	0.896739	0.637589	0.894888	0.748795	0.546703	0.624664	0.768224	0.597695		0.479158	0.396826	1.03273	0.595494	0.163165	0.637059	0.839101	0.829041
	0.7365	1.20339	0.532476	1.39362	0.768072	1.59364	0.723294	0.636561		1.22122	0.249819	0.134173	0.174255	1.02356	0.470582	0.02702		0.7365	0.896739	0.626519	0.852385	0.748795	0.546703	0.624664	0.792524	0.594176		0.479158	0.398353	1.01466	0.548534	0.163165	0.637059	0.839101	0.829041
	0.7375	1.20339	0.532476	1.39362	0.768072	1.86422	0.723294	0.636561		1.22122	0.249819	0.134173	0.174255	1.02356	0.470582	0.02702		0.7375	0.896739	0.635047	0.852385	0.760011	0.546703	0.624664	0.792524	0.603215		0.479158	0.398353	1.01466	0.548534	0.163165	0.640781	0.769576	0.827536
	0.7385	1.20339	0.532476	1.39362	0.768072	1.87717	0.723294	0.636561		1.22122	0.250413	0.134173	0.174255	1.02356	0.470582	0.02702		0.7385	0.896739	0.663963	0.847482	0.760011	0.610804	0.626799	0.792524	0.599822		0.469763	0.398353	1.01466	0.514875	0.163165	0.652936	0.769576	0.836666
	0.7395	1.20339	0.532476	1.39362	0.768072	1.99251	0.723294	0.636561		1.22122	0.250413	0.134173	0.174255	1.02356	0.470582	0.02702		0.7395	0.893111	0.663963	0.83491	0.759541	0.587127	0.626799	0.800786	0.605123		0.431553	0.412283	1.02546	0.453557	0.163165	0.652936	0.769576	0.838626
	0.7405	1.20339	0.409782	1.47535	0.768072	1.86249	0.723294	0.636561		1.22122	0.250413	0.134173	0.174255	1.10083	0.470582	0.02702		0.7405	0.893111	0.65789	0.84075	0.754963	0.587127	0.621746	0.800786	0.603514		0.443316	0.412283	0.923285	0.462372	0.163165	0.647391	0.778368	0.824507
	0.7415	1.20339	0.409782	1.47535	0.768072	1.86949	0.758399	0.636561		1.22122	0.250413	0.134173	0.174255	1.10083	0.499449	0.02702		0.7415	0.893111	0.6582	0.855366	0.744749	0.587127	0.61881	0.800786	0.603514		0.443316	0.423341	0.923285	0.462372	0.163165	0.652425	0.781804	0.794474
	0.7425	1.20339	0.409782	1.47535	0.768072	1.86949	0.769884	0.636561		1.22122	0.280929	0.134173	0.174255	1.09616	0.499449	0.02702		0.7425	0.907248	0.6582	0.855366	0.744749	0.587127	0.636803	0.800786	0.596186		0.443316	0.416249	0.923285	0.460676	0.163165	0.652425	0.754459	0.763958
	0.7435	1.217	0.409782	1.47535	0.794832	1.75386	0.769884	0.636561		1.07819	0.280929	0.134173	0.174255	1.08898	0.499449	0.02702		0.7435	0.930476	0.6582	0.855366	0.744749	0.587127	0.636803	0.87522	0.550107		0.428721	0.416249	0.940557	0.460676	0.163165	0.633751	0.765858	0.814137
	0.7445	1.217	0.409782	1.25276	0.794832	1.76852	0.776848	0.636561		1.18965	0.280929	0.134173	0.174255	1.09745	0.473436	0.02702		0.7445	0.930476	0.659745	0.855366	0.744904	0.587127	0.632458	0.87522	0.549046		0.427768	0.416249	0.946331	0.4874	0.163165	0.609081	0.765858	0.814137
	0.7455	1.22667	0.409782	1.25276	0.794832	1.67888	0.762951	0.636561		1.18965	0.280929	0.134173	0.174255	1.09745	0.476111	0.02702		0.7455	0.935293	0.659745	0.855366	0.728616	0.587127	0.632458	0.855101	0.521913		0.431398	0.46905	0.919259	0.523756	0.163165	0.609081	0.765858	0.812865
	0.7465	1.22667	0.409782	1.25276	0.787958	1.73603	0.762951	0.636561		1.18965	0.332835	0.134173	0.174255	1.11336	0.455256	0.02702		0.7465	0.935293	0.659745	0.888086	0.687036	0.587127	0.632458	0.855101	0.53295		0.431398	0.46905	0.919259	0.567028	0.163165	0.609081	0.736608	0.812865
	0.7475	1.22667	0.409782	1.25276	0.787958	1.68968	0.763689	0.644837		1.16904	0.356684	0.134173	0.174255	1.0496	0.455256	0.02702		0.7475	0.935293	0.668064	0.888086	0.689291	0.587127	0.632458	0.855101	0.53295		0.431398	0.46905	0.919259	0.567028	0.163165	0.609081	0.642157	0.812865
	0.7485	1.28429	0.409782	1.25276	0.773045	1.68968	0.763689	0.645112		1.08774	0.356684	0.134173	0.174255	1.0496	0.455256	0.02702		0.7485	0.927756	0.662895	0.878297	0.680268	0.587127	0.643186	0.869395	0.537436		0.431398	0.46905	0.954595	0.476116	0.163165	0.609081	0.642157	0.834393
	0.7495	1.29485	0.409782	1.25276	0.773045	1.63157	0.7684	0.645112		1.08774	0.356684	0.134173	0.189009	1.0496	0.455256	0.02702		0.7495	0.90757	0.659186	0.878297	0.680268	0.587127	0.643186	0.87708	0.530435		0.431398	0.46905	0.981485	0.47803	0.163165	0.586619	0.642157	0.82147
	0.7505	1.29485	0.409782	1.21986	0.773045	1.63157	0.76639	0.655379		1.08774	0.356684	0.134173	0.189009	1.02008	0.455256	0.02702		0.7505	0.90757	0.672441	0.916962	0.679095	0.667041	0.643186	0.889062	0.526181		0.466861	0.467154	1.00344	0.47803	0.163165	0.586619	0.642157	0.82147
	0.7515	1.26631	0.409782	1.21986	0.773045	1.63157	0.76639	0.655379		1.08774	0.356684	0.134173	0.189009	1.01947	0.455256	0.02702		0.7515	0.88836	0.681621	0.916962	0.650543	0.667041	0.604825	0.889062	0.531997		0.466861	0.467154	1.02971	0.47803	0.163165	0.586619	0.660425	0.86199
	0.7525	1.23235	0.409782	1.21986	0.773045	1.66231	0.76639	0.655379		1.05996	0.356684	0.134173	0.189009	1.01947	0.434828	0.02702		0.7525	0.88836	0.681621	0.916962	0.636423	0.679176	0.585492	0.889062	0.52822		0.466861	0.467154	1.02971	0.531809	0.163165	0.578046	0.660425	0.773213
	0.7535	1.30202	0.409782	1.21986	0.827364	1.64973	0.772099	0.655379		1.05996	0.356684	0.134173	0.189009	1.01947	0.434828	0.02702		0.7535	0.88836	0.688608	0.916962	0.640252	0.535829	0.608547	0.889062	0.533606		0.466861	0.451086	1.02971	0.523713	0.163165	0.499395	0.651377	0.725723
	0.7545	1.24403	0.409782	1.21986	0.827364	1.67094	0.763258	0.692409		0.892361	0.356684	0.134173	0.189009	1.01623	0.434828	0.02702		0.7545	0.88836	0.725906	0.898136	0.640252	0.535829	0.617791	0.843828	0.533606		0.466861	0.461368	1.02971	0.523713	0.163165	0.499395	0.651377	0.725723
	0.7555	1.29771	0.409782	1.21986	0.827364	1.6572	0.763258	0.692409		1.0029	0.356684	0.134173	0.186175	1.03485	0.434828	0.02702		0.7555	0.88836	0.727136	0.89863	0.640252	0.535829	0.615597	0.843828	0.533606		0.466861	0.461368	0.990964	0.514366	0.163165	0.499395	0.667455	0.725723
	0.7565	1.31779	0.409782	1.22567	0.827364	1.65349	0.751956	0.692409		1.05714	0.356684	0.134173	0.186175	1.00414	0.405144	0.02702		0.7565	0.925457	0.690061	0.938332	0.640252	0.535829	0.615597	0.865741	0.526535		0.466861	0.461368	0.947767	0.514366	0.163165	0.499395	0.667455	0.679453
	0.7575	1.31779	0.409782	1.22567	0.827364	1.63206	0.74139	0.692409		1.05714	0.439479	0.134173	0.193104	1.00414	0.534427	0.02702		0.7575	0.923011	0.690061	0.886117	0.662665	0.535829	0.616812	0.771212	0.526535		0.391697	0.477446	0.94427	0.500658	0.165367	0.499395	0.667455	0.679453
	0.7585	1.31779	0.409782	1.22567	0.827364	1.63509	0.75257	0.692409		1.05714	0.439479	0.134173	0.193104	1.00414	0.589701	0.02702		0.7585	0.923011	0.694719	0.894826	0.662665	0.535829	0.616812	0.771212	0.518328		0.393356	0.477446	0.894203	0.549642	0.165367	0.489654	0.667455	0.730408
	0.7595	1.31779	0.409782	1.22567	0.827364	1.63509	0.75257	0.692409		1.05714	0.439479	0.134173	0.193104	0.961728	0.588808	0.02702		0.7595	0.943824	0.736973	0.893161	0.690796	0.535829	0.625907	0.771212	0.523098		0.393356	0.46335	0.846103	0.549642	0.165367	0.50657	0.710995	0.755437
	0.7605	1.31779	0.401619	1.22567	0.827364	1.81027	0.7908	0.692409		1.05714	0.439479	0.134173	0.193104	0.961728	0.544577	0.02702		0.7605	0.943824	0.736973	0.893161	0.696804	0.423844	0.625907	0.771212	0.525709		0.393356	0.47738	0.846103	0.522411	0.165367	0.50657	0.748401	0.759812
	0.7615	1.31779	0.401619	1.22567	0.842024	1.81027	0.79586	0.692409		1.05714	0.439479	0.134173	0.193104	0.961728	0.380814	0.02702		0.7615	0.943824	0.736973	0.874903	0.685294	0.428125	0.625907	0.771212	0.534083		0.393356	0.47738	0.846103	0.491519	0.165367	0.54204	0.748401	0.764375
	0.7625	1.31779	0.376699	1.22567	0.842024	1.80109	0.79586	0.692409		1.05714	0.439479	0.134173	0.193104	0.963524	0.380814	0.02702		0.7625	0.912051	0.729749	0.874903	0.685294	0.428125	0.625907	0.779391	0.534498		0.393356	0.510606	0.846103	0.491519	0.165367	0.527732	0.756872	0.760563
	0.7635	1.31779	0.343414	1.38471	0.842024	1.81008	0.793694	0.692409		1.05714	0.437748	0.134173	0.193104	0.963524	0.380814	0.02702		0.7635	0.912051	0.709289	0.874903	0.685294	0.462203	0.632007	0.779391	0.550676		0.393356	0.510606	0.813052	0.44102	0.165367	0.523815	0.834252	0.760563
	0.7645	1.31779	0.343414	1.38471	0.842024	1.76458	0.793694	0.692409		1.05714	0.437748	0.134173	0.194464	0.945583	0.351117	0.02702		0.7645	0.942367	0.666515	0.879935	0.685294	0.462203	0.621801	0.783995	0.550676		0.393356	0.541907	0.813052	0.44102	0.165367	0.521773	0.814249	0.760563
	0.7655	1.31779	0.343414	1.40326	0.842024	1.76458	0.793694	0.701195		1.17145	0.437748	0.134173	0.194464	0.945583	0.351117	0.02702		0.7655	0.942367	0.6721	0.879935	0.684509	0.462203	0.621801	0.783995	0.550279		0.393356	0.579197	0.840611	0.434823	0.24979	0.521773	0.814249	0.809179
	0.7665	1.31779	0.343414	1.40326	0.840408	1.62162	0.791277	0.701195		1.17145	0.507822	0.134173	0.194464	0.945583	0.351117	0.02702		0.7665	0.935649	0.629413	0.894308	0.684509	0.462203	0.623338	0.80351	0.566598		0.393356	0.579197	0.840611	0.549397	0.24979	0.552861	0.814249	0.809179
	0.7675	1.31779	0.262693	1.40326	0.840313	1.60338	0.774926	0.701195		1.17145	0.507822	0.134173	0.194464	0.958924	0.351117	0.02702		0.7675	0.935649	0.577933	0.87156	0.657259	0.462203	0.623338	0.80351	0.566598		0.393356	0.547363	0.840611	0.597659	0.24979	0.532784	0.814249	0.897321
	0.7685	1.3196	0.262693	1.40715	0.811019	1.57964	0.774926	0.695699		1.17145	0.420027	0.134173	0.194464	0.964812	0.351117	0.02702		0.7685	0.943693	0.574956	0.889846	0.657259	0.452606	0.638646	0.80351	0.573949		0.368395	0.547363	0.81715	0.569316	0.24979	0.532784	0.892859	0.910137
	0.7695	1.3196	0.262693	1.40715	0.819641	1.57331	0.774926	0.695699		1.17145	0.447843	0.134173	0.194464	0.962313	0.351117	0.02702		0.7695	0.943693	0.588839	0.910214	0.657259	0.454286	0.645723	0.80351	0.574719		0.440741	0.547363	0.81715	0.569316	0.24979	0.532784	0.942313	0.910137
	0.7705	1.3196	0.262693	1.40715	0.819641	1.43291	0.772577	0.695699		1.17145	0.447843	0.134173	0.194464	0.94228	0.351117	0.02702		0.7705	0.976274	0.584913	0.942089	0.657259	0.454286	0.645723	0.80351	0.566421		0.440741	0.547363	0.818446	0.572283	0.24979	0.532784	0.92939	0.910137
	0.7715	1.20311	0.262693	1.40715	0.819641	1.43291	0.745628	0.695699		1.33981	0.447843	0.134173	0.194464	0.94228	0.351117	0.02702		0.7715	0.976274	0.584913	0.938754	0.66829	0.454286	0.645723	0.762279	0.566421		0.440741	0.551445	0.818446	0.572283	0.24979	0.532784	0.87648	0.790829
	0.7725	1.17272	0.262693	1.40715	0.819641	1.46593	0.748063	0.695699		1.61604	0.49817	0.134173	0.194464	0.933823	0.288837	0.02702		0.7725	0.976274	0.584913	0.9366	0.651129	0.454286	0.645723	0.799322	0.559321		0.440741	0.545935	0.81459	0.6125	0.24979	0.543336	1.16614	0.754549
	0.7735	1.25774	0.262693	1.40715	0.823171	1.45314	0.748063	0.695699		1.61604	0.49817	0.134173	0.194464	0.933823	0.361074	0.02702		0.7735	0.99811	0.584913	0.9366	0.645056	0.454286	0.642951	0.814434	0.560085		0.491464	0.572125	0.916084	0.561356	0.24979	0.544136	1.16614	0.729669
	0.7745	1.25774	0.262693	1.43443	0.823171	1.45314	0.722481	0.70113		1.61604	0.49817	0.134173	0.194464	0.906907	0.361074	0.02702		0.7745	0.99811	0.583897	0.9366	0.646704	0.454286	0.642951	0.82814	0.585686		0.491464	0.592762	0.916084	0.534507	0.29886	0.544136	0.801206	0.743246
	0.7755	1.25774	0.330759	1.43443	0.823171	1.45314	0.721313	0.70113		1.63878	0.49817	0.134173	0.194464	0.906907	0.361074	0.02702		0.7755	0.99811	0.555057	0.941655	0.664247	0.454286	0.642951	0.814244	0.592733		0.491464	0.565923	0.964184	0.534507	0.29886	0.544136	0.818986	0.743246
	0.7765	1.221	0.330759	1.43443	0.823171	1.46115	0.721313	0.70113		1.87827	0.49817	0.134173	0.194464	0.922038	0.435928	0.02702		0.7765	0.99811	0.561989	0.941655	0.664247	0.454286	0.642951	0.798845	0.592733		0.491464	0.565923	0.964184	0.579018	0.29886	0.52898	0.818986	0.736443
	0.7775	1.33909	0.330759	1.40313	0.823171	1.46644	0.691265	0.70113		1.91038	0.49817	0.134173	0.194464	0.915474	0.435928	0.02702		0.7775	0.973354	0.553227	0.93347	0.664247	0.454286	0.642951	0.798845	0.592733		0.517522	0.565923	0.964184	0.579018	0.29886	0.544188	0.818986	0.786234
	0.7785	1.33909	0.330759	1.40313	0.823171	1.49118	0.691265	0.70113		1.89637	0.52628	0.134173	0.194464	0.933785	0.435928	0.02702		0.7785	1.00704	0.553227	0.950312	0.664247	0.454286	0.642951	0.852101	0.592733		0.517522	0.568897	0.964184	0.590711	0.29886	0.533605	0.818986	0.786234
	0.7795	1.33909	0.330759	1.40313	0.824203	1.57443	0.691265	0.731572		1.85891	0.442592	0.134173	0.194464	0.933785	0.435928	0.02702		0.7795	1.00704	0.577588	0.929764	0.706393	0.354073	0.642951	0.852101	0.602715		0.517522	0.568897	0.885597	0.573925	0.29886	0.533605	0.976882	0.786234
	0.7805	1.33909	0.330759	1.40313	0.824203	1.58442	0.691265	0.705372		1.85891	0.442592	0.134173	0.194464	0.974014	0.435928	0.02702		0.7805	1.00704	0.583868	0.916882	0.706393	0.354073	0.642951	0.790977	0.593085		0.517522	0.520425	0.895306	0.573925	0.219752	0.51103	0.976882	0.800766
	0.7815	1.29761	0.330759	1.40313	0.824203	1.58442	0.691265	0.705372		1.85891	0.442592	0.134173	0.194464	0.974014	0.435928	0.02702		0.7815	1.00704	0.583868	0.91239	0.706393	0.354073	0.638049	0.790977	0.593085		0.536874	0.520425	0.895306	0.514035	0.219752	0.51103	0.923854	0.800766
	0.7825	1.29158	0.330759	1.40313	0.824203	1.6029	0.678598	0.705372		1.64818	0.442592	0.251672	0.178978	0.962377	0.435928	0.02702		0.7825	1.00704	0.583868	0.953741	0.706393	0.354073	0.638049	0.808915	0.599502		0.525766	0.536072	0.895306	0.514035	0.219752	0.522245	0.933715	0.802517
	0.7835	1.29158	0.34584	1.40313	0.81899	1.74614	0.720219	0.705372		1.06231	0.422035	0.251672	0.178978	0.971161	0.44056	0.02702		0.7835	1.00704	0.583868	0.953741	0.711501	0.354073	0.650579	0.808915	0.596555		0.525766	0.536072	0.895306	0.514035	0.219752	0.522245	0.933715	0.802517
	0.7845	1.29158	0.34584	1.45871	0.81899	1.77794	0.720219	0.705372		1.06231	0.460642	0.251672	0.178978	0.971161	0.44056	0.02702		0.7845	1.00704	0.583868	0.953741	0.727945	0.354073	0.617985	0.808915	0.634895		0.525766	0.536072	0.882783	0.555896	0.219752	0.548758	0.933715	0.749984
	0.7855	1.32577	0.34584	1.45871	0.81899	1.69662	0.720219	0.746921		1.06231	0.460642	0.251672	0.178978	0.971161	0.44056	0.02702		0.7855	1.00704	0.583868	0.915524	0.740815	0.354073	0.612232	0.808915	0.644906		0.578661	0.540656	0.921811	0.555896	0.219752	0.548758	1.00959	0.730864
	0.7865	1.32577	0.34584	1.45871	0.81899	1.60575	0.724631	0.746921		0.775016	0.460642	0.251672	0.178978	0.971161	0.435368	0.02702		0.7865	1.00704	0.61158	0.889064	0.740815	0.354073	0.612232	0.81169	0.649054		0.676744	0.547549	0.96176	0.598241	0.219752	0.568689	1.00392	0.730864
	0.7875	1.32577	0.34584	1.43281	0.81899	1.5966	0.724631	0.746921		0.775016	0.460642	0.251672	0.178978	0.971161	0.435368	0.02702		0.7875	1.00704	0.61158	0.889064	0.720952	0.354073	0.612232	0.817843	0.60528		0.676744	0.551825	1.01955	0.646965	0.207837	0.568689	1.02889	0.73895
	0.7885	1.29625	0.34584	1.43281	0.767559	1.5966	0.727644	0.771272		0.775016	0.460642	0.251672	0.178978	0.971161	0.435368	0.02702		0.7885	1.03834	0.606914	0.889064	0.720952	0.354073	0.612232	0.817843	0.633737		0.676744	0.583473	1.04638	0.640192	0.207837	0.568689	0.942224	0.761798
	0.7895	1.29625	0.34584	1.43281	0.767559	1.62429	0.727644	0.771272		0.775016	0.460642	0.251672	0.178978	0.936185	0.41259	0.02702		0.7895	1.03834	0.606914	0.848532	0.70987	0.354073	0.612232	0.817843	0.640086		0.697741	0.624332	1.04638	0.619538	0.207837	0.568689	0.939122	0.761065
	0.7905	1.29625	0.34584	1.33222	0.767559	1.5372	0.705757	0.771272		0.775016	0.460642	0.251672	0.178978	0.956452	0.441728	0.02702		0.7905	1.05908	0.639224	0.848532	0.716264	0.356528	0.62017	0.817843	0.623764		0.61936	0.624332	1.04638	0.623978	0.207837	0.568689	0.939122	0.761065
	0.7915	1.20445	0.34584	1.40479	0.767559	1.54046	0.700302	0.774202		0.693429	0.460642	0.251672	0.178978	1.00711	0.441728	0.02702		0.7915	1.05908	0.630803	0.81217	0.745281	0.565048	0.631492	0.864006	0.630296		0.61936	0.614034	1.04638	0.600067	0.207837	0.489655	0.854463	0.761065
	0.7925	1.20445	0.34584	1.40479	0.767559	1.54046	0.704999	0.774202		0.693429	0.460642	0.251672	0.178978	1.01318	0.441728	0.02702		0.7925	1.05908	0.628553	0.801521	0.760362	0.565048	0.631492	0.866895	0.623507		0.61936	0.614034	1.04193	0.584751	0.207837	0.474275	0.982114	0.761065
	0.7935	1.20394	0.434588	1.40479	0.767559	1.53272	0.712772	0.782953		0.693429	0.343281	0.251672	0.178978	1.01318	0.441728	0.02702		0.7935	1.05908	0.628553	0.799155	0.760362	0.565048	0.631492	0.877142	0.626957		0.61936	0.627486	1.02226	0.584751	0.166375	0.475935	0.994872	0.786791
	0.7945	1.28933	0.434588	1.40479	0.767559	1.51739	0.712772	0.782953		0.693429	0.342684	0.251672	0.178978	1.03289	0.441728	0.02702		0.7945	1.0424	0.626946	0.799155	0.760362	0.565048	0.631492	0.868326	0.547994		0.540744	0.627486	0.982555	0.623136	0.166375	0.503834	0.93834	0.791406
	0.7955	1.28933	0.434588	1.40479	0.767559	1.58611	0.712772	0.794605		0.693429	0.342684	0.251672	0.178978	1.03289	0.441728	0.02702		0.7955	1.0424	0.630954	0.799155	0.760362	0.580185	0.621125	0.873681	0.548851		0.540744	0.591044	0.890971	0.623136	0.166375	0.52906	0.875004	0.791406
	0.7965	1.33842	0.434588	1.40479	0.767559	1.58963	0.746286	0.794605		0.693429	0.342684	0.251672	0.178978	0.994477	0.441728	0.02702		0.7965	1.0424	0.628045	0.851888	0.760362	0.590131	0.621125	0.873681	0.545268		0.540744	0.591044	0.886122	0.577655	0.166375	0.52906	0.875004	0.791406
	0.7975	1.33842	0.434588	1.40479	0.767559	1.55313	0.73935	0.794605		0.686604	0.365555	0.251672	0.178978	0.994477	0.441728	0.02702		0.7975	1.07573	0.646704	0.87262	0.787508	0.590131	0.621125	0.873681	0.545268		0.540744	0.57736	0.886122	0.576557	0.166375	0.556585	0.875004	0.795243
	0.7985	1.35095	0.434588	1.40479	0.767559	1.57308	0.73935	0.794605		0.686604	0.365555	0.251672	0.178978	1.01958	0.441728	0.02702		0.7985	1.07573	0.646704	0.944174	0.805506	0.4516	0.617471	0.873681	0.545268		0.498916	0.514024	0.919241	0.5659	0.166375	0.56308	0.753564	0.82047
	0.7995	1.35095	0.434588	1.40479	0.739318	1.63173	0.73935	0.824023		0.686604	0.367631	0.251672	0.178978	1.01958	0.468285	0.02702		0.7995	1.07573	0.623379	0.93134	0.811916	0.4516	0.617471	0.963545	0.545268		0.488516	0.514024	0.910422	0.5659	0.166375	0.56308	0.753564	0.801984
	0.8005	1.35095	0.434588	1.40479	0.739318	1.56066	0.734028	0.824023		0.686604	0.367631	0.108499	0.178978	1.14756	0.441507	0.02702		0.8005	1.04567	0.623379	0.93134	0.811916	0.4516	0.617471	0.963545	0.536462		0.488516	0.514024	0.852709	0.568961	0.166375	0.516121	0.753564	0.838434
	0.8015	1.35095	0.434588	1.40479	0.739318	1.58669	0.725216	0.824023		0.686604	0.367631	0.108499	0.178978	1.17946	0.481876	0.02702		0.8015	1.04567	0.650067	0.93134	0.811916	0.4516	0.617471	0.967403	0.535907		0.488516	0.518849	0.852709	0.568961	0.166375	0.516121	0.723573	0.838434
	0.8025	1.35095	0.453638	1.26554	0.739318	1.57955	0.755887	0.824023		0.686604	0.37028	0.108499	0.178978	1.17946	0.473483	0.02702		0.8025	1.0506	0.650067	0.906398	0.811916	0.4516	0.617471	1.06765	0.536589		0.438235	0.518849	0.878834	0.585595	0.166375	0.516121	0.714579	0.845119
	0.8035	1.35095	0.453638	1.26554	0.739318	1.50328	0.755887	0.824023		0.686604	0.37028	0.108499	0.178978	1.16697	0.473483	0.02702		0.8035	1.0506	0.696496	0.853714	0.795416	0.432725	0.598169	1.06765	0.536589		0.438235	0.512566	0.878834	0.608661	0.389316	0.550952	0.709488	0.845119
	0.8045	1.35095	0.543681	1.23888	0.739318	1.50328	0.769315	0.824023		0.686604	0.400341	0.108499	0.178978	1.16169	0.473483	0.02702		0.8045	1.06619	0.704074	0.853714	0.812184	0.432725	0.596567	1.01426	0.540818		0.475625	0.512566	0.878834	0.583688	0.389316	0.550952	0.709488	0.838736
	0.8055	1.35095	0.543681	1.23888	0.773468	1.50328	0.769315	0.824023		0.686604	0.400341	0.108499	0.178978	0.977398	0.473483	0.02702		0.8055	1.06619	0.704074	0.87513	0.747306	0.432725	0.596567	1.05774	0.540536		0.475625	0.512566	0.876958	0.583688	0.389316	0.505657	0.709488	0.825224
	0.8065	1.25624	0.543681	1.23888	0.753979	1.52515	0.770885	0.824023		0.686604	0.400341	0.108499	0.178978	0.977398	0.515858	0.02702		0.8065	1.05497	0.687047	0.987338	0.793996	0.432725	0.596567	1.09663	0.541247		0.475625	0.512566	0.876958	0.572841	0.389316	0.507033	0.926221	0.858789
	0.8075	1.40555	0.560289	1.23888	0.753979	1.52515	0.769671	0.824023		0.686604	0.400341	0.108499	0.178978	0.977398	0.515858	0.02702		0.8075	1.05497	0.637339	0.923714	0.850615	0.432725	0.6016	1.01425	0.536267		0.475625	0.512566	0.892762	0.572841	0.389316	0.507033	0.926221	0.858789
	0.8085	1.41287	0.560289	1.23888	0.753979	1.51541	0.762812	0.824023		0.686604	0.400341	0.108499	0.178978	0.972262	0.506026	0.02702		0.8085	1.05497	0.642664	0.905523	0.8547	0.432725	0.612283	0.896077	0.537003		0.475625	0.529446	0.892762	0.630384	0.389316	0.474026	0.926221	0.851611
	0.8095	1.41287	0.560289	1.23888	0.753979	1.51797	0.746471	0.824023		0.626115	0.400341	0.108499	0.178978	0.972262	0.588234	0.02702		0.8095	1.05497	0.626715	0.905523	0.826208	0.432725	0.614906	0.886487	0.533956		0.475625	0.612938	0.888009	0.606857	0.389316	0.474026	0.926221	0.821969
	0.8105	1.41287	0.565319	1.23888	0.753979	1.519	0.7042	0.801453		0.626115	0.400341	0.108499	0.178978	0.965719	0.549021	0.02702		0.8105	1.03308	0.626715	0.905523	0.843565	0.432725	0.614906	0.92878	0.540178		0.555983	0.618506	1.15003	0.606857	0.389316	0.490814	0.963618	0.811735
	0.8115	1.41287	0.565319	1.23888	0.753979	1.55362	0.697155	0.801453		0.640344	0.4185	0.108499	0.178978	0.978483	0.549021	0.02702		0.8115	1.03308	0.626715	0.923203	0.843565	0.432725	0.614906	0.92878	0.540178		0.587564	0.618506	1.1954	0.576355	0.389316	0.50938	1.04322	0.811735
	0.8125	1.41287	0.572228	1.23888	0.753979	1.51242	0.712756	0.792608		0.640344	0.4185	0.108499	0.178978	0.978483	0.560865	0.02702		0.8125	1.03308	0.665092	0.966136	0.834348	0.432725	0.614906	0.896357	0.541783		0.587564	0.624341	1.25161	0.590636	0.389316	0.50938	0.900819	0.811735
	0.8135	1.41287	0.572228	1.23888	0.753979	1.49864	0.712756	0.792608		0.640344	0.4185	0.108499	0.178978	0.978483	0.595866	0.02702		0.8135	1.03308	0.693855	0.966136	0.842574	0.432725	0.619596	0.88619	0.541783		0.587564	0.62376	0.926876	0.60562	0.749861	0.50938	0.900819	0.813895
	0.8145	1.41287	0.572228	1.23888	0.753979	1.49864	0.742227	0.792608		0.640344	0.4185	0.108499	0.178978	1.0489	0.595866	0.02702		0.8145	1.03308	0.702286	0.993763	0.842574	0.432725	0.614676	0.820619	0.537197		0.587564	0.62376	0.942257	0.60562	0.749861	0.50938	0.900819	0.748056
	0.8155	1.45083	0.572228	1.21265	0.753979	1.46152	0.742227	0.792608		0.72376	0.374349	0.108499	0.178978	1.0489	0.545368	0.02702		0.8155	1.03653	0.702286	0.966857	0.777335	0.518949	0.614676	0.820619	0.535878		0.553764	0.619845	0.942257	0.614049	1.14556	0.50938	0.858604	0.730494
	0.8165	1.45083	0.572228	1.21265	0.753979	1.60973	0.742227	0.792608		0.995838	0.406901	0.108499	0.178978	1.03108	0.545368	0.02702		0.8165	1.03653	0.676641	0.956491	0.777335	0.518949	0.610196	0.821782	0.541624		0.553764	0.57073	0.942257	0.625389	1.14556	0.523675	0.858604	0.774052
	0.8175	1.45083	0.637887	1.21265	0.753979	1.60519	0.753531	0.795931		1.03197	0.406901	0.108499	0.169249	1.04042	0.491082	0.02702		0.8175	1.03683	0.676641	0.961425	0.777335	0.518949	0.611891	0.779987	0.539996		0.553764	0.549833	0.942257	0.592191	1.14556	0.523675	0.730541	0.774052
	0.8185	1.40634	0.637887	1.21265	0.753979	1.62868	0.753531	0.795931		1.03197	0.406901	0.108499	0.169249	1.04067	0.454748	0.02702		0.8185	1.03683	0.676336	0.981289	0.783709	0.518949	0.611891	0.798995	0.542206		0.582034	0.549833	0.981362	0.598975	0.683424	0.49586	0.857111	0.774052
	0.8195	1.41299	0.637887	1.31284	0.753979	1.62868	0.766559	0.763175		1.03197	0.406901	0.108499	0.169249	1.04067	0.454748	0.02702		0.8195	1.03683	0.676336	1.01236	0.772987	0.511677	0.611891	0.798995	0.548999		0.582034	0.549833	0.955411	0.49033	0.668964	0.476046	0.857111	0.774052
	0.8205	1.41299	0.637887	1.31284	0.753979	1.62088	0.766559	0.763175		1.03197	0.404768	0.108499	0.169249	1.06344	0.454748	0.02702		0.8205	1.03683	0.676336	0.977922	0.784254	0.511677	0.652847	0.798995	0.552331		0.582034	0.539452	0.968889	0.49033	0.668964	0.486247	0.839157	0.727054
	0.8215	1.32357	0.637887	1.31284	0.753979	1.62088	0.766559	0.763175		1.03197	0.404768	0.108499	0.169249	1.02313	0.454748	0.02702		0.8215	1.05031	0.642246	0.977922	0.784254	0.511677	0.664492	0.757031	0.548719		0.582034	0.582324	1.23224	0.49033	0.668964	0.486247	0.804963	0.726878
	0.8225	1.2969	0.637887	1.24313	0.753979	1.68646	0.772328	0.763175		1.22527	0.41996	0.108499	0.169249	1.03714	0.445703	0.02702		0.8225	1.05031	0.642246	0.977922	0.784254	0.591921	0.666097	0.728473	0.561145		0.582034	0.582324	1.15783	0.641874	0.668964	0.486247	0.804963	0.752491
	0.8235	1.32476	0.637887	1.24313	0.716487	1.68646	0.77491	0.763175		1.07895	0.411631	0.108499	0.169249	1.03714	0.445703	0.02702		0.8235	1.05031	0.642246	1.05085	0.784254	0.602327	0.671849	0.743868	0.561838		0.582034	0.565163	0.911663	0.478571	1.51224	0.486247	1.00793	0.752491
	0.8245	1.20983	0.637887	1.24313	0.726005	1.68646	0.779771	0.757948		1.07895	0.411631	0.108499	0.169249	1.0863	0.442512	0.02702		0.8245	1.05031	0.647455	1.05085	0.784254	0.523393	0.671849	0.743868	0.561838		0.582034	0.565163	0.911663	0.478571	1.67778	0.467321	0.984104	0.752491
	0.8255	1.20983	0.637887	1.24313	0.726005	1.56091	0.779771	0.745946		1.07895	0.411631	0.108499	0.169249	1.0863	0.442512	0.02702		0.8255	1.05031	0.63601	1.05085	0.77761	0.523393	0.671849	0.753627	0.561838		0.519497	0.565163	0.880962	0.478571	0.284733	0.467321	1.00911	0.812997
	0.8265	1.22374	0.717205	1.24313	0.726005	1.59139	0.747116	0.745946		1.07895	0.411631	0.108499	0.169249	1.18161	0.466443	0.02702		0.8265	1.07783	0.638434	1.07824	0.77761	0.523393	0.671849	0.753627	0.561838		0.519497	0.562326	0.887134	0.478571	0.284733	0.467321	1.05679	0.812997
	0.8275	1.24921	0.736425	1.22592	0.726005	1.59903	0.747116	0.745946		1.07895	0.421183	0.108499	0.169249	1.18161	0.466443	0.02702		0.8275	1.04778	0.646906	1.06694	0.765352	0.523393	0.671849	0.753627	0.568414		0.487215	0.562326	0.912534	0.478571	0.284733	0.485292	1.05679	0.837516
	0.8285	1.24921	0.740365	1.22592	0.726005	1.79893	0.73615	0.738738		1.12004	0.421183	0.108499	0.169249	1.33437	0.466443	0.02702		0.8285	1.04778	0.646906	1.05114	0.765352	0.523393	0.654241	0.753627	0.565617		0.487215	0.562326	0.995473	0.585539	0.284733	0.470598	1.05679	0.932243
	0.8295	1.24921	0.740365	1.22592	0.743025	1.79893	0.745308	0.737886		1.12004	0.421183	0.108499	0.169249	1.24736	0.466443	0.02702		0.8295	1.04778	0.646906	1.00107	0.759362	0.523393	0.627899	0.79036	0.562819		0.487215	0.524666	0.995473	0.585539	0.284733	0.497848	0.874447	0.903859
	0.8305	1.24921	0.740365	1.22592	0.755808	1.85735	0.731447	0.737886		1.12004	0.421183	0.108499	0.196532	1.24736	0.486233	0.02702		0.8305	1.0549	0.656695	0.983634	0.753573	0.523393	0.629622	0.79036	0.557843		0.487215	0.521288	0.995473	0.605096	0.284733	0.497848	0.871424	0.899781
	0.8315	1.31562	0.740365	1.22592	0.771438	1.85735	0.731447	0.737886		1.12004	0.421183	0.108499	0.196532	1.22057	0.486233	0.02702		0.8315	1.0549	0.656695	0.983634	0.727677	0.555592	0.629622	0.804237	0.557843		0.494272	0.521288	1.15923	0.538272	0.284733	0.482264	0.871424	0.858365
	0.8325	1.31562	0.740365	1.22592	0.7526	1.90464	0.725279	0.737886		1.12004	0.421183	0.108499	0.196532	1.24177	0.475506	0.02702		0.8325	1.0549	0.682838	1.06336	0.755295	0.555592	0.630463	0.804237	0.559003		0.494272	0.521288	1.15923	0.584106	0.284733	0.482264	0.871424	0.907308
	0.8335	1.31562	0.740365	1.22592	0.753991	1.9148	0.731756	0.737886		1.07277	0.421183	0.108499	0.196532	1.35891	0.475506	0.02702		0.8335	1.0549	0.686948	0.99286	0.744253	0.555592	0.630463	0.804237	0.559003		0.515563	0.514012	0.955692	0.584106	0.235313	0.463307	0.768428	0.914815
	0.8345	1.28978	0.740365	1.22592	0.753991	1.9148	0.735718	0.750329		1.24853	0.421183	0.108499	0.196532	1.37928	0.472289	0.02702		0.8345	1.05864	0.694571	0.99286	0.728039	0.555592	0.630463	0.814114	0.575469		0.515563	0.514012	0.955692	0.57405	0.235313	0.463307	0.768428	0.914815
	0.8355	1.28978	0.740365	1.22592	0.753991	1.82815	0.735718	0.750329		1.42393	0.432438	0.108499	0.196532	1.39203	0.522725	0.02702		0.8355	1.05864	0.694704	0.99286	0.728039	0.555592	0.630463	0.814114	0.574414		0.515563	0.514012	1.07954	0.578941	0.235313	0.49051	0.736852	0.867494
	0.8365	1.28978	0.740365	1.22592	0.753991	1.72775	0.735718	0.750329		1.42393	0.432438	0.108499	0.196532	1.3018	0.522725	0.02702		0.8365	1.05864	0.713009	0.99286	0.737058	0.555592	0.634688	0.814114	0.580264		0.515563	0.514012	1.07954	0.540859	0.235313	0.496939	0.760185	0.867494
	0.8375	1.22503	0.740365	1.22592	0.753991	1.72775	0.735718	0.750329		1.42393	0.439319	0.108499	0.196532	1.3018	0.522725	0.02702		0.8375	1.04943	0.763531	0.982582	0.737525	0.555592	0.634688	0.822111	0.580264		0.515563	0.514012	1.07954	0.516033	0.235313	0.496939	0.768969	0.867494
	0.8385	1.22503	0.771818	1.22592	0.753991	1.75857	0.735718	0.754333		1.42393	0.439319	0.108499	0.196532	1.3018	0.507505	0.02702		0.8385	1.04943	0.7457	1.02372	0.737525	0.555592	0.571452	0.822111	0.577187		0.515563	0.448448	1.12445	0.516033	0.235313	0.514128	0.749519	0.894243
	0.8395	1.22503	0.771818	1.02466	0.753991	1.77217	0.737898	0.75048		1.3517	0.439319	0.108499	0.196532	1.30146	0.493441	0.02702		0.8395	1.04943	0.744548	1.00326	0.737525	0.555592	0.571452	0.820905	0.577187		0.513688	0.454806	1.09978	0.539914	0.126129	0.514128	0.753744	0.844982
	0.8405	1.22503	0.781246	1.02466	0.753991	1.77031	0.739179	0.75048		1.3517	0.439319	0.108499	0.196532	1.13811	0.493441	0.02702		0.8405	1.04943	0.676654	1.03157	0.737525	0.46559	0.571667	0.820905	0.581334		0.513688	0.454145	1.06592	0.540178	0.126129	0.514128	0.753744	0.844982
	0.8415	1.22503	0.781246	1.02466	0.764574	1.78421	0.745281	0.75048		1.3517	0.468576	0.108499	0.196532	1.13811	0.493888	0.02702		0.8415	1.07185	0.679165	1.03115	0.737525	0.46559	0.571667	0.765603	0.581426		0.551987	0.4364	0.938903	0.639186	0.126129	0.50328	0.753744	0.803285
	0.8425	1.27733	0.781246	1.02466	0.764574	1.61861	0.761905	0.75048		1.11565	0.468576	0.108499	0.196532	1.11749	0.493888	0.02702		0.8425	1.09516	0.684609	1.03115	0.753355	0.46559	0.571667	0.772422	0.564367		0.551987	0.4364	0.905309	0.639186	0.126129	0.507609	0.753915	0.841195
	0.8435	1.27733	0.633259	1.02466	0.764574	1.61861	0.723621	0.75048		0.939065	0.468576	0.108499	0.196532	1.10717	0.442709	0.02702		0.8435	1.09516	0.712039	1.0189	0.753355	0.46559	0.571667	0.774803	0.567653		0.614603	0.435709	0.930464	0.684287	0.126129	0.545923	0.753915	0.841195
	0.8445	1.26371	0.633259	1.02466	0.764574	1.61403	0.723621	0.715494		0.968456	0.468576	0.108499	0.22778	1.19618	0.442709	0.02702		0.8445	1.11732	0.712039	1.5552	0.75324	0.46559	0.571667	0.767787	0.566596		0.62901	0.435709	0.877997	0.650688	0.126129	0.529952	0.753915	0.839836
	0.8455	1.26371	0.633259	1.02466	0.764574	1.50438	0.719437	0.715494		0.968456	0.468576	0.108499	0.22778	1.19618	0.442709	0.02702		0.8455	1.10643	0.714649	1.55558	0.754709	0.46559	0.571667	0.767787	0.573386		0.62901	0.450023	0.877997	0.609901	0.126129	0.529952	0.74777	0.839836
	0.8465	1.26371	0.648289	1.02466	0.764574	1.49096	0.72215	0.724401		0.968456	0.468576	0.108499	0.22778	1.16865	0.430553	0.02702		0.8465	1.04365	0.687741	1.55558	0.754709	0.442797	0.571667	0.767787	0.575205		0.62901	0.435076	0.876529	0.620565	0.126129	0.529952	0.74777	0.82264
	0.8475	1.26371	0.648289	1.03381	0.764574	1.58638	0.744663	0.724401		0.968456	0.455348	0.108499	0.22778	1.16865	0.430553	0.02702		0.8475	1.04365	0.67009	0.945735	0.754709	0.442797	0.586847	0.74343	0.575205		0.62901	0.435076	0.876529	0.580294	0.126129	0.525985	0.693186	0.82264
	0.8485	1.26371	0.648289	1.03381	0.764574	1.58638	0.756759	0.723864		1.01777	0.455348	0.108499	0.22778	1.08932	0.504489	0.02702		0.8485	1.05187	0.67009	0.945735	0.748025	0.442797	0.590537	0.74343	0.577293		0.62901	0.435076	0.876529	0.580294	0.126129	0.506314	0.701035	0.762861
	0.8495	1.26371	0.648289	1.29495	0.764574	1.58638	0.751867	0.723864		1.01777	0.505907	0.108499	0.22778	1.09636	0.504489	0.02702		0.8495	1.07442	0.67009	0.933516	0.748025	0.442797	0.589253	0.739278	0.579695		0.62901	0.435076	0.878995	0.580294	0.126129	0.481974	0.683209	0.77371
	0.8505	1.26371	0.648289	1.29495	0.764574	1.59314	0.751867	0.727976		1.01777	0.505907	0.108499	0.22778	1.09694	0.504489	0.02702		0.8505	1.07442	0.67009	0.93754	0.747712	0.442797	0.589253	0.739278	0.592973		0.546697	0.435076	0.878995	0.586	0.126129	0.481974	0.671623	0.77371
	0.8515	1.29014	0.553769	1.29495	0.764574	1.61824	0.751867	0.727976		1.01777	0.505907	0.108499	0.22778	1.09694	0.466576	0.02702		0.8515	1.07442	0.67009	0.96894	0.747712	0.442797	0.589253	0.739278	0.600616		0.504825	0.431556	0.898087	0.586	0.126129	0.481974	0.671623	0.77371
	0.8525	1.25616	0.553769	1.29174	0.764574	1.6302	0.776244	0.727976		1.01777	0.497009	0.108499	0.22778	1.09694	0.470679	0.02702		0.8525	1.07442	0.67009	0.96894	0.750627	0.442797	0.587654	0.739278	0.6019		0.504825	0.431556	0.938877	0.590869	0.126129	0.481974	0.671623	0.756214
	0.8535	1.25616	0.553769	1.29174	0.775128	1.6302	0.776244	0.727976		1.01777	0.498174	0.108499	0.213502	1.08879	0.505857	0.02702		0.8535	1.07442	0.67009	0.96894	0.729215	0.442797	0.597597	0.724757	0.604636		0.504825	0.431556	0.963478	0.590869	0.126129	0.481974	0.671623	0.708499
	0.8545	1.36941	0.553769	1.29174	0.775128	1.6302	0.776244	0.727976		1.01777	0.498174	0.108499	0.213502	1.09807	0.505857	0.02702		0.8545	1.07442	0.67009	0.96894	0.721136	0.442797	0.597597	0.724757	0.625084		0.504825	0.436351	0.963478	0.613202	0.126129	0.512934	0.694868	0.715555
	0.8555	1.3909	0.553769	1.29174	0.775128	1.52556	0.776244	0.73496		1.08882	0.505894	0.108499	0.213502	1.09807	0.505857	0.02702		0.8555	1.07442	0.687233	0.96894	0.727739	0.442797	0.597597	0.724757	0.625084		0.504825	0.442035	0.963478	0.605058	0.126129	0.512934	0.694868	0.713408
	0.8565	1.3909	0.547019	1.29174	0.759422	1.52055	0.76697	0.73496		1.08882	0.505894	0.108499	0.269156	1.07439	0.497183	0.02702		0.8565	1.07442	0.687233	0.96894	0.724789	0.442797	0.605411	0.724757	0.625084		0.504825	0.452776	0.975389	0.67248	0.126129	0.513421	0.694868	0.752213
	0.8575	1.36544	0.547019	1.30995	0.759422	1.52055	0.76697	0.745236		1.08882	0.505894	0.108499	0.269156	1.06778	0.497183	0.02702		0.8575	1.07442	0.694586	0.949227	0.724789	0.442797	0.605411	0.724757	0.618559		0.504825	0.444926	1.03716	0.65978	0.126129	0.513421	0.750444	0.752213
	0.8585	1.38598	0.547019	1.30995	0.759422	1.52055	0.767227	0.745236		1.08882	0.505894	0.108499	0.269156	1.06331	0.497183	0.02702		0.8585	1.18713	0.694586	0.940156	0.724789	0.442797	0.599766	0.760212	0.591486		0.504825	0.458598	1.01817	0.65978	0.134725	0.513421	0.750444	0.775318
	0.8595	1.38598	0.535447	1.30995	0.759422	1.52055	0.767227	0.745236		1.30974	0.641715	0.108499	0.269156	1.06331	0.497183	0.02702		0.8595	1.18713	0.675501	0.948726	0.73672	0.442797	0.599766	0.760212	0.590666		0.58977	0.458598	0.991282	0.668474	0.134725	0.531827	0.763614	0.775318
	0.8605	1.38598	0.535447	1.30995	0.759422	1.62667	0.767227	0.745236		1.14883	0.641715	0.108499	0.269156	1.06331	0.497183	0.02702		0.8605	1.18713	0.675501	1.08375	0.734734	0.442797	0.616086	0.760212	0.583214		0.58977	0.458598	1.00443	0.668474	0.134725	0.531827	0.763614	0.785751
	0.8615	1.37014	0.535447	1.30995	0.737665	1.62667	0.761475	0.745236		1.14883	0.641715	0.108499	0.269156	1.06331	0.535855	0.02702		0.8615	1.18713	0.689816	1.08375	0.784262	0.442797	0.58816	0.760212	0.597853		0.581243	0.469255	1.02067	0.66521	0.134725	0.532338	0.751151	0.76847
	0.8625	1.37014	0.535447	1.30995	0.737665	1.56429	0.761475	0.745236		1.14883	0.641715	0.108499	0.269156	1.04802	0.535855	0.02702		0.8625	1.18713	0.694889	1.08375	0.784262	0.442797	0.58816	0.784751	0.612433		0.581243	0.464003	1.02067	0.66521	0.134725	0.532338	0.805406	0.755409
	0.8635	1.37014	0.535447	1.30995	0.737665	1.56429	0.771447	0.745236		1.14883	0.641715	0.108499	0.269156	0.908681	0.609627	0.02702		0.8635	1.18713	0.714411	1.08204	0.784262	0.442797	0.58816	0.819833	0.610081		0.578319	0.467773	0.901576	0.636035	0.134725	0.532338	0.737112	0.778278
	0.8645	1.37014	0.535447	1.30995	0.737665	1.86471	0.771447	0.745236		1.14883	0.641715	0.108499	0.269156	0.90521	0.609627	0.02702		0.8645	1.15586	0.707381	1.08204	0.784262	0.442797	0.58816	0.819833	0.611381		0.557949	0.467773	0.901576	0.601468	0.134725	0.544711	0.718354	0.792295
	0.8655	1.36251	0.535447	1.30995	0.737665	1.92662	0.771447	0.779002		1.14883	0.730281	0.108499	0.269156	0.90521	0.564564	0.02702		0.8655	1.15586	0.680987	1.08204	0.784262	0.442797	0.58816	0.819833	0.587528		0.557949	0.467773	0.970971	0.606194	0.134725	0.544711	0.718354	0.757323
	0.8665	1.36251	0.535447	1.30995	0.737665	1.47908	0.754644	0.779002		1.06141	0.730281	0.108499	0.269156	0.936472	0.564564	0.02702		0.8665	1.17529	0.697126	0.995455	0.775817	0.442797	0.58816	0.785355	0.587528		0.557949	0.462	0.970971	0.884459	0.134725	0.574791	0.765332	0.745686
	0.8675	1.36251	0.535447	1.30995	0.737665	1.47908	0.769217	0.779002		1.06141	0.730281	0.108499	0.269156	0.936472	0.564564	0.02702		0.8675	1.16079	0.699749	0.948337	0.782917	0.442797	0.572065	0.80048	0.587528		0.557949	0.486319	0.970971	0.963087	0.134725	0.574791	0.803965	0.787117
	0.8685	1.36251	0.535447	1.30995	0.737665	1.47134	0.769217	0.779002		1.06141	0.730281	0.108499	0.269156	0.9525	0.560214	0.02702		0.8685	1.16079	0.699749	0.948337	0.782917	0.442797	0.572065	0.80048	0.608578		0.505878	0.486319	0.932172	0.68964	0.134725	0.554383	0.79011	0.790348
	0.8695	1.36251	0.535447	1.36897	0.737665	1.47134	0.75992	0.779002		1.06141	0.730281	0.108499	0.269156	0.9525	0.560214	0.02702		0.8695	1.16079	0.699749	0.970606	0.784116	0.442797	0.572065	0.807224	0.605953		0.505878	0.485964	0.932172	0.746115	0.134725	0.554383	0.79011	0.790348
	0.8705	1.36251	0.535447	1.36897	0.746786	1.47134	0.78337	0.773283		1.06141	0.604641	0.857155	0.269156	0.9525	0.494211	0.02702		0.8705	1.16079	0.721844	0.972991	0.784718	0.442797	0.580564	0.807224	0.611896		0.517438	0.485964	0.932172	0.790048	0.283249	0.554383	0.79011	0.816132
	0.8715	1.42643	0.535447	1.36897	0.746786	1.49104	0.781578	0.773283		1.06141	0.604641	0.857155	0.270222	0.921682	0.507606	0.02702		0.8715	1.16139	0.767569	0.959466	0.79342	0.442797	0.59218	0.827585	0.598724		0.517438	0.485964	0.925397	0.813118	0.283249	0.537808	0.79011	0.857302
	0.8725	1.33937	0.535447	1.36897	0.768027	1.47593	0.781578	0.773283		1.10114	0.61377	0.857155	0.270222	0.978273	0.507606	0.02702		0.8725	1.16139	0.767569	0.957968	0.805465	0.442797	0.59218	0.827585	0.581638		0.532826	0.485964	0.928814	0.783201	0.283249	0.481675	0.79011	0.857302
	0.8735	1.32544	0.529596	1.36897	0.768027	1.47593	0.781578	0.773283		1.10114	0.61377	0.857155	0.270222	0.978273	0.507606	0.02702		0.8735	1.16116	0.767569	0.957968	0.805465	0.442797	0.59218	0.864193	0.581638		0.532826	0.467234	0.928814	0.885691	0.283249	0.481675	0.762486	0.857302
	0.8745	1.32544	0.529596	1.3705	0.768027	1.46618	0.79226	0.773283		1.10114	0.61377	0.857155	0.270222	0.978273	0.507606	0.02702		0.8745	1.16116	0.782609	0.957968	0.805465	0.565374	0.57625	0.864193	0.583656		0.532826	0.461645	0.922435	0.885691	0.283249	0.481675	0.76615	0.860324
	0.8755	1.32544	0.529596	1.3705	0.768027	1.46618	0.818551	0.773283		0.909634	0.61377	0.087352	0.270222	1.00381	0.526698	0.02702		0.8755	1.01804	0.788801	1.01128	0.804974	0.565374	0.580991	0.900818	0.58319		0.541771	0.468014	0.989323	0.842926	0.181324	0.481675	0.76615	0.754724
	0.8765	1.32544	0.529596	1.3705	0.768027	1.48716	0.819012	0.773283		0.960234	0.522217	0.087352	0.270222	1.01858	0.526698	0.02702		0.8765	1.01804	0.801799	1.01128	0.804974	0.565374	0.580991	0.927649	0.58319		0.541771	0.480483	0.989323	0.756498	0.331903	0.481675	0.76615	0.722878
	0.8775	1.32544	0.529596	1.3705	0.768027	1.49681	0.819012	0.769737		0.960234	0.522217	0.087352	0.270222	0.95499	0.506446	0.02702		0.8775	1.01804	0.784699	1.0414	0.824189	0.565374	0.574347	0.927649	0.582067		0.541771	0.480483	0.966009	0.684649	0.331903	0.547715	0.76615	0.722332
	0.8785	1.27226	0.529596	1.17691	0.768027	1.49349	0.828588	0.769737		0.960234	0.522217	0.087352	0.270222	0.950636	0.506446	0.02702		0.8785	1.08652	0.784699	1.0414	0.819769	0.565374	0.582853	0.908841	0.578466		0.541771	0.480483	0.966695	0.585369	0.331903	0.529971	0.792739	0.722332
	0.8795	1.27226	0.529596	1.17691	0.768027	1.52794	0.828588	0.769737		1.04668	0.522217	0.087352	0.270222	0.986125	0.506446	0.02702		0.8795	1.08652	0.790651	1.02786	0.811037	0.647165	0.582853	0.908841	0.578444		0.541771	0.485652	1.00319	0.518326	0.331903	0.529971	0.792739	0.722332
	0.8805	1.27976	0.584677	1.17691	0.768027	1.51488	0.828588	0.769737		1.04668	0.522217	0.087352	0.270222	0.989174	0.506446	0.02702		0.8805	1.08652	0.793016	1.03155	0.811037	0.647165	0.5849	0.801825	0.568835		0.541771	0.485652	1.09873	0.559994	0.331903	0.529971	0.756462	0.702241
	0.8815	1.27313	0.681064	1.14955	0.768027	1.53208	0.832655	0.769737		1.04668	0.501928	0.087352	0.270222	0.974556	0.488708	0.02702		0.8815	1.08652	0.769469	1.03155	0.812083	0.647165	0.592316	0.801825	0.565515		0.541771	0.470569	1.09873	0.559994	0.331903	0.529971	0.747788	0.702241
	0.8825	1.21588	0.680277	1.12253	0.768027	1.51052	0.820718	0.769737		1.04668	0.596471	0.087352	0.270222	0.974556	0.507334	0.02702		0.8825	1.08652	0.783634	1.29474	0.812083	0.647165	0.592316	0.831542	0.572457		0.61382	0.470569	1.03568	0.620097	0.331903	0.529971	0.747788	0.779633
	0.8835	1.21588	0.680277	1.12253	0.768027	1.53058	0.829406	0.769737		1.04668	0.609109	0.087352	0.270222	0.952568	0.507334	0.02702		0.8835	1.08652	0.790057	1.29474	0.824021	0.647165	0.591532	0.80886	0.575097		0.637681	0.451504	1.08403	0.489129	0.331903	0.616327	0.747788	0.792018
	0.8845	1.21936	0.720191	1.12253	0.768027	1.53058	0.825887	0.769737		1.04668	0.609109	0.087352	0.270222	0.952568	0.507334	0.02702		0.8845	1.10293	0.790057	1.29474	0.816995	0.647165	0.588585	0.80886	0.573059		0.71486	0.451504	1.08403	0.489129	0.331903	0.592776	0.761832	0.826897
	0.8855	1.21936	0.720191	1.12253	0.768027	1.53058	0.814884	0.813161		1.04668	0.627948	0.087352	0.270222	0.943135	0.509891	0.02702		0.8855	1.12472	0.780468	1.17694	0.830845	0.674581	0.603643	0.816281	0.574546		0.717804	0.451504	1.06182	0.489439	0.331903	0.650668	0.74406	0.846607
	0.8865	1.21936	0.720191	1.12253	0.768027	1.53058	0.821169	0.813161		1.04668	0.627948	0.087352	0.270222	0.979088	0.509891	0.02702		0.8865	1.12521	0.780468	1.17694	0.830845	0.674581	0.603643	0.816892	0.573616		0.717804	0.452161	1.01501	0.47331	0.267961	0.609817	0.74406	0.846607
	0.8875	1.20747	0.75448	1.12253	0.768027	1.56923	0.787282	0.802185		1.04668	0.627948	0.087352	0.270222	0.979088	0.509891	0.02702		0.8875	1.12521	0.779451	1.17694	0.830845	0.674581	0.618443	0.894593	0.563217		0.717804	0.452161	1.01501	0.462145	0.267961	0.609123	0.74406	0.839494
	0.8885	1.20747	0.75448	1.12253	0.768027	1.68084	0.791744	0.802185		0.932676	0.627948	0.087352	0.270222	1.04594	0.590954	0.02702		0.8885	1.14506	0.808189	1.17694	0.842565	0.700513	0.618443	0.894593	0.576844		0.707582	0.44647	1.007	0.481215	0.267961	0.585271	0.847117	0.779922
	0.8895	1.20747	0.75448	1.12253	0.806299	1.65911	0.790992	0.802185		0.932676	0.627948	0.087352	0.270222	1.04594	0.590954	0.02702		0.8895	1.15353	0.808189	1.23825	0.834945	0.700513	0.618443	0.8894	0.58139		0.649434	0.44647	1.007	0.481215	0.267961	0.591144	0.828124	0.776834
	0.8905	1.25001	0.75448	1.12253	0.806299	1.65911	0.790992	0.802185		0.932676	0.627948	0.087352	0.270222	1.04594	0.554272	0.02702		0.8905	1.16149	0.865178	1.21047	0.863675	0.700513	0.618443	0.8894	0.572712		0.649434	0.4297	0.918354	0.518958	0.267961	0.617261	0.922165	0.776834
	0.8915	1.25001	1.22558	1.12253	0.806299	1.65911	0.790992	0.802185		0.932676	0.62768	0.087352	0.270222	1.0315	0.554272	0.02702		0.8915	1.16149	0.865178	1.09328	0.877225	0.677495	0.629311	0.871064	0.568621		0.502881	0.426452	0.922882	0.477187	0.267961	0.617261	0.922165	0.783541
	0.8925	1.25001	1.22558	1.12253	0.806299	1.65911	0.782021	0.799946		0.932676	0.62768	0.087352	0.270222	1.00555	0.554272	0.02702		0.8925	1.18845	0.865178	1.09328	0.875291	0.677495	0.629311	0.871064	0.576684		0.502881	0.426452	0.89602	0.477187	0.309395	0.627598	0.955882	0.783541
	0.8935	1.2174	1.22558	1.12253	0.800846	1.76235	0.782021	0.799946		1.00538	0.62768	0.087352	0.270222	1.00555	0.554272	0.02702		0.8935	1.1392	0.877626	1.0981	0.875291	0.677495	0.629311	0.871064	0.578057		0.539251	0.426452	0.89602	0.461561	0.880997	0.552884	0.918832	0.735237
	0.8945	1.2174	1.22558	1.12253	0.800846	1.76235	0.782021	0.796018		1.46101	0.557499	0.087352	0.270222	1.00555	0.573535	0.02702		0.8945	1.1461	0.857485	1.16986	0.831411	0.677495	0.635858	0.871064	0.58309		0.539251	0.426452	0.89602	0.461561	0.880997	0.552884	0.959889	0.765232
	0.8955	1.23938	1.27044	1.12253	0.800846	1.70756	0.782021	0.796018		1.46101	0.557499	0.087352	0.270222	0.94828	0.600063	0.02702		0.8955	1.1461	0.841397	1.14138	0.837547	0.677495	0.635858	0.871064	0.58309		0.539251	0.426452	0.882223	0.461561	0.880997	0.504889	0.959889	0.824144
	0.8965	1.14163	1.27044	1.12253	0.828284	1.75946	0.782021	0.796018		1.8348	0.557499	0.087352	0.270222	0.94828	0.600063	0.02702		0.8965	1.1461	0.797961	1.14138	0.810282	0.506003	0.635858	0.871064	0.589786		0.563518	0.434755	1.02562	0.444764	0.880997	0.482069	0.959889	0.824144
	0.8975	1.13313	1.27044	1.12253	0.828284	1.7511	0.782021	0.796018		1.91817	0.557499	0.087352	0.270222	0.94828	0.600063	0.02702		0.8975	1.13511	0.797961	1.16712	0.810282	0.506003	0.636908	0.783067	0.589786		0.563518	0.438563	1.02562	0.444764	0.575332	0.482069	0.959889	0.824144
	0.8985	1.15998	1.27044	1.12253	0.828284	1.74511	0.782021	0.796018		1.91817	0.588976	0.087352	0.214602	0.94828	0.54884	0.02702		0.8985	1.13511	0.797961	1.20789	0.825949	0.534019	0.628061	0.783067	0.587868		0.563518	0.441155	0.850558	0.516643	0.575332	0.482069	0.935845	0.871364
	0.8995	1.15998	1.27044	1.12253	0.828284	1.6405	0.782021	0.796018		1.9527	0.728721	0.087352	0.214602	0.929238	0.54884	0.02702		0.8995	1.13511	0.78605	1.20789	0.825949	0.534019	0.628061	0.776086	0.577756		0.563518	0.441155	0.850558	0.471408	0.575332	0.482069	0.938625	0.782579
	0.9005	1.15998	1.19025	1.12253	0.828284	1.6405	0.754442	0.814307		1.45582	0.728721	0.087352	0.214602	0.963946	0.580681	0.02702		0.9005	1.13511	0.743506	1.1162	0.825949	0.534019	0.628061	0.776086	0.577756		0.560701	0.420475	0.850558	0.484971	0.575332	0.482069	0.938625	0.776982
	0.9015	1.15998	1.3042	1.12253	0.810434	1.74778	0.782826	0.814307		1.45582	0.732444	0.087352	0.214602	0.999655	0.52942	0.02702		0.9015	1.13511	0.743506	1.05107	0.825949	0.620222	0.628061	0.776086	0.590512		0.560701	0.420475	0.850558	0.49514	0.575332	0.482069	0.938625	0.776982
	0.9025	1.15998	1.3042	1.2165	0.80825	1.7236	0.768181	0.814307		1.45582	0.732444	0.087352	0.205047	0.999049	0.52942	0.02702		0.9025	1.13511	0.748313	1.05107	0.814675	0.620222	0.621536	0.877449	0.587737		0.560701	0.420475	0.848507	0.49514	0.575332	0.520483	0.874675	0.776982
	0.9035	1.15998	1.32151	1.2165	0.80825	1.73955	0.78621	0.785305		1.12484	0.732444	0.087352	0.210511	1.00158	0.52942	0.02702		0.9035	1.15249	0.740288	1.024	0.814675	0.620222	0.621536	0.877449	0.572471		0.581235	0.420475	0.848507	0.593509	0.939063	0.541053	0.818016	0.741605
	0.9045	1.15998	1.36191	1.2165	0.80825	1.73955	0.78621	0.797166		1.12484	0.732444	0.087352	0.210511	1.00135	0.530836	0.02702		0.9045	1.15249	0.740288	0.950841	0.834547	0.620222	0.652723	0.877449	0.57138		0.581235	0.420475	0.85006	0.518123	0.939063	0.541053	0.801971	0.751065
	0.9055	1.15998	1.36191	1.2165	0.80825	1.72347	0.78621	0.806613		1.12484	0.732444	0.087352	0.210511	1.00135	0.530836	0.02702		0.9055	1.15249	0.675856	0.909221	0.830171	0.620222	0.655277	0.877449	0.57138		0.63239	0.420475	0.85006	0.475589	0.939063	0.541053	0.801971	0.756746
	0.9065	1.15998	1.36191	1.14349	0.80825	1.70188	0.78621	0.806613		1.12484	0.758492	0.087352	0.210511	0.984889	0.539518	0.02702		0.9065	1.15249	0.689455	0.919905	0.829459	0.55667	0.655277	0.906479	0.57138		0.63239	0.420475	0.873805	0.478071	0.63761	0.484275	0.84725	0.735531
	0.9075	1.15998	1.36191	1.14349	0.80825	1.70188	0.764271	0.806613		1.12484	0.758492	0.087352	0.210511	1.01794	0.573142	0.02702		0.9075	1.15249	0.690083	0.941147	0.825627	0.55667	0.661052	0.894762	0.57138		0.63239	0.420475	0.873805	0.478071	0.63761	0.484275	0.84725	0.73531
	0.9085	1.15998	1.36191	1.14349	0.80825	1.73717	0.780719	0.806613		1.12484	0.758492	0.087352	0.210511	1.01794	0.570856	0.02702		0.9085	1.23965	0.692836	0.905166	0.825627	0.55667	0.661052	0.894762	0.574068		0.63239	0.423821	0.883451	0.534708	0.63761	0.484275	0.84725	0.788487
	0.9095	1.15747	1.39355	1.14349	0.81434	1.70307	0.751216	0.806613		1.08946	0.652468	0.087352	0.210511	1.01794	0.570856	0.02702		0.9095	1.23965	0.692836	0.921933	0.842362	0.55667	0.677627	0.904201	0.577949		0.589178	0.423821	0.946133	0.517752	0.63761	0.517444	0.759059	0.788487
	0.9105	1.15747	1.34922	1.14349	0.81434	1.6918	0.767911	0.806613		1.07196	0.733349	0.087352	0.208241	1.16287	0.570856	0.02702		0.9105	1.23965	0.692836	0.921933	0.837716	0.55667	0.677627	0.904201	0.56684		0.589178	0.424414	0.946133	0.536787	0.63761	0.492852	0.803151	0.846718
	0.9115	1.15747	1.34922	1.14349	0.81434	1.67589	0.731374	0.786376		1.07196	0.733471	0.087352	0.208241	1.16287	0.577375	0.02702		0.9115	1.23965	0.706871	0.909656	0.865592	0.55667	0.681074	0.904201	0.568019		0.589178	0.438341	0.896826	0.47465	0.63761	0.484231	0.818843	0.846718
	0.9125	1.13233	1.34922	1.14349	0.81434	1.67589	0.727908	0.786376		1.00966	0.728307	0.087352	0.208241	1.18873	0.53988	0.02702		0.9125	1.23965	0.706871	0.909656	0.869275	0.564742	0.673146	0.904201	0.567167		0.589178	0.438341	0.896826	0.5182	0.19336	0.479366	0.829942	0.846718
	0.9135	1.28596	1.34922	1.14349	0.81434	1.59728	0.756583	0.786376		1.00966	0.728307	0.087352	0.208241	1.05308	0.53988	0.02702		0.9135	1.23965	0.71993	0.920397	0.893689	0.725624	0.673146	0.894686	0.565828		0.485477	0.437492	0.896826	0.497632	0.19336	0.479366	0.857466	0.891331
	0.9145	1.28596	1.37503	1.14349	0.81434	1.57909	0.756583	0.786376		1.00966	0.728307	0.087352	0.208241	1.05308	0.53988	0.02702		0.9145	1.23965	0.71993	0.920397	0.932871	0.725624	0.684675	0.975378	0.565828		0.387894	0.431883	0.923527	0.497632	0.19336	0.493296	0.857466	0.839044
	0.9155	1.28596	1.37503	1.14349	0.81434	1.57909	0.756583	0.786376		1.00966	0.728307	0.087352	0.208241	1.08016	0.550612	0.02702		0.9155	1.23965	0.71993	0.920397	0.932871	0.725624	0.682147	1.04923	0.572796		0.387894	0.447936	0.947933	0.454372	0.19336	0.493296	0.857466	0.809149
	0.9165	1.51547	1.37503	1.16343	0.81434	1.5818	0.756583	0.786376		1.00966	0.728307	0.087352	0.208241	1.06156	0.519963	0.02702		0.9165	1.23965	0.71993	0.952896	0.927024	0.725624	0.682147	1.0575	0.573918		0.393943	0.447936	1.04568	0.438444	0.19336	0.491667	0.851764	0.763799
	0.9175	1.51547	1.28676	1.16343	0.823746	1.57645	0.756583	0.786376		1.01725	0.804258	0.087352	0.208241	1.04231	0.519963	0.02702		0.9175	1.23965	0.71993	1.04564	0.927024	0.837199	0.682877	1.0575	0.581665		0.449629	0.447936	1.04568	0.438444	0.19336	0.529277	0.851764	0.763799
	0.9185	1.51547	1.28676	1.16343	0.837834	1.56413	0.756583	0.786376		1.01725	0.804258	0.087352	0.21245	1.04231	0.485388	0.02702		0.9185	1.25395	0.749388	1.0582	0.927024	0.837199	0.682877	1.0575	0.580271		0.449629	0.447936	1.04568	0.431347	0.21532	0.529277	0.814662	0.784226
	0.9195	1.51547	1.28676	1.16343	0.837834	1.56413	0.745533	0.786376		1.01725	0.804258	0.087352	0.21245	1.0383	0.485388	0.02702		0.9195	1.25395	0.749388	1.0582	0.927024	0.837199	0.719769	1.0575	0.580271		0.449629	0.447936	0.954735	0.431347	0.21532	0.529277	0.772362	0.784226
	0.9205	1.51547	1.28676	1.16343	0.814444	1.53996	0.761933	0.786376		1.1081	0.804258	0.087352	0.21245	1.01985	0.5255	0.02702		0.9205	1.25395	0.783179	1.0582	0.887774	0.837199	0.719769	1.12669	0.575441		0.449629	0.447936	0.954735	0.466277	0.21532	0.529277	0.776581	0.784226
	0.9215	1.51547	1.28676	1.15504	0.814444	1.98461	0.761933	0.786376		1.1081	0.795847	0.087352	0.21245	1.00628	0.521312	0.02702		0.9215	1.2741	0.816299	1.10834	0.877339	0.856106	0.719769	1.12669	0.5636		0.449629	0.447936	0.939927	0.466277	0.21532	0.512383	0.776581	0.784226
	0.9225	1.61336	1.33651	1.15504	0.814444	1.95158	0.761933	0.786376		1.1081	0.80429	0.087352	0.21245	1.00628	0.521312	0.02702		0.9225	1.2741	0.816299	1.10834	0.90929	0.856106	0.719769	1.08712	0.5636		0.449629	0.447936	0.939927	0.459759	0.21532	0.512383	0.776581	0.735602
	0.9235	1.61336	1.33651	1.15504	0.814444	1.62787	0.761933	0.792386		1.08996	0.80429	0.087352	0.21245	1.01545	0.521312	0.02702		0.9235	1.28924	0.816299	1.11463	0.866175	0.856106	0.719446	1.08712	0.559987		0.449629	0.447936	0.937579	0.459759	0.21532	0.460986	0.776581	0.728135
	0.9245	1.61336	1.33651	1.15504	0.814444	1.62787	0.761933	0.792386		1.28329	0.959495	0.087352	0.21245	0.978781	0.521312	0.02702		0.9245	1.28924	0.816299	1.13905	0.866175	1.08124	0.719446	1.19989	0.556847		0.500764	0.469683	0.927237	0.418969	0.21532	0.460986	0.776581	0.728135
	0.9255	1.6326	1.33651	1.15504	0.814444	1.67584	0.761933	0.792386		1.28329	0.959495	0.087352	0.224298	0.978781	0.574458	0.02702		0.9255	1.28924	0.80941	1.10458	0.866067	1.08124	0.719446	1.19289	0.556932		0.500764	0.469683	0.927237	0.418969	0.21532	0.460986	0.7564	0.728135
	0.9265	1.39885	1.33651	1.15504	0.794572	1.69545	0.765498	0.792386		1.28329	0.959495	0.087352	0.224298	1.0004	0.574458	0.02702		0.9265	1.28924	0.80941	1.10458	0.866067	1.11158	0.713172	1.20314	0.561302		0.500764	0.501399	0.899141	0.642626	0.21532	0.482259	0.728215	0.765971
	0.9275	1.39885	1.30938	1.15504	0.793117	1.79632	0.765498	0.795487		1.28329	0.911002	0.087352	0.224298	0.987459	0.575761	0.02702		0.9275	1.28924	0.789521	1.0791	0.881865	1.07352	0.712154	1.2163	0.561302		0.500764	0.513153	0.915703	0.522436	0.21532	0.482259	0.728215	0.893004
	0.9285	1.11127	1.37373	1.15504	0.812353	1.79632	0.751826	0.795487		1.27141	0.942352	0.087352	0.224298	0.994834	0.574043	0.02702		0.9285	1.28924	0.789521	1.09974	0.900602	1.07352	0.686278	1.2511	0.553267		0.500764	0.513153	0.937837	0.522436	0.21532	0.526557	0.744578	0.893004
	0.9295	1.11127	1.37373	1.15504	0.786134	1.70662	0.748102	0.795487		1.27141	0.850364	0.087352	0.224298	0.992185	0.574043	0.02702		0.9295	1.27279	0.791839	1.09974	0.900602	1.07352	0.686278	1.18113	0.549643		0.500764	0.520311	0.937837	0.529256	0.21532	0.535357	0.744578	0.867621
	0.9305	1.11127	1.37373	1.15504	0.786134	1.69772	0.749462	0.795487		0.999182	0.850364	0.087352	0.224298	0.992185	0.562498	0.02702		0.9305	1.27279	0.74724	1.04636	0.932299	1.14535	0.686278	1.18113	0.549643		0.556567	0.520311	0.937837	0.553595	0.693132	0.535357	0.735518	0.867621
	0.9315	1.11127	1.37373	1.15504	0.786134	1.69772	0.771465	0.78525		0.999182	0.944308	0.087352	0.224298	1.04499	0.562498	0.02702		0.9315	1.31486	0.773056	1.08999	0.932299	1.14535	0.686278	1.18113	0.558868		0.556567	0.520311	0.955554	0.493491	0.693132	0.535357	0.735518	0.867621
	0.9325	1.09495	1.28713	1.28893	0.786134	1.55257	0.771465	0.78525		0.999182	0.944308	0.087352	0.224298	1.09824	0.560304	0.02702		0.9325	1.31228	0.806729	1.05406	0.934166	0.930098	0.686498	1.18113	0.565156		0.556567	0.520311	0.955554	0.486512	0.693132	0.603577	0.755857	0.772376
	0.9335	1.09495	1.22618	1.41793	0.786134	1.54371	0.771465	0.78525		0.999182	0.944308	0.087352	0.224298	1.09824	0.560304	0.02702		0.9335	1.29663	0.827251	1.03284	0.958577	0.930098	0.707204	1.17408	0.560001		0.489803	0.516711	0.983409	0.501404	0.827899	0.603577	0.755857	0.768903
	0.9345	1.09495	1.22618	1.41793	0.786134	1.50677	0.76215	0.78525		0.999182	0.944308	0.087352	0.212903	1.1079	0.560304	0.02702		0.9345	1.28343	0.827251	1.03284	0.951908	0.930098	0.69644	1.17994	0.560001		0.616797	0.516711	1.03115	0.635069	0.827899	0.603577	0.755857	0.768903
	0.9355	1.09495	1.22618	1.41793	0.786134	1.51237	0.759339	0.78525		0.999182	0.944308	0.087352	0.212903	1.09605	0.560304	0.02702		0.9355	1.26658	0.830894	1.04857	0.949955	1.01368	0.69958	1.27317	0.568285		0.616797	0.516711	1.04201	0.656233	0.827899	0.608198	0.802032	0.807822
	0.9365	1.0517	1.24312	1.41793	0.786134	1.49198	0.759339	0.801052		0.999182	0.902695	0.087352	0.212903	1.05472	0.559727	0.02702		0.9365	1.26658	0.847617	1.06583	0.949955	1.16372	0.687148	1.25958	0.574107		0.616797	0.504769	1.04201	0.656233	0.284583	0.608198	0.802032	0.807822
	0.9375	1.0517	1.24312	1.41793	0.786134	1.49198	0.764335	0.801052		0.999182	0.902695	0.087352	0.212903	1.05472	0.559727	0.02702		0.9375	1.26658	0.847617	1.10549	0.961795	1.16372	0.687148	1.39607	0.574107		0.604447	0.504769	1.04201	0.62979	0.284583	0.590241	0.80071	0.823896
	0.9385	1.00963	1.24312	1.41793	0.79108	1.49198	0.733832	0.801052		0.999182	0.951048	0.087352	0.212903	1.06576	0.535091	0.02702		0.9385	1.3485	0.847617	1.24533	0.971123	1.16372	0.687711	1.39607	0.571115		0.547016	0.500842	1.04201	0.582136	0.284583	0.614583	0.765144	0.833996
	0.9395	1.00963	1.24312	1.41793	0.79108	1.50913	0.737177	0.83491		1.03209	0.951048	0.087352	0.212903	1.07628	0.486718	0.02702		0.9395	1.3485	0.8125	1.19307	0.971123	1.16372	0.687711	1.39607	0.577891		0.415261	0.500842	1.11892	0.582136	0.284583	0.667678	0.765144	0.9007
	0.9405	1.0352	1.24312	1.41793	0.79108	1.52367	0.737177	0.83491		1.03209	0.951048	0.087352	0.212903	1.05683	0.486718	0.02702		0.9405	1.3485	0.8125	1.19307	0.952261	1.2018	0.687711	1.39607	0.574874		0.409534	0.499039	1.11404	0.56947	0.284583	0.688074	0.739641	0.894521
	0.9415	1.0352	1.24312	1.41793	0.795361	1.51028	0.737177	0.832332		1.03209	0.951048	0.087352	0.212903	0.989752	0.486718	0.02702		0.9415	1.3485	0.808322	1.19307	0.953909	1.2018	0.687711	1.45001	0.584323		0.409534	0.499039	1.08099	0.56947	0.303162	0.615012	0.739641	0.894521
	0.9425	1.0352	1.37825	1.41793	0.795361	1.52867	0.751593	0.832332		1.02941	0.951048	0.087352	0.212903	0.934353	0.486718	0.02702		0.9425	1.3485	0.791454	1.20282	0.943237	1.2018	0.675421	1.19005	0.591347		0.409534	0.499039	1.08099	0.671812	0.303162	0.615012	0.739641	0.924755
	0.9435	1.08616	1.37825	1.41793	0.795361	1.53048	0.751593	0.832332		1.02941	0.951048	0.087352	0.212903	0.938018	0.562622	0.02702		0.9435	1.34997	0.790037	1.10401	0.943237	1.36984	0.675421	1.22125	0.591347		0.409534	0.481472	0.953425	0.653286	0.303162	0.615012	0.739641	0.924755
	0.9445	1.08616	1.44109	1.41793	0.861228	1.53048	0.751593	0.832332		1.02941	0.987465	0.087352	0.212903	0.938018	0.562622	0.02702		0.9445	1.34997	0.827484	1.11989	0.948717	1.38209	0.675421	1.31573	0.591347		0.435943	0.481472	1.00032	0.545504	0.303162	0.615657	0.711997	0.904037
	0.9455	1.1195	1.59528	1.41793	0.861228	1.56038	0.751593	0.836127		1.02941	0.987465	0.087352	0.212903	0.938018	0.562622	0.02702		0.9455	1.38146	0.827484	1.10796	0.948717	1.38209	0.714813	1.31573	0.596538		0.435943	0.482362	1.00032	0.510421	0.303162	0.563823	0.734406	0.845371
	0.9465	1.1195	1.59528	1.41793	0.861228	1.74338	0.751593	0.836127		0.967713	0.987465	0.087352	0.212903	0.938018	0.562622	0.02702		0.9465	1.4403	0.958785	1.10796	0.948717	1.20851	0.708461	1.31573	0.600515		0.435943	0.486511	1.00032	0.538408	0.303162	0.563133	0.818216	0.862804
	0.9475	1.1195	1.59528	1.41793	0.861228	1.74395	0.756099	0.836127		1.10394	1.12084	0.087352	0.212903	0.937564	0.562622	0.02702		0.9475	1.47619	0.948338	1.12157	0.978633	1.20851	0.723774	1.33567	0.600515		0.435943	0.49739	1.06189	0.538408	0.695798	0.563133	0.845168	0.85533
	0.9485	1.13674	1.59528	1.41793	0.861228	1.74395	0.749505	0.82041		1.16172	1.12084	0.087352	0.212903	0.937564	0.560335	0.02702		0.9485	1.47619	0.948338	1.12157	0.978633	1.4276	0.723774	1.33499	0.600515		0.435943	0.49095	1.03351	0.593026	0.695798	0.598138	0.845168	0.85533
	0.9495	1.11776	1.59528	1.41793	0.861228	1.72604	0.764283	0.82041		1.16172	1.12084	0.087352	0.212903	0.937564	0.560335	0.02702		0.9495	1.47619	0.945321	1.4574	0.913147	1.37658	0.754952	1.33499	0.600515		0.435943	0.49095	1.03351	0.593026	0.695798	0.598138	0.82769	0.85533
	0.9505	1.11776	1.59528	1.41793	0.861228	1.5254	0.764283	0.82041		1.08174	1.13133	0.087352	0.212903	0.982339	0.560335	0.02702		0.9505	1.47886	0.941482	1.4574	0.917249	1.48736	0.754952	1.42772	0.596024		0.435943	0.49785	1.08815	0.523311	0.75163	0.598138	0.832254	0.858431
	0.9515	1.13969	1.64752	1.41793	0.861228	1.53242	0.765831	0.82041		1.08174	1.13133	0.087352	0.212903	0.982339	0.524346	0.02702		0.9515	1.47071	0.98993	1.4574	0.929467	1.48736	0.771635	1.42772	0.607387		0.454734	0.49785	1.08815	0.523311	0.75163	0.598138	0.832254	0.851411
	0.9525	1.13969	1.64118	1.41793	0.878054	1.53574	0.765831	0.82041		1.08174	1.1399	0.087352	0.212903	0.982339	0.524346	0.02702		0.9525	1.47071	0.999115	1.46738	0.929825	1.48736	0.776949	1.49378	0.626539		0.48449	0.471002	1.27421	0.523311	0.75163	0.646468	0.846974	0.891694
	0.9535	1.25841	1.64118	1.41793	0.878054	1.53574	0.766399	0.82041		1.13727	1.18239	0.087352	0.243965	0.982339	0.510663	0.02702		0.9535	1.47071	1.01097	1.28263	0.929825	1.32042	0.79255	1.50361	0.626539		0.48449	0.461548	1.21828	0.544294	0.787172	0.671612	0.846974	0.891694
	0.9545	1.30508	1.53564	1.36483	0.878054	1.49543	0.783293	0.84763		1.13727	1.18239	0.087352	0.243965	0.972606	0.514747	0.02702		0.9545	1.43785	1.01097	1.17231	0.918114	1.06628	0.825277	1.57849	0.680988		0.48449	0.461548	1.174	0.544294	0.787172	0.671612	0.780178	0.870851
	0.9555	1.31777	1.69176	1.52005	0.878054	1.53219	0.78886	0.84763		1.13727	1.23017	0.087352	0.243965	0.972606	0.461894	0.02702		0.9555	1.43785	1.01097	1.14886	0.970422	1.06628	0.825277	1.54693	0.68787		0.48449	0.484145	1.25133	0.567569	0.787172	0.671612	0.768831	0.911421
	0.9565	1.31777	1.69176	1.52005	0.878054	1.53734	0.78886	0.858242		1.13727	1.23017	0.087352	0.243965	0.91579	0.47262	0.02702		0.9565	1.43785	1.04527	1.11356	0.955138	1.06628	0.825277	1.64029	0.68787		0.48449	0.480146	1.22302	0.567569	0.787172	0.671612	0.768831	0.911421
	0.9575	1.31777	1.69176	1.52005	0.878054	1.53734	0.78886	0.858242		1.1279	1.24237	0.087352	0.243965	0.967997	0.387531	0.02702		0.9575	1.43785	1.03825	1.11356	0.955138	1.19319	0.825277	1.64029	0.691803		0.48449	0.480146	1.02011	0.509384	0.751498	0.646055	0.737529	0.882417
	0.9585	1.31777	1.69176	1.52005	0.878054	1.57598	0.790638	0.858242		1.1279	1.24237	0.087352	0.243965	0.967997	0.387531	0.02702		0.9585	1.43785	1.05926	1.16336	0.932769	1.19319	0.816434	1.7028	0.69396		0.48449	0.480146	1.01258	0.509384	0.751498	0.646055	0.732686	0.863202
	0.9595	1.31777	1.69176	1.59159	0.878054	1.57598	0.790638	0.858242		1.1279	1.27924	0.087352	0.243965	0.967997	0.429058	0.02702		0.9595	1.43785	1.12877	1.16336	0.941909	1.08162	0.816434	1.7028	0.698185		0.48449	0.480146	1.041	0.509384	1.94937	0.646055	0.732686	0.917058
	0.9605	1.31777	1.65133	1.59159	0.878054	1.6307	0.790638	0.872409		1.1279	1.39728	0.087352	0.243965	0.967997	0.429058	0.02702		0.9605	1.4456	1.14757	1.13773	0.941909	1.08162	0.816434	1.85121	0.723513		0.561075	0.480146	0.987995	0.528728	0.910853	0.646055	0.732686	0.92269
	0.9615	1.31777	1.69807	1.84323	0.878054	1.68344	0.790638	0.872409		1.04006	1.39728	0.087352	0.243965	1.00879	0.372612	0.02702		0.9615	1.4456	1.142	1.14367	0.935982	1.09615	0.833253	1.7843	0.737671		0.590901	0.480146	0.987995	0.573271	0.910853	0.665054	0.732686	0.92269
	0.9625	1.31777	1.85078	1.84323	0.878054	1.65975	0.811233	0.872409		1.04006	1.45989	0.087352	0.243965	1.00879	0.372612	0.02702		0.9625	1.4456	1.142	1.14367	0.935982	1.22127	0.856709	1.80184	0.752055		0.623949	0.476037	1.09342	0.542782	0.910853	0.665054	0.732686	0.92269
	0.9635	1.31777	1.95114	1.84323	0.878054	1.65975	0.811233	0.872409		1.10066	1.45989	0.087352	0.243965	0.992704	0.372612	0.02702		0.9635	1.4456	1.10631	1.14367	0.949463	1.46863	0.868766	1.80184	0.752963		0.635355	0.514186	1.09342	0.532988	0.910853	0.694277	0.732686	0.92269
	0.9645	1.24458	1.95114	1.94179	0.878054	1.62105	0.832626	0.872409		1.10066	1.52065	0.087352	0.243965	0.951536	0.372612	0.02702		0.9645	1.4456	1.10631	1.12855	0.961537	1.46863	0.868766	1.90734	0.742291		0.635355	0.514186	1.09471	0.532988	0.910853	0.755084	0.732686	0.912647
	0.9655	1.24458	1.97722	1.94179	0.878054	1.55729	0.835527	0.872409		1.10066	1.52065	0.087352	0.243965	0.949431	0.372612	0.02702		0.9655	1.47236	1.20059	1.11142	0.961537	1.45455	0.910258	1.87241	0.733592		0.635355	0.514186	1.507	0.561885	0.84507	0.723526	0.714923	0.912647
	0.9665	1.24458	1.9827	1.94179	0.899291	1.58558	0.835527	0.888355		1.10066	1.52065	0.087352	0.243965	0.949431	0.372612	0.02702		0.9665	1.47236	1.19217	1.1632	0.945722	1.45455	0.910258	1.95264	0.729307		0.635355	0.515644	1.42456	0.50543	0.84507	0.729275	0.714923	0.961651
	0.9675	1.29461	2.01961	1.94179	0.899291	1.58558	0.897926	0.888355		1.10066	1.52233	0.087352	0.243965	0.95846	0.372612	0.02702		0.9675	1.47236	1.23512	1.13939	0.931771	1.45455	0.903711	2.26017	0.729307		0.635355	0.51429	1.35176	0.51383	0.84507	0.729275	0.714923	0.995133
	0.9685	1.29461	2.01961	1.94179	0.899291	1.79602	0.897773	0.888355		1.11885	1.52315	0.087352	0.243965	0.95846	0.372612	0.02702		0.9685	1.51389	1.28079	1.22645	0.948255	1.45455	0.903711	2.25529	0.688884		0.635355	0.51429	1.44108	0.51383	0.84507	0.776064	0.730737	0.995133
	0.9695	1.29461	2.01961	1.94179	0.899291	1.83801	0.897773	0.888355		1.29652	1.58386	0.087352	0.243965	0.95846	0.37384	0.02702		0.9695	1.61287	1.31535	1.27212	0.948255	1.45455	0.858597	2.29045	0.688884		0.635355	0.51429	1.44108	0.510985	0.434764	0.776064	0.737751	0.957877
	0.9705	1.29461	2.0101	1.94179	0.899291	1.95154	0.902843	0.888355		1.29652	1.58386	0.087352	0.243965	0.976338	0.37384	0.02702		0.9705	1.61287	1.31549	1.27212	0.968008	1.45455	0.898477	2.49325	0.714329		0.635355	0.51429	1.28075	0.530845	0.434764	0.677052	0.737751	0.939612
	0.9715	1.33358	2.22763	1.94179	0.899291	1.95154	0.877706	0.920184		1.29652	1.58386	0.087352	0.243965	0.976338	0.366499	0.02702		0.9715	1.666	1.3248	1.27212	0.990087	1.27279	0.898477	2.31989	0.712305		0.635355	0.537123	1.28195	0.533206	0.434764	0.619848	0.87136	0.939612
	0.9725	1.33358	2.22763	1.94179	0.899291	1.75405	0.877706	0.920184		1.29652	1.58386	0.087352	0.243965	0.956148	0.366499	0.02702		0.9725	1.666	1.27373	1.27212	0.990529	1.27279	0.894798	2.3811	0.717639		0.56776	0.548341	1.49367	0.5314	0.434764	0.619848	0.91271	0.939612
	0.9735	1.33358	2.22763	2.06791	0.877858	1.75405	0.874251	0.920184		1.47809	1.58386	0.087352	0.243965	1.07469	0.366499	0.02702		0.9735	1.67268	1.29695	1.30825	0.996296	1.27279	0.894798	2.37155	0.735993		0.572668	0.548341	1.49367	0.5314	0.434764	0.679192	0.943473	0.896593
	0.9745	1.33358	2.36143	2.06791	0.877858	1.82916	0.874251	0.920184		1.42786	1.58386	0.087352	0.243965	1.07536	0.385265	0.02702		0.9745	1.68024	1.3088	1.30825	1.04875	1.25097	0.92068	2.52535	0.735993		0.567814	0.581831	1.57665	0.519619	0.911209	0.679192	0.944818	0.935195
	0.9755	1.33358	2.37119	2.06791	0.877858	1.82916	0.85835	0.920184		1.42786	1.58386	0.087352	0.243965	1.04976	0.385265	0.02702		0.9755	1.67869	1.3257	1.38115	1.13481	1.25097	1.01816	2.76312	0.735993		0.567814	0.581831	1.49614	0.519619	0.911209	0.604081	1.05011	0.935195
	0.9765	1.35956	2.40679	2.06791	0.877858	1.67592	0.853107	0.920184		1.2688	1.58386	0.087352	0.243965	1.04976	0.385265	0.02702		0.9765	1.67869	1.3257	1.44421	1.13463	1.25097	1.02978	2.81275	0.791114		0.592657	0.645372	1.4153	0.509651	0.911209	0.604081	1.05011	0.950302
	0.9775	1.35737	2.46058	2.06791	0.925977	1.6262	0.837015	0.920184		1.2688	1.64341	0.087352	0.243965	0.974502	0.385265	0.02702		0.9775	1.74974	1.32319	1.52077	1.13463	1.38734	1.02978	2.81275	0.810432		0.592657	0.645372	1.4153	0.509651	1.0716	0.604081	1.11995	0.950302
	0.9785	1.37958	2.45098	2.06791	0.925977	1.70226	0.837015	0.963512		1.2675	1.66458	0.087352	0.243965	0.992337	0.437022	0.02702		0.9785	1.74974	1.55284	1.51786	1.15631	1.38734	1.06975	2.81741	0.82682		0.528211	0.654912	1.49258	0.698568	1.0716	0.636623	1.11831	1.00199
	0.9795	1.37958	2.58148	2.2949	0.925977	1.70226	0.862197	0.963512		1.2675	1.73141	0.087352	0.243965	0.992337	0.437022	0.02702		0.9795	1.74974	1.52612	1.63276	1.15631	1.38734	1.09626	2.94008	0.801603		0.528211	0.654912	1.49258	0.594974	1.0716	0.636623	1.11831	1.01555
	0.9805	1.33303	2.58148	2.2949	0.925977	1.67675	0.893411	1.01472		1.2675	1.79119	0.087352	0.243965	0.982376	0.437022	0.02702		0.9805	1.7524	1.70718	1.63276	1.18384	1.38734	1.12824	2.98475	0.806487		0.528211	0.672207	1.49766	0.577543	1.69687	0.664719	1.16834	0.973427
	0.9815	1.41624	2.58148	2.2949	0.925977	1.68217	0.913882	1.01472		1.2675	2.08493	0.087352	0.212715	1.02711	0.475311	0.02702		0.9815	1.7524	1.70718	1.76343	1.18301	1.38734	1.14609	3.12558	0.806487		0.528211	0.672207	1.74224	0.58509	1.69687	0.67295	1.18655	0.972555
	0.9825	1.41709	2.7222	2.2949	0.925977	1.69777	0.877132	1.01472		1.2675	2.27566	0.087352	0.212715	1.02711	0.475311	0.02702		0.9825	1.7524	1.78761	1.96001	1.18301	1.38734	1.1653	3.07515	0.814465		0.528211	0.672207	2.16031	0.640959	1.69687	0.67295	1.31879	0.962654
	0.9835	1.41709	2.94871	2.33117	0.973745	1.68958	0.903031	1.14004		1.31519	2.27566	0.087352	0.212715	1.02711	0.510379	0.02702		0.9835	1.76192	1.88957	1.91302	1.18301	1.4202	1.23372	3.19547	0.827552		0.528211	0.674361	2.08739	0.714654	1.69687	0.677849	1.32463	0.978227
	0.9845	1.53062	2.96282	2.33117	0.973745	1.68958	0.903031	1.14004		1.43861	2.38428	0.087352	0.212715	1.02711	0.514408	0.02702		0.9845	1.7409	1.95215	1.98813	1.21991	1.4202	1.23372	3.24634	0.907024		0.558778	0.74268	2.28821	0.89147	1.67179	0.677849	1.32463	0.998547
	0.9855	1.53062	2.96282	2.71207	0.973745	1.68958	0.903031	1.14004		1.43861	2.52799	0.087352	0.212715	1.02883	0.514408	0.02702		0.9855	1.7409	1.96993	1.99408	1.19666	1.4202	1.2753	3.30464	0.944202		0.558778	0.74796	1.82833	0.836591	1.67179	0.677849	1.43135	0.998547
	0.9865	1.53062	2.96282	2.86759	0.973745	1.68958	0.903693	1.4506		1.43861	2.67235	0.087352	0.212715	0.984009	0.514408	0.02702		0.9865	1.76929	2.02403	1.99408	1.29797	1.48906	1.25669	3.60723	0.944202		0.531979	0.74796	1.80346	0.836591	1.67179	0.677849	1.43135	0.998547
	0.9875	1.66172	3.06864	2.86759	0.948706	1.6895	0.981286	1.4506		1.39573	2.76995	0.087352	0.212715	0.951623	0.567025	0.02702		0.9875	1.82553	2.06142	2.12467	1.31967	1.66231	1.26243	3.58881	0.955313		0.553713	0.901854	2.26719	0.773796	1.67179	0.688474	1.43135	1.0129
	0.9885	1.66172	3.06864	2.86759	0.948706	1.66982	0.985878	1.56394		1.34345	2.62644	0.087352	0.212715	0.951623	0.619989	0.02702		0.9885	1.82553	2.02175	2.08067	1.31967	1.66231	1.32665	3.99078	0.960277		0.718547	0.949173	1.97074	0.773796	1.67179	0.792321	1.89284	1.08877
	0.9895	1.88691	3.06864	3.2289	0.999988	1.66982	0.985878	1.56394		1.34345	2.62644	0.087352	0.212715	0.958329	0.619989	0.02702		0.9895	1.87861	2.10047	1.99983	1.39475	1.72538	1.33103	4.12365	0.993186		0.718547	1.00977	1.97074	0.842728	2.58317	0.866262	2.5009	1.08877
	0.9905	1.88691	3.15919	3.2289	0.999988	1.66982	0.996651	1.56394		1.3787	2.62644	0.087352	0.212715	0.958329	0.652791	0.02702		0.9905	1.87861	2.058	1.99983	1.44651	1.7229	1.35121	4.38922	1.06269		0.718547	1.00977	2.31639	0.855381	2.58317	0.99726	2.5009	1.31905
	0.9915	2.06354	3.30895	3.2289	0.999988	1.66982	0.996651	1.56394		1.3787	2.70229	0.087352	0.212715	0.976679	0.752431	0.02702		0.9915	1.87861	2.03964	2.23909	1.45013	1.75398	1.41844	4.2665	1.10608		0.718547	1.00977	2.26509	0.942155	3.14393	0.99726	2.15092	1.24429
	0.9925	2.06354	3.5541	3.33317	0.999988	1.66982	1.03268	1.56394		1.62027	2.71114	0.087352	0.212715	0.969213	0.747104	0.02702		0.9925	1.87861	2.27838	2.48208	1.38579	1.75398	1.41844	4.37098	1.21026		0.712979	1.20826	2.20738	0.888027	3.54765	0.99726	2.25841	1.24429
	0.9935	2.06354	3.5541	3.33317	1.04168	1.66982	1.03268	1.56394		1.62027	2.7132	0.087352	0.212715	1.23236	0.747104	0.02702		0.9935	1.87861	2.27838	2.52576	1.42586	1.88522	1.47581	4.51518	1.23273		0.712979	1.37924	2.14777	1.00972	3.74437	0.99726	2.49573	1.15216
	0.9945	2.35543	3.49566	3.33317	1.04168	1.66982	1.046	1.75603		1.62027	2.7132	0.087352	0.193413	1.23236	0.883396	0.02702		0.9945	1.949	2.61021	2.46385	1.39062	1.88522	1.5422	4.52696	1.42434		0.712979	1.40806	2.19529	0.981815	3.88816	0.99726	2.926	1.15216
	0.9955	2.35543	3.39993	3.33317	1.06706	1.7388	1.07999	1.96362		1.62027	2.77092	0.087352	0.193413	1.23236	0.883396	0.02702		0.9955	1.949	2.88358	2.14196	1.39062	1.88522	1.64761	4.61813	1.83095		0.712979	1.50269	2.3755	0.981333	5.33323	0.99726	2.99973	1.19762
	0.9965	2.35543	3.46428	3.33317	1.06706	1.7388	1.14557	1.96362		1.62027	2.73331	0.087352	0.193413	1.22522	0.883396	0.02702		0.9965	1.98623	2.93376	2.14998	1.45659	2.00629	1.68332	5.06794	1.868		0.712979	1.70402	2.54237	1.39609	4.8265	1.10977	3.16569	1.19762
	0.9975	2.35543	3.55004	3.33317	1.06706	1.7388	1.19966	1.96362		1.62027	2.73331	2.47452	2.47452	1.22522	0.883396	0.02702		0.9975	1.95478	3.05836	2.11646	1.45659	2.10246	1.69281	4.86175	2.19935		0.851506	1.89417	2.79917	0.996532	4.88577	1.23386	3.31183	1.25906
	0.9985	2.49833	3.90095	4.04379	1.06706	1.7388	1.32166	1.96362		1.62027	3.06655	2.47452	2.47452	1.25912	0.903786	0.02702		0.9985	2.05927	3.11302	2.16519	1.55926	2.33066	1.70817	5.04471	2.27861		0.851506	2.20509	2.87165	1.0227	5.14603	1.29121	3.52555	1.39569
	0.9995	2.62515	3.82307	5.05407	1.06706	1.7388	1.47683	1.96362		1.91506	3.18063	3.67144	3.67144	1.15935	0.84441	0.02702		0.9995	2.11422	3.23047	2.16519	1.57924	2.33066	1.79205	15.9041	2.62884		0.851506	2.40242	2.87165	1.11323	4.15538	1.33692	4.04582	1.62475
	1.0005	2.63653	3.98738	5.49043	1.06706	2	1.5287	2.32304		1.96467	3.14643	3.67144	3.67144	1.15935	0.84441	0.02702		1.0005	2.11422	3.44351	2.3101	1.74072	2.54058	1.86358	5.29279	3.26785		1.02532	2.51172	2.71753	1.50977	4.00382	1.45815	4.01996	1.6798

## Sheet: E
	DATA						STATISTICS
	Pre-Inspiratory Neuron Mean IBI spiking (intrinsically quiescent)						Two-Way RM ANOVA
	Oprm1+ (n=3)						Source of Variation	% of total variation	P value	P value summary	Significant?
	Baseline	50nM	100nM	200nM	300nM		Treatment Factor	71.22	<0.0001	****	Yes
	1	0.337476	0.168804	0.078561	0		Group Factor	11.01	0.0446	*	Yes
	1	0.447564	0.365763	0.107213	0.14877
	1	0.335459	0.0237868	0.0645128	0.00714589		Bonferroni's multiple comparisons tests Oprm1+ vs. Oprm1-
							Treatment	mean diff.	95.00% CI of diff.	Significant?	Summary	Adjusted P Value
	Oprm1- (n=2)						Baseline	0
	Baseline	50nM	100nM	200nM	300nM		50nM	-0.2485	-0.6149 to 0.1178	No	ns	0.107
	1	0.620737	0.350306	0.204069	0.345204		100nM	-0.2392	-0.9684 to 0.4900	No	ns	0.7518
	1	0.623286	0.500379	0.511303	0.517694		200nM	-0.2743	-9.586 to 9.037	No	ns	>0.9999
							300nM	-0.3795	-1.800 to 1.041	No	ns	0.4151

## Sheet: F
	DATA (Intrinsically quiescent pre-Inspiratory neuron spike frequency across IBI)
		Oprm1+ neurons (n=3)									Oprm1- neurons (n=2)
		BASELINE				DAMGO (300nM)					BASELINE			DAMGO (300nM)
	X (normalized IBI)	Y (spike frequency nomralized to mean spike rate)				Y (spike frequency nomralized to mean spike rate)				X (normalized IBI)	Y (spike frequency nomralized to intrinsic spike rate)			Y (spike frequency nomralized to intrinsic spike rate)
	bin center	Replicate #1	Replicate #2	Replicate #3		Replicate #1	Replicate #2	Replicate #3		bin center	Replicate #1	Replicate #2		Replicate #1	Replicate #2
	0.0005	0.828881	0.414052	0.946946		0.044129	0.194524	0.044604		0.0005	0.525078	0.464453		0.218221	0.157776
	0.0015	0.828881	0.414052	0.946946		0.044129	0.194524	0.044604		0.0015	0.525078	0.464453		0.218221	0.157776
	0.0025	0.828881	0.414052	0.946946		0.044129	0.194524	0.044604		0.0025	0.525078	0.464453		0.218221	0.157776
	0.0035	0.828881	0.414052	0.946946		0.044129	0.194524	0.044604		0.0035	0.525078	0.464453		0.218221	0.157776
	0.0045	0.828881	0.414052	0.946946		0.044129	0.194524	0.044604		0.0045	0.525078	0.464453		0.218221	0.157776
	0.0055	0.828881	0.414052	0.946946		0.044129	0.194524	0.044604		0.0055	0.525078	0.464453		0.218221	0.157776
	0.0065	0.828881	0.414052	0.946946		0.044129	0.194524	0.044604		0.0065	0.525078	0.464453		0.218221	0.157776
	0.0075	0.828881	0.414052	0.946946		0.044129	0.194524	0.044604		0.0075	0.525078	0.464453		0.218221	0.157776
	0.0085	0.828881	0.414052	0.946946		0.044129	0.194524	0.044604		0.0085	0.525078	0.464453		0.218221	0.157776
	0.0095	0.828881	0.414052	0.946946		0.044129	0.194524	0.044604		0.0095	0.525078	0.464453		0.218221	0.157776
	0.0105	0.828881	0.414052	0.946946		0.044129	0.194524	0.044604		0.0105	0.525078	0.464453		0.218221	0.157776
	0.0115	0.828881	0.414052	0.946946		0.044129	0.194524	0.044604		0.0115	0.525078	0.464453		0.218221	0.157776
	0.0125	0.828881	0.414052	0.946946		0.044129	0.194524	0.044604		0.0125	0.525078	0.464453		0.218221	0.157776
	0.0135	0.828881	0.414052	0.946946		0.044129	0.194524	0.044604		0.0135	0.525078	0.464453		0.218221	0.157776
	0.0145	0.828881	0.414052	0.946946		0.044129	0.194524	0.044604		0.0145	0.525078	0.464453		0.218221	0.157776
	0.0155	0.828881	0.414052	0.946946		0.044129	0.194524	0.044604		0.0155	0.525078	0.464453		0.218221	0.157776
	0.0165	0.828881	0.414052	0.946946		0.044129	0.194524	0.044604		0.0165	0.525078	0.464453		0.218221	0.157776
	0.0175	0.828881	0.414052	0.946946		0.044129	0.194524	0.044604		0.0175	0.525078	0.464453		0.218221	0.157776
	0.0185	0.828881	0.414052	0.946946		0.044129	0.194524	0.044604		0.0185	0.525078	0.464453		0.218221	0.157776
	0.0195	0.828881	0.414052	0.946946		0.044129	0.194524	0.044604		0.0195	0.525078	0.464453		0.218221	0.157776
	0.0205	0.828881	0.414052	0.946946		0.044129	0.194524	0.044604		0.0205	0.525078	0.464453		0.218221	0.157776
	0.0215	0.828881	0.414052	0.946946		0.044129	0.194524	0.044604		0.0215	0.525078	0.464453		0.218221	0.157776
	0.0225	0.828881	0.414052	0.946946		0.044129	0.194524	0.044604		0.0225	0.525078	0.464453		0.218221	0.157776
	0.0235	0.828881	0.414052	0.946946		0.044129	0.194524	0.044604		0.0235	0.46254	0.464453		0.218221	0.157776
	0.0245	0.828881	0.414052	0.946946		0.044129	0.194524	0.044604		0.0245	0.445738	0.464453		0.218221	0.157776
	0.0255	0.828881	0.414052	0.946946		0.044129	0.194524	0.044604		0.0255	0.445738	0.464453		0.218221	0.157776
	0.0265	0.828881	0.414052	0.946946		0.044129	0.194524	0.044604		0.0265	0.445738	0.464453		0.218221	0.157776
	0.0275	0.828881	0.414052	0.946946		0.044129	0.194524	0.044604		0.0275	0.445738	0.464453		0.218221	0.157776
	0.0285	0.828881	0.414052	0.946946		0.044129	0.194524	0.044604		0.0285	0.445738	0.464453		0.218221	0.157776
	0.0295	0.828881	0.414052	0.946946		0.044129	0.194524	0.044604		0.0295	0.445738	0.464453		0.218221	0.157776
	0.0305	0.596197	0.414052	0.946946		0.044129	0.194524	0.044604		0.0305	0.445738	0.464453		0.218221	0.157776
	0.0315	0.596197	0.414052	0.946946		0.044129	0.194524	0.044604		0.0315	0.445738	0.464453		0.218221	0.157776
	0.0325	0.596197	0.414052	0.946946		0.044129	0.194524	0.044604		0.0325	0.445738	0.464453		0.218221	0.157776
	0.0335	0.596197	0.414052	0.946946		0.044129	0.194524	0.044604		0.0335	0.445738	0.464453		0.218221	0.157776
	0.0345	0.596197	0.414052	0.946946		0.044129	0.194524	0.044604		0.0345	0.445738	0.464453		0.218221	0.157776
	0.0355	0.596197	0.414052	0.946946		0.044129	0.194524	0.044604		0.0355	0.445738	0.464453		0.218221	0.157776
	0.0365	0.596197	0.414052	0.946946		0.044129	0.194524	0.044604		0.0365	0.445738	0.464453		0.218221	0.157776
	0.0375	0.596197	0.414052	0.946946		0.044129	0.194524	0.044604		0.0375	0.445738	0.464453		0.218221	0.157776
	0.0385	0.596197	0.414052	0.946946		0.044129	0.194524	0.044604		0.0385	0.445738	0.464453		0.218221	0.157776
	0.0395	0.596197	0.414052	0.946946		0.044129	0.194524	0.044604		0.0395	0.445738	0.464453		0.218221	0.157776
	0.0405	0.596197	0.414052	0.946946		0.044129	0.194524	0.044604		0.0405	0.445738	0.464453		0.218221	0.157776
	0.0415	0.596197	0.414052	0.946946		0.044129	0.194524	0.044604		0.0415	0.445738	0.464453		0.218221	0.157776
	0.0425	0.596197	0.414052	0.946946		0.044129	0.194524	0.044604		0.0425	0.445738	0.464453		0.218221	0.157776
	0.0435	0.596197	0.414052	0.946946		0.044129	0.194524	0.044604		0.0435	0.445738	0.464453		0.218221	0.157776
	0.0445	0.596197	0.414052	0.946946		0.044129	0.194524	0.044604		0.0445	0.445738	0.464453		0.218221	0.157776
	0.0455	0.596197	0.414052	0.946946		0.044129	0.194524	0.044604		0.0455	0.445738	0.464453		0.218221	0.157776
	0.0465	0.596197	0.414052	0.946946		0.044129	0.194524	0.044604		0.0465	0.445738	0.464453		0.218221	0.157776
	0.0475	0.596197	0.414052	0.946946		0.044129	0.194524	0.044604		0.0475	0.445738	0.464453		0.218221	0.157776
	0.0485	0.596197	0.414052	0.946946		0.044129	0.194524	0.044604		0.0485	0.445738	0.464453		0.218221	0.157776
	0.0495	0.596197	0.414052	0.946946		0.044129	0.194524	0.044604		0.0495	0.445738	0.464453		0.218221	0.157776
	0.0505	0.596197	0.414052	0.946946		0.044129	0.194524	0.044604		0.0505	0.445738	0.464453		0.218221	0.157776
	0.0515	0.596197	0.414052	0.946946		0.044129	0.194524	0.044604		0.0515	0.445738	0.464453		0.218221	0.157776
	0.0525	0.596197	0.414052	0.946946		0.044129	0.194524	0.044604		0.0525	0.445738	0.464453		0.218221	0.157776
	0.0535	0.596197	0.414052	0.946946		0.044129	0.194524	0.044604		0.0535	0.42814	0.464453		0.218221	0.157776
	0.0545	0.596197	0.414052	0.946946		0.044129	0.194524	0.044604		0.0545	0.42814	0.464453		0.218221	0.157776
	0.0555	0.596197	0.414052	0.946946		0.044129	0.194524	0.044604		0.0555	0.42814	0.464453		0.218221	0.157776
	0.0565	0.596197	0.414052	0.946946		0.044129	0.194524	0.044604		0.0565	0.42814	0.464453		0.218221	0.157776
	0.0575	0.596197	0.414052	0.946946		0.044129	0.194524	0.044604		0.0575	0.42814	0.464453		0.218221	0.157776
	0.0585	0.596197	0.414052	0.946946		0.044129	0.194524	0.044604		0.0585	0.42814	0.464453		0.218221	0.157776
	0.0595	0.596197	0.414052	0.946946		0.044129	0.194524	0.044604		0.0595	0.42814	0.464453		0.218221	0.157776
	0.0605	0.497628	0.414052	0.946946		0.044129	0.194524	0.044604		0.0605	0.42814	0.464453		0.218221	0.157776
	0.0615	0.497628	0.414052	0.946946		0.044129	0.194524	0.044604		0.0615	0.42814	0.464453		0.218221	0.157776
	0.0625	0.497628	0.414052	0.946946		0.044129	0.194524	0.044604		0.0625	0.42814	0.464453		0.218221	0.157776
	0.0635	0.497628	0.414052	0.946946		0.044129	0.194524	0.044604		0.0635	0.42814	0.464453		0.218221	0.157776
	0.0645	0.497628	0.414052	0.946946		0.044129	0.194524	0.044604		0.0645	0.42814	0.464453		0.218221	0.157776
	0.0655	0.497628	0.414052	0.946946		0.044129	0.194524	0.044604		0.0655	0.42814	0.464453		0.218221	0.157776
	0.0665	0.497628	0.414052	0.946946		0.044129	0.194524	0.044604		0.0665	0.42814	0.464453		0.218221	0.157776
	0.0675	0.497628	0.414052	0.946946		0.044129	0.194524	0.044604		0.0675	0.42814	0.464453		0.218221	0.157776
	0.0685	0.497628	0.414052	0.946946		0.044129	0.194524	0.044604		0.0685	0.42814	0.464453		0.218221	0.157776
	0.0695	0.497628	0.414052	0.946946		0.044129	0.194524	0.044604		0.0695	0.42814	0.464453		0.218221	0.157776
	0.0705	0.497628	0.414052	0.946946		0.044129	0.194524	0.044604		0.0705	0.42814	0.464453		0.218221	0.157776
	0.0715	0.497628	0.414052	0.946946		0.044129	0.194524	0.044604		0.0715	0.42814	0.464453		0.218221	0.157776
	0.0725	0.497628	0.414052	0.946946		0.044129	0.194524	0.044604		0.0725	0.42814	0.464453		0.218221	0.157776
	0.0735	0.497628	0.414052	0.946946		0.044129	0.194524	0.044604		0.0735	0.42814	0.464453		0.218221	0.157776
	0.0745	0.497628	0.414052	0.946946		0.044129	0.194524	0.044604		0.0745	0.42814	0.464453		0.218221	0.157776
	0.0755	0.497628	0.414052	0.946946		0.044129	0.194524	0.044604		0.0755	0.42814	0.464453		0.218221	0.157776
	0.0765	0.497628	0.414052	0.946946		0.044129	0.194524	0.044604		0.0765	0.42814	0.464453		0.218221	0.157776
	0.0775	0.497628	0.414052	0.946946		0.044129	0.194524	0.044604		0.0775	0.42814	0.464453		0.218221	0.157776
	0.0785	0.497628	0.414052	0.946946		0.044129	0.194524	0.044604		0.0785	0.42814	0.464453		0.218221	0.157776
	0.0795	0.497628	0.414052	0.946946		0.044129	0.194524	0.044604		0.0795	0.42814	0.464453		0.218221	0.157776
	0.0805	0.497628	0.414052	0.946946		0.044129	0.194524	0.044604		0.0805	0.42814	0.464453		0.218221	0.157776
	0.0815	0.497628	0.414052	0.946946		0.044129	0.194524	0.044604		0.0815	0.42814	0.464453		0.218221	0.157776
	0.0825	0.497628	0.414052	0.946946		0.044129	0.194524	0.044604		0.0825	0.42814	0.464453		0.218221	0.157776
	0.0835	0.497628	0.414052	0.946946		0.044129	0.194524	0.044604		0.0835	0.42814	0.464453		0.218221	0.157776
	0.0845	0.497628	0.414052	0.946946		0.044129	0.194524	0.044604		0.0845	0.42814	0.464453		0.218221	0.157776
	0.0855	0.497628	0.414052	0.960967		0.044129	0.194524	0.044604		0.0855	0.42814	0.464453		0.218221	0.157776
	0.0865	0.497628	0.414052	0.960967		0.044129	0.194524	0.044604		0.0865	0.42814	0.464453		0.218221	0.157776
	0.0875	0.497628	0.414052	0.960967		0.044129	0.194524	0.044604		0.0875	0.42814	0.464453		0.218221	0.157776
	0.0885	0.497628	0.414052	0.960967		0.044129	0.194524	0.044604		0.0885	0.42814	0.464453		0.218221	0.157776
	0.0895	0.497628	0.414052	0.960967		0.044129	0.194524	0.044604		0.0895	0.42814	0.464453		0.218221	0.157776
	0.0905	0.497628	0.414052	0.960967		0.044129	0.194524	0.044604		0.0905	0.42814	0.464453		0.218221	0.157776
	0.0915	0.497628	0.414052	0.960967		0.044129	0.194524	0.044604		0.0915	0.42814	0.464453		0.218221	0.157776
	0.0925	0.497628	0.414052	0.960967		0.044129	0.194524	0.044604		0.0925	0.42814	0.464453		0.218221	0.157776
	0.0935	0.497628	0.414052	0.947961		0.044129	0.194524	0.044604		0.0935	0.42814	0.464453		0.218221	0.157776
	0.0945	0.497628	0.414052	0.947961		0.044129	0.194524	0.044604		0.0945	0.42814	0.464453		0.218221	0.157776
	0.0955	0.497628	0.414052	0.947961		0.044129	0.194524	0.044604		0.0955	0.42814	0.464453		0.218221	0.157776
	0.0965	0.497628	0.414052	0.947961		0.044129	0.194524	0.044604		0.0965	0.42814	0.464453		0.218221	0.157776
	0.0975	0.497628	0.414052	0.947961		0.044129	0.194524	0.044604		0.0975	0.42814	0.464453		0.218221	0.157776
	0.0985	0.497628	0.414052	0.947961		0.044129	0.194524	0.044604		0.0985	0.42814	0.464453		0.218221	0.157776
	0.0995	0.497628	0.414052	0.947961		0.044129	0.194524	0.044604		0.0995	0.42814	0.464453		0.218221	0.157776
	0.1005	0.497628	0.414052	0.947961		0.044129	0.194524	0.044604		0.1005	0.42814	0.464453		0.218221	0.157776
	0.1015	0.497628	0.414052	0.947961		0.044129	0.194524	0.044604		0.1015	0.42814	0.464453		0.218221	0.157776
	0.1025	0.497628	0.414052	0.947961		0.044129	0.194524	0.044604		0.1025	0.42814	0.464453		0.218221	0.157776
	0.1035	0.497628	0.414052	0.947961		0.044129	0.194524	0.044604		0.1035	0.42814	0.464453		0.218221	0.157776
	0.1045	0.497628	0.414052	0.947961		0.044129	0.194524	0.044604		0.1045	0.42814	0.464453		0.218221	0.157776
	0.1055	0.497628	0.414052	0.947961		0.044129	0.194524	0.044604		0.1055	0.42814	0.464453		0.218221	0.157776
	0.1065	0.497628	0.414052	0.947961		0.044129	0.194524	0.044604		0.1065	0.42814	0.464453		0.218221	0.157776
	0.1075	0.497628	0.414052	0.947961		0.044129	0.194524	0.044604		0.1075	0.42814	0.464453		0.202493	0.157776
	0.1085	0.497628	0.414052	0.947961		0.044129	0.194524	0.044604		0.1085	0.42814	0.464453		0.202493	0.157776
	0.1095	0.497628	0.414052	0.947961		0.044129	0.194524	0.044604		0.1095	0.437405	0.464453		0.202493	0.157776
	0.1105	0.497628	0.414052	0.947961		0.044129	0.194524	0.044604		0.1105	0.437405	0.464453		0.202493	0.157776
	0.1115	0.497628	0.414052	0.959335		0.044129	0.194524	0.044604		0.1115	0.437405	0.464453		0.202493	0.157776
	0.1125	0.497628	0.414052	0.959335		0.044129	0.194524	0.044604		0.1125	0.437405	0.464453		0.202493	0.157776
	0.1135	0.497628	0.414052	0.959335		0.044129	0.194524	0.044604		0.1135	0.437405	0.464453		0.202493	0.157776
	0.1145	0.497628	0.414052	0.980839		0.044129	0.194524	0.044604		0.1145	0.437405	0.464453		0.202493	0.366321
	0.1155	0.497628	0.414052	0.980839		0.044129	0.194524	0.044604		0.1155	0.437405	0.464453		0.202493	0.366321
	0.1165	0.497628	0.414052	0.980839		0.044129	0.194524	0.044604		0.1165	0.437405	0.464453		0.202493	0.366321
	0.1175	0.497628	0.414052	0.980839		0.044129	0.194524	0.044604		0.1175	0.437405	0.464453		0.202493	0.366321
	0.1185	0.497628	0.414052	0.980839		0.044129	0.194524	0.044604		0.1185	0.437405	0.464453		0.202493	0.366321
	0.1195	0.497628	0.414052	0.980839		0.044129	0.194524	0.044604		0.1195	0.437405	0.464453		0.202493	0.366321
	0.1205	0.497628	0.414052	0.980839		0.044129	0.194524	0.044604		0.1205	0.437405	0.464453		0.202493	0.366321
	0.1215	0.497628	0.414052	0.980839		0.044129	0.194524	0.044604		0.1215	0.437405	0.464453		0.202493	0.366321
	0.1225	0.497628	0.414052	0.980839		0.044129	0.194524	0.044604		0.1225	0.437405	0.464453		0.202493	0.366321
	0.1235	0.497628	0.414052	0.980839		0.044129	0.194524	0.044604		0.1235	0.476829	0.464453		0.202493	0.366321
	0.1245	0.497628	0.414052	0.980839		0.044129	0.194524	0.044604		0.1245	0.476829	0.464453		0.202493	0.366321
	0.1255	0.497628	0.414052	0.980839		0.044129	0.194524	0.044604		0.1255	0.476829	0.464453		0.202493	0.366321
	0.1265	0.497628	0.414052	0.980839		0.044129	0.194524	0.044604		0.1265	0.476829	0.464453		0.202493	0.366321
	0.1275	0.497628	0.414052	0.980839		0.044129	0.194524	0.044604		0.1275	0.476829	0.464453		0.202493	0.366321
	0.1285	0.497628	0.414052	0.980839		0.044129	0.194524	0.044604		0.1285	0.476829	0.464453		0.202493	0.366321
	0.1295	0.497628	0.414052	0.980839		0.044129	0.194524	0.044604		0.1295	0.476829	0.464453		0.202493	0.366321
	0.1305	0.497628	0.414052	0.980839		0.044129	0.194524	0.044604		0.1305	0.476829	0.464453		0.202493	0.366321
	0.1315	0.497628	0.414052	0.980839		0.044129	0.194524	0.044604		0.1315	0.476829	0.464453		0.202493	0.366321
	0.1325	0.497628	0.414052	0.980324		0.044129	0.194524	0.044604		0.1325	0.534335	0.464453		0.202493	0.366321
	0.1335	0.497628	0.414052	0.980324		0.044129	0.194524	0.044604		0.1335	0.534335	0.464453		0.280995	0.366321
	0.1345	0.497628	0.414052	0.980324		0.044129	0.194524	0.044604		0.1345	0.534335	0.464453		0.280995	0.366321
	0.1355	0.497628	0.414052	0.980324		0.044129	0.194524	0.044604		0.1355	0.534335	0.464453		0.280995	0.366321
	0.1365	0.497628	0.414052	0.980324		0.044129	0.194524	0.044604		0.1365	0.534335	0.464453		0.280995	0.366321
	0.1375	0.497628	0.497777	0.980324		0.044129	0.194524	0.044604		0.1375	0.534335	0.464453		0.280995	0.366321
	0.1385	0.497628	0.497777	0.980324		0.044129	0.194524	0.044604		0.1385	0.534335	0.464453		0.280995	0.366321
	0.1395	0.497628	0.461726	0.980324		0.044129	0.194524	0.044604		0.1395	0.534335	0.464453		0.280995	0.366321
	0.1405	0.497628	0.461726	0.980324		0.044129	0.194524	0.044604		0.1405	0.534335	0.464453		0.280995	0.366321
	0.1415	0.497628	0.461726	0.980324		0.044129	0.194524	0.044604		0.1415	0.534335	0.464453		0.280995	0.366321
	0.1425	0.497628	0.461726	0.980324		0.044129	0.16988	0.044604		0.1425	0.534335	0.464453		0.280995	0.366321
	0.1435	0.497628	0.461726	0.980324		0.044129	0.16988	0.044604		0.1435	0.534335	0.464453		0.280995	0.366321
	0.1445	0.497628	0.461726	0.980324		0.044129	0.16988	0.044604		0.1445	0.534335	0.464453		0.280995	0.366321
	0.1455	0.497628	0.461726	0.980324		0.044129	0.16988	0.044604		0.1455	0.534335	0.464453		0.280995	0.366321
	0.1465	0.497628	0.461726	0.980324		0.044129	0.16988	0.044604		0.1465	0.534335	0.464453		0.280995	0.366321
	0.1475	0.497628	0.461726	0.980324		0.044129	0.16988	0.044604		0.1475	0.534335	0.464453		0.280995	0.366321
	0.1485	0.497628	0.461726	0.980324		0.044129	0.16988	0.044604		0.1485	0.534335	0.464453		0.280995	0.171027
	0.1495	0.497628	0.461726	0.980324		0.044129	0.16988	0.044604		0.1495	0.534335	0.464453		0.280995	0.171027
	0.1505	0.497628	0.461726	0.980324		0.044129	0.16988	0.044604		0.1505	0.534335	0.464453		0.280995	0.171027
	0.1515	0.497628	0.461726	0.980324		0.044129	0.16988	0.044604		0.1515	0.534335	0.464453		0.280995	0.171027
	0.1525	0.497628	0.461726	0.980324		0.044129	0.16988	0.044604		0.1525	0.534335	0.464453		0.280995	0.171027
	0.1535	0.497628	0.461726	0.980324		0.044129	0.16988	0.044604		0.1535	0.534335	0.464453		0.280995	0.171027
	0.1545	0.497628	0.461726	0.980324		0.044129	0.16988	0.044604		0.1545	0.534335	0.464453		0.280995	0.171027
	0.1555	0.497628	0.461726	0.980324		0.044129	0.16988	0.044604		0.1555	0.534335	0.464453		0.280995	0.171027
	0.1565	0.497628	0.461726	0.980324		0.044129	0.16988	0.044604		0.1565	0.534335	0.464453		0.280995	0.171027
	0.1575	0.497628	0.461726	0.980324		0.044129	0.16988	0.044604		0.1575	0.534335	0.464453		0.280995	0.171027
	0.1585	0.497628	0.461726	0.980324		0.044129	0.16988	0.044604		0.1585	0.534335	0.464453		0.280995	0.171027
	0.1595	0.497628	0.461726	0.980324		0.044129	0.16988	0.044604		0.1595	0.534335	0.464453		0.280995	0.171027
	0.1605	0.497628	0.461726	0.980324		0.044129	0.16988	0.044604		0.1605	0.534335	0.464453		0.280995	0.171027
	0.1615	0.497628	0.461726	0.980324		0.044129	0.16988	0.044604		0.1615	0.520792	0.464453		0.280995	0.171027
	0.1625	0.497628	0.461726	0.980324		0.044129	0.16988	0.044604		0.1625	0.520792	0.464453		0.280995	0.171027
	0.1635	0.497628	0.461726	0.980324		0.044129	0.16988	0.044604		0.1635	0.520792	0.464453		0.280995	0.171027
	0.1645	0.497628	0.461726	0.980324		0.044129	0.16988	0.044604		0.1645	0.520792	0.464453		0.280995	0.171027
	0.1655	0.497628	0.461726	0.980324		0.044129	0.16988	0.044604		0.1655	0.520792	0.464453		0.280995	0.171027
	0.1665	0.497628	0.461726	0.980324		0.044129	0.16988	0.044604		0.1665	0.520792	0.464453		0.280995	0.171027
	0.1675	0.497628	0.461726	0.980324		0.044129	0.16988	0.044604		0.1675	0.520792	0.464453		0.280995	0.171027
	0.1685	0.497628	0.461726	0.980324		0.044129	0.16988	0.044604		0.1685	0.520792	0.464453		0.280995	0.171027
	0.1695	0.497628	0.461726	0.980324		0.044129	0.16988	0.044604		0.1695	0.520792	0.464453		0.280995	0.171027
	0.1705	0.497628	0.461726	0.980324		0.044129	0.16988	0.044604		0.1705	0.520792	0.464453		0.280995	0.171027
	0.1715	0.497628	0.461726	0.980324		0.044129	0.16988	0.044604		0.1715	0.520792	0.449018		0.315128	0.171027
	0.1725	0.497628	0.461726	0.980324		0.044129	0.16988	0.044604		0.1725	0.520792	0.449018		0.315128	0.171027
	0.1735	0.497628	0.461726	0.974209		0.044129	0.16988	0.044604		0.1735	0.520792	0.449018		0.353577	0.171027
	0.1745	0.497628	0.461726	0.974209		0.044129	0.16988	0.044604		0.1745	0.520792	0.449018		0.353577	0.171027
	0.1755	0.497628	0.461726	0.974209		0.044129	0.16988	0.044604		0.1755	0.520792	0.449018		0.353577	0.171027
	0.1765	0.497628	0.461726	0.974209		0.044129	0.16988	0.044604		0.1765	0.520792	0.449018		0.353577	0.171027
	0.1775	0.497628	0.461726	0.974209		0.044129	0.16988	0.044604		0.1775	0.520792	0.449018		0.353577	0.171027
	0.1785	0.497628	0.461726	0.974209		0.044129	0.16988	0.044604		0.1785	0.520792	0.449018		0.353577	0.171027
	0.1795	0.497628	0.381193	0.974209		0.044129	0.16988	0.044604		0.1795	0.520792	0.449018		0.353577	0.171027
	0.1805	0.497628	0.381193	0.974209		0.044129	0.16988	0.044604		0.1805	0.520792	0.449018		0.353577	0.171027
	0.1815	0.497628	0.381193	0.974209		0.044129	0.16988	0.044604		0.1815	0.520792	0.449018		0.353577	0.171027
	0.1825	0.497628	0.381193	0.974209		0.044129	0.16988	0.044604		0.1825	0.520792	0.449018		0.353577	0.275433
	0.1835	0.497628	0.381193	0.974209		0.044129	0.16988	0.044604		0.1835	0.520792	0.449018		0.395898	0.275433
	0.1845	0.497628	0.381193	0.974209		0.044129	0.16988	0.044604		0.1845	0.520792	0.449018		0.395898	0.275433
	0.1855	0.497628	0.381193	0.974209		0.044129	0.16988	0.044604		0.1855	0.520792	0.449018		0.395898	0.275433
	0.1865	0.497628	0.381193	0.974209		0.044129	0.16988	0.044604		0.1865	0.520792	0.449018		0.395898	0.275433
	0.1875	0.497628	0.381193	0.974209		0.044129	0.16988	0.044604		0.1875	0.520792	0.449018		0.395898	0.275433
	0.1885	0.497628	0.381193	0.974209		0.044129	0.16988	0.044604		0.1885	0.520792	0.449018		0.563034	0.275433
	0.1895	0.497628	0.41238	1.00218		0.044129	0.16988	0.044604		0.1895	0.528753	0.449018		0.563034	0.275433
	0.1905	0.497628	0.41238	1.00218		0.044129	0.16988	0.044604		0.1905	0.528753	0.449018		0.563034	0.275433
	0.1915	0.497628	0.41238	0.986163		0.044129	0.16988	0.044604		0.1915	0.528753	0.449018		0.563034	0.275433
	0.1925	0.497628	0.41238	0.986163		0.044129	0.16988	0.044604		0.1925	0.528753	0.449018		0.563034	0.275433
	0.1935	0.497628	0.41238	0.986163		0.044129	0.16988	0.044604		0.1935	0.528753	0.449018		0.563034	0.275433
	0.1945	0.497628	0.499742	0.986163		0.044129	0.16988	0.044604		0.1945	0.528753	0.449018		0.563034	0.275433
	0.1955	0.497628	0.499742	0.986163		0.044129	0.16988	0.044604		0.1955	0.47202	0.449018		0.563034	0.275433
	0.1965	0.497628	0.499742	0.986163		0.044129	0.16988	0.044604		0.1965	0.47202	0.449018		0.563034	0.275433
	0.1975	0.497628	0.499742	0.986163		0.044129	0.16988	0.044604		0.1975	0.467461	0.449018		0.563034	0.275433
	0.1985	0.497628	0.499742	0.986163		0.044129	0.16988	0.044604		0.1985	0.467461	0.449018		0.563034	0.275433
	0.1995	0.497628	0.499742	0.986163		0.044129	0.16988	0.044604		0.1995	0.467461	0.449018		0.563034	0.275433
	0.2005	0.497628	0.499742	0.986163		0.044129	0.16988	0.044604		0.2005	0.467461	0.449018		0.563034	0.275433
	0.2015	0.497628	0.499742	0.986163		0.044129	0.16988	0.044604		0.2015	0.467461	0.449018		0.563034	0.275433
	0.2025	0.497628	0.499742	0.986163		0.044129	0.16988	0.044604		0.2025	0.467461	0.449018		0.563034	0.275433
	0.2035	0.497628	0.499742	0.986163		0.044129	0.16988	0.044604		0.2035	0.467461	0.449018		0.549744	0.275433
	0.2045	0.497628	0.499742	0.986163		0.044129	0.16988	0.044604		0.2045	0.467461	0.449018		0.549744	0.275433
	0.2055	0.497628	0.499742	0.986163		0.044129	0.16988	0.044604		0.2055	0.467461	0.449018		0.549744	0.275433
	0.2065	0.497628	0.499742	0.986163		0.044129	0.16988	0.044604		0.2065	0.467461	0.449018		0.549744	0.275433
	0.2075	0.497628	0.499742	0.986163		0.044129	0.16988	0.044604		0.2075	0.467461	0.449018		0.549744	0.275433
	0.2085	0.497628	0.499742	0.986163		0.044129	0.16988	0.044604		0.2085	0.467461	0.449018		0.549744	0.275433
	0.2095	0.497628	0.499742	0.986163		0.044129	0.16988	0.044604		0.2095	0.467461	0.449018		0.549744	0.275433
	0.2105	0.497628	0.499742	0.986163		0.044129	0.16988	0.044604		0.2105	0.508921	0.449018		0.549744	0.275433
	0.2115	0.497628	0.499742	1.02163		0.044129	0.16988	0.044604		0.2115	0.558016	0.449018		0.549744	0.275433
	0.2125	0.497628	0.577775	1.02163		0.044129	0.16988	0.044604		0.2125	0.558016	0.449018		0.549744	0.275433
	0.2135	0.497628	0.577775	1.02163		0.044129	0.16988	0.044604		0.2135	0.558016	0.449018		0.549744	0.275433
	0.2145	0.497628	0.577775	1.02163		0.044129	0.16988	0.044604		0.2145	0.558016	0.449018		0.549744	0.275433
	0.2155	0.497628	0.577775	1.02163		0.044129	0.16988	0.044604		0.2155	0.558016	0.449018		0.549744	0.275433
	0.2165	0.497628	0.577775	1.04309		0.044129	0.16988	0.044604		0.2165	0.558016	0.449018		0.549744	0.275433
	0.2175	0.497628	0.577775	1.04309		0.044129	0.16988	0.044604		0.2175	0.560612	0.449018		0.549744	0.275433
	0.2185	0.497628	0.577775	1.04309		0.044129	0.16988	0.044604		0.2185	0.560612	0.449018		0.420103	0.275433
	0.2195	0.497628	0.577775	1.04309		0.044129	0.16988	0.044604		0.2195	0.560612	0.449018		0.420103	0.275433
	0.2205	0.497628	0.577775	1.04309		0.044129	0.16988	0.044604		0.2205	0.560612	0.449018		0.286035	0.275433
	0.2215	0.497628	0.657905	1.06123		0.044129	0.16988	0.044604		0.2215	0.560612	0.449018		0.286035	0.275433
	0.2225	0.497628	0.657905	1.06123		0.044129	0.16988	0.044604		0.2225	0.560612	0.449018		0.311051	0.275433
	0.2235	0.497628	0.657905	1.06123		0.044129	0.16988	0.044604		0.2235	0.560612	0.449018		0.311051	0.275433
	0.2245	0.497628	0.657905	1.06123		0.044129	0.16988	0.044604		0.2245	0.560612	0.449018		0.311051	0.275433
	0.2255	0.497628	0.657905	1.06123		0.044129	0.16988	0.044604		0.2255	0.560612	0.449018		0.311051	0.275433
	0.2265	0.497628	0.657905	1.06123		0.044129	0.16988	0.044604		0.2265	0.560612	0.449018		0.311051	0.275433
	0.2275	0.497628	0.657905	1.08979		0.044129	0.16988	0.044604		0.2275	0.71534	0.449018		0.311051	0.275433
	0.2285	0.497628	0.657905	1.08979		0.044129	0.16988	0.044604		0.2285	0.71534	0.449018		0.311051	0.275433
	0.2295	0.497628	0.657905	1.13379		0.044129	0.16988	0.044604		0.2295	0.71534	0.449018		0.311051	0.275433
	0.2305	0.497628	0.657905	1.13379		0.044129	0.16988	0.044604		0.2305	0.71534	0.449018		0.311051	0.275433
	0.2315	0.497628	0.657905	1.13379		0.044129	0.16988	0.044604		0.2315	0.71534	0.449018		0.311051	0.275433
	0.2325	0.497628	0.657905	1.13379		0.044129	0.16988	0.044604		0.2325	0.71534	0.449018		0.311051	0.275433
	0.2335	0.497628	0.657905	1.13379		0.044129	0.16988	0.044604		0.2335	0.71534	0.449018		0.311051	0.275433
	0.2345	0.497628	0.657905	1.13379		0.044129	0.16988	0.044604		0.2345	0.71534	0.449018		0.311051	0.275433
	0.2355	0.497628	0.657905	1.13379		0.044129	0.16988	0.044604		0.2355	0.71534	0.449018		0.311051	0.275433
	0.2365	0.497628	0.657905	1.13379		0.044129	0.16988	0.044604		0.2365	0.71534	0.449018		0.311051	0.275433
	0.2375	0.469177	0.657905	1.13379		0.044129	0.16988	0.044604		0.2375	0.71534	0.449018		0.311051	0.275433
	0.2385	0.469177	0.657905	1.13379		0.044129	0.16988	0.044604		0.2385	0.71534	0.449018		0.311051	0.275433
	0.2395	0.469177	0.657905	1.13379		0.044129	0.16988	0.044604		0.2395	0.71534	0.449018		0.311051	0.275433
	0.2405	0.469177	0.657905	1.13379		0.044129	0.16988	0.044604		0.2405	0.71534	0.449018		0.311051	0.275433
	0.2415	0.469177	0.657905	1.13379		0.044129	0.16988	0.044604		0.2415	0.71534	0.449018		0.311051	0.275433
	0.2425	0.469177	0.657905	1.14958		0.044129	0.16988	0.044604		0.2425	0.71534	0.449018		0.311051	0.275433
	0.2435	0.469177	0.657905	1.14958		0.044129	0.16988	0.044604		0.2435	0.71534	0.449018		0.311051	0.275433
	0.2445	0.469177	0.657905	1.14958		0.044129	0.16988	0.044604		0.2445	0.71534	0.449018		0.311051	0.275433
	0.2455	0.469177	0.657905	1.14958		0.044129	0.16988	0.044604		0.2455	0.71534	0.449018		0.311051	0.275433
	0.2465	0.469177	0.657905	1.14958		0.044129	0.16988	0.044604		0.2465	0.71534	0.446981		0.311051	0.275433
	0.2475	0.469177	0.657905	1.14958		0.044129	0.16988	0.044604		0.2475	0.652647	0.446981		0.311051	0.275433
	0.2485	0.469177	0.590268	1.14958		0.044129	0.16988	0.044604		0.2485	0.652647	0.446981		0.311051	0.275433
	0.2495	0.469177	0.579716	1.14958		0.044129	0.16988	0.044604		0.2495	0.652647	0.446981		0.311051	0.275433
	0.2505	0.469177	0.579716	1.14958		0.044129	0.16988	0.044604		0.2505	0.652647	0.446981		0.311051	0.394447
	0.2515	0.469177	0.579716	1.14958		0.044129	0.16988	0.044604		0.2515	0.652647	0.446981		0.311051	0.394447
	0.2525	0.469177	0.579716	1.14958		0.044129	0.16988	0.044604		0.2525	0.652647	0.446981		0.311051	0.394447
	0.2535	0.469177	0.579716	1.14958		0.044129	0.16988	0.044604		0.2535	0.652647	0.446981		0.311051	0.394447
	0.2545	0.469177	0.579716	1.14958		0.044129	0.16988	0.044604		0.2545	0.652647	0.446981		0.311051	0.394447
	0.2555	0.469177	0.579716	1.14958		0.044129	0.16988	0.044604		0.2555	0.652647	0.446981		0.311051	0.394447
	0.2565	0.469177	0.579716	1.14958		0.044129	0.16988	0.044604		0.2565	0.652647	0.446981		0.311051	0.394447
	0.2575	0.469177	0.579716	1.14958		0.044129	0.16988	0.044604		0.2575	0.652647	0.446981		0.340069	0.292838
	0.2585	0.469177	0.579716	1.14958		0.044129	0.16988	0.044604		0.2585	0.613627	0.446981		0.340069	0.292838
	0.2595	0.469177	0.579716	1.14958		0.044129	0.16988	0.044604		0.2595	0.613627	0.446981		0.340069	0.292838
	0.2605	0.469177	0.579716	1.14958		0.044129	0.16988	0.044604		0.2605	0.613627	0.446981		0.340069	0.292838
	0.2615	0.469177	0.631796	1.14958		0.044129	0.16988	0.044604		0.2615	0.613627	0.446981		0.340069	0.292838
	0.2625	0.469177	0.841779	1.14958		0.044129	0.16988	0.044604		0.2625	0.613627	0.446981		0.340069	0.292838
	0.2635	0.469177	0.841779	1.14958		0.044129	0.16988	0.044604		0.2635	0.613627	0.446981		0.340069	0.292838
	0.2645	0.469177	0.841779	1.18101		0.044129	0.16988	0.044604		0.2645	0.613627	0.446981		0.340069	0.292838
	0.2655	0.469177	0.841779	1.18101		0.044129	0.16988	0.044604		0.2655	0.613627	0.446981		0.340069	0.292838
	0.2665	0.469177	0.841779	1.18101		0.044129	0.16988	0.044604		0.2665	0.613627	0.446981		0.340069	0.292838
	0.2675	0.469177	0.841779	1.21091		0.044129	0.16988	0.044604		0.2675	0.613627	0.446981		0.340069	0.292838
	0.2685	0.469177	0.841779	1.21091		0.044129	0.16988	0.044604		0.2685	0.613627	0.446981		0.340069	0.292838
	0.2695	0.469177	0.841779	1.21091		0.044129	0.16988	0.044604		0.2695	0.613627	0.446981		0.340069	0.292838
	0.2705	0.469177	0.841779	1.21091		0.044129	0.16988	0.044604		0.2705	0.613627	0.446981		0.340069	0.292838
	0.2715	0.469177	0.841779	1.21091		0.044129	0.16988	0.044604		0.2715	0.613627	0.446981		0.457313	0.292838
	0.2725	0.469177	0.841779	1.21091		0.044129	0.16988	0.044604		0.2725	0.613627	0.446981		0.457313	0.292838
	0.2735	0.469177	0.841779	1.21091		0.044129	0.16988	0.044604		0.2735	0.613627	0.446981		0.457313	0.292838
	0.2745	0.469177	0.841779	1.21091		0.044129	0.16988	0.044604		0.2745	0.613627	0.446981		0.457313	0.292838
	0.2755	0.469177	0.841779	1.21091		0.044129	0.16988	0.044604		0.2755	0.613627	0.451436		0.457313	0.292838
	0.2765	0.469177	0.841705	1.21091		0.044129	0.16988	0.044604		0.2765	0.613627	0.451436		0.457313	0.292838
	0.2775	0.469177	0.841705	1.21091		0.044129	0.16988	0.044604		0.2775	0.810055	0.451436		0.457313	0.292838
	0.2785	0.469177	0.841705	1.24375		0.044129	0.16988	0.044604		0.2785	0.810055	0.451436		0.457313	0.292838
	0.2795	0.469177	0.841705	1.24375		0.044129	0.16988	0.044604		0.2795	0.784519	0.451436		0.457313	0.292838
	0.2805	0.469177	0.841705	1.24375		0.044129	0.16988	0.044604		0.2805	0.784519	0.451436		0.457313	0.292838
	0.2815	0.469177	0.841051	1.24375		0.044129	0.16988	0.044604		0.2815	0.784519	0.451436		0.457313	0.292838
	0.2825	0.469177	0.841051	1.24375		0.044129	0.16988	0.044604		0.2825	0.784519	0.451436		0.457313	0.292838
	0.2835	0.469177	0.841051	1.24375		0.044129	0.16988	0.044604		0.2835	0.784519	0.451436		0.457313	0.292838
	0.2845	0.469177	0.841051	1.24375		0.044129	0.16988	0.044604		0.2845	0.784519	0.451436		0.457313	0.292838
	0.2855	0.469177	0.841051	1.24375		0.044129	0.16988	0.044604		0.2855	0.784519	0.451436		0.457313	0.292838
	0.2865	0.469177	0.841051	1.24375		0.044129	0.16988	0.044604		0.2865	0.784519	0.451436		0.457313	0.292838
	0.2875	0.469177	0.841051	1.26543		0.044129	0.16988	0.044604		0.2875	0.784519	0.451436		0.457313	0.292838
	0.2885	0.469177	0.841051	1.26543		0.044129	0.16988	0.044604		0.2885	0.784519	0.451436		0.457313	0.292838
	0.2895	0.469177	0.841051	1.26543		0.044129	0.16988	0.044604		0.2895	0.784519	0.451436		0.457313	0.292838
	0.2905	0.488625	0.840261	1.26543		0.044129	0.16988	0.044604		0.2905	0.784519	0.451436		0.457313	0.292838
	0.2915	0.488625	0.840261	1.26543		0.044129	0.16988	0.044604		0.2915	0.929235	0.451436		0.457313	0.292838
	0.2925	0.488625	0.840261	1.26543		0.044129	0.16988	0.044604		0.2925	0.929235	0.523967		0.457313	0.292838
	0.2935	0.488625	0.840261	1.26543		0.044129	0.16988	0.044604		0.2935	0.929235	0.523967		0.457313	0.292838
	0.2945	0.488625	0.77868	1.28069		0.044129	0.16988	0.044604		0.2945	0.929235	0.523967		0.457313	0.292838
	0.2955	0.488625	0.77868	1.28069		0.044129	0.16988	0.044604		0.2955	0.929235	0.523967		0.457313	0.292838
	0.2965	0.488625	0.77868	1.28069		0.044129	0.16988	0.044604		0.2965	0.929235	0.523967		0.457313	0.407411
	0.2975	0.488625	0.77868	1.28069		0.044129	0.16988	0.044604		0.2975	0.929235	0.546716		0.457313	0.407411
	0.2985	0.488625	0.77868	1.28069		0.044129	0.16988	0.044604		0.2985	0.929235	0.546716		0.457313	0.407411
	0.2995	0.488625	0.935537	1.22853		0.044129	0.16988	0.044604		0.2995	0.929235	0.546716		0.457313	0.407411
	0.3005	0.488625	0.935537	1.22853		0.044129	0.16988	0.044604		0.3005	0.929235	0.546716		0.457313	0.407411
	0.3015	0.491088	0.935537	1.22853		0.044129	0.16988	0.044604		0.3015	0.750718	0.546716		0.457313	0.407411
	0.3025	0.491088	0.935537	1.22853		0.044129	0.16988	0.044604		0.3025	0.750718	0.546716		0.306028	0.407411
	0.3035	0.491088	0.935537	1.22853		0.044129	0.16988	0.044604		0.3035	0.750718	0.546716		0.306028	0.407411
	0.3045	0.491088	0.935537	1.22853		0.044129	0.16988	0.044604		0.3045	0.750718	0.546716		0.306028	0.407411
	0.3055	0.491088	1.0488	1.22853		0.044129	0.16988	0.044604		0.3055	0.750718	0.546716		0.306028	0.407411
	0.3065	0.491088	1.0488	1.17864		0.044129	0.16988	0.044604		0.3065	0.750718	0.546716		0.306028	0.407411
	0.3075	0.491088	1.0488	1.17864		0.044129	0.16988	0.044604		0.3075	0.746986	0.546716		0.306028	0.407411
	0.3085	0.491088	1.0488	1.17864		0.044129	0.16988	0.044604		0.3085	0.774275	0.546716		0.288396	0.407411
	0.3095	0.491088	1.0488	1.20464		0.044129	0.16988	0.044604		0.3095	0.774275	0.546716		0.288396	0.407411
	0.3105	0.491088	1.34211	1.20464		0.044129	0.16988	0.044604		0.3105	0.774275	0.546716		0.288396	0.407411
	0.3115	0.491088	1.34211	1.20464		0.044129	0.16988	0.044604		0.3115	0.774275	0.546716		0.288396	0.407411
	0.3125	0.491088	1.34211	1.20464		0.044129	0.16988	0.044604		0.3125	0.774275	0.546716		0.288396	0.407411
	0.3135	0.491088	1.3431	1.20464		0.044129	0.16988	0.044604		0.3135	0.774275	0.546716		0.24773	0.407411
	0.3145	0.495582	1.3431	1.20464		0.044129	0.16988	0.044604		0.3145	0.601207	0.546716		0.24773	0.407411
	0.3155	0.495582	1.3431	1.20464		0.044129	0.16988	0.044604		0.3155	0.601207	0.557782		0.24773	0.407411
	0.3165	0.495582	1.3431	1.20464		0.044129	0.16988	0.044604		0.3165	0.601207	0.557782		0.24773	0.407411
	0.3175	0.495582	0.693002	1.20464		0.044129	0.16988	0.044604		0.3175	0.601207	0.557782		0.24773	0.407411
	0.3185	0.495582	0.809332	1.20464		0.044129	0.16988	0.044604		0.3185	0.601207	0.557782		0.24773	0.407411
	0.3195	0.495582	1.5003	1.22081		0.044129	0.16988	0.044604		0.3195	0.601207	0.557782		0.24773	0.407411
	0.3205	0.495582	1.5003	1.22081		0.044129	0.16988	0.044604		0.3205	0.601207	0.557782		0.24773	0.407411
	0.3215	0.495582	1.5003	1.21632		0.044129	0.16988	0.044604		0.3215	0.601207	0.557782		0.24773	0.407411
	0.3225	0.495582	1.5003	1.21632		0.044129	0.16988	0.044604		0.3225	0.647895	0.557782		0.24773	0.407411
	0.3235	0.495582	1.5003	1.21632		0.044129	0.16988	0.044604		0.3235	0.647895	0.557782		0.24773	0.407411
	0.3245	0.495582	0.775127	1.20732		0.044129	0.16988	0.044604		0.3245	0.688946	0.557782		0.24773	0.407411
	0.3255	0.495582	0.775127	1.20732		0.044129	0.16988	0.044604		0.3255	0.688946	0.557782		0.24773	0.407411
	0.3265	0.495582	0.775127	1.20732		0.044129	0.16988	0.044604		0.3265	0.688946	0.557782		0.24773	0.653361
	0.3275	0.495582	0.775127	1.20732		0.044129	0.16988	0.044604		0.3275	0.688946	0.557782		0.24773	0.653361
	0.3285	0.495582	0.775127	1.19374		0.044129	0.16988	0.044604		0.3285	0.688946	0.557782		0.24773	0.653361
	0.3295	0.486222	0.775127	1.19374		0.044129	0.16988	0.044604		0.3295	0.688946	0.557782		0.24773	0.653361
	0.3305	0.486222	0.775127	1.25843		0.044129	0.16988	0.044604		0.3305	0.688946	0.557782		0.24773	0.653361
	0.3315	0.486222	0.775127	1.25843		0.044129	0.16988	0.044604		0.3315	0.688946	0.557782		0.24773	0.653361
	0.3325	0.486222	0.775127	1.25843		0.044129	0.16988	0.044604		0.3325	0.688946	0.557782		0.24773	0.653361
	0.3335	0.486222	0.775127	1.25843		0.044129	0.16988	0.044604		0.3335	0.688946	0.557782		0.24773	0.653361
	0.3345	0.486222	0.775127	1.25843		0.044129	0.16988	0.044604		0.3345	0.688946	0.557782		0.24773	0.653361
	0.3355	0.486222	0.775127	1.25843		0.044129	0.16988	0.044604		0.3355	0.688946	0.557782		0.24773	0.653361
	0.3365	0.486222	0.775127	1.25843		0.044129	0.16988	0.044604		0.3365	0.688946	0.557782		0.24773	0.653361
	0.3375	0.486222	0.775127	1.25843		0.044129	0.16988	0.044604		0.3375	0.688946	0.557782		0.24773	0.653361
	0.3385	0.486222	0.775127	1.25843		0.044129	0.16988	0.044604		0.3385	0.688946	0.557782		0.24773	0.653361
	0.3395	0.486222	0.775127	1.25843		0.044129	0.16988	0.044604		0.3395	0.736131	0.557782		0.24773	0.653361
	0.3405	0.486222	0.775127	1.25843		0.044129	0.16988	0.044604		0.3405	0.736131	0.557782		0.24773	0.653361
	0.3415	0.486222	0.775127	1.25843		0.044129	0.16988	0.044604		0.3415	0.748703	0.557782		0.24773	0.653361
	0.3425	0.486222	0.775127	1.25843		0.044129	0.16988	0.044604		0.3425	0.748703	0.557782		0.24773	0.653361
	0.3435	0.486222	0.923717	1.25843		0.044129	0.16988	0.044604		0.3435	0.748703	0.557782		0.24773	0.383
	0.3445	0.486222	0.923717	1.25843		0.044129	0.16988	0.044604		0.3445	0.748703	0.557782		0.24773	0.383
	0.3455	0.486222	1.7666	1.25843		0.044129	0.16988	0.044604		0.3455	0.748703	0.557782		0.24773	0.383
	0.3465	0.486222	1.7666	1.25843		0.044129	0.16988	0.044604		0.3465	0.748703	0.557782		0.24773	0.383
	0.3475	0.486222	1.7666	1.25843		0.044129	0.16988	0.044604		0.3475	0.748703	0.557782		0.24773	0.383
	0.3485	0.486222	1.7666	1.25843		0.044129	0.16988	0.044604		0.3485	0.748703	0.557782		0.24773	0.383
	0.3495	0.516035	1.7666	1.25843		0.044129	0.16988	0.044604		0.3495	0.671285	0.557782		0.24773	0.383
	0.3505	0.516035	1.7666	1.25843		0.044129	0.16988	0.044604		0.3505	0.671285	0.557782		0.24773	0.383
	0.3515	0.516035	1.7666	1.25843		0.044129	0.16988	0.044604		0.3515	0.671285	0.557782		0.24773	0.383
	0.3525	0.516035	1.74273	1.25843		0.044129	0.16988	0.044604		0.3525	0.702788	0.557782		0.24773	0.383
	0.3535	0.516035	1.79796	1.25843		0.044129	0.16988	0.044604		0.3535	0.702788	0.557782		0.24773	0.383
	0.3545	0.516035	1.79796	1.29107		0.044129	0.16988	0.044604		0.3545	0.702788	0.557782		0.24773	0.383
	0.3555	0.593614	1.79796	1.29107		0.044129	0.16988	0.044604		0.3555	0.702788	0.557782		0.24773	0.383
	0.3565	0.593614	1.79796	1.29107		0.044129	0.16988	0.044604		0.3565	0.702788	0.557782		0.24773	0.383
	0.3575	0.593614	1.79796	1.29107		0.044129	0.16988	0.044604		0.3575	0.702788	0.557782		0.24773	0.383
	0.3585	0.593614	1.79796	1.29107		0.044129	0.16988	0.044604		0.3585	0.702788	0.557782		0.269608	0.383
	0.3595	0.593614	2.27123	1.29107		0.044129	0.16988	0.044604		0.3595	0.702788	0.557782		0.269608	0.383
	0.3605	0.593614	2.27123	1.29107		0.044129	0.16988	0.044604		0.3605	0.702788	0.557782		0.269608	0.383
	0.3615	0.593614	2.27123	1.29107		0.044129	0.16988	0.044604		0.3615	0.702788	0.557782		0.269608	0.383
	0.3625	0.593614	1.54561	1.29107		0.044129	0.16988	0.044604		0.3625	0.702788	0.557782		0.269608	0.383
	0.3635	0.594143	1.54561	1.29107		0.044129	0.16988	0.044604		0.3635	0.702788	0.557782		0.269608	0.383
	0.3645	0.594143	1.6854	1.29107		0.044129	0.16988	0.044604		0.3645	0.702788	0.557782		0.269608	0.383
	0.3655	0.594143	1.64358	1.29107		0.044129	0.16988	0.044604		0.3655	0.702788	0.557782		0.385986	0.383
	0.3665	0.594143	1.64358	1.29107		0.044129	0.16988	0.044604		0.3665	0.702788	0.557782		0.385986	0.383
	0.3675	0.594143	1.64358	1.29107		0.044129	0.16988	0.044604		0.3675	0.702788	0.557782		0.385986	0.383
	0.3685	0.594143	1.99781	1.29107		0.044129	0.16988	0.044604		0.3685	0.702788	0.573769		0.385986	0.383
	0.3695	0.594143	1.99781	1.30227		0.044129	0.16988	0.044604		0.3695	0.899663	0.573769		0.385986	0.383
	0.3705	0.594143	2.66431	1.30227		0.044129	0.16988	0.044604		0.3705	0.899663	0.573769		0.385986	0.383
	0.3715	0.594143	2.66431	1.30227		0.044129	0.16988	0.044604		0.3715	0.899663	0.529597		0.385986	0.383
	0.3725	0.594143	2.66431	1.30227		0.044129	0.16988	0.044604		0.3725	0.899663	0.529597		0.385986	0.383
	0.3735	0.594143	2.66431	1.30227		0.044129	0.16988	0.044604		0.3735	0.886877	0.529597		0.385986	0.383
	0.3745	0.611403	2.06241	1.30227		0.044129	0.16988	0.044604		0.3745	0.886877	0.538161		0.385986	0.383
	0.3755	0.611403	2.06241	1.30227		0.044129	0.16988	0.044604		0.3755	0.886877	0.538161		0.385986	1.00722
	0.3765	0.611403	2.06241	1.30227		0.044129	0.16988	0.044604		0.3765	0.886877	0.538161		0.385986	1.00722
	0.3775	0.611403	2.06241	1.24749		0.044129	0.16988	0.044604		0.3775	0.886877	0.538161		0.385986	1.00722
	0.3785	0.611403	1.4975	1.24749		0.044129	0.16988	0.044604		0.3785	0.886877	0.538161		0.385986	1.00722
	0.3795	0.611403	1.4975	1.24749		0.044129	0.16988	0.044604		0.3795	0.886877	0.538161		0.385986	1.00722
	0.3805	0.611403	1.4975	1.24749		0.044129	0.16988	0.044604		0.3805	0.886877	0.538161		0.385986	1.00722
	0.3815	0.611403	1.49772	1.24749		0.044129	0.16988	0.044604		0.3815	0.886877	0.538161		0.385986	1.00722
	0.3825	0.611403	1.49772	1.24749		0.044129	0.16988	0.044604		0.3825	0.909927	0.538161		0.385986	1.00722
	0.3835	0.611403	1.49772	1.24749		0.044129	0.16988	0.044604		0.3835	0.909927	0.538161		0.385986	1.00722
	0.3845	0.663743	1.49772	1.24749		0.044129	0.16988	0.044604		0.3845	0.909927	0.538161		0.385986	1.00722
	0.3855	0.663743	1.49772	1.24749		0.044129	0.16988	0.044604		0.3855	0.909927	0.538161		0.385986	1.00722
	0.3865	0.663743	1.49772	1.24749		0.044129	0.16988	0.044604		0.3865	0.909927	0.692008		0.385986	0.538001
	0.3875	0.663743	1.49772	1.24749		0.044129	0.16988	0.044604		0.3875	0.909927	0.692008		0.385986	0.538001
	0.3885	0.663743	0.771097	1.24749		0.044129	0.16988	0.044604		0.3885	0.909927	0.692008		0.385986	0.538001
	0.3895	0.663743	0.771097	1.24749		0.044129	0.16988	0.044604		0.3895	0.909927	0.692008		0.357001	0.538001
	0.3905	0.652282	0.771097	1.24749		0.044129	0.16988	0.044604		0.3905	0.909927	0.692008		0.357001	0.538001
	0.3915	0.652282	0.771097	1.2301		0.044129	0.16988	0.044604		0.3915	0.909927	0.692008		0.357001	0.538001
	0.3925	0.652282	0.771097	1.2301		0.044129	0.16988	0.044604		0.3925	0.909927	0.692008		0.357001	0.538001
	0.3935	0.652282	0.771097	1.2301		0.044129	0.16988	0.044604		0.3935	0.909927	0.692008		0.357001	0.538001
	0.3945	0.652282	0.771097	1.2301		0.044129	0.16988	0.044604		0.3945	0.909927	0.692008		0.357001	0.538001
	0.3955	0.652282	0.771097	1.2301		0.044129	0.16988	0.044604		0.3955	0.909927	0.692008		0.357001	0.538001
	0.3965	0.652282	0.771097	1.2301		0.044129	0.16988	0.044604		0.3965	0.909927	0.692008		0.357001	0.538001
	0.3975	0.652282	0.771097	1.2301		0.044129	0.16988	0.044604		0.3975	0.909927	0.692008		0.357001	0.538001
	0.3985	0.652282	0.771097	1.2301		0.044129	0.16988	0.044604		0.3985	0.909927	0.692008		0.357001	0.538001
	0.3995	0.652282	0.771097	1.2301		0.044129	0.16988	0.044604		0.3995	0.909927	0.692008		0.333585	0.538001
	0.4005	0.652282	0.771097	1.2301		0.044129	0.16988	0.044604		0.4005	0.723771	0.692008		0.333585	0.538001
	0.4015	0.652282	0.771097	1.2301		0.044129	0.166948	0.044604		0.4015	0.723771	0.692008		0.333585	0.538001
	0.4025	0.652282	0.771097	1.2301		0.044129	0.166948	0.044604		0.4025	0.723771	0.692008		0.333585	0.538001
	0.4035	0.652282	0.676221	1.2301		0.044129	0.166948	0.044604		0.4035	0.723771	0.692008		0.333585	0.538001
	0.4045	0.652282	0.676221	1.2301		0.044129	0.166948	0.044604		0.4045	0.679476	0.692008		0.333585	0.538001
	0.4055	0.652282	0.629404	1.2301		0.044129	0.166948	0.044604		0.4055	0.679476	0.692008		0.333585	0.538001
	0.4065	0.652282	0.629404	1.2301		0.044129	0.166948	0.044604		0.4065	0.679476	0.692008		0.333585	0.538001
	0.4075	0.652282	0.629404	1.2301		0.044129	0.166948	0.044604		0.4075	0.679476	0.692008		0.333585	0.538001
	0.4085	0.652282	0.629404	1.2301		0.044129	0.166948	0.044604		0.4085	0.679476	0.731288		0.333585	0.258965
	0.4095	0.652282	0.629404	1.2301		0.044129	0.166948	0.044604		0.4095	0.679476	0.731288		0.333585	0.258965
	0.4105	0.652282	0.629404	1.2301		0.044129	0.166948	0.044604		0.4105	0.679476	0.731288		0.333585	0.258965
	0.4115	0.652282	0.6285	1.2301		0.044129	0.166948	0.044604		0.4115	0.679476	0.731288		0.333585	0.258965
	0.4125	0.652282	0.6285	1.2301		0.044129	0.166948	0.044604		0.4125	0.723601	0.731288		0.333585	0.258965
	0.4135	0.652282	0.6285	1.2301		0.044129	0.166948	0.044604		0.4135	0.717903	0.731288		0.333585	0.258965
	0.4145	0.652282	0.6285	1.2301		0.044129	0.166948	0.044604		0.4145	0.717903	0.731288		0.333585	0.258965
	0.4155	0.652282	0.6285	1.2301		0.044129	0.166948	0.044604		0.4155	0.717903	0.728837		0.333585	0.258965
	0.4165	0.652282	0.6285	1.2301		0.044129	0.166948	0.044604		0.4165	0.631085	0.728837		0.333585	0.258965
	0.4175	0.652282	0.6285	1.2301		0.044129	0.166948	0.044604		0.4175	0.631085	0.728837		0.333585	0.258965
	0.4185	0.652282	0.6285	1.2301		0.044129	0.166948	0.044604		0.4185	0.631085	0.728837		0.333585	0.258965
	0.4195	0.652282	0.6285	1.19007		0.044129	0.166948	0.044604		0.4195	0.822212	0.728837		0.380137	0.258965
	0.4205	0.652282	0.6285	1.19007		0.044129	0.166948	0.044604		0.4205	0.822212	0.728837		0.380137	0.258965
	0.4215	0.652282	0.6285	1.19007		0.044129	0.166948	0.044604		0.4215	0.822212	0.728837		0.380137	0.258965
	0.4225	0.652282	0.6285	1.19007		0.044129	0.166948	0.044604		0.4225	0.822212	0.728837		0.380137	0.258965
	0.4235	0.652282	0.6285	1.19007		0.044129	0.166948	0.044604		0.4235	0.822212	0.728837		0.380137	0.258965
	0.4245	0.652282	0.6285	1.19007		0.044129	0.166948	0.044604		0.4245	0.822212	0.579102		0.380137	0.258965
	0.4255	0.652282	0.6285	1.19007		0.044129	0.166948	0.044604		0.4255	0.822212	0.579102		0.380137	0.258965
	0.4265	0.684783	0.6285	1.19007		0.044129	0.166948	0.044604		0.4265	0.822212	0.579102		0.380137	0.258965
	0.4275	0.684783	0.6285	1.19007		0.044129	0.166948	0.044604		0.4275	0.822212	0.579102		0.380137	0.258965
	0.4285	0.684783	0.6285	1.19007		0.044129	0.166948	0.044604		0.4285	0.822212	0.579102		0.380137	0.258965
	0.4295	0.684783	0.6285	1.19007		0.044129	0.166948	0.044604		0.4295	0.822212	0.579102		0.380137	0.258965
	0.4305	0.684783	0.6285	1.19007		0.044129	0.166948	0.044604		0.4305	0.822212	0.579102		0.380137	0.258965
	0.4315	0.684783	0.6285	1.19007		0.044129	0.166948	0.044604		0.4315	0.822212	0.579102		0.380137	0.258965
	0.4325	0.684783	0.6285	1.19007		0.044129	0.166948	0.044604		0.4325	0.822212	0.579102		0.380137	0.258965
	0.4335	0.684783	0.6285	1.19007		0.044129	0.166948	0.044604		0.4335	0.822212	0.579102		0.380137	0.258965
	0.4345	0.684783	0.6285	1.19007		0.044129	0.166948	0.044604		0.4345	0.822212	0.579102		0.380137	0.258965
	0.4355	0.684783	0.6285	1.19007		0.044129	0.166948	0.044604		0.4355	0.822212	0.579102		0.380137	0.7824
	0.4365	0.684783	0.6285	1.19007		0.044129	0.166948	0.044604		0.4365	0.822212	0.579102		0.380137	0.7824
	0.4375	0.684783	0.6285	1.20301		0.044129	0.166948	0.044604		0.4375	0.822212	0.579102		0.380137	0.7824
	0.4385	0.684783	0.6285	1.20301		0.044129	0.166948	0.044604		0.4385	0.89579	0.579102		0.380137	0.7824
	0.4395	0.684783	0.687496	1.20301		0.044129	0.166948	0.044604		0.4395	0.89579	0.579102		0.380137	0.7824
	0.4405	0.684783	0.687496	1.15719		0.044129	0.166948	0.044604		0.4405	0.89579	0.579102		0.380137	0.7824
	0.4415	0.684783	0.658345	1.16101		0.044129	0.166948	0.044604		0.4415	0.89579	0.594042		0.277394	0.7824
	0.4425	0.684783	0.658345	1.16101		0.044129	0.166948	0.044604		0.4425	0.89579	0.594042		0.277394	0.7824
	0.4435	0.684783	0.658345	1.13253		0.044129	0.166948	0.044604		0.4435	0.996389	0.594042		0.277394	0.7824
	0.4445	0.684783	0.658345	1.09933		0.044129	0.166948	0.044604		0.4445	0.996389	0.594042		0.277394	0.7824
	0.4455	0.684783	0.658345	1.09933		0.044129	0.166948	0.044604		0.4455	0.996389	0.594042		0.277394	0.7824
	0.4465	0.684783	0.658345	1.09933		0.044129	0.166948	0.044604		0.4465	0.996389	0.594042		0.277394	0.7824
	0.4475	0.684783	0.658345	1.08077		0.044129	0.166948	0.044604		0.4475	0.996389	0.63115		0.277394	0.7824
	0.4485	0.620868	0.658345	1.08077		0.044129	0.166948	0.044604		0.4485	1.01879	0.63115		0.277394	0.7824
	0.4495	0.620868	0.658345	1.08077		0.044129	0.166948	0.044604		0.4495	1.02022	0.63115		0.277394	0.7824
	0.4505	0.620868	0.658345	1.08077		0.044129	0.166948	0.044604		0.4505	1.02022	0.63115		0.277394	0.7824
	0.4515	0.620868	0.658345	1.08077		0.044129	0.166948	0.044604		0.4515	1.02022	0.63115		0.277394	0.7824
	0.4525	0.620868	0.658345	1.04866		0.044129	0.166948	0.044604		0.4525	1.02022	0.63115		0.277394	0.7824
	0.4535	0.762073	0.658345	1.04866		0.044129	0.166948	0.044604		0.4535	1.00892	0.63115		0.277394	0.7824
	0.4545	0.762073	0.658345	1.04866		0.044129	0.166948	0.044604		0.4545	1.07611	0.63115		0.277394	0.7824
	0.4555	0.762073	0.658345	1.04866		0.044129	0.166948	0.044604		0.4555	1.07611	0.63115		0.277394	0.7824
	0.4565	0.762073	0.658345	1.04866		0.044129	0.166948	0.044604		0.4565	1.07611	0.63115		0.277394	0.7824
	0.4575	0.762073	0.658345	1.04866		0.044129	0.166948	0.044604		0.4575	1.07611	0.63115		0.277394	0.565724
	0.4585	0.762073	0.587017	1.04866		0.044129	0.166948	0.044604		0.4585	1.07611	0.63115		0.277394	0.565724
	0.4595	0.762073	0.587017	1.04866		0.044129	0.166948	0.044604		0.4595	1.07611	0.63115		0.277394	0.565724
	0.4605	0.762073	0.915894	1.04866		0.044129	0.166948	0.044604		0.4605	1.07611	0.63115		0.277394	0.565724
	0.4615	0.762073	0.915894	1.04866		0.044129	0.166948	0.044604		0.4615	1.07611	0.63115		0.277394	0.565724
	0.4625	0.762073	0.900309	1.04866		0.044129	0.166948	0.044604		0.4625	1.07611	0.63115		0.277394	0.621602
	0.4635	0.762073	0.900309	1.04866		0.044129	0.166948	0.044604		0.4635	1.07611	0.63115		0.277394	0.621602
	0.4645	0.762073	0.900309	1.005		0.044129	0.229948	0.044604		0.4645	1.07611	0.63115		0.277394	0.621602
	0.4655	0.762073	0.900309	1.005		0.044129	0.229948	0.044604		0.4655	1.07611	0.63115		0.277394	0.621602
	0.4665	0.762073	0.900309	1.005		0.044129	0.229948	0.044604		0.4665	1.19131	0.94592		0.277394	0.621602
	0.4675	0.762073	0.900309	1.005		0.044129	0.229948	0.044604		0.4675	1.19131	0.94592		0.277394	0.621602
	0.4685	0.762073	0.900309	1.005		0.044129	0.229948	0.044604		0.4685	1.19131	0.94592		0.277394	0.621602
	0.4695	0.762073	0.900309	1.00442		0.044129	0.229948	0.044604		0.4695	1.19131	0.94592		0.277394	0.621602
	0.4705	0.762073	0.900309	0.982078		0.044129	0.229948	0.044604		0.4705	1.19131	0.926682		0.277394	0.621602
	0.4715	0.762073	0.900309	0.982078		0.044129	0.229948	0.044604		0.4715	1.18394	0.926682		0.19799	0.621602
	0.4725	0.762073	0.900309	0.982078		0.044129	0.229948	0.044604		0.4725	1.18394	0.926682		0.19799	0.621602
	0.4735	0.762073	0.900309	0.982078		0.044129	0.229948	0.044604		0.4735	1.19093	0.926682		0.19799	0.621602
	0.4745	0.762073	0.900309	0.982078		0.044129	0.229948	0.044604		0.4745	1.19093	0.926682		0.19799	0.621602
	0.4755	0.762073	0.900309	0.982078		0.044129	0.229948	0.044604		0.4755	1.19093	0.926682		0.19799	0.621602
	0.4765	0.762073	0.900309	0.982078		0.044129	0.229948	0.044604		0.4765	1.19093	0.926682		0.19799	0.621602
	0.4775	0.762073	0.900309	0.982078		0.044129	0.229948	0.044604		0.4775	1.19093	0.926682		0.19799	0.621602
	0.4785	0.762073	0.900309	0.982078		0.044129	0.229948	0.044604		0.4785	1.19093	0.926682		0.19799	0.621602
	0.4795	0.762073	0.900309	0.982078		0.044129	0.229948	0.044604		0.4795	1.2125	0.926682		0.19799	0.621602
	0.4805	0.762073	0.900309	0.982078		0.044129	0.229948	0.044604		0.4805	1.2125	0.926682		0.19799	0.621602
	0.4815	0.762073	0.519675	0.982078		0.044129	0.229948	0.044604		0.4815	1.2125	1.02233		0.19799	0.621602
	0.4825	0.762073	0.519675	0.982078		0.044129	0.229948	0.044604		0.4825	1.2125	1.02233		0.19799	0.621602
	0.4835	0.762073	0.519675	0.982078		0.044129	0.229948	0.044604		0.4835	1.2125	1.02233		0.19799	0.621602
	0.4845	0.762073	0.519675	0.982078		0.044129	0.229948	0.044604		0.4845	1.2125	1.02233		0.19799	0.621602
	0.4855	0.762073	0.519675	0.982078		0.044129	0.229948	0.044604		0.4855	1.2125	1.02233		0.19799	0.621602
	0.4865	0.762073	0.519675	0.982078		0.044129	0.229948	0.044604		0.4865	1.2125	1.02233		0.19799	0.621602
	0.4875	0.762073	0.639132	0.982078		0.044129	0.229948	0.044604		0.4875	1.2125	1.02233		0.19799	0.621602
	0.4885	0.762073	0.639132	0.982078		0.044129	0.229948	0.044604		0.4885	1.2125	1.02233		0.19799	0.621602
	0.4895	0.762073	0.639132	0.982078		0.044129	0.229948	0.044604		0.4895	1.2125	1.02233		0.19799	0.621602
	0.4905	0.655156	0.639132	0.982078		0.044129	0.229948	0.044604		0.4905	1.11424	1.02233		0.19799	0.621602
	0.4915	0.655156	0.670385	0.982078		0.044129	0.229948	0.044604		0.4915	1.11424	1.02233		0.19799	0.621602
	0.4925	0.655156	0.670385	0.982078		0.044129	0.229948	0.044604		0.4925	1.11424	1.02233		0.19799	0.503848
	0.4935	0.655156	0.670385	0.982078		0.044129	0.229948	0.044604		0.4935	1.11424	1.03094		0.19799	0.503848
	0.4945	0.655156	0.670385	0.982078		0.044129	0.229948	0.044604		0.4945	1.11424	1.03094		0.19799	0.503848
	0.4955	0.655156	0.670385	0.982078		0.044129	0.229948	0.044604		0.4955	1.11424	1.03094		0.19799	0.503848
	0.4965	0.655156	0.670385	0.982078		0.044129	0.229948	0.044604		0.4965	1.11424	1.03094		0.19799	0.503848
	0.4975	0.655156	0.670385	0.982078		0.044129	0.229948	0.044604		0.4975	1.11424	1.03094		0.19799	0.503848
	0.4985	0.655156	0.670385	0.982078		0.044129	0.229948	0.044604		0.4985	1.11424	0.747254		0.19799	0.503848
	0.4995	0.655156	0.670385	0.982078		0.044129	0.229948	0.044604		0.4995	1.07852	0.747254		0.19799	0.503848
	0.5005	0.655156	0.670385	0.982078		0.044129	0.229948	0.044604		0.5005	1.07852	0.747254		0.339978	0.503848
	0.5015	0.655156	0.670385	0.982078		0.044129	0.229948	0.044604		0.5015	1.07852	0.747254		0.339978	0.503848
	0.5025	0.655156	0.670385	0.984058		0.044129	0.229948	0.044604		0.5025	1.07852	0.747254		0.339978	0.503848
	0.5035	0.655156	0.670385	0.984058		0.044129	0.229948	0.044604		0.5035	1.07852	0.747254		0.339978	0.503848
	0.5045	0.655156	0.670385	0.984058		0.044129	0.229948	0.044604		0.5045	1.07852	0.747254		0.339978	0.450174
	0.5055	0.655156	0.670385	0.984058		0.044129	0.229948	0.044604		0.5055	1.07852	0.747254		0.339978	0.450174
	0.5065	0.655156	0.670385	0.984058		0.044129	0.229948	0.044604		0.5065	1.07852	0.763185		0.339978	0.450174
	0.5075	0.655156	0.670385	0.984058		0.044129	0.229948	0.044604		0.5075	1.07852	0.763185		0.339978	0.450174
	0.5085	0.655156	0.670385	0.984058		0.044129	0.229948	0.044604		0.5085	1.07852	0.763185		0.339978	0.450174
	0.5095	0.655156	0.670385	0.998103		0.044129	0.229948	0.044604		0.5095	1.07852	0.763185		0.339978	0.450174
	0.5105	0.681492	0.758611	0.998103		0.044129	0.229948	0.044604		0.5105	1.07852	0.763185		0.339978	0.450174
	0.5115	0.681492	0.758611	0.998103		0.044129	0.229948	0.044604		0.5115	1.07852	0.763185		0.339978	0.450174
	0.5125	0.681492	0.837351	0.998103		0.044129	0.229948	0.044604		0.5125	1.07852	0.763185		0.335719	0.450174
	0.5135	0.681492	0.837351	0.998103		0.044129	0.229948	0.044604		0.5135	1.07852	0.763185		0.335719	0.450174
	0.5145	0.681492	0.837351	0.998103		0.044129	0.229948	0.044604		0.5145	1.07852	0.763185		0.335719	0.450174
	0.5155	0.681492	0.837351	0.998103		0.044129	0.231117	0.044604		0.5155	1.03086	0.763185		0.335719	0.450174
	0.5165	0.681492	0.837351	0.998103		0.044129	0.179704	0.044604		0.5165	1.05723	0.738246		0.335719	0.450174
	0.5175	0.681492	0.837351	0.998103		0.044129	0.179704	0.044604		0.5175	1.05723	0.738246		0.335719	0.450174
	0.5185	0.681492	0.837351	0.998103		0.044129	0.179704	0.044604		0.5185	1.05723	0.738246		0.335719	0.450174
	0.5195	0.681492	0.837351	0.998103		0.044129	0.179704	0.044604		0.5195	1.05723	0.738246		0.335719	0.450174
	0.5205	0.681492	0.846182	0.998103		0.044129	0.179704	0.044604		0.5205	1.05723	0.738246		0.335719	0.450174
	0.5215	0.681492	1.14105	0.998103		0.044129	0.179704	0.044604		0.5215	1.05723	0.738246		0.335719	0.450174
	0.5225	0.82464	1.14105	0.998103		0.044129	0.179704	0.044604		0.5225	1.05723	0.738246		0.335719	0.450174
	0.5235	0.82464	1.14105	0.998103		0.044129	0.179704	0.044604		0.5235	1.1048	0.738246		0.335719	0.450174
	0.5245	0.82464	1.14105	0.998103		0.044129	0.179704	0.044604		0.5245	1.1048	0.738246		0.335719	0.450174
	0.5255	0.82464	1.66309	0.998103		0.044129	0.179704	0.044604		0.5255	1.08263	0.738246		0.335719	0.450174
	0.5265	0.82464	1.66309	0.998103		0.044129	0.179704	0.044604		0.5265	1.05309	0.840342		0.236854	0.450174
	0.5275	0.82464	1.66309	0.998103		0.044129	0.179704	0.044604		0.5275	1.05309	0.835001		0.236854	0.450174
	0.5285	0.903264	1.66309	0.998103		0.044129	0.179704	0.044604		0.5285	1.04955	0.835001		0.236854	0.450174
	0.5295	0.917078	0.943718	0.945007		0.044129	0.179704	0.044604		0.5295	1.04955	0.835001		0.236854	0.450174
	0.5305	0.917078	0.943718	0.984052		0.044129	0.179704	0.044604		0.5305	1.04955	0.835001		0.236854	0.450174
	0.5315	0.917078	0.943718	0.984052		0.044129	0.179704	0.044604		0.5315	1.04955	0.835001		0.236854	0.450174
	0.5325	0.917078	0.943718	0.984052		0.044129	0.179704	0.044604		0.5325	1.04955	0.835001		0.236854	0.450174
	0.5335	0.917078	0.709754	0.964799		0.044129	0.179704	0.044604		0.5335	1.04955	0.835001		0.236854	0.450174
	0.5345	0.917078	0.709754	0.964799		0.044129	0.179704	0.044604		0.5345	1.04955	0.835001		0.236854	0.450174
	0.5355	0.917078	0.709754	0.964799		0.044129	0.179704	0.044604		0.5355	1.04955	0.835001		0.236854	0.450174
	0.5365	0.917078	0.709754	0.964799		0.044129	0.179704	0.044604		0.5365	1.04955	0.835001		0.236854	0.450174
	0.5375	0.917078	0.709754	0.964799		0.044129	0.179704	0.044604		0.5375	1.08479	0.902017		0.236854	0.450174
	0.5385	0.917078	0.709754	0.964799		0.044129	0.179704	0.044604		0.5385	1.08479	0.902017		0.236854	0.450174
	0.5395	1.00132	0.709754	0.964799		0.044129	0.179704	0.044604		0.5395	1.08479	0.902017		0.236854	0.450174
	0.5405	1.00132	0.709754	0.964799		0.044129	0.179704	0.044604		0.5405	1.08479	0.902017		0.236854	0.450174
	0.5415	1.00132	0.709754	0.964799		0.044129	0.179704	0.044604		0.5415	1.08479	0.902017		0.236854	0.450174
	0.5425	1.00132	0.709754	0.964799		0.044129	0.179704	0.044604		0.5425	1.08479	0.902017		0.236854	0.53895
	0.5435	1.00132	0.709754	0.964799		0.044129	0.179704	0.044604		0.5435	1.10809	0.902017		0.236854	0.53895
	0.5445	1.00132	0.709754	0.964799		0.044129	0.179704	0.044604		0.5445	1.10809	0.968818		0.236854	0.53895
	0.5455	1.00132	0.709754	0.964799		0.044129	0.179704	0.044604		0.5455	1.10809	0.968818		0.236854	0.53895
	0.5465	1.00132	0.709754	0.964799		0.044129	0.179704	0.044604		0.5465	1.10809	0.968818		0.236854	0.53895
	0.5475	1.00132	0.709754	0.964799		0.044129	0.179704	0.044604		0.5475	1.10809	0.931964		0.236854	0.53895
	0.5485	1.00132	0.739016	0.964799		0.044129	0.179704	0.044604		0.5485	1.10809	0.931964		0.236854	0.53895
	0.5495	1.00132	0.739016	0.964799		0.044129	0.179704	0.044604		0.5495	1.08427	0.931964		0.236854	0.53895
	0.5505	1.00132	0.739016	0.964799		0.044129	0.179704	0.044604		0.5505	1.08427	0.931964		0.236854	0.53895
	0.5515	1.00132	0.739016	0.964799		0.044129	0.179704	0.044604		0.5515	1.08427	0.931964		0.236854	0.53895
	0.5525	1.00132	0.739016	0.964799		0.044129	0.179704	0.044604		0.5525	1.08427	1.00801		0.236854	0.53895
	0.5535	1.00132	0.739016	0.964799		0.044129	0.179704	0.044604		0.5535	1.08427	1.03237		0.236854	0.53895
	0.5545	1.00132	0.739016	0.964799		0.044129	0.179704	0.044604		0.5545	1.08427	1.03237		0.236854	0.53895
	0.5555	1.00132	0.739016	0.964799		0.044129	0.179704	0.044604		0.5555	1.08427	1.03237		0.236854	0.53895
	0.5565	1.00132	0.739016	0.964799		0.044129	0.179704	0.044604		0.5565	1.08427	1.03237		0.236854	0.53895
	0.5575	1.00132	0.739016	0.964799		0.044129	0.179704	0.044604		0.5575	1.08427	1.03237		0.236854	0.53895
	0.5585	1.00132	0.739016	0.964799		0.044129	0.179704	0.044604		0.5585	1.08427	1.03237		0.236854	0.52497
	0.5595	1.00132	0.739016	0.964799		0.044129	0.179704	0.044604		0.5595	1.08427	1.03237		0.236854	0.52497
	0.5605	1.00132	0.749234	0.964799		0.044129	0.179704	0.044604		0.5605	1.08427	1.03237		0.236854	0.52497
	0.5615	1.00132	0.67563	0.964799		0.044129	0.179704	0.044604		0.5615	1.08427	1.03237		0.236854	0.52497
	0.5625	1.00132	0.67563	0.964799		0.044129	0.179704	0.044604		0.5625	1.08427	1.03237		0.236854	0.52497
	0.5635	1.00132	0.754946	0.964799		0.044129	0.179704	0.044604		0.5635	1.08427	1.03237		0.236854	0.52497
	0.5645	1.00132	0.754946	0.964799		0.044129	0.179704	0.044604		0.5645	1.00249	1.03237		0.236854	0.52497
	0.5655	1.00132	0.849096	0.964799		0.044129	0.179704	0.044604		0.5655	1.00249	1.03237		0.236854	0.52497
	0.5665	1.00132	0.849096	0.964799		0.044129	0.179704	0.044604		0.5665	1.00249	1.03237		0.236854	0.52497
	0.5675	1.00132	0.827309	0.964799		0.044129	0.179704	0.044604		0.5675	0.982284	1.03237		0.236854	0.52497
	0.5685	1.00132	0.827309	0.964799		0.044129	0.179704	0.044604		0.5685	0.982284	1.03237		0.236854	0.52497
	0.5695	1.00132	0.827309	0.964799		0.044129	0.179704	0.044604		0.5695	0.982284	1.03237		0.236854	0.52497
	0.5705	1.00132	0.827309	0.964799		0.044129	0.179704	0.044604		0.5705	0.982284	1.03237		0.236854	0.52497
	0.5715	1.00132	0.827309	0.964799		0.044129	0.179704	0.044604		0.5715	0.982284	1.03237		0.236854	0.52497
	0.5725	1.00132	0.827309	0.964799		0.044129	0.179704	0.044604		0.5725	0.982284	1.03237		0.236854	0.52497
	0.5735	1.00132	0.827309	0.964799		0.044129	0.179704	0.044604		0.5735	0.982284	1.03237		0.236854	0.52497
	0.5745	1.00132	0.827309	0.964799		0.044129	0.179704	0.044604		0.5745	0.982284	1.03237		0.236854	0.52497
	0.5755	1.00132	0.827309	0.964799		0.044129	0.179704	0.044604		0.5755	0.982284	1.03237		0.236854	0.52497
	0.5765	1.00132	0.827309	0.964799		0.044129	0.179704	0.044604		0.5765	0.982284	1.03237		0.236854	0.52497
	0.5775	1.00132	0.827309	0.964799		0.044129	0.179704	0.044604		0.5775	0.982284	1.03237		0.236854	0.52497
	0.5785	1.00132	0.827309	0.964799		0.044129	0.179704	0.044604		0.5785	0.982284	1.03237		0.34311	0.52497
	0.5795	1.00132	0.827309	0.964799		0.044129	0.179704	0.044604		0.5795	0.981694	1.03237		0.34311	0.52497
	0.5805	0.994683	0.827309	0.964799		0.044129	0.179704	0.044604		0.5805	0.981694	1.03237		0.34311	0.486337
	0.5815	0.994683	0.827309	1.04413		0.044129	0.179704	0.044604		0.5815	0.981694	1.03237		0.34311	0.486337
	0.5825	0.994683	0.827309	1.04413		0.044129	0.179704	0.044604		0.5825	0.981694	1.03237		0.34311	0.486337
	0.5835	0.994683	0.770675	1.04413		0.044129	0.179704	0.044604		0.5835	0.981694	1.08899		0.34311	0.486337
	0.5845	0.994683	0.770675	1.04413		0.044129	0.179704	0.044604		0.5845	0.994752	1.08899		0.353889	0.486337
	0.5855	0.987534	0.770675	1.04413		0.044129	0.179704	0.044604		0.5855	0.994752	1.08899		0.353889	0.486337
	0.5865	0.987534	0.770675	1.04413		0.044129	0.179704	0.044604		0.5865	0.994752	1.08899		0.288921	0.486337
	0.5875	0.987534	0.770675	1.04413		0.044129	0.179704	0.044604		0.5875	1.0073	1.11912		0.288921	0.486337
	0.5885	0.987534	0.770675	1.04413		0.044129	0.179704	0.044604		0.5885	1.0073	1.05867		0.288921	0.486337
	0.5895	1.09749	0.770675	0.986866		0.044129	0.179704	0.044604		0.5895	1.0073	1.05867		0.288921	0.486337
	0.5905	1.09749	0.770675	0.932794		0.044129	0.179704	0.044604		0.5905	1.0073	1.05867		0.288921	0.486337
	0.5915	1.09749	0.770675	0.932794		0.044129	0.179704	0.044604		0.5915	1.0073	1.05867		0.288921	0.486337
	0.5925	1.09749	0.770675	0.932794		0.044129	0.179704	0.044604		0.5925	1.0073	1.05867		0.288921	0.486337
	0.5935	1.09749	0.770675	0.932794		0.044129	0.179704	0.044604		0.5935	1.0073	1.05867		0.288921	0.486337
	0.5945	1.09749	0.770675	0.932794		0.044129	0.179704	0.044604		0.5945	1.0073	1.05867		0.288921	0.486337
	0.5955	1.09749	0.770675	0.932794		0.044129	0.179704	0.044604		0.5955	1.0073	1.11625		0.288921	0.486337
	0.5965	1.09749	0.770675	0.932794		0.044129	0.179704	0.044604		0.5965	1.02798	1.11625		0.288921	0.486337
	0.5975	1.57123	0.770675	0.932794		0.044129	0.179704	0.044604		0.5975	1.1064	1.11625		0.285967	0.486337
	0.5985	1.57123	0.819888	0.932794		0.044129	0.179704	0.044604		0.5985	1.1064	1.11625		0.285967	0.486337
	0.5995	1.57123	0.819888	0.932794		0.044129	0.179704	0.044604		0.5995	1.1064	1.11625		0.285967	0.486337
	0.6005	1.57123	0.819888	0.943356		0.044129	0.179704	0.044604		0.6005	1.1064	1.11625		0.285967	0.486337
	0.6015	1.68506	0.819888	0.943356		0.044129	0.179704	0.044604		0.6015	1.1064	1.11625		0.285967	0.486337
	0.6025	1.81141	0.819888	0.943356		0.044129	0.179704	0.044604		0.6025	1.34371	1.11625		0.285967	0.486337
	0.6035	1.81141	0.819888	0.943356		0.044129	0.179704	0.044604		0.6035	1.3304	1.11625		0.285967	0.486337
	0.6045	1.81141	0.975111	0.943356		0.044129	0.179704	0.044604		0.6045	1.3304	1.11625		0.285967	0.486337
	0.6055	1.81141	0.975111	0.943356		0.044129	0.179704	0.044604		0.6055	1.3304	1.11625		0.285967	0.486337
	0.6065	1.81141	0.975111	0.943356		0.044129	0.179704	0.044604		0.6065	1.3304	1.11625		0.285967	0.486337
	0.6075	1.81141	0.975111	0.943356		0.044129	0.179704	0.044604		0.6075	1.3304	1.11625		0.285967	0.486337
	0.6085	1.81141	0.975111	0.943356		0.044129	0.179704	0.044604		0.6085	1.3304	1.1879		0.285967	0.486337
	0.6095	1.81141	0.975111	0.943356		0.044129	0.179704	0.044604		0.6095	1.3304	1.1879		0.285967	0.486337
	0.6105	1.81141	0.975111	0.943356		0.044129	0.179704	0.044604		0.6105	1.3304	1.1879		0.285967	0.486337
	0.6115	1.81141	0.975111	0.926043		0.044129	0.179704	0.044604		0.6115	1.3304	1.1879		0.285967	0.486337
	0.6125	1.77776	0.975111	0.926043		0.044129	0.179704	0.044604		0.6125	1.3304	1.1879		0.285967	0.486337
	0.6135	1.77776	0.975111	0.926043		0.044129	0.179704	0.044604		0.6135	1.3304	1.1879		0.285967	0.486337
	0.6145	1.77776	0.975111	0.926043		0.044129	0.179704	0.044604		0.6145	1.3304	1.1879		0.285967	0.486337
	0.6155	1.77776	0.975111	0.926043		0.044129	0.179704	0.044604		0.6155	1.38485	1.1879		0.285967	0.486337
	0.6165	1.77776	0.975111	0.952379		0.044129	0.179704	0.044604		0.6165	1.38485	1.1879		0.285967	0.64106
	0.6175	1.77776	0.975111	0.952379		0.044129	0.179704	0.044604		0.6175	1.33434	1.1879		0.285967	0.64106
	0.6185	1.77776	1.11331	0.952379		0.044129	0.179704	0.044604		0.6185	1.33577	1.1879		0.285967	0.64106
	0.6195	1.77776	1.11331	0.952379		0.044129	1.85084	0.044604		0.6195	1.33577	1.1879		0.285967	0.64106
	0.6205	1.77776	1.11331	0.952379		0.044129	1.85084	0.044604		0.6205	1.33577	1.1879		0.285967	0.64106
	0.6215	1.77776	0.932656	0.952379		0.044129	1.85084	0.044604		0.6215	1.33577	1.1879		0.261484	0.64106
	0.6225	1.77776	0.932656	0.952379		0.044129	1.85084	0.044604		0.6225	1.33577	1.1879		0.261484	0.974042
	0.6235	1.77776	0.932656	0.952379		0.044129	0.186741	0.044604		0.6235	1.33577	1.1879		0.261484	0.974042
	0.6245	1.77776	0.932656	0.951191		0.044129	0.186741	0.044604		0.6245	1.33577	1.1879		0.261484	0.974042
	0.6255	1.77776	0.932656	0.951191		0.044129	0.186741	0.044604		0.6255	1.42888	1.1879		0.261484	0.974042
	0.6265	1.77776	0.932656	0.951191		0.044129	0.186741	0.044604		0.6265	1.42888	1.1879		0.261484	0.974042
	0.6275	1.77776	0.932656	0.917341		0.044129	0.186741	0.044604		0.6275	1.42888	1.15229		0.261484	0.974042
	0.6285	1.78967	0.932656	0.917341		0.044129	0.186741	0.044604		0.6285	1.42888	1.15229		0.261484	0.974042
	0.6295	1.78967	0.932656	0.917341		0.044129	0.186741	0.044604		0.6295	1.42888	1.15229		0.261484	0.974042
	0.6305	1.78967	0.932656	0.940441		0.044129	0.186741	0.044604		0.6305	1.42888	1.15229		0.261484	0.974042
	0.6315	1.78967	0.932656	0.940441		0.044129	0.186741	0.044604		0.6315	1.42888	1.15229		0.261484	0.974042
	0.6325	1.78967	1.18247	0.940441		0.044129	0.186741	0.044604		0.6325	1.42888	1.15229		0.261484	0.974042
	0.6335	1.78967	1.18247	0.940441		0.044129	0.186741	0.044604		0.6335	1.42888	1.15229		0.261484	0.974042
	0.6345	1.73154	1.18247	0.940441		0.044129	0.186741	0.044604		0.6345	1.42888	1.16195		0.261484	0.974042
	0.6355	1.73154	1.18247	0.940441		0.044129	0.186741	0.044604		0.6355	1.42888	1.16195		0.261484	0.974042
	0.6365	1.73154	1.18247	0.940441		0.044129	0.186741	0.044604		0.6365	1.42888	1.16195		0.261484	0.974042
	0.6375	1.73154	1.18247	0.940441		0.044129	0.186741	0.044604		0.6375	1.42888	1.16195		0.261484	0.974042
	0.6385	1.73154	1.18247	0.940441		0.044129	0.186741	0.044604		0.6385	1.42888	1.16195		0.261484	0.974042
	0.6395	1.73154	1.18247	0.940441		0.044129	0.186741	0.044604		0.6395	1.42888	1.16195		0.261484	0.974042
	0.6405	1.73154	1.18247	0.940441		0.044129	0.186741	0.044604		0.6405	1.42888	1.16195		0.261484	0.974042
	0.6415	1.73154	1.16455	0.940441		0.044129	0.186741	0.044604		0.6415	1.38265	1.16195		0.261484	0.974042
	0.6425	1.73154	1.0177	0.940441		0.044129	0.186741	0.044604		0.6425	1.38265	1.16195		0.261484	0.974042
	0.6435	1.14221	1.0177	0.940441		0.044129	0.186741	0.044604		0.6435	1.27446	1.16195		0.261484	0.489912
	0.6445	1.14221	1.02239	0.940441		0.044129	0.186741	0.044604		0.6445	1.27446	1.16195		0.261484	0.489912
	0.6455	1.14221	1.02239	1.1044		0.044129	0.186741	0.044604		0.6455	1.27446	1.45471		0.261484	0.489912
	0.6465	1.21338	1.02239	1.1044		0.044129	0.186741	0.044604		0.6465	1.33977	1.45471		0.261484	0.354301
	0.6475	1.28174	0.948791	1.1044		0.044129	0.186741	0.044604		0.6475	1.33977	1.45471		0.261484	0.354301
	0.6485	1.28174	0.948791	1.1044		0.044129	0.186741	0.044604		0.6485	1.33977	1.45471		0.261484	0.354301
	0.6495	1.28174	0.948791	1.1044		0.044129	0.186741	0.044604		0.6495	1.28172	1.45471		0.261484	0.354301
	0.6505	1.28174	0.948791	1.1044		0.044129	0.186741	0.044604		0.6505	1.28172	1.45471		0.261484	0.354301
	0.6515	1.19357	0.948791	1.1044		0.044129	0.186741	0.044604		0.6515	1.28172	1.45471		0.261484	0.354301
	0.6525	1.19357	0.948791	1.1044		0.044129	0.186741	0.044604		0.6525	1.28172	1.45471		0.281191	0.354301
	0.6535	1.19357	0.948791	1.1044		0.044129	0.186741	0.044604		0.6535	1.28172	1.45471		0.281191	0.354301
	0.6545	1.19357	0.948791	1.08836		0.044129	0.186741	0.044604		0.6545	1.33208	1.38871		0.281191	0.354301
	0.6555	1.19357	0.948791	1.08836		0.044129	0.186741	0.044604		0.6555	1.33208	1.38871		0.281191	0.354301
	0.6565	1.19357	0.948791	1.08836		0.044129	0.186741	0.044604		0.6565	1.33208	1.38871		0.281191	0.354301
	0.6575	1.19357	0.948791	1.08836		0.044129	0.186741	0.044604		0.6575	1.33208	1.68916		0.281191	0.354301
	0.6585	1.22716	0.948791	1.08836		0.044129	0.186741	0.044604		0.6585	1.33208	1.68916		0.281191	0.354301
	0.6595	1.15678	0.948791	1.08836		0.044129	0.186741	0.044604		0.6595	1.2729	1.75834		0.281191	0.354301
	0.6605	1.15678	0.948791	1.08836		0.044129	0.186741	0.044604		0.6605	1.2729	1.75834		0.281191	0.354301
	0.6615	1.15678	0.948791	1.08836		0.044129	0.186741	0.044604		0.6615	1.2729	1.75834		0.281191	0.354301
	0.6625	1.15678	0.948791	1.08836		0.044129	0.186741	0.044604		0.6625	1.2729	1.75834		0.281191	0.354301
	0.6635	1.15678	0.948791	1.08836		0.044129	0.186741	0.044604		0.6635	1.2729	1.75834		0.281191	0.354301
	0.6645	1.15678	0.948791	1.08836		0.044129	0.186741	0.044604		0.6645	1.30239	1.75834		0.281191	0.354301
	0.6655	1.15678	0.948791	1.08836		0.044129	0.186741	0.044604		0.6655	1.35193	1.41396		0.281191	0.354301
	0.6665	1.25379	0.948791	1.08836		0.044129	0.186741	0.044604		0.6665	1.35193	1.41396		0.281191	0.354301
	0.6675	1.25379	0.948791	1.08836		0.044129	0.199099	0.044604		0.6675	1.35193	1.41396		0.281191	0.354301
	0.6685	1.25379	0.948791	1.08836		0.044129	0.199099	0.044604		0.6685	1.36478	1.48331		0.281191	0.354301
	0.6695	1.25379	0.887306	1.08836		0.044129	0.199099	0.044604		0.6695	1.36478	1.48331		0.281191	0.354301
	0.6705	1.25379	0.887306	1.0815		0.044129	0.199099	0.044604		0.6705	1.36478	1.48331		0.281191	0.354301
	0.6715	1.25379	0.887306	1.0815		0.044129	0.199099	0.044604		0.6715	1.36478	1.48331		0.281191	0.354301
	0.6725	1.25379	0.871149	1.0815		0.044129	0.199099	0.044604		0.6725	1.36478	1.48331		0.281191	0.354301
	0.6735	1.25379	0.871149	1.0815		0.044129	0.199099	0.044604		0.6735	1.38616	1.48331		0.281191	0.354301
	0.6745	1.25379	0.871149	1.0815		0.044129	0.199099	0.044604		0.6745	1.38575	1.48331		0.281191	0.354301
	0.6755	1.27466	0.871149	1.0815		0.044129	0.199099	0.044604		0.6755	1.24865	1.48331		0.281191	0.354301
	0.6765	1.1561	0.871149	0.812835		0.044129	0.199099	0.044604		0.6765	1.24865	1.48331		0.208245	0.354301
	0.6775	1.1561	0.871149	0.812835		0.044129	0.199099	0.044604		0.6775	1.24865	1.48331		0.208245	0.354301
	0.6785	1.14281	0.871149	0.812835		0.044129	0.199099	0.044604		0.6785	1.24865	1.48331		0.208245	0.354301
	0.6795	1.14281	0.974979	0.812835		0.044129	0.199099	0.044604		0.6795	1.24865	1.48331		0.208245	0.354301
	0.6805	1.14281	1.34677	0.812835		0.044129	0.199099	0.044604		0.6805	1.24865	1.19896		0.208245	0.354301
	0.6815	1.14281	1.34677	0.812835		0.044129	0.199099	0.044604		0.6815	1.24865	1.3533		0.208245	0.354301
	0.6825	1.14281	1.34677	0.812835		0.044129	0.199099	0.044604		0.6825	1.24865	1.3533		0.208245	0.354301
	0.6835	1.14281	1.34677	0.812835		0.044129	0.199099	0.044604		0.6835	1.24865	1.3533		0.208245	0.354301
	0.6845	1.25937	1.26843	0.812835		0.044129	0.199099	0.044604		0.6845	1.24865	1.3533		0.208245	0.354301
	0.6855	1.25937	1.26843	0.812835		0.044129	0.199099	0.044604		0.6855	1.24865	1.3533		0.208245	0.354301
	0.6865	1.25937	1.26843	0.812835		0.044129	0.199099	0.044604		0.6865	1.24865	1.3533		0.208245	0.354301
	0.6875	1.25937	1.26843	0.812835		0.044129	0.207675	0.044604		0.6875	1.24865	1.3533		0.208245	0.354301
	0.6885	1.25937	1.26843	0.812835		0.044129	0.207675	0.044604		0.6885	1.3069	1.3533		0.208245	0.354301
	0.6895	1.25937	1.26843	0.812835		0.044129	0.207675	0.044604		0.6895	1.3069	1.3533		0.208245	0.354301
	0.6905	1.27352	1.31605	0.812835		0.044129	0.207675	0.044604		0.6905	1.3069	1.3533		0.208245	0.354301
	0.6915	1.27352	1.31605	0.812835		0.044129	0.207675	0.044604		0.6915	1.3069	1.3533		0.208245	0.354301
	0.6925	1.27352	1.37523	0.812835		0.044129	0.207675	0.044604		0.6925	1.3069	1.3533		0.208245	0.354301
	0.6935	1.27352	1.00242	0.812835		0.044129	0.207675	0.044604		0.6935	1.3069	1.3338		0.208245	0.354301
	0.6945	1.27352	1.00242	0.812835		0.044129	0.207675	0.044604		0.6945	1.3069	1.3338		0.208245	0.354301
	0.6955	1.27352	1.00242	0.812835		0.044129	0.207675	0.044604		0.6955	1.3069	1.3338		0.208245	0.354301
	0.6965	1.27352	1.00242	0.812835		0.044129	0.207675	0.044604		0.6965	1.32165	1.35859		0.208245	0.354301
	0.6975	1.27352	1.00242	0.812835		0.044129	0.207675	0.044604		0.6975	1.32165	1.35859		0.208245	0.354301
	0.6985	1.27352	1.00242	0.812835		0.044129	0.207675	0.044604		0.6985	1.32165	1.35859		0.208245	0.354301
	0.6995	1.27352	1.00242	0.812835		0.044129	0.207675	0.044604		0.6995	1.32165	1.35859		0.208245	1.21903
	0.7005	1.27352	0.975829	0.812835		0.044129	0.207675	0.044604		0.7005	1.32165	1.34292		0.208245	1.21903
	0.7015	1.27352	0.975829	0.812835		0.044129	0.207675	0.044604		0.7015	1.32165	1.34292		0.208245	1.21903
	0.7025	1.27352	0.975829	0.830286		0.044129	0.207675	0.044604		0.7025	1.32165	1.34292		0.208245	1.21903
	0.7035	1.27352	0.975829	0.830286		0.044129	0.207675	0.044604		0.7035	1.32165	1.34292		0.208245	1.21903
	0.7045	1.27352	0.975829	0.830286		0.044129	0.207675	0.044604		0.7045	1.36107	1.34292		0.208245	1.21903
	0.7055	1.27352	0.975829	0.830286		0.044129	0.207675	0.044604		0.7055	1.36107	1.35525		0.208245	1.21903
	0.7065	1.27352	0.975829	0.830286		0.044129	0.207675	0.044604		0.7065	1.37733	1.35525		0.208245	1.21903
	0.7075	1.27352	0.975829	0.830286		0.044129	0.207675	0.044604		0.7075	1.37733	1.35525		0.208245	1.21903
	0.7085	1.27352	0.975829	0.850505		0.044129	0.784518	0.044604		0.7085	1.37733	1.35525		0.208245	0.281388
	0.7095	1.27352	0.975829	0.850505		0.044129	0.784518	0.044604		0.7095	1.37733	1.35525		0.208245	0.281388
	0.7105	1.17984	0.975829	0.850505		0.044129	0.784518	0.044604		0.7105	1.40348	1.35525		0.208245	0.281388
	0.7115	1.17984	0.975829	0.850505		0.044129	0.784518	0.044604		0.7115	1.40348	1.4388		0.208245	0.281388
	0.7125	1.17984	0.973164	0.850505		0.044129	0.784518	0.044604		0.7125	1.40348	1.28473		0.208245	0.281388
	0.7135	1.17984	0.973164	0.850505		0.044129	1.08584	0.044604		0.7135	1.38313	1.28473		0.208245	0.281388
	0.7145	1.17984	0.973164	0.829669		0.044129	1.08584	0.044604		0.7145	1.38313	1.2427		0.208245	0.281388
	0.7155	1.17984	0.973164	0.829669		0.044129	0.502726	0.044604		0.7155	1.38313	1.22871		0.208245	0.281388
	0.7165	1.17984	0.973164	0.829669		0.044129	0.502726	0.044604		0.7165	1.38313	1.22871		0.251387	0.281388
	0.7175	1.17984	0.973164	0.829669		0.044129	0.502726	0.044604		0.7175	1.47477	1.22871		0.251387	0.281388
	0.7185	1.17984	0.973164	0.829669		0.044129	0.502726	0.044604		0.7185	1.47477	1.22871		0.251387	0.281388
	0.7195	1.17984	0.973164	0.829669		0.044129	0.502726	0.044604		0.7195	1.40434	1.22871		0.251387	0.281388
	0.7205	1.17984	0.973164	0.829669		0.044129	0.502726	0.044604		0.7205	1.36296	1.22871		0.251387	0.281388
	0.7215	1.17984	0.936547	0.829669		0.044129	0.502726	0.044604		0.7215	1.36296	1.22871		0.251387	0.281388
	0.7225	1.17984	0.936547	0.829669		0.044129	0.502726	0.044604		0.7225	1.36296	1.22871		0.251387	0.281388
	0.7235	1.17984	0.876462	0.829669		0.044129	0.502726	0.044604		0.7235	1.36296	1.22871		0.251387	0.281388
	0.7245	1.17984	0.876462	0.829669		0.044129	0.581077	0.044604		0.7245	1.36623	1.22871		0.251387	0.281388
	0.7255	1.17984	0.876462	0.829669		0.044129	0.581077	0.044604		0.7255	1.36623	1.22871		0.251387	0.660713
	0.7265	1.17984	0.876462	0.829669		0.044129	0.581077	0.044604		0.7265	1.36623	1.22871		0.251387	0.660713
	0.7275	1.17984	0.876462	0.829669		0.044129	0.581077	0.044604		0.7275	1.36623	1.22871		0.251387	0.660713
	0.7285	1.17984	0.876462	0.829669		0.044129	0.581077	0.044604		0.7285	1.36623	1.22871		0.251387	0.660713
	0.7295	1.17984	0.876462	0.829669		0.044129	0.581077	0.044604		0.7295	1.37563	1.22871		0.251387	0.660713
	0.7305	1.17984	0.876462	0.829669		0.044129	0.581077	0.044604		0.7305	1.37563	1.22871		0.251387	0.660713
	0.7315	1.17984	0.853905	0.829669		0.044129	0.581077	0.044604		0.7315	1.38399	1.22162		0.251387	0.660713
	0.7325	1.17984	0.853905	0.85077		0.044129	0.581077	0.044604		0.7325	1.38399	1.22162		0.251387	0.660713
	0.7335	1.17984	0.853905	0.817632		0.044129	0.581077	0.044604		0.7335	1.38399	1.22162		0.251387	0.660713
	0.7345	1.24923	0.853905	0.817632		0.044129	0.295183	0.044604		0.7345	1.32207	1.22162		0.306057	0.660713
	0.7355	1.24923	0.853905	0.817632		0.044129	0.295183	0.044604		0.7355	1.32207	1.22162		0.306057	0.660713
	0.7365	1.24923	0.853905	0.817632		0.044129	0.295183	0.044604		0.7365	1.32207	1.22162		0.306057	0.660713
	0.7375	1.24923	0.819731	0.817632		0.044129	0.295183	0.044604		0.7375	1.38913	1.22162		0.306057	0.660713
	0.7385	1.24923	0.928409	0.817632		0.044129	0.295183	0.044604		0.7385	1.39603	1.22162		0.306057	0.660713
	0.7395	1.24923	0.928409	0.793243		0.044129	0.295183	0.044604		0.7395	1.39603	1.22162		0.306057	0.660713
	0.7405	1.24923	0.922121	0.793243		0.044129	0.295183	0.044604		0.7405	1.39603	1.22162		0.306057	0.660713
	0.7415	1.24923	0.922121	0.793243		0.044129	0.295183	0.044604		0.7415	1.39603	1.22162		0.306057	0.660713
	0.7425	1.24923	0.926938	0.793243		0.044129	0.295183	0.044604		0.7425	1.33523	1.22162		0.306057	0.660713
	0.7435	1.24923	0.926938	0.793243		0.044129	0.295183	0.044604		0.7435	1.33523	1.22162		0.306057	0.660713
	0.7445	1.24923	0.926938	0.753886		0.044129	0.295183	0.044604		0.7445	1.339	1.22162		0.306057	0.660713
	0.7455	1.24923	0.926938	0.753886		0.044129	0.295183	0.044604		0.7455	1.339	1.24422		0.306057	0.660713
	0.7465	1.24923	0.926938	0.753886		0.044129	0.295183	0.044604		0.7465	1.339	1.24422		0.306057	0.660713
	0.7475	1.24923	0.926938	0.753886		0.044129	0.295183	0.044604		0.7475	1.339	1.46567		0.306057	0.660713
	0.7485	1.24923	0.926938	0.755384		0.044129	0.295183	0.044604		0.7485	1.33748	1.46567		0.306057	0.660713
	0.7495	1.24923	0.926938	0.755384		0.044129	0.295183	0.044604		0.7495	1.33748	1.46567		0.306057	0.311566
	0.7505	1.24923	0.926938	0.755384		0.044129	0.295183	0.044604		0.7505	1.362	1.46567		0.306057	0.311566
	0.7515	1.24923	0.926938	0.755384		0.044129	0.295183	0.044604		0.7515	1.362	1.46567		0.306057	0.311566
	0.7525	1.24923	0.926938	0.755384		0.044129	0.295183	0.044604		0.7525	1.362	1.46567		0.306057	0.311566
	0.7535	1.24923	0.926938	0.755384		0.044129	0.295183	0.044604		0.7535	1.362	1.46567		0.306057	0.311566
	0.7545	1.24923	0.926938	0.755384		0.044129	0.295183	0.044604		0.7545	1.362	1.46567		0.306057	0.311566
	0.7555	1.24923	0.926938	0.755384		0.044129	0.295183	0.044604		0.7555	1.362	1.46567		0.306057	0.311566
	0.7565	1.24923	0.926938	0.713343		0.044129	0.295183	0.044604		0.7565	1.41702	1.46567		0.306057	0.311566
	0.7575	1.21127	0.926938	0.713343		0.044129	0.295183	0.044604		0.7575	1.41702	1.46567		0.306057	0.311566
	0.7585	1.21127	0.926938	0.713343		0.044129	0.295183	0.044604		0.7585	1.41702	1.58751		0.306057	0.311566
	0.7595	1.21127	0.926938	0.713343		0.044129	0.295183	0.044604		0.7595	1.41702	1.72952		0.306057	0.311566
	0.7605	1.21127	0.926938	0.713343		0.044129	0.295183	0.044604		0.7605	1.41702	1.72952		0.306057	0.311566
	0.7615	1.21127	0.926938	0.713343		0.044129	0.295183	0.044604		0.7615	1.41702	1.72952		0.306057	0.311566
	0.7625	1.12357	0.926938	0.713343		0.044129	0.295183	0.044604		0.7625	1.41702	1.72952		0.306057	0.311566
	0.7635	1.12357	0.926938	0.713343		0.044129	0.295183	0.044604		0.7635	1.41702	1.72952		0.328132	0.311566
	0.7645	1.12357	0.941848	0.713343		0.044129	0.295183	0.044604		0.7645	1.41702	1.61885		0.328132	0.311566
	0.7655	1.12357	0.941848	0.713343		0.044129	0.295183	0.044604		0.7655	1.41702	1.59376		0.328132	0.311566
	0.7665	1.12357	0.941848	0.749589		0.044129	0.295183	0.044604		0.7665	1.41702	1.59376		0.328132	0.311566
	0.7675	1.12357	0.941848	0.749589		0.044129	0.295183	0.044604		0.7675	1.41702	1.59376		0.328132	0.311566
	0.7685	1.12357	0.973917	0.749589		0.044129	0.295183	0.044604		0.7685	1.41702	1.64054		0.328132	0.311566
	0.7695	1.12357	0.973917	0.749589		0.044129	0.295183	0.044604		0.7695	1.41702	1.64054		0.328132	0.311566
	0.7705	1.12357	1.08935	0.765962		0.044129	0.295183	0.044604		0.7705	1.41702	1.64054		0.328132	0.311566
	0.7715	1.12357	1.04964	0.765962		0.044129	0.295183	0.044604		0.7715	1.48522	1.64054		0.328132	0.311566
	0.7725	1.20539	1.04964	0.765962		0.044129	0.295183	0.044604		0.7725	1.46188	1.64054		0.328132	0.311566
	0.7735	1.20539	1.04964	0.765962		0.044129	0.295183	0.044604		0.7735	1.46188	1.4326		0.328132	0.311566
	0.7745	1.20539	1.04964	0.765962		0.044129	0.295183	0.044604		0.7745	1.46188	1.4326		0.328132	0.311566
	0.7755	1.20539	1.04964	0.765962		0.044129	0.295183	0.044604		0.7755	1.46188	1.4326		0.328132	0.311566
	0.7765	1.20539	1.04964	0.765962		0.044129	0.295183	0.044604		0.7765	1.46188	1.4326		0.328132	0.311566
	0.7775	1.20539	1.04964	0.765962		0.044129	0.295183	0.044604		0.7775	1.46188	1.4326		0.328132	0.311566
	0.7785	1.20539	1.10541	0.765962		0.044129	0.295183	0.044604		0.7785	1.46188	1.4326		0.328132	0.311566
	0.7795	1.20539	1.10541	0.765962		0.044129	0.295183	0.044604		0.7795	1.46188	1.4326		0.328132	0.311566
	0.7805	1.20539	1.10541	0.728851		0.044129	0.295183	0.044604		0.7805	1.46188	1.4326		0.328132	0.311566
	0.7815	1.20539	1.10541	0.728851		0.044129	0.295183	0.044604		0.7815	1.46188	1.4326		0.328132	0.311566
	0.7825	1.20539	1.06035	0.728851		0.044129	0.295183	0.044604		0.7825	1.50353	1.4326		0.429986	0.311566
	0.7835	1.20539	1.06035	0.728851		0.044129	0.295183	0.044604		0.7835	1.50353	1.4326		0.429986	0.311566
	0.7845	1.20539	1.06035	0.728851		0.044129	0.295183	0.044604		0.7845	1.50353	1.4326		0.429986	0.311566
	0.7855	1.20539	1.06035	0.728851		0.044129	0.295183	0.044604		0.7855	1.50353	1.4326		0.429986	0.311566
	0.7865	1.20539	1.06035	0.728851		0.044129	0.295183	0.044604		0.7865	1.52	1.4326		0.429986	0.311566
	0.7875	1.20539	1.06035	0.728851		0.044129	0.295183	0.044604		0.7875	1.52	1.4326		0.429986	0.311566
	0.7885	1.20539	1.06035	0.728851		0.044129	0.295183	0.044604		0.7885	1.52272	1.4326		0.429986	0.311566
	0.7895	1.20539	1.06035	0.728851		0.044129	0.295183	0.044604		0.7895	1.52272	1.4326		0.429986	0.311566
	0.7905	1.18938	1.06035	0.728851		0.044129	0.295183	0.044604		0.7905	1.52272	1.4326		0.429986	0.311566
	0.7915	1.18938	1.06035	0.728851		0.044129	0.295183	0.044604		0.7915	1.52272	1.4326		0.429986	0.311566
	0.7925	1.18938	1.06035	0.728851		0.044129	0.295183	0.044604		0.7925	1.52272	1.4326		0.429986	0.311566
	0.7935	1.18938	1.06035	0.728851		0.044129	1.16525	0.044604		0.7935	1.4914	1.4326		0.429986	0.427556
	0.7945	1.18938	1.06035	0.728851		0.044129	1.16525	0.044604		0.7945	1.4914	1.4326		0.429986	0.427556
	0.7955	1.18938	1.06035	0.728851		0.044129	1.16525	0.044604		0.7955	1.43504	1.4326		0.429986	0.427556
	0.7965	1.18938	1.06035	0.728851		0.044129	1.16525	0.044604		0.7965	1.43504	1.44002		0.429986	0.427556
	0.7975	1.29548	1.06035	0.728851		0.044129	1.16525	0.044604		0.7975	1.43504	1.44002		0.429986	0.427556
	0.7985	1.29548	1.06035	0.728851		0.044129	0.31203	0.044604		0.7985	1.36895	1.46236		0.429986	0.427556
	0.7995	1.29548	1.06035	0.728851		0.044129	0.31203	0.044604		0.7995	1.36895	1.46236		0.429986	0.427556
	0.8005	1.30888	1.06035	0.728851		0.044129	0.31203	0.044604		0.8005	1.36895	1.46236		0.429986	0.427556
	0.8015	1.43545	1.06035	0.728851		0.044129	0.31203	0.044604		0.8015	1.36895	1.32088		0.429986	0.427556
	0.8025	1.43545	1.04578	0.728851		0.044129	0.31203	0.044604		0.8025	1.36895	1.32088		0.429986	0.427556
	0.8035	1.43545	1.04578	0.728851		0.044129	0.31203	0.044604		0.8035	1.36895	1.32088		0.429986	0.427556
	0.8045	1.41701	1.04578	0.728851		0.044129	0.31203	0.044604		0.8045	1.31031	1.32088		0.429986	0.427556
	0.8055	1.41701	1.04578	0.728851		0.044129	0.31203	0.044604		0.8055	1.31031	1.32088		0.429986	0.427556
	0.8065	1.41701	1.04578	0.728851		0.044129	0.31203	0.044604		0.8065	1.31031	1.32088		0.429986	0.427556
	0.8075	1.41701	1.04578	0.728851		0.044129	0.31203	0.044604		0.8075	1.31031	1.32088		0.429986	0.427556
	0.8085	1.41701	0.942265	0.728851		0.044129	0.31203	0.044604		0.8085	1.26017	1.19476		0.429986	0.427556
	0.8095	1.41701	0.942265	0.738585		0.044129	0.31203	0.044604		0.8095	1.26017	1.19476		0.429986	0.427556
	0.8105	1.41701	0.942265	0.738585		0.044129	0.31203	0.044604		0.8105	1.26017	1.19476		0.424127	0.427556
	0.8115	1.41701	0.942265	0.738585		0.044129	0.31203	0.044604		0.8115	1.18512	1.19476		0.424127	0.427556
	0.8125	1.41701	0.942265	0.738585		0.044129	0.31203	0.044604		0.8125	1.18512	1.19476		0.424127	0.427556
	0.8135	1.40744	0.942265	0.738585		0.044129	0.31203	0.044604		0.8135	1.18512	1.19476		0.675347	0.427556
	0.8145	1.40744	0.942265	0.738585		0.044129	0.31203	0.044604		0.8145	1.18512	1.07368		0.675347	0.427556
	0.8155	1.40744	0.942265	0.738585		0.044129	0.31203	0.044604		0.8155	1.20626	1.07368		0.675347	0.427556
	0.8165	1.40744	0.942265	0.738585		0.044129	0.31203	0.044604		0.8165	1.19371	1.07368		0.649134	0.427556
	0.8175	1.40744	1.52655	0.738585		0.044129	0.31203	0.044604		0.8175	1.19371	1.07368		0.649134	0.427556
	0.8185	1.40744	1.49166	0.738585		0.044129	0.31203	0.044604		0.8185	1.19371	1.07368		0.649134	0.542524
	0.8195	1.40744	1.47079	0.738585		0.044129	0.31203	0.044604		0.8195	1.19371	1.07368		0.649134	0.542524
	0.8205	1.40744	1.47079	0.738585		0.044129	0.31203	0.044604		0.8205	1.19371	1.07368		0.649134	0.542524
	0.8215	1.40744	1.47079	0.738585		0.044129	0.31203	0.044604		0.8215	1.19371	1.07368		0.649134	0.542524
	0.8225	1.40744	1.37226	0.738585		0.044129	0.31203	0.044604		0.8225	1.19371	0.966908		0.649134	0.542524
	0.8235	1.40744	1.37226	0.738585		0.044129	0.31203	0.044604		0.8235	1.19371	0.966908		0.464569	0.542524
	0.8245	1.40715	1.37226	0.738585		0.044129	0.31203	0.044604		0.8245	1.19371	0.966908		0.464569	0.542524
	0.8255	1.40715	1.37226	0.738585		0.044129	0.31203	0.044604		0.8255	1.19371	0.966908		0.464569	0.542524
	0.8265	1.40715	1.53893	0.738585		0.044129	0.31203	0.044604		0.8265	1.19371	0.966908		0.464569	0.542524
	0.8275	1.40715	1.53893	0.738585		0.044129	0.31203	0.044604		0.8275	1.19371	0.966908		0.464569	0.542524
	0.8285	1.40715	1.53893	0.738585		0.044129	0.31203	0.044604		0.8285	1.19371	0.966908		0.464569	0.542524
	0.8295	1.40715	1.07317	0.738585		0.044129	0.31203	0.044604		0.8295	1.19371	0.966908		0.464569	0.542524
	0.8305	1.49586	1.07317	0.738585		0.044129	0.31203	0.044604		0.8305	1.19371	0.966908		0.464569	0.542524
	0.8315	1.49586	1.07317	0.738585		0.044129	0.31203	0.044604		0.8315	1.19371	0.966908		0.464569	0.542524
	0.8325	1.49586	1.10449	0.738585		0.044129	0.31203	0.044604		0.8325	1.19371	0.966908		0.464569	0.542524
	0.8335	1.49586	1.10449	0.738585		0.044129	0.31203	0.044604		0.8335	1.19299	0.966908		0.560166	0.542524
	0.8345	1.49586	1.10449	0.738585		0.044129	0.31203	0.044604		0.8345	1.15692	0.966908		0.454285	0.542524
	0.8355	1.49586	1.26685	0.773549		0.044129	0.31203	0.044604		0.8355	1.15692	0.966908		0.454285	0.825059
	0.8365	1.49586	1.26685	0.773549		0.044129	0.31203	0.044604		0.8365	1.15692	0.966908		0.454285	0.825059
	0.8375	1.49586	1.26685	0.773549		0.044129	0.31203	0.044604		0.8375	1.05199	0.966908		0.454285	0.825059
	0.8385	1.49586	1.26685	0.7846		0.044129	0.31203	0.044604		0.8385	1.05199	0.966908		0.454285	0.825059
	0.8395	1.49586	1.26685	0.7846		0.044129	0.31203	0.044604		0.8395	1.05199	0.966908		0.454285	0.825059
	0.8405	1.49586	1.26685	0.7846		0.044129	0.31203	0.044604		0.8405	1.05199	0.966908		0.454285	0.825059
	0.8415	1.49586	1.26685	0.7846		0.044129	0.31203	0.044604		0.8415	1.05199	0.966908		0.454285	0.825059
	0.8425	1.49586	1.26685	0.7846		0.044129	0.31203	0.044604		0.8425	1.05199	0.966908		0.467364	0.825059
	0.8435	1.54451	1.26685	0.7846		0.044129	0.31203	0.044604		0.8435	1.05199	0.966908		0.467364	0.825059
	0.8445	1.54451	1.26685	0.7846		0.044129	0.31203	0.044604		0.8445	1.05199	1.00113		0.467364	0.825059
	0.8455	1.54451	1.26685	0.7846		0.044129	0.31203	0.044604		0.8455	1.05199	1.00113		0.467364	0.825059
	0.8465	1.54451	1.4621	0.7846		0.044129	0.31203	0.044604		0.8465	1.05199	1.00113		0.467364	0.825059
	0.8475	1.57667	1.4621	0.7846		0.044129	0.31203	0.044604		0.8475	1.05199	1.00113		0.467364	0.825059
	0.8485	1.4652	1.4621	0.7846		0.044129	0.31203	0.044604		0.8485	1.05199	1.00113		0.467364	0.825059
	0.8495	1.4652	1.4621	0.7846		0.044129	0.31203	0.044604		0.8495	1.05199	1.00113		0.467364	0.825059
	0.8505	1.4652	1.4621	0.7846		0.044129	0.31203	0.044604		0.8505	1.05199	1.00113		0.467364	0.825059
	0.8515	1.4652	1.4621	0.7846		0.044129	0.31203	0.044604		0.8515	1.00948	1.00113		0.467364	0.825059
	0.8525	1.4652	1.4621	0.7846		0.044129	0.31203	0.044604		0.8525	1.00948	1.00113		0.467364	0.825059
	0.8535	1.4652	1.53086	0.7846		0.044129	0.31203	0.044604		0.8535	1.00948	1.00113		0.467364	0.825059
	0.8545	1.4652	1.53086	0.7846		0.044129	0.31203	0.044604		0.8545	1.00948	1.00113		0.467364	0.825059
	0.8555	1.4652	1.53086	0.7846		0.044129	0.31203	0.044604		0.8555	1.00948	1.00113		0.467364	1.49978
	0.8565	1.4652	1.53086	0.7846		0.044129	0.31203	0.044604		0.8565	1.00948	1.00113		0.467364	1.49978
	0.8575	1.4652	1.53086	0.7846		0.044129	0.31203	0.044604		0.8575	1.00948	1.09289		0.467364	1.49978
	0.8585	1.4652	1.53086	0.7846		0.044129	0.31203	0.044604		0.8585	1.00948	1.13454		0.467364	1.49978
	0.8595	1.4652	1.53086	0.7846		0.044129	0.31203	0.044604		0.8595	1.00948	1.13454		0.422672	1.49978
	0.8605	1.4652	1.53086	0.7846		0.044129	0.31203	0.044604		0.8605	1.07233	1.13454		0.422672	1.49978
	0.8615	1.4652	1.53086	0.797424		0.044129	0.31203	0.044604		0.8615	1.07233	1.13454		0.422672	1.58287
	0.8625	1.4652	1.53086	0.889877		0.044129	0.31203	0.044604		0.8625	1.07233	1.13454		0.422672	1.58287
	0.8635	1.4652	1.53086	0.889877		0.044129	0.31203	0.044604		0.8635	1.07233	1.13454		0.422672	0.474105
	0.8645	1.4652	1.53086	0.917823		0.044129	0.31203	0.044604		0.8645	1.09433	1.21513		0.422672	0.474105
	0.8655	1.4652	1.53086	0.917823		0.044129	0.31203	0.044604		0.8655	1.09433	1.21513		0.422672	0.474105
	0.8665	1.4652	1.53086	0.923336		0.044129	0.31203	0.044604		0.8665	1.09433	1.21513		0.422672	0.474105
	0.8675	1.4652	1.30609	0.923336		0.044129	0.31203	0.044604		0.8675	1.09433	1.21513		0.422672	0.474105
	0.8685	1.4652	1.51585	0.923336		0.044129	0.31203	0.044604		0.8685	1.09433	1.21513		0.422672	0.474105
	0.8695	1.49291	1.51585	0.988561		0.044129	0.31203	0.044604		0.8695	1.09433	1.21513		0.422672	0.474105
	0.8705	1.49291	1.51585	0.988561		0.044129	0.31203	0.044604		0.8705	1.09433	1.21513		0.422672	0.474105
	0.8715	1.49291	1.51585	0.971629		0.044129	0.31203	0.044604		0.8715	1.09433	1.21513		0.422672	0.474105
	0.8725	1.49291	1.49355	0.971629		0.044129	0.31203	0.044604		0.8725	1.09433	1.21513		0.422672	0.474105
	0.8735	1.42253	1.37428	0.971629		0.044129	0.31203	0.044604		0.8735	1.09433	1.21513		0.422672	0.474105
	0.8745	1.42253	1.83914	0.971629		0.044129	0.31203	0.044604		0.8745	1.09433	1.21513		0.422672	0.474105
	0.8755	1.42253	1.88481	0.971629		0.044129	0.31203	0.044604		0.8755	1.09433	1.21513		0.422672	0.474105
	0.8765	1.42253	1.88481	0.971629		0.044129	0.31203	0.044604		0.8765	1.09433	1.21513		0.422672	0.474105
	0.8775	1.42253	1.88481	0.971629		0.044129	0.31203	0.044604		0.8775	1.11801	1.21513		0.422672	0.474105
	0.8785	1.42253	1.94841	0.971629		0.044129	0.31203	0.044604		0.8785	1.11801	1.21513		0.422672	0.474105
	0.8795	1.42253	1.97409	0.971629		0.044129	0.31203	0.044604		0.8795	1.13999	1.21513		0.422672	0.474105
	0.8805	1.42253	1.97409	0.971629		0.044129	0.31203	0.044604		0.8805	1.13999	1.21513		0.422672	0.474105
	0.8815	1.42253	1.97409	0.971629		0.044129	0.31203	0.044604		0.8815	1.13999	1.21513		0.422672	0.474105
	0.8825	1.42253	1.67565	0.971629		0.044129	0.31203	0.044604		0.8825	1.13999	1.21513		0.422672	0.474105
	0.8835	1.42253	1.69458	0.971629		0.044129	0.31203	0.044604		0.8835	1.13999	1.21513		0.422672	0.474105
	0.8845	1.41493	1.61485	0.971629		0.044129	0.31203	0.044604		0.8845	1.13999	1.21513		0.422672	0.474105
	0.8855	1.41493	1.61485	0.971629		0.044129	0.31203	0.044604		0.8855	1.13999	1.21513		0.422672	0.474105
	0.8865	1.41493	1.61485	0.971629		0.044129	0.31203	0.044604		0.8865	1.13999	1.21513		0.422672	0.474105
	0.8875	1.41493	1.61485	0.971629		0.044129	0.31203	0.044604		0.8875	1.13999	1.21513		0.422672	0.474105
	0.8885	1.41493	1.33968	0.971629		0.044129	0.31203	0.044604		0.8885	1.13999	1.21513		0.422672	0.474105
	0.8895	1.41493	1.41097	0.971629		0.044129	0.31203	0.044604		0.8895	1.13999	1.21513		0.422672	0.474105
	0.8905	1.41493	1.41097	0.971629		0.044129	0.31203	0.044604		0.8905	1.27155	1.21513		0.422672	0.474105
	0.8915	1.41493	1.41097	0.971629		0.044129	0.31203	0.044604		0.8915	1.27155	1.42564		0.422672	0.474105
	0.8925	1.41493	1.41097	0.971629		0.044129	0.31203	0.044604		0.8925	1.27155	1.42564		0.422672	0.474105
	0.8935	1.41493	1.41097	0.971629		0.044129	0.31203	0.044604		0.8935	1.27155	1.42564		0.422672	0.474105
	0.8945	1.41493	1.41097	0.971629		0.044129	0.31203	0.044604		0.8945	1.27155	1.42564		0.422672	0.474105
	0.8955	1.41493	1.41097	0.971629		0.044129	0.31203	0.044604		0.8955	1.27155	1.59152		0.422672	0.331711
	0.8965	1.47256	1.41097	0.971629		0.044129	0.31203	0.044604		0.8965	1.27155	1.59152		0.556233	0.331711
	0.8975	1.47256	1.41097	0.971629		0.044129	0.31203	0.044604		0.8975	1.27155	1.59152		0.556233	0.331711
	0.8985	1.51116	1.41097	1.03559		0.044129	0.31203	0.044604		0.8985	1.27155	1.59152		0.556233	0.331711
	0.8995	1.51116	1.41097	1.03559		0.044129	0.31203	0.044604		0.8995	1.27155	1.66775		0.556233	0.331711
	0.9005	1.51116	1.41097	1.03559		0.044129	0.31203	0.044604		0.9005	1.27155	1.68818		0.556233	0.331711
	0.9015	1.51116	1.21308	1.03559		0.044129	0.31203	0.044604		0.9015	1.27155	1.68818		0.556233	0.331711
	0.9025	1.51116	1.21308	1.03559		0.044129	0.31203	0.044604		0.9025	1.27155	1.86708		0.556233	0.331711
	0.9035	1.51116	1.21308	1.04307		0.044129	0.31203	0.044604		0.9035	1.27155	1.86708		0.556233	0.331711
	0.9045	1.51116	1.21308	1.04307		0.044129	0.31203	0.044604		0.9045	1.27155	1.86708		0.556233	0.331711
	0.9055	1.51116	1.21308	1.04307		0.044129	0.31203	0.044604		0.9055	1.27155	1.86708		0.556233	0.331711
	0.9065	1.51116	1.21308	1.04307		0.044129	0.31203	0.044604		0.9065	1.37869	1.86708		0.556233	0.331711
	0.9075	1.51116	1.21308	1.04307		0.044129	0.31203	0.044604		0.9075	1.37869	1.86708		0.556233	0.331711
	0.9085	1.51116	1.21308	1.04307		0.044129	0.31203	0.044604		0.9085	1.37869	1.86708		0.556233	0.331711
	0.9095	1.51116	1.2581	1.04307		0.044129	0.31203	0.044604		0.9095	1.38447	1.86708		0.556233	0.331711
	0.9105	1.51116	1.2581	1.04307		0.044129	0.31203	0.044604		0.9105	1.38447	1.86708		0.556233	0.331711
	0.9115	1.51116	1.2062	1.04307		0.044129	0.31203	0.044604		0.9115	1.38447	1.86708		0.556233	0.331711
	0.9125	1.51116	1.28359	1.04307		0.044129	0.31203	0.044604		0.9125	1.38447	1.86708		0.556233	0.331711
	0.9135	1.51116	1.28359	1.04307		0.044129	0.31203	0.044604		0.9135	1.38447	1.84561		0.556233	0.331711
	0.9145	1.51116	1.4157	1.04307		0.044129	0.31203	0.044604		0.9145	1.38447	1.84561		0.556233	0.331711
	0.9155	1.51116	1.4157	1.04307		0.044129	0.31203	0.044604		0.9155	1.38447	1.84561		0.556233	0.331711
	0.9165	1.51116	1.4157	1.04307		0.044129	0.31203	0.044604		0.9165	1.38447	1.84561		0.556233	0.331711
	0.9175	1.6347	1.49461	1.04307		0.044129	0.31203	0.044604		0.9175	1.38447	1.84561		0.556233	0.331711
	0.9185	1.6347	1.49461	1.04307		0.044129	0.31203	0.044604		0.9185	1.3435	1.84561		0.556233	0.331711
	0.9195	1.6347	1.49461	1.04307		0.044129	0.31203	0.044604		0.9195	1.37591	1.84561		0.556233	0.331711
	0.9205	1.6347	1.49461	1.04307		0.044129	0.31203	0.044604		0.9205	1.43984	1.84561		0.556233	0.331711
	0.9215	1.6347	1.68601	1.04307		0.044129	0.31203	0.044604		0.9215	1.53582	1.98083		0.556233	0.331711
	0.9225	1.6347	1.68601	1.04307		0.044129	0.31203	0.044604		0.9225	1.53582	1.98083		0.556233	0.331711
	0.9235	1.6347	1.68601	1.04307		0.044129	0.31203	0.044604		0.9235	1.53582	1.98083		0.475548	0.331711
	0.9245	1.6347	1.68601	1.04307		0.044129	0.31203	0.044604		0.9245	1.53582	2.03111		0.475548	0.331711
	0.9255	1.6347	1.68601	1.04307		0.044129	0.31203	0.044604		0.9255	1.53582	2.03111		0.475548	0.331711
	0.9265	1.6347	1.68601	1.04307		0.044129	0.31203	0.044604		0.9265	1.52296	2.03111		0.475548	0.331711
	0.9275	1.6347	1.68601	1.04307		0.044129	0.31203	0.044604		0.9275	1.52296	2.03111		0.475548	0.331711
	0.9285	1.6347	1.68601	1.04307		0.044129	0.31203	0.044604		0.9285	1.52296	2.03111		0.475548	0.331711
	0.9295	1.6347	1.68601	0.987043		0.044129	0.31203	0.044604		0.9295	1.52296	2.03111		0.475548	0.331711
	0.9305	1.6347	1.68601	0.987043		0.044129	0.31203	0.044604		0.9305	1.52296	2.03111		0.475548	0.331711
	0.9315	1.6347	1.68601	0.987043		0.044129	0.31203	0.044604		0.9315	1.52562	2.03111		0.475548	0.331711
	0.9325	1.6347	1.68601	0.987043		0.044129	0.31203	0.044604		0.9325	1.52562	1.97187		0.475548	0.331711
	0.9335	1.6347	1.78949	0.987043		0.044129	0.31203	0.044604		0.9335	1.52562	1.97187		0.475548	0.331711
	0.9345	1.6347	1.72953	0.987043		0.044129	0.31203	0.044604		0.9345	1.52562	1.97187		0.475548	0.331711
	0.9355	1.6347	1.72953	1.00509		0.044129	0.31203	0.044604		0.9355	1.52562	1.97187		0.475548	0.331711
	0.9365	1.6347	1.72953	1.00509		0.044129	0.31203	0.044604		0.9365	1.52562	2.07546		0.475548	0.331711
	0.9375	1.6347	1.72953	1.00509		0.044129	0.31203	0.044604		0.9375	1.52562	2.07546		0.475548	0.331711
	0.9385	1.6347	1.72953	1.00509		0.044129	0.31203	0.044604		0.9385	1.52562	2.07546		0.475548	0.331711
	0.9395	1.6347	1.72953	1.00509		0.044129	0.31203	0.044604		0.9395	1.52562	2.07546		0.475548	0.331711
	0.9405	1.6347	1.72953	1.00509		0.044129	0.31203	0.044604		0.9405	1.52562	2.04469		0.525935	0.331711
	0.9415	1.6347	1.72953	1.00509		0.044129	0.31203	0.044604		0.9415	1.52562	2.04469		0.525935	0.331711
	0.9425	1.6347	1.72953	1.01456		0.044129	0.31203	0.044604		0.9425	1.52562	2.04469		0.525935	0.331711
	0.9435	1.6347	1.74699	1.01456		0.044129	0.31203	0.044604		0.9435	1.52562	2.04469		0.525935	0.331711
	0.9445	1.6347	1.74699	1.09804		0.044129	0.31203	0.044604		0.9445	1.51995	2.04469		0.525935	0.331711
	0.9455	1.6347	1.74699	1.09804		0.044129	0.437323	0.044604		0.9455	1.51995	2.04469		0.525935	0.331711
	0.9465	1.6347	1.6957	1.09804		0.044129	0.437323	0.044604		0.9465	1.51995	2.04469		0.525935	0.331711
	0.9475	1.6347	1.6957	1.09804		0.044129	0.437323	0.044604		0.9475	1.51995	2.04469		0.554958	0.331711
	0.9485	1.6347	1.6957	1.09804		0.044129	0.437323	0.044604		0.9485	1.51995	2.04469		0.554958	0.331711
	0.9495	1.6347	1.6957	1.09804		0.044129	0.437323	0.044604		0.9495	1.51995	2.27952		0.554958	0.6679
	0.9505	1.6347	1.6957	1.09804		0.044129	0.437323	0.044604		0.9505	1.55429	2.27952		0.554958	0.6679
	0.9515	1.6347	1.6957	1.09804		0.044129	0.437323	0.044604		0.9515	1.69728	2.27952		0.554958	0.6679
	0.9525	1.6347	1.6957	1.09804		0.044129	0.609546	0.044604		0.9525	1.69728	2.27952		0.691032	0.6679
	0.9535	1.6347	1.70264	1.09804		0.044129	0.609546	0.044604		0.9535	1.69728	2.27952		0.691032	0.6679
	0.9545	1.6347	1.70264	1.09804		0.044129	0.609546	0.044604		0.9545	1.69728	2.27952		0.691032	0.6679
	0.9555	1.6347	1.70264	1.09804		0.044129	0.609546	0.044604		0.9555	1.69728	2.27952		0.691032	0.6679
	0.9565	1.6347	1.70264	1.02541		0.044129	0.609546	0.044604		0.9565	1.69728	2.27952		0.691032	0.6679
	0.9575	1.6347	1.63005	1.02541		0.044129	0.609546	0.044604		0.9575	1.65183	2.27952		0.691032	0.6679
	0.9585	1.6347	1.63005	1.02541		0.044129	0.609546	0.044604		0.9585	1.65183	2.27952		0.691032	0.6679
	0.9595	1.6347	1.63005	1.02541		0.044129	0.609546	0.044604		0.9595	1.65183	2.27952		0.691032	0.6679
	0.9605	1.6347	1.63005	1.02541		0.044129	0.609546	0.044604		0.9605	1.65183	2.27952		0.691032	0.6679
	0.9615	1.74396	1.68841	1.02541		0.044129	0.609546	0.044604		0.9615	1.65183	2.27952		0.691032	0.6679
	0.9625	1.74396	1.68841	1.02541		0.044129	0.609546	0.044604		0.9625	1.6531	2.27952		0.691032	0.6679
	0.9635	1.74396	1.68841	1.02541		0.044129	0.609546	0.044604		0.9635	1.6531	2.13044		0.691032	0.6679
	0.9645	1.74396	1.68841	1.02541		0.044129	0.609546	0.044604		0.9645	1.6531	2.13044		0.821714	0.6679
	0.9655	1.74396	1.94494	0.960957		0.044129	0.609546	0.044604		0.9655	1.6531	2.13044		0.821714	0.6679
	0.9665	1.74396	2.24565	0.960957		0.044129	0.609546	0.044604		0.9665	1.6531	2.34312		0.821714	0.6679
	0.9675	1.94607	2.24565	0.960957		0.044129	0.609546	0.044604		0.9675	1.6531	2.34312		0.821714	0.6679
	0.9685	1.94607	2.24565	0.960957		0.044129	0.609546	0.044604		0.9685	1.6531	2.34312		0.821714	0.6679
	0.9695	1.94607	2.31162	0.960957		0.044129	0.609546	0.044604		0.9695	1.6531	2.34312		0.821714	0.6679
	0.9705	1.94607	2.31162	0.960957		0.044129	0.609546	0.044604		0.9705	1.71919	2.34312		0.821714	0.6679
	0.9715	1.94607	2.31162	0.960957		0.044129	0.609546	0.044604		0.9715	1.71919	2.34312		0.821714	1.81842
	0.9725	1.94607	2.31162	1.1632		0.044129	0.609546	0.044604		0.9725	1.74518	2.34312		0.821714	1.81842
	0.9735	1.94607	2.31162	1.1632		0.044129	0.609546	0.044604		0.9735	1.74518	2.34312		0.821714	1.81842
	0.9745	1.94607	2.31162	1.1632		0.044129	0.609546	0.044604		0.9745	1.74518	2.34312		0.821714	1.81842
	0.9755	1.94607	2.31162	1.1632		0.044129	0.609546	0.044604		0.9755	1.74518	2.34312		0.821714	1.81842
	0.9765	1.94607	2.31162	1.11099		0.044129	0.609546	0.044604		0.9765	1.74518	2.32717		0.821714	1.81842
	0.9775	1.94607	2.31162	1.11099		0.044129	0.609546	0.044604		0.9775	1.74518	2.41457		0.821714	1.81842
	0.9785	1.94607	2.31162	1.11099		0.044129	0.609546	0.044604		0.9785	1.74518	2.77184		0.821714	1.81842
	0.9795	2.27929	2.62034	1.11099		0.044129	0.609546	0.044604		0.9795	1.85924	2.77184		0.821714	0.680795
	0.9805	2.27929	2.62034	1.11099		0.044129	0.609546	0.044604		0.9805	1.85924	2.77184		0.930928	0.680795
	0.9815	2.27929	2.62034	1.11099		0.044129	0.609546	0.044604		0.9815	2.09151	2.77184		0.930928	0.680795
	0.9825	2.27929	2.42075	1.11099		0.044129	0.609546	0.044604		0.9825	2.09151	3.08607		1.0855	0.680795
	0.9835	2.27929	2.74759	1.11099		0.044129	0.609546	0.044604		0.9835	2.20916	3.08607		1.0855	0.680795
	0.9845	2.27929	3.04427	1.11099		0.044129	0.609546	0.044604		0.9845	2.20916	3.26631		1.0855	10.6893
	0.9855	3.04341	3.44111	1.11099		0.044129	0.609546	0.044604		0.9855	2.20916	3.26631		1.0855	10.6893
	0.9865	3.2875	3.66072	1.11099		0.044129	0.609546	0.044604		0.9865	2.20916	3.57303		1.11428	10.6893
	0.9875	3.2875	3.66072	1.00425		0.044129	0.609546	0.044604		0.9875	2.28016	4.11996		1.01001	10.6893
	0.9885	3.2875	3.66072	1.00425		0.044129	0.609546	0.044604		0.9885	2.28016	4.11996		1.01001	10.6893
	0.9895	3.2875	3.66072	1.00425		0.044129	0.609546	0.044604		0.9895	2.28016	4.11996		1.01001	10.6893
	0.9905	3.2875	3.8505	1.00425		0.044129	0.609546	0.044604		0.9905	2.3162	4.11996		1.01001	10.6893
	0.9915	4.02116	3.8505	1.00425		0.044129	0.609546	0.044604		0.9915	2.45023	4.11996		1.01001	10.6893
	0.9925	4.46194	3.8505	1.00425		0.044129	1.14404	0.044604		0.9925	2.45023	4.11996		1.01001	10.6893
	0.9935	4.72435	3.8505	1.00425		0.044129	1.14404	0.044604		0.9935	2.45023	4.26277		1.31007	10.6893
	0.9945	4.72435	3.8505	1.00425		0.044129	1.14404	0.044604		0.9945	2.45023	4.26277		1.31007	10.6893
	0.9955	4.72435	4.3443	1.00425		0.044129	1.14404	0.044604		0.9955	2.45023	4.70854		1.31007	10.6893
	0.9965	4.72435	4.3443	0.991718		0.044129	1.14404	0.044604		0.9965	2.63793	5.17274		1.48219	10.6893
	0.9975	4.72435	4.3443	0.865659		0.044129	1.14404	0.042919		0.9975	2.63793	5.59003		1.48219	10.6893
	0.9985	4.72435	5.32087	0.865659		0.044129	3.38854	0.042919		0.9985	2.73959	5.59003		1.48219	10.6893
	0.9995	4.72435	6.03052			0.044129	3.98815	0.042919		0.9995	2.75715	5.93937		1.48219	10.6893
	1.0005	4.72435	6.82084			0.044129	3.98815	0.042919		1.0005	2.75715	5.93937		1.35609	23.1481
											2.75715	5.93937		1.35609	70.5578
											2.75715	5.93937		1.35609	73.0161

## Sheet: H
	DATA						STATISTICS
	Pre-Inspiratory Neuron Mean Burst spiking						Two-Way RM ANOVA
	Oprm1+ (n=9)						Source of Variation	% of total variation	P value	P value summary	Significant?
	Baseline	50nM	100nM	200nM	300nM		Treatment Factor	16.4	<0.0001	****	Yes
	1	0.857239	0.787103	0.766121	0.8464		Group Factor	5.441	0.1865	ns	No
	1	0.841842	0.85403	0.840829	0.748016
	1	1.02276	0.999237	0.943266	0.671683		Bonferroni's multiple comparisons tests Oprm1+ vs. Oprm1-
	1	0.964343	0.837766	0.618031	0.549777		Treatment	mean diff.	95.00% CI of diff.	Significant?	Summary	Adjusted P Value
	1	0.980162	0.910864	0.758215	0.704896		Baseline	0	-0.2175 to 0.2175	No	ns	>0.9999
	1	0.776066	0.633575	0.53187	0.501812		50nM	-0.05863	-0.2762 to 0.1589	No	ns	>0.9999
	1	0.842909	0.829326	0.593108	0.561688		100nM	-0.1068	-0.3243 to 0.1108	No	ns	0.9926
	1	1.01675	0.849117	0.937677	1.00072		200nM	-0.1112	-0.3288 to 0.1063	No	ns	0.9036
	1	0.974455	1.05739	0.894996	0.996204		300nM	-0.1514	-0.3689 to 0.06618	No	ns	0.3494
	Oprm1- (n=8)
	Baseline	50nM	100nM	200nM	300nM
	1	1.01034	0.938603	0.609821	0.596948
	1	0.909016	0.994392	0.948198	0.86371
	1	0.944486	0.880706	1.01058	1.08274
	1	0.975035	0.869433	0.899935	0.823477
	1	1.14567	1.15577	1.00398	0.8648
	1	0.895484	0.797102	0.815311	0.808701
	1	0.892833	0.67631	0.554871	0.46588
	1	1.05309	1.43827	1.16623	1.55466
	Inspiratory Neuron Mean Burst spiking						Two-Way RM ANOVA
	Oprm1+ (n=4)						Source of Variation	% of total variation	P value	P value summary	Significant?
	Baseline	50nM	100nM	200nM	300nM		Treatment Factor	43	0.0001	***	Yes
	1	1.05407	0.957077	0.737401	0.574423		Group Factor	2.55	0.4137	ns	No
	1	1.04383	1.0275	0.634801	0.302369
	1	0.741918	0.846669	0.626432	0.76286		Bonferroni's multiple comparisons tests Oprm1+ vs. Oprm1-
	1	1.14439	1.2648	1.06558	0.807985		Treatment	mean diff.	95.00% CI of diff.	Significant?	Summary	Adjusted P Value
							Baseline	0
	Oprm1- (n=6)						50nM	0.09411	-0.3151 to 0.5033	No	ns	>0.9999
	Baseline	50nM	100nM	200nM	300nM		100nM	0.2109	-0.2297 to 0.6515	No	ns	0.4586
	1	0.831196	0.834392	0.665675	0.500762		200nM	0.06865	-0.4299 to 0.5672	No	ns	>0.9999
	1	0.798168	0.737586	0.279411	0.422195		300nM	-0.02707	-0.5560 to 0.5018	No	ns	>0.9999
	1	0.789099	0.726695	0.7515	0.68825
	1	0.917218	0.75476	0.612219	0.457737
	1	0.973252	0.930744	0.844065	0.763528
	1	1.10275	0.894601	1.03155	1.0014
