# Supplementary material for: Dual mechanisms of opioid-induced respiratory depression in the inspiratory rhythm-generating network
Source: eLife. 2021 Aug 17;10:e67523. doi: 10.7554/eLife.67523 (PMC8390004; doi:10.7554/eLife.67523)
Supplement: Figure 3—figure supplement 1—source data 1. [file elife-67523-fig3-figsupp1-data1.xlsx]

## Sheet: A
DATA										STATISTICS
Burst Frequency (norm to baseline)
WT					HET					Two-way RM ANOVA
Baseline	50 nM	100 nM	200 nM		Baseline	50 nM	100 nM	200 nM		Source of Variation	% of total variation	P value	Summary	Significant?
1	0.983259	0.46073	0.369933		1	0.75	0.541667	0.333333		Treatment Factor	45.84	<0.0001	****	Yes
1	1.39163	1.23951	0.919539		1	0.647059	0.235294	0.0588235		Group Factor	0.3128	0.4715	ns	No
1	0.61051	0.096231	0		1	0.851852	0.555556	0.333333
1	1.01497	0.881718	0.618536		1	0.352941	0.147059	0		Bonferroni's multiple comparisons test
1	1.13986	0.439061	0		1	0.655172	0.551724	0.482759		WT vs HET	Mean Diff.	95.00% CI of diff.	Summary	Adjusted P Value
1	0.861654	0.679727	0.310547		1	0.869565	0.695652	0.565217		Baseline	0	-0.1913 to 0.1913	ns	>0.9999
1	1.3177	1.24875	1.18062		1	0.888889	0.722222	0.555556		50 nM	0.01203	-0.1793 to 0.2033	ns	>0.9999
1	1.01755	0.643935	0.335269		1	0.37037	0.111111	0		100nM	-0.0454	-0.2367 to 0.1459	ns	>0.9999
1	0.660555	0.379378	0		1	0.352941	0.235294	0		200nM	-0.1371	-0.3284 to 0.05424	ns	0.2901
1	0.581233	0.73379	0		1	0.580645	0.354839	0.193548
1	1.43094	0.569396	0		1	0.904762	0.571429	0.285714
1	1.13769	0.974496	1.14628		1	0.842105	0.684211	0.368421
1	0.475014	0	0		1	0.789474	0.578947	0.526316
1	1.01522	0.896233	0.829043		1	0.590909	0.431818	0.431818
1	0.589843	0	0		1	0.902439	0.902439	0.780488
1	0.542335	0.473169	0		1	0.551724	0.344828	0.0689655
1	0.894013	0.315477	0		1	0.842105	0.684211	0.263158
1	0.958351	1.08133	0.413211		1	0.8	0.466667	0.133333
1	0.777485	0.250381	0		1	0.769231	0.589744	0.384615
1	0	0	0		1	0.589744	0.333333	0.179487
1	0	0	0		1	0.914286	0.885714	0.857143
1	0	0	0		1	0.72973	0.378378	0.189189
1	0.923038	1.6502	0		1	0.954545	0.863636	0.772727
1	0.18731	0	0		1	0.785714	0.678571	0.392857
1	0.45633	0	0		1	0.875	0.6875	0.5
1	0.498928	0.068861	0		1	0.804878	0.780488	0.634146
					1	0.757576	0.454545	0.242424
					1	0.847826	0.630435	0.521739
					1	0.827586	0.793103	0.655172
					1	0.7	0.566667	0.466667

## Sheet: B
DATA			STATISTICS
Frequency relative to baseline in 200nM DAMGO			Frequency (norm to baseline)
Previously exposed	Naïve		unpaired t test (two-tailed)
0.333333	0.452274		P value	0.6297
0.0588235	0.734518		Summary	ns
0.333333	0.694529		Significant?	No
0	0.315425		t, df	t=0.4856, df=43
0.482759	0.335504
0.565217	0
0.555556	0
0	0
0	0.559241
0.193548	0
0.285714	0
0.368421	1.1599
0.526316	0
0.431818	0.67016
0.780488	0
0.0689655
0.263158
0.133333
0.384615
0.179487
0.857143
0.189189
0.772727
0.392857
0.5
0.634146
0.242424
0.521739
0.655172
0.466667
