# Supplementary material for: Dual mechanisms of opioid-induced respiratory depression in the inspiratory rhythm-generating network
Source: eLife. 2021 Aug 17;10:e67523. doi: 10.7554/eLife.67523 (PMC8390004; doi:10.7554/eLife.67523)
Supplement: Figure 3—figure supplement 2—source data 1. [file elife-67523-fig3-figsupp2-data1.xlsx]

## Sheet: A
DATA						STATISTICS
integrated IBI (norm to baseline)	burst frequency (norm to baseline)					Linear Regression Analysis
	50nM	100nM	200nM	300nM			50nM	100nM	200nM	300nM
0.795228	0.75					Best-fit values
0.816176	0.647059					Slope	0.5497	0.7151	0.7324	0.5325
0.929252	0.851852					Y-intercept	0.2549	-0.06311	-0.2346	-0.1728
0.954697	0.352941					X-intercept	-0.4636	0.08826	0.3203	0.3244
0.872973	0.655172					1/slope	1.819	1.398	1.365	1.878
0.776746	0.869565
0.935728	0.888889					Std. Error
0.874478	0.37037					Slope	0.3349	0.3097	0.3489	0.2982
0.685096	0.352941					Y-intercept	0.295	0.2674	0.2922	0.2462
0.873125	0.580645
0.830689	0.904762					95% Confidence Intervals
0.840265	0.842105					Slope	-0.1363 to 1.236	0.08062 to 1.349	0.01758 to 1.447	-0.07824 to 1.143
0.964401	0.789474					Y-intercept	-0.3494 to 0.8591	-0.6109 to 0.4847	-0.8332 to 0.3641	-0.6771 to 0.3316
0.827247	0.590909					X-intercept	-infinity to 0.2839	-5.957 to 0.4569	-20.38 to 0.5851	-infinity to 0.6059
0.759295	0.902439
0.693167	0.551724					Goodness of Fit
0.829421	0.842105					R squared	0.08779	0.1599	0.1359	0.1023
0.736748	0.8					Sy.x	0.1627	0.1989	0.2273	0.2076
0.83967	0.769231
0.832706	0.589744					Is slope significantly non-zero?
0.987108	0.914286					F	2.695	5.33	4.405	3.19
0.902206	0.72973					DFn, DFd	1, 28	1, 28	1, 28	1, 28
0.948659	0.954545					P value	0.1119	0.0286	0.045	0.0849
0.980232	0.785714					Deviation from zero?	Not Significant	Significant	Significant	Not Significant
0.958943	0.875
0.966479	0.804878					Equation	Y = 0.5497*X + 0.2549	Y = 0.7151*X - 0.06311	Y = 0.7324*X - 0.2346	Y = 0.5325*X - 0.1728
0.989802	0.757576
0.932153	0.847826
0.982747	0.827586
0.97569	0.7
0.760557		0.541667
0.783824		0.235294
0.817687		0.555556
0.889006		0.147059
0.863763		0.551724
0.675468		0.695652
0.940746		0.722222
0.916639		0.111111
0.611195		0.235294
0.825259		0.354839
0.858348		0.571429
0.824354		0.684211
1.02072		0.578947
0.737504		0.431818
0.897295		0.902439
0.573392		0.344828
0.943897		0.684211
0.633428		0.466667
0.776416		0.589744
0.818671		0.333333
0.967117		0.885714
0.904712		0.378378
0.948258		0.863636
1.03779		0.678571
0.941605		0.6875
0.926775		0.780488
0.997754		0.454545
0.914946		0.630435
0.922191		0.793103
0.933662		0.566667
0.701566			0.333333
0.794118			0.0588235
0.812245			0.333333
0.968212			0
0.824198			0.482759
0.69191			0.565217
0.946898			0.555556
0.879566			0
0.56134			0
0.837386			0.193548
0.838187			0.285714
0.925834			0.368421
0.989482			0.526316
0.715068			0.431818
0.875073			0.780488
0.629525			0.0689655
0.801681			0.263158
0.499046			0.133333
0.720331			0.384615
0.819724			0.179487
0.918341			0.857143
0.88451			0.189189
0.896618			0.772727
0.957918			0.392857
0.909207			0.5
0.879485			0.634146
0.973897			0.242424
0.874566			0.521739
0.888317			0.655172
0.856549			0.466667
0.663556				0.0416667
0.783824				0.0588235
0.773815				0.259259
1.02566				0
0.720568				0.37931
0.624754				0.304348
0.942969				0.388889
0.887753				0
0.478505				0
0.812165				0.0967742
0.881372				0.190476
0.860414				0.210526
0.84409				0.368421
0.693841				0.204545
0.805242				0.682927
0.791572				0.103448
0.838491				0.263158
0.463696				0
0.772177				0.153846
0.81494				0.179487
0.933967				0.742857
0.885827				0
0.885576				0.727273
0.968687				0.142857
0.936665				0.4375
0.880628				0.365854
0.930796				0.272727
0.852117				0.391304
0.877284				0.551724
0.845999				0.333333
