# Supplementary material for: Dual mechanisms of opioid-induced respiratory depression in the inspiratory rhythm-generating network
Source: eLife. 2021 Aug 17;10:e67523. doi: 10.7554/eLife.67523 (PMC8390004; doi:10.7554/eLife.67523)
Supplement: Figure 3—source data 1. [file elife-67523-fig3-data1.xlsx]

## Sheet: C
	DATA
	Rhythm Characteristics In Vitro (n=30)
	IBI Spiking (norm to baseline)						Burst Frequency (Hz)						Burst Frequency Irregularity (Irreg. Score)						Burst Amplitude Irregularity (Irreg. Score)
	Baseline	50nM	100nM	200nM	300nM		Baseline	50nM	100nM	200nM	300nM		Baseline	50nM	100nM	200nM	300nM		Baseline	50nM	100nM	200nM	300nM
	1	0.795228	0.760557	0.701566	0.663556		0.2	0.15	0.108333	0.0666667	0.00833333		0.169578	0.234821	0.176286	0.595606	insufficient data		0.072024	0.0880695	0.0469261	0.130776	insufficient data
	1	0.816176	0.783824	0.794118	0.783824		0.141667	0.0916667	0.0333333	0.00833333	0.00833333		0.235758	0.201902	0.340577	insufficient data	insufficient data		0.0674133	0.1068	0.109056	insufficient data	insufficient data
	1	0.929252	0.817687	0.812245	0.773815		0.225	0.191667	0.125	0.075	0.0583333		0.528965	0.513212	0.627436	1.72166	2.66669		0.134037	0.319322	0.20965	0.224491	0.229018
	1	0.954697	0.889006	0.968212	1.02566		0.283333	0.1	0.0416667	0	0		0.91807	0.860157	1.44096	insufficient data	insufficient data		0.216563	0.16169	0.124858	insufficient data	insufficient data
	1	0.872973	0.863763	0.824198	0.720568		0.241667	0.158333	0.133333	0.116667	0.0916667		0.426673	0.533458	0.33143	0.679655	0.350184		0.0743875	0.0932708	0.175087	0.136887	0.110732
	1	0.776746	0.675468	0.69191	0.624754		0.191667	0.166667	0.133333	0.108333	0.0583333		0.30723	0.674299	0.242524	0.393041	0.434107		0.105715	0.169742	0.308389	0.166161	0.183717
	1	0.935728	0.940746	0.946898	0.942969		0.15	0.133333	0.108333	0.0833333	0.0583333		0.251359	0.367854	0.124613	0.209232	0.328719		0.077142	0.0895462	0.0895555	0.0399826	0.060509
	1	0.874478	0.916639	0.879566	0.887753		0.225	0.0833333	0.025	0	0		0.253194	0.127548	0.370109	insufficient data	insufficient data		0.0447035	0.100347	0.385651	insufficient data	insufficient data
	1	0.685096	0.611195	0.56134	0.478505		0.141667	0.05	0.0333333	0	0		0.326813	0.255605	1.10343	insufficient data	insufficient data		0.0740663	0.0893656	0.0880242	insufficient data	insufficient data
	1	0.873125	0.825259	0.837386	0.812165		0.258333	0.15	0.0916667	0.05	0.025		0.371613	0.401259	0.532408	0.228654	4.36856		0.0588851	0.0421263	0.0537589	0.300127	0.0892507
	1	0.830689	0.858348	0.838187	0.881372		0.175	0.158333	0.1	0.05	0.0333333		0.172583	0.476708	1.52468	0.350375	0.443204		0.112861	0.0714131	0.142842	0.0860447	0.0355502
	1	0.840265	0.824354	0.925834	0.860414		0.158333	0.133333	0.108333	0.0583333	0.0333333		0.291945	0.244756	0.247171	0.77681	0.564058		0.0746079	0.134968	0.045781	0.0420017	0.0277854
	1	0.964401	1.02072	0.989482	0.84409		0.158333	0.125	0.0916667	0.0833333	0.0583333		0.277235	0.357925	0.272469	0.543095	0.223844		0.0778319	0.0875245	0.0898693	0.0755263	0.069106
	1	0.827247	0.737504	0.715068	0.693841		0.366667	0.216667	0.158333	0.158333	0.075		0.286532	0.336677	0.373162	0.154484	0.36027		0.796439	0.779401	0.813826	1.13154	1.13743
	1	0.759295	0.897295	0.875073	0.805242		0.341667	0.308333	0.308333	0.266667	0.233333		0.388437	0.228127	0.458696	0.434129	0.400822		0.103245	0.0989031	0.102733	0.0812327	0.0809236
	1	0.693167	0.573392	0.629525	0.791572		0.241667	0.133333	0.0833333	0.0166667	0.025		0.424397	0.300628	0.792233	insufficient data	insufficient data		0.0896336	0.0437732	0.0580823	insufficient data	insufficient data
	1	0.829421	0.943897	0.801681	0.838491		0.158333	0.133333	0.108333	0.0416667	0.0416667		0.530039	0.699623	1.08032	1.00226	2.5694		0.0679394	0.11072	0.160262	0.0135942	0.0909705
	1	0.736748	0.633428	0.499046	0.463696		0.25	0.2	0.116667	0.0333333	0		0.192527	0.314364	0.373168	insufficient data	insufficient data		0.207095	0.0791022	0.0461813	insufficient data	insufficient data
	1	0.83967	0.776416	0.720331	0.772177		0.325	0.25	0.191667	0.125	0.05		0.630202	0.644772	1.06729	0.965871	1.57806		0.129762	0.126569	0.109347	1.20144	0.191489
	1	0.832706	0.818671	0.819724	0.81494		0.325	0.191667	0.108333	0.0583333	0.0583333		0.412159	0.599803	0.404418	0.329349	1.1603		0.098707	0.0827776	0.0920274	0.0367005	0.122542
	1	0.987108	0.967117	0.918341	0.933967		0.291667	0.266667	0.258333	0.25	0.216667		0.482627	0.320048	0.403875	0.489805	0.360134		0.0804354	0.074409	0.0560471	0.0560373	0.0658599
	1	0.902206	0.904712	0.88451	0.885827		0.308333	0.225	0.116667	0.0583333	0		0.283667	0.584798	0.505376	0.418286	insufficient data		0.111135	0.184354	0.192833	0.100585	insufficient data
	1	0.948659	0.948258	0.896618	0.885576		0.183333	0.175	0.158333	0.141667	0.133333		0.664684	0.610031	0.511252	0.818897	0.955601		0.0516436	0.0587663	0.0614688	0.0783837	0.0968956
	1	0.980232	1.03779	0.957918	0.968687		0.233333	0.183333	0.158333	0.0916667	0.0333333		0.266649	0.457474	0.88537	0.497376	insufficient data		0.150111	0.135064	0.158864	0.188425	insufficient data
	1	0.958943	0.941605	0.909207	0.936665		0.133333	0.116667	0.0916667	0.0666667	0.0583333		0.527951	0.341233	0.41721	0.19258	0.630679		0.0661845	0.0665509	0.0376052	0.0607119	0.0508238
	1	0.966479	0.926775	0.879485	0.880628		0.341667	0.275	0.266667	0.216667	0.125		0.300945	0.432248	0.264354	0.225051	0.510024		0.262415	0.259041	0.395843	0.306945	0.236054
	1	0.989802	0.997754	0.973897	0.930796		0.275	0.208333	0.125	0.0666667	0.075		0.424135	0.513727	0.996492	0.629097	0.857417		0.215553	0.250022	0.322735	0.21389	0.271382
	1	0.932153	0.914946	0.874566	0.852117		0.383333	0.325	0.241667	0.2	0.15		0.199868	0.14755	0.276776	0.268154	0.299611		0.06466	0.0942421	0.134154	0.196665	0.193766
	1	0.982747	0.922191	0.888317	0.877284		0.241667	0.2	0.191667	0.158333	0.133333		0.284102	0.283832	0.495957	0.479652	0.384345		0.0815077	0.0912258	0.0928228	0.147259	0.0882968
	1	0.97569	0.933662	0.856549	0.845999		0.25	0.175	0.141667	0.116667	0.0833333		0.479122	0.291539	0.362706	0.371489	0.438083		0.0699762	0.089682	0.100737	0.211015	0.0873242
	STATISTICS
	RM One-way ANOVA						RM One-way ANOVA						RM Mixed effects analysis						RM Mixed effects analysis
	Source of Variation	P value	P value summary	Statistically significant (P < 0.05)?	F (DFn, DFd)		Source of Variation	P value	P value summary	Statistically significant (P < 0.05)?	F (DFn, DFd)		Fixed effect (type III)	P value	P value summary	Statistically significant (P < 0.05)?	F (DFn, DFd)		Fixed effect (type III)	P value	P value summary	Statistically significant (P < 0.05)?	F (DFn, DFd)
	Treatment	<0.0001	****	Yes	F (2.105, 61.03) = 39.67		Treatment	<0.0001	****	Yes	F (1.990, 57.72) = 190.1		Treatment	0.0098	**	Yes	F (1.422, 35.92) = 6.220		Treatment	0.1629	ns	No	F (1.285, 33.73) = 2.005
	Bonferroni's multiple comparisons test						Bonferroni's multiple comparisons test						Dunnett's multiple comparisons test						Dunnett's multiple comparisons test
		Mean Diff.	95.00% CI of diff.	Summary	P Value			Mean Diff.	95.00% CI of diff.	Summary	P Value			Mean Diff.	95.00% CI of diff.	Summary	P Value			Mean Diff.	95.00% CI of diff.	Summary	P Value
	Baseline vs. 50nM	0.1236	0.07976 to 0.1675	****	<0.0001		Baseline vs. 50nM	0.2634	0.1820 to 0.3448	****	<0.0001		Baseline vs. 50nM	-0.0349	-0.1048 to 0.03500	ns	0.5232		Baseline vs. 50nM	-0.009366	-0.03365 to 0.01492	ns	0.7246
	Baseline vs. 100nM	0.1446	0.08657 to 0.2026	****	<0.0001		Baseline vs. 100nM	0.4514	0.3477 to 0.5551	****	<0.0001		Baseline vs. 100nM	-0.1898	-0.3484 to -0.03114	*	0.0152		Baseline vs. 50nM	-0.03002	-0.07153 to 0.01148	ns	0.2137
	Baseline vs. 200nM	0.171	0.1122 to 0.2298	****	<0.0001		Baseline vs. 200nM	0.6274	0.5106 to 0.7443	****	<0.0001		Baseline vs. 200nM	-0.1553	-0.3094 to -0.001255	*	0.0478		Baseline vs. 50nM	-0.08348	-0.1967 to 0.02975	ns	0.1961
	Baseline vs. 300nM	0.1841	0.1212 to 0.2470	****	<0.0001		Baseline vs. 300nM	0.7383	0.6336 to 0.8430	****	<0.0001		Baseline vs. 300nM	-0.5699	-1.109 to -0.03096	*	0.0363		Baseline vs. 50nM	-0.04346	-0.08833 to 0.001405	ns	0.0594

## Sheet: E
	DATA						STATISTICS
	Faction of Failed Bursts (Failures / Total Attempts)						RM Mixed effects analysis
							Fixed effect (type III)	P value	P value summary	F (DFn, DFd)
	Baseline	50nM	100nM	200nM	300nM		Treatment Factor	<0.0001	****	F (2.222, 62.20) = 24.08
	0.04	0	0.133333	0.2	0.666667
	0	0	0.5	0.75	0.5
	0.0357143	0.08	0.117647	0.25	0.3		Dunnett's multiple comparisons test
	0.128205	0.142857	0.375	insufficient data	insufficient data		Treatment	mean diff.	95.00% CI of diff.	Significant?	Summary	Adjusted P Value
	0.0333333	0	0.157895	0.263158	0.5		Baseline vs. 50nM	-0.04548	-0.08291 to -0.008057	Yes	*	0.0136
	0.08	0.0476191	0	0.133333	0.125		Baseline vs. 100nM	-0.1496	-0.2238 to -0.07530	Yes	****	<0.0001
	0	0.111111	0.0714286	0.0909091	0.363636		Baseline vs. 200nM	-0.197	-0.3039 to -0.09017	Yes	***	0.0002
	0	0	0.25	0	1		Baseline vs. 300nM	-0.3438	-0.4779 to -0.2096	Yes	****	<0.0001
	0	0	0.2	insufficient data	insufficient data
	0.0606061	0.142857	0.352941	0.538462	0.571429
	0.125	0.136364	0.2	0.333333	0.428571
	0	0.111111	0.5	0.611111	0.555556
	0.136364	0.423077	0.541667	0.166667	0.5
	0.12	0.235294	0.24	0.173913	0.4
	0.108696	0.097561	0.139535	0.0857143	0
	0.0333333	0.111111	0.166667	0.5	0.571429
	0.24	0.111111	0.235294	0.375	0.375
	0.166667	0.142857	0.416667	0.75	1
	0.113636	0.189189	0.258065	0.444444	0.571429
	0.152174	0.233333	0.409091	0.3	0.125
	0.0789474	0.111111	0.138889	0.166667	0.133333
	0.119048	0.228571	0.363636	0.5	1
	0.185185	0.16	0.05	0.0555556	0.238095
	0.151515	0.266667	0.173913	0.3125	0.5
	0	0.0666667	0	0	0.125
	0	0.108108	0.0588235	0.0714286	0.166667
	0.282609	0.404762	0.605263	0.619048	0.709677
	0.08	0.0930233	0.0333333	0	0.142857
	0.216216	0.172414	0.258065	0.208333	0.333333
	0	0.125	0.227273	0.125	0.230769

## Sheet: I
	DATA												STATISTICS
	Rhythm Characteristics In Vivo (n=6)
	IBI Spiking (norm to baseline)			Burst Frequency (Hz)			IBI (s)			TI (s)			IBI Spiking (norm to baseline)			Burst Frequency (Hz)			IBI (s)			TI (s)
	Baseline	Morphine		Baseline	Morphine		Baseline	Morphine		Baseline	Morphine		Ratio paired t test (two-tailed)			Ratio paired t test (two-tailed)			Ratio paired t test (two-tailed)			Ratio paired t test (two-tailed)
	1	0.843521		1.9	1.03333		0.275294	0.631458		0.251128	0.311613		P value	0.0228		P value	0.0059		P value	0.0087		P value	0.0026
	1	0.957013		0.9	0.7		0.789079	1.01811		0.316424	0.380756		summary	*		summary	**		summary	**		summary	**
	1	0.887625		1.53333	1.2		0.412137	0.568543		0.241433	0.267979		Significant?	Yes		Significant?	Yes		Significant?	Yes		Significant?	Yes
	1	0.722288		2	1.3		0.284706	0.500066		0.218258	0.260734		t, df	t=3.247, df=5		t, df	t=4.591, df=5		t, df	t=4.180, df=5		t, df	t=5.574, df=5
	1	0.660232		1.76667	0.933333		0.300758	0.740259		0.271704	0.317121
	1	0.917324		2	1.73333		0.254845	0.312914		0.249561	0.259546
