# Supplementary material for: Dual mechanisms of opioid-induced respiratory depression in the inspiratory rhythm-generating network
Source: eLife. 2021 Aug 17;10:e67523. doi: 10.7554/eLife.67523 (PMC8390004; doi:10.7554/eLife.67523)
Supplement: Figure 4—figure supplement 1—source data 1. [file elife-67523-fig4-figsupp1-data1.xlsx]

## Sheet: C
DATA								STATISTICS
Change in Vm during photostimulation								Two-way RM ANOVA
Oprm1+				Oprm1-				Source of Variation	% of total variation	P value	Summary	Significant?
2 mW	4 mW	6 mW		2 mW	4 mW	6 mW		Treatment Factor	2.473	0.0044	**	Yes
-4.3606	-6.21857	-6.9151		-0.9394	-1.68505	-1.7429		Group Factor	87.76	<0.0001	****	Yes
-4.36487	-4.07622	-4.98043		0.1413	-1.57555	-0.9903
-3.80293	-4.66535	-5.4198		-0.84675	-0.77592	-1.01479		Bonferroni's multiple comparisons test
				-0.03952	0.498894	-0.48759		Oprm1+ vs Oprm1-	Mean Diff.	95.00% CI of diff.	Summary	Adjusted P Value
				-0.210933	-0.0073328	0.44221		2 mW	-3.933	-5.294 to -2.572	****	<0.0001
				0.25162	0.0968246	0.0467926		4 mW	-4.482	-5.844 to -3.121	****	<0.0001
				-0.0574501	-0.0816135	0.145452		6 mW	-5.257	-6.618 to -3.896	****	<0.0001
