# Supplementary material for: Dual mechanisms of opioid-induced respiratory depression in the inspiratory rhythm-generating network
Source: eLife. 2021 Aug 17;10:e67523. doi: 10.7554/eLife.67523 (PMC8390004; doi:10.7554/eLife.67523)
Supplement: Figure 4—source data 1. [file elife-67523-fig4-data1.xlsx]

## Sheet: C
	DATA															STATISTICS
	Optogenetic hyperpolarization of Oprm1 neurons (n=9)
	IBI Spiking (norm to baseline)															RM One-way ANOVA						RM One-way ANOVA						RM One-way ANOVA
	Baseline	2mW	4mW	6mW		50nM	100nM	200nM	300nM		DAMGO Baseline	2mW	4mW	6mW		Source of Variation	P value	P value summary	Statistically significant (P < 0.05)?	F (DFn, DFd)		Source of Variation	P value	P value summary	Statistically significant (P < 0.05)?	F (DFn, DFd)		Source of Variation	P value	P value summary	Statistically significant (P < 0.05)?	F (DFn, DFd)
	1	0.788367	0.579559	0.448706		0.795228	0.760557	0.701566	0.663556		0.592508	0.447604	0.358572	0.285529		Treatment	<0.0001	****	Yes	F (1.545, 12.36) = 61.07		Treatment	0.0003	***	Yes	F (1.539, 12.31) = 18.75		Treatment	0.0001	***	Yes	F (1.307, 7.840) = 42.87
	1	0.699126	0.640704	0.584929		0.816176	0.783824	0.794118	0.783824		0.970371	0.635409	0.517505	0.492442
	1	0.727321	0.771274	0.72188		0.929252	0.817687	0.812245	0.773815		0.749909	0.593153	0.516097	0.490388		Bonferroni's multiple comparisons test						Bonferroni's multiple comparisons test						Bonferroni's multiple comparisons test
	1	0.830616	0.722976	0.686364		0.954697	0.889006	0.968212	1.02566		0.860736	0.731904	0.734942	0.762627			Mean Diff.	95.00% CI of diff.	Summary	P Value			Mean Diff.	95.00% CI of diff.	Summary	P Value			Mean Diff.	95.00% CI of diff.	Summary	P Value
	1	0.758283	0.71725	0.605154		0.872973	0.863763	0.824198	0.720568							baseline vs. 2mW	0.2356	0.1551 to 0.3161	****	<0.0001		baseline vs. 50nM	0.1302	0.06235 to 0.1980	**	0.0011		post-damgo baseline vs. 2mW	0.2216	0.1204 to 0.3228	**	0.0011
	1	0.705837	0.631774	0.507649		0.776746	0.675468	0.69191	0.624754		0.698221	0.456711	0.402713	0.410776		baseline vs. 4mW	0.3211	0.2062 to 0.4360	****	<0.0001		baseline vs. 100nM	0.1697	0.08074 to 0.2586	**	0.0011		post-damgo baseline vs. 4mW	0.2853	0.1540 to 0.4167	**	0.0011
	1	0.637267	0.455203	0.412126		0.935728	0.940746	0.946898	0.942969		0.869227	0.559982	0.493858	0.471894		baseline vs. 6mW	0.3955	0.2660 to 0.5250	****	<0.0001		baseline vs. 200nM	0.1715	0.06984 to 0.2732	**	0.0026		post-damgo baseline vs. 6mW	0.3046	0.1579 to 0.4513	**	0.0015
	1	0.85539	0.767057	0.68095		0.874478	0.916639	0.879566	0.887753		0.81275	0.577765	0.532723	0.508056								baseline vs. 300nM	0.1961	0.05694 to 0.3353	**	0.0078
	1	0.877473	0.824441	0.79256		0.873125	0.825259	0.837386	0.812165
	Burst Frequency (norm to baseline)
	Baseline	2mW	4mW	6mW		50nM	100nM	200nM	300nM		DAMGO Baseline	2mW	4mW	6mW		RM One-way ANOVA						RM One-way ANOVA
	1	0.945646	0.78236	0.729301		0.75	0.541667	0.333333	0.0416667		No Rhythm					Source of Variation	P value	P value summary	Statistically significant (P < 0.05)?	F (DFn, DFd)		Source of Variation	P value	P value summary	Statistically significant (P < 0.05)?	F (DFn, DFd)
	1	0.513177	0	0		0.647059	0.235294	0.0588235	0.0588235							Treatment	0.0003	***	Yes	F (1.590, 12.72) = 17.96		Treatment	<0.0001	****	Yes	F (1.756, 14.05) = 79.22
	1	0.815516	0.739268	0.521893		0.851852	0.555556	0.333333	0.259259
	1	1.22137	1.13259	0.914961		0.352941	0.147059	0	0							Bonferroni's multiple comparisons test						Bonferroni's multiple comparisons test
	1	0.627451	0.745969	0.483703		0.655172	0.551724	0.482759	0.37931								Mean Diff.	95.00% CI of diff.	Summary	P Value			Mean Diff.	95.00% CI of diff.	Summary	P Value
	1	0.835707	0.739208	0.498228		0.869565	0.695652	0.565217	0.304348							baseline vs. 2mW	0.1976	-0.01732 to 0.4124	ns	0.0726		baseline vs. 50nM	0.3428	0.1166 to 0.5689	**	0.005
	1	0.926121	0.697793	0.417074		0.888889	0.722222	0.555556	0.388889							baseline vs. 4mW	0.324	0.02542 to 0.6226	*	0.0339		baseline vs. 100nM	0.562	0.3209 to 0.8031	***	0.0003
	1	0.63137	0.552392	0.460049		0.319	0.138	0	0							baseline vs. 6mW	0.4889	0.2405 to 0.7373	**	0.001		baseline vs. 200nM	0.7197	0.4757 to 0.9638	****	<0.0001
	1	0.705658	0.694444	0.574431		0.580645	0.354839	0.193548	0.0967742													baseline vs. 300nM	0.8301	0.6571 to 1.003	****	<0.0001
	Ratio: Burst Frequency / IBI spiking Ratio (norm to baseline)
	Baseline	2mW	4mW	6mW		50nM	100nM	200nM	300nM		DAMGO Baseline	2mW	4mW	6mW		RM One-way ANOVA						RM One-way ANOVA
	1	1.1995	1.34992	1.62534		0.9084	0.573245	0.317905	0.048426		No Rhythm					Source of Variation	P value	P value summary	Statistically significant (P < 0.05)?	F (DFn, DFd)		Source of Variation	P value	P value summary	Statistically significant (P < 0.05)?	F (DFn, DFd)
	1	0.734026	0	0		0.654901	0.253604	0.114469	0							Treatment	0.41	ns	No	F (1.641, 13.13) = 0.9031		Treatment
	1	1.12126	0.958503	0.722964		0.938426	0.571165	0.291316	0.429264
	1	1.47044	1.56657	1.33306		0.296167	0.285596	0	0							Bonferroni's multiple comparisons test						Bonferroni's multiple comparisons test
	1	0.827463	1.04004	0.799306		0.750507	0.638745	0.585731	0.526404								Mean Diff.	95.00% CI of diff.	Summary	P Value			Mean Diff.	95.00% CI of diff.	Summary	P Value
	1	1.18399	1.17005	0.981443		1.1195	1.02988	0.816894	0.487148							Baseline vs. 2mW	-0.05914	-0.3546 to 0.2363	ns	>0.9999		Baseline vs. 50nM	0.2613	-0.03287 to 0.5556	ns	0.0862
	1	1.45327	1.53293	1.01201		0.949944	0.767712	0.586711	0.412409							Baseline vs. 4mW	-0.02005	-0.5047 to 0.4646	ns	>0.9999		Baseline vs. 100nM	0.4777	0.1823 to 0.7730	**	0.0034
	1	0.738108	0.720145	0.675598		0.365	0.150918	0	0							Baseline vs. 6mW	0.1251	-0.3328 to 0.5829	ns	>0.9999		Baseline vs. 200nM	0.6729	0.3697 to 0.9761	***	0.0004
	1	0.804193	0.842321	0.724779		0.665019	0.429973	0.231134	0.119156													Baseline vs. 300nM	0.7752	0.5273 to 1.023	****	<0.0001

## Sheet: D
	DATA				STATISTICS
	Oprm1+ hyperpolarization In Vitro vs. DAMGO (n=9)
	IBI Spiking (norm to baseline)				IBI Spiking (norm to baseline)
	2mW	300nM			Paired t test (two-tailed)
	0.788367	0.663556			P value	0.4205
	0.699126	0.783824			Summary	ns
	0.727321	0.773815			Significant?	No
	0.830616	1.02566			t, df	t=0.8492, df=8
	0.758283	0.720568
	0.705837	0.624754
	0.637267	0.942969
	0.85539	0.887753
	0.877473	0.812165
	Burst Frequency (norm to baseline)				Burst Frequency (norm to baseline)
	2mW	300nM			Paired t test (two-tailed)
	0.945646	0.0416667			P value	0.0001
	0.513177	0.0588235			Summary	***
	0.815516	0.259259			Significant?	Yes
	1.22137	0			t, df	t=6.786, df=8
	0.627451	0.37931
	0.835707	0.304348
	0.926121	0.388889
	0.63137	0
	0.705658	0.0967742
	Ratio: Burst Frequency / IBI spiking Ratio (norm to baseline)				Ratio: Burst Frequency / IBI spiking Ratio (norm to baseline)
	2mW	300nM			Paired t test (two-tailed)
	1.1995	0.062793			P value	<0.0001
	0.734026	0.0750469			Summary	****
	1.12126	0.33504			Significant?	Yes
	1.47044	0			t, df	t=7.440, df=8
	0.827463	0.526404
	1.18399	0.487148
	1.45327	0.412409
	0.738108	0
	0.804193	0.119156

## Sheet: H
	DATA				STATISTICS
	Neuron spiking during photoinhibiton in vivo (n=6)				RM One-way ANOVA
	spike frequency (Hz)				Source of Variation	P value	P value summary	Statistically significant (P < 0.05)?	F (DFn, DFd)
	pre (OFF)	light (ON)	post (OFF)		Treatment	0.0029	**	Yes	F (1.314, 6.569) = 18.95
	5.00074	3.01598	4.91086
	2.74744	0	2.54396		Bonferroni's multiple comparisons test
	10.973	6.37287	10.3177			Mean Diff.	95.00% CI of diff.	Summary	P Value
	20.4571	13.3699	19.1388		OFF vs. ON	3.531	0.9843 to 6.077	*	0.0142
	7.67967	5.34752	6.7986		OFF vs. POST	0.2995	-0.8955 to 1.494	ns	0.9277
	8.44165	6.00915	9.79288

## Sheet: I
	DATA				STATISTICS
	Oprm1+ hyperpolarization In Vivo vs. Morphine
	IBI Spiking (norm to baseline)				IBI Spiking (norm to baseline)
	6mW	Morphine			unpaired t test (two-tailed)
	0.838449	0.843521			P value	0.7182
	0.947245	0.957013			Summary	ns
	0.829275	0.887625			Significant?	No
	0.738175	0.722288			t, df	t=0.3724, df=9
	0.678908	0.660232
		0.917324
	Burst Frequency (norm to baseline)				Burst Frequency (norm to baseline)
	6mW	Morphine			unpaired t test (two-tailed)
	0.960784	0.54386			P value	0.0039
	1.17391	0.777778			Summary	**
	0.892857	0.782609			Significant?	Yes
	0.929825	0.65			t, df	t=3.849, df=9
	0.976744	0.528302
		0.866667
	Ratio: Burst Frequency / IBI spiking Ratio (norm to baseline)				Ratio: Burst Frequency / IBI spiking Ratio (norm to baseline)
	6mW	Morphine			unpaired t test (two-tailed)
	1.14591	0.64475			P value	0.0004
	1.23929	0.812714			Summary	***
	1.07667	0.881689			Significant?	Yes
	1.25963	0.899918			t, df	t=5.487, df=9
	1.4387	0.800176
		0.944777
