# Supplementary material for: Dual mechanisms of opioid-induced respiratory depression in the inspiratory rhythm-generating network
Source: eLife. 2021 Aug 17;10:e67523. doi: 10.7554/eLife.67523 (PMC8390004; doi:10.7554/eLife.67523)
Supplement: Figure 5—source data 1. [file elife-67523-fig5-data1.xlsx]

## Sheet: B
	DATA
	Oprm1+ Neurons																								Oprm1- Neurons
		Replicate # (neurons)																								Replicate # (neurons)
	Bin Center	1	2	3	4	5	6	7	8	9	10	11	12	13	14	15	16	17	18	19	20	21	22		Bin Center	1	2	3	4	5	6	7	8	9	10	11	12	13	14	15	16	17
	X (time relative to light, ms)	Y (probability density)																							X (time relative to light, ms)	Y (probability density)
	-45	0	0	0.02	0	0	0	0	0	0	0	0	0	0	0	0	0	0	0	0.0232558	0	0	0		-45	0.01	0	0.01	0	0.142857	0	0	0	0.00917431	0	0	0.01	0	0	0	0	0
	-44	0	0	0.02	0	0	0	0	0	0	0	0	0	0	0	0	0	0	0	0	0	0	0		-44	0.01	0	0.01	0.333333	0	0	0	0	0	0	0	0.01	0.03125	0	0	0	0.0136986
	-43	0	0	0	0	0	0	0	0	0	0	0	0	0	0	0	0	0	0	0	0	0	0		-43	0.01	0	0.01	0	0	0	0	0	0.0183486	0	0.0769231	0.01	0.015625	0.037037	0	0	0
	-42	0	0	0	0	0	0	0	0	0	0	0	0	0	0.0188679	0	0	0	0	0	0	0	0		-42	0.01	0	0.01	0	0	0	0.04	0	0	0	0.0769231	0.01	0	0	0	0	0
	-41	0	0	0	0	0	0	0	0	0	0	0	0	0	0	0	0	0	0	0	0	0	0		-41	0.01	0	0.01	0	0	0	0.04	0	0.00917431	0	0	0.01	0	0	0	0	0.0273973
	-40	0	0	0	0	0	0	0	0	0	0	0	0	0	0	0	0	0	0	0	0	0	0		-40	0.01	0	0.01	0	0	0	0	0	0	0	0	0.01	0	0	0	0	0
	-39	0	0	0.02	0	0	0	0	0.0144928	0.0175439	0	0	0	0	0	0	0	0	0	0.0465116	0	0	0		-39	0.01	0	0.01	0	0	0	0	0	0	0	0	0.01	0.015625	0	0	0	0
	-38	0	0	0	0	0	0	0	0	0	0	0	0	0	0.0188679	0	0	0	0	0	0	0	0		-38	0.01	0	0.01	0	0	0	0	0.0204082	0.00917431	0	0	0.01	0.015625	0.037037	0	0	0.0136986
	-37	0	0.0181818	0	0	0	0	0	0	0	0	0	0	0	0	0	0	0	0	0	0	0	0		-37	0.01	0	0.01	0	0	0	0	0.0204082	0.00917431	0	0	0.01	0	0	0.0175439	0	0.0136986
	-36	0	0	0	0	0	0	0	0	0	0	0	0	0	0	0	0	0	0	0	0	0	0		-36	0.01	0	0.01	0	0	0	0	0	0.00917431	0	0.0769231	0.01	0	0	0	0	0
	-35	0	0	0	0	0	0	0	0	0	0	0	0	0	0.0188679	0	0	0	0	0	0	0	0		-35	0.01	0	0.01	0	0.142857	0	0	0	0	0	0	0.01	0.015625	0.037037	0.0175439	0	0
	-34	0	0	0	0	0	0	0	0	0	0	0	0	0	0	0	0	0	0	0	0	0	0		-34	0.01	0	0.01	0	0	0	0	0	0.0366972	0	0	0.01	0	0	0.0175439	0.25	0
	-33	0	0	0	0	0	0	0	0	0	0	0	0	0	0	0	0	0	0	0	0	0	0		-33	0.01	0	0.01	0	0	0	0	0	0.00917431	0	0	0.01	0	0	0	0	0
	-32	0	0	0	0	0	0	0	0	0	0	0	0	0	0	0	0	0	0	0	0	0	0		-32	0.01	0	0.01	0	0	0	0	0	0.00917431	0	0	0.01	0	0.037037	0.0350877	0	0.0136986
	-31	0	0	0	0	0	0	0	0	0	0	0	0	0	0	0	0	0	0	0	0	0	0		-31	0.01	0	0.01	0	0	0	0	0	0.00917431	0	0	0.01	0	0.037037	0	0	0.0136986
	-30	0	0	0.02	0	0	0	0	0	0	0	0	0	0	0	0	0	0	0	0	0	0	0		-30	0.01	0	0.01	0	0	0	0	0.0204082	0.0183486	0.0227273	0	0.01	0	0	0	0	0.0273973
	-29	0	0	0	0	0	0	0	0	0	0	0	0	0	0	0	0	0	0	0	0.0196078	0	0		-29	0.01	0	0.01	0	0	0	0.04	0	0.00917431	0	0	0.01	0	0	0	0	0
	-28	0	0	0.02	0	0	0	0	0	0	0	0	0	0	0	0	0	0	0	0	0	0	0		-28	0.01	0.25	0.01	0	0	0	0	0	0	0	0	0.01	0.015625	0	0	0	0
	-27	0	0.0181818	0	0	0	0	0	0	0	0	0	0	0	0	0	0	0	0	0.0232558	0	0	0		-27	0.01	0	0.01	0	0	0	0	0	0.0183486	0	0	0.01	0.015625	0	0	0	0
	-26	0	0	0	0	0	0	0	0.0144928	0	0	0	0	0	0	0	0	0	0	0	0	0	0		-26	0.01	0	0.01	0	0	0	0	0	0.0366972	0	0	0.01	0	0	0	0	0
	-25	0	0	0	0	0	0	0	0	0	0	0	0	0	0	0	0	0	0	0	0	0	0		-25	0.01	0	0.01	0	0	0	0.04	0	0	0	0	0.01	0.03125	0	0	0	0
	-24	0	0	0	0	0	0	0	0	0	0	0	0	0	0	0	0	0	0	0	0	0	0		-24	0.01	0	0.01	0	0	0	0	0	0.00917431	0	0	0.01	0	0	0	0	0
	-23	0	0	0	0	0	0	0	0	0	0	0	0	0	0	0	0	0.0196078	0	0	0	0	0		-23	0.01	0	0.01	0	0	0	0	0	0	0	0	0.01	0.015625	0	0	0	0
	-22	0	0	0	0	0	0	0	0	0	0	0	0	0	0	0	0	0	0	0	0	0	0		-22	0.01	0	0.01	0	0	0	0	0	0	0	0	0.01	0	0.037037	0	0	0
	-21	0	0	0	0	0	0	0	0	0.0350877	0	0	0	0	0	0	0	0	0	0	0	0	0		-21	0.01	0	0.01	0	0	0	0	0	0.00917431	0	0	0.01	0.015625	0	0	0	0
	-20	0	0	0	0	0	0	0	0	0	0	0	0	0	0	0	0	0	0	0	0	0	0		-20	0.01	0	0.01	0	0	0	0	0	0.00917431	0	0	0.01	0	0.037037	0	0	0
	-19	0	0	0	0	0	0	0	0	0	0	0	0	0	0	0	0	0	0	0	0	0	0		-19	0.01	0	0.01	0	0	0	0	0	0.0183486	0	0	0.01	0	0	0	0	0
	-18	0	0	0	0	0	0	0	0	0	0	0	0	0	0	0	0	0	0	0	0	0	0.0243902		-18	0.01	0	0.01	0	0	0	0	0.0204082	0	0	0	0.01	0.03125	0	0	0	0
	-17	0	0	0	0	0	0	0	0	0.0175439	0	0	0	0	0	0	0	0	0	0	0	0	0		-17	0.01	0	0.01	0	0.142857	0	0.08	0	0	0	0.0769231	0.01	0	0.037037	0	0	0
	-16	0	0	0	0	0	0	0	0	0	0	0	0	0	0	0	0	0	0	0	0	0	0		-16	0.01	0	0.01	0	0	0	0	0.0408163	0.00917431	0	0	0.01	0.015625	0	0	0	0
	-15	0	0	0	0	0	0	0	0	0	0	0	0	0	0	0	0	0	0	0	0	0	0		-15	0.01	0	0.01	0	0	0.03125	0	0	0.00917431	0	0	0.01	0	0	0.0175439	0	0.0136986
	-14	0	0	0	0	0	0	0	0	0.0175439	0	0	0	0	0	0	0	0	0	0.0232558	0	0	0		-14	0.01	0	0.01	0	0	0	0	0	0.00917431	0	0	0.01	0.015625	0.037037	0.0175439	0	0
	-13	0	0	0	0	0	0	0	0	0	0	0	0	0	0	0	0	0	0	0	0	0	0		-13	0.01	0	0.01	0	0	0	0	0	0.00917431	0	0	0.01	0.015625	0	0	0	0
	-12	0	0	0	0	0	0	0	0	0	0	0	0	0	0	0	0	0	0	0	0	0	0		-12	0.01	0	0.01	0	0	0	0	0	0	0	0	0.01	0	0	0	0	0
	-11	0	0	0	0	0	0	0	0	0	0	0	0	0	0	0	0	0	0	0	0	0	0		-11	0.01	0	0.01	0	0	0	0	0	0	0	0	0.01	0.046875	0	0.0175439	0	0
	-10	0	0	0	0	0	0	0	0	0	0	0	0	0	0	0	0	0	0	0	0	0	0		-10	0.01	0	0.01	0	0	0	0	0	0.00917431	0	0	0.01	0	0	0.0175439	0	0.0136986
	-9	0	0	0	0	0	0	0	0	0	0	0	0	0	0	0	0	0	0	0	0	0	0		-9	0.01	0	0.01	0	0	0	0.04	0	0.0183486	0	0	0.01	0.03125	0	0	0	0.0136986
	-8	0	0	0	0	0	0	0	0	0	0	0	0	0	0	0	0	0	0	0	0	0	0		-8	0.01	0	0.01	0	0	0	0	0.0204082	0.00917431	0	0	0.01	0	0	0	0	0.0136986
	-7	0	0	0	0	0	0	0	0	0	0	0	0	0	0	0	0	0	0	0.0232558	0	0	0		-7	0.01	0	0.01	0	0	0	0.04	0	0	0	0	0.01	0.015625	0	0.0175439	0	0.0136986
	-6	0	0	0	0	0	0	0	0	0	0	0	0	0	0	0	0	0	0	0	0	0	0		-6	0.01	0	0.01	0	0.142857	0	0	0.0408163	0.00917431	0	0	0.01	0	0	0.0175439	0	0
	-5	0	0	0	0	0	0	0	0	0	0	0	0	0	0	0	0	0	0	0	0	0	0		-5	0.01	0	0.01	0	0	0	0	0	0	0	0	0.01	0.03125	0.037037	0	0	0
	-4	0	0	0	0	0	0	0	0	0	0	0	0	0	0	0	0	0.0196078	0	0	0	0	0		-4	0.01	0	0.01	0	0	0	0	0.0204082	0.0183486	0	0	0.01	0.015625	0.0740741	0.0526316	0	0
	-3	0	0	0	0	0	0	0	0	0	0	0	0	0	0	0	0	0	0	0.0232558	0	0	0		-3	0.01	0	0.01	0	0	0	0	0.0204082	0	0	0	0.01	0	0	0	0	0.0136986
	-2	0	0	0	0	0	0	0	0	0	0	0	0	0	0	0	0	0	0	0	0	0	0		-2	0.01	0	0.01	0	0	0	0	0	0	0.0227273	0	0.01	0.015625	0	0	0	0
	-1	0	0	0	0	0	0	0	0.0144928	0.0175439	0	0	0	0	0	0	0	0	0	0	0	0	0		-1	0.01	0	0.01	0.333333	0	0	0	0	0	0	0.0769231	0.01	0.015625	0	0	0	0
	0	0	0	0	0	0	0	0	0	0	0	0	0	0	0	0	0	0	0	0	0	0	0		0	0.01	0	0.01	0	0	0	0	0.0204082	0.0183486	0	0.0769231	0.01	0	0	0	0	0
	1	0	0	0	0	0	0	0	0	0	0	0	0	0	0	0	0	0	0	0	0	0	0		1	0.01	0	0.01	0	0	0	0.04	0.0204082	0.00917431	0	0	0.01	0.015625	0	0	0	0
	2	0	0	0	0	0	0	0	0	0	0	0	0	0	0	0	0	0	0	0	0	0	0		2	0.01	0	0.01	0	0	0	0	0	0.0183486	0	0	0.01	0	0	0	0	0
	3	0	0	0	0	0	0	0	0	0	0	0.18	0	0	0	0	0	0	0	0.0232558	0.0196078	0	0		3	0.01	0	0.01	0	0	0	0	0.0204082	0.0183486	0	0	0.01	0	0	0	0	0.0273973
	4	0	0.0363636	0	0	0	0	0	0	0	0.08	0.74	0	0	0	0.0232558	0	0	0	0.0232558	0	0	0		4	0.01	0	0.01	0	0	0	0.04	0	0.0183486	0	0	0.01	0.03125	0	0	0	0
	5	0	0.0545455	0.02	0	0.0113636	0	0	0.0144928	0	0.44	0.08	0	0	0.150943	0.418605	0	0.0196078	0	0	0.0392157	0	0		5	0.01	0	0.01	0	0	0	0	0	0.00917431	0	0	0.01	0	0	0.0350877	0	0.0273973
	6	0	0.127273	0.04	0	0.147727	0	0	0.057971	0.0526316	0.42	0	0	0	0.339623	0.511628	0	0	0	0.0232558	0	0	0		6	0.01	0	0.01	0	0	0	0	0	0.0183486	0	0	0.01	0	0	0.0175439	0	0
	7	0	0.690909	0	0	0.284091	0.04	0	0.0289855	0.105263	0.06	0	0.192308	0.285714	0.264151	0.0465116	0	0	0	0.0697674	0.333333	0	0.0243902		7	0.01	0	0.01	0	0	0	0	0.0408163	0.00917431	0	0	0.01	0	0	0	0	0.0273973
	8	0.02	0	0.08	0	0.102273	0.12	0.12	0.0869565	0.263158	0	0	0.423077	0.285714	0.0943396	0	0.04	0.0392157	0.04	0.0232558	0.470588	0.02	0.0243902		8	0.01	0.25	0.01	0	0	0.03125	0	0.0612245	0.00917431	0	0	0.01	0.03125	0	0.0175439	0	0.0136986
	9	0.04	0	0.14	0	0	0.34	0.56	0.115942	0.280702	0	0	0.192308	0.142857	0.0377358	0	0.18	0.0196078	0.2	0.0697674	0.0588235	0.02	0.0243902		9	0.01	0	0.01	0	0.142857	0	0.04	0	0.00917431	0	0	0.01	0	0	0.0175439	0	0
	10	0.16	0	0.3	0	0	0.5	0.32	0.289855	0.122807	0	0	0.192308	0.142857	0.0377358	0	0.36	0.176471	0.58	0.0697674	0	0.16	0.0243902		10	0.01	0	0.01	0	0	0	0	0.0408163	0.00917431	0	0.0769231	0.01	0.03125	0	0.0175439	0	0.0136986
	11	0.28	0	0.14	0.0941176	0.0227273	0	0	0.057971	0.0175439	0	0	0	0	0	0	0.3	0.215686	0.18	0.139535	0	0.52	0.0731707		11	0.01	0	0.01	0	0	0	0	0	0.0275229	0	0	0.01	0	0	0.0350877	0	0.0410959
	12	0.2	0.0363636	0.04	0.164706	0.0909091	0	0	0.057971	0.0175439	0	0	0	0	0.0188679	0	0.12	0.254902	0	0.0697674	0	0.26	0.097561		12	0.01	0	0.01	0	0	0	0	0.102041	0	0	0	0.01	0.015625	0	0.0175439	0.25	0.0136986
	13	0.14	0	0.02	0.141176	0.0568182	0	0	0.0434783	0	0	0	0	0	0	0	0	0.215686	0	0.116279	0	0	0.121951		13	0.01	0	0.01	0	0	0	0	0.0612245	0.0183486	0.0227273	0	0.01	0	0	0.0350877	0	0
	14	0.06	0	0.04	0.211765	0.0227273	0	0	0	0.0175439	0	0	0	0	0	0	0	0.0196078	0	0	0	0.02	0.121951		14	0.01	0	0.01	0	0	0.03125	0	0.0612245	0.0183486	0	0	0.01	0.015625	0	0.0350877	0	0.0136986
	15	0.02	0	0.02	0.141176	0.0227273	0	0	0	0	0	0	0	0	0	0	0	0	0	0.0465116	0	0	0.0243902		15	0.01	0	0.01	0	0	0	0	0.0816327	0.0458716	0	0	0.01	0	0	0.0877193	0	0
	16	0.02	0	0	0.0823529	0.0113636	0	0	0.0144928	0	0	0	0	0	0	0	0	0	0	0.0465116	0	0	0.0731707		16	0.01	0.25	0.01	0	0	0.03125	0	0.0816327	0.0366972	0	0.0769231	0.01	0.03125	0	0.105263	0	0
	17	0.06	0	0.02	0.0470588	0	0	0	0	0	0	0	0	0.142857	0	0	0	0	0	0.0930233	0	0	0.0731707		17	0.01	0	0.01	0	0	0.03125	0.04	0	0.0458716	0.113636	0	0.01	0.015625	0	0.0350877	0	0
	18	0	0	0.02	0.0352941	0	0	0	0.0289855	0	0	0	0	0	0	0	0	0	0	0	0	0	0.097561		18	0.01	0	0.01	0	0	0	0	0	0.0275229	0.181818	0	0.01	0.015625	0	0.0175439	0	0
	19	0	0	0	0.0470588	0.0227273	0	0	0.0144928	0	0	0	0	0	0	0	0	0	0	0	0	0	0.0731707		19	0.01	0	0.01	0	0	0.03125	0	0.0204082	0.0458716	0.0227273	0	0.01	0.03125	0	0.0175439	0	0.0136986
	20	0	0	0	0.0117647	0	0	0	0.0144928	0	0	0	0	0	0	0	0	0	0	0	0	0	0.0243902		20	0.01	0	0.01	0	0	0.125	0.04	0	0.0183486	0.113636	0	0.01	0	0	0.0350877	0	0.0136986
	21	0	0	0	0.0117647	0.0227273	0	0	0.0144928	0	0	0	0	0	0	0	0	0	0	0	0	0	0		21	0.01	0	0.01	0	0	0.09375	0	0	0.00917431	0.0454545	0	0.01	0	0	0	0	0.0273973
	22	0	0	0	0.0117647	0.0113636	0	0	0	0	0	0	0	0	0	0	0	0	0	0	0	0	0.0243902		22	0.01	0	0.01	0	0	0.03125	0.04	0	0.00917431	0.0681818	0.0769231	0.01	0	0	0.0175439	0	0.0410959
	23	0	0	0	0	0.0227273	0	0	0.057971	0	0	0	0	0	0	0	0	0	0	0	0	0	0.0243902		23	0.01	0	0.01	0	0	0.125	0	0.0408163	0.0183486	0.0454545	0	0.01	0.03125	0	0.0175439	0	0.0136986
	24	0	0	0	0	0	0	0	0.0144928	0	0	0	0	0	0	0	0	0	0	0	0	0	0.0243902		24	0.01	0	0.01	0	0	0.03125	0	0.0204082	0.00917431	0.0227273	0	0.01	0.015625	0.037037	0	0	0.0273973
	25	0	0	0	0	0.0113636	0	0	0	0	0	0	0	0	0	0	0	0	0	0	0	0	0		25	0.01	0	0.01	0	0	0	0	0	0.00917431	0.0454545	0	0.01	0	0	0	0	0.0136986
	26	0	0	0	0	0.0113636	0	0	0	0	0	0	0	0	0	0	0	0	0	0	0	0	0		26	0.01	0	0.01	0	0	0	0.04	0	0	0.0227273	0	0.01	0	0.037037	0	0	0
	27	0	0	0	0	0.0227273	0	0	0	0	0	0	0	0	0	0	0	0	0	0	0	0	0		27	0.01	0	0.01	0	0	0.0625	0.04	0.0204082	0	0.0681818	0	0.01	0.015625	0.037037	0	0	0.0136986
	28	0	0	0	0	0	0	0	0	0	0	0	0	0	0	0	0	0	0	0	0.0196078	0	0		28	0.01	0	0.01	0	0	0.03125	0	0	0	0	0	0.01	0	0.037037	0.0175439	0	0.0136986
	29	0	0	0	0	0	0	0	0	0	0	0	0	0	0	0	0	0	0	0	0	0	0		29	0.01	0	0.01	0	0	0.0625	0	0	0.00917431	0	0	0.01	0	0	0.0175439	0	0.0136986
	30	0	0	0	0	0.0113636	0	0	0	0	0	0	0	0	0	0	0	0	0	0	0	0	0.0243902		30	0.01	0	0.01	0	0	0.0625	0.04	0	0	0.0227273	0.0769231	0.01	0.03125	0	0.0175439	0	0.0273973
	31	0	0	0	0	0.0227273	0	0	0	0	0	0	0	0	0	0	0	0	0	0	0	0	0		31	0.01	0.25	0.01	0	0	0.03125	0	0	0	0	0	0.01	0	0	0	0	0.0136986
	32	0	0	0	0	0	0	0	0	0	0	0	0	0	0	0	0	0	0	0	0	0	0		32	0.01	0	0.01	0	0.142857	0	0	0	0	0	0	0.01	0.015625	0	0	0	0
	33	0	0	0	0	0	0	0	0	0	0	0	0	0	0	0	0	0	0	0	0	0	0		33	0.01	0	0.01	0	0	0	0	0	0.00917431	0.0227273	0	0.01	0	0.037037	0	0.25	0.0136986
	34	0	0	0	0	0	0	0	0	0	0	0	0	0	0	0	0	0	0	0.0232558	0	0	0		34	0.01	0	0.01	0	0.142857	0	0	0	0	0.0454545	0	0.01	0.03125	0	0.0175439	0.25	0.0273973
	35	0	0	0	0	0.0113636	0	0	0	0	0	0	0	0	0	0	0	0	0	0	0	0	0		35	0.01	0	0.01	0.333333	0	0	0.04	0	0	0	0	0.01	0.015625	0	0	0	0
	36	0	0	0	0	0	0	0	0	0	0	0	0	0	0	0	0	0	0	0	0	0	0		36	0.01	0	0.01	0	0	0.03125	0.04	0	0.0275229	0.0227273	0	0.01	0	0	0.0175439	0	0.0136986
	37	0	0	0	0	0.0113636	0	0	0	0	0	0	0	0	0	0	0	0	0	0	0	0	0		37	0.01	0	0.01	0	0	0	0	0.0204082	0	0	0	0.01	0	0	0	0	0.0273973
	38	0	0	0	0	0	0	0	0	0	0	0	0	0	0	0	0	0	0	0	0	0	0		38	0.01	0	0.01	0	0	0.03125	0	0.0408163	0.00917431	0	0	0.01	0	0.037037	0	0	0.0136986
	39	0	0	0	0	0	0	0	0	0	0	0	0	0	0	0	0	0	0	0	0	0	0		39	0.01	0	0.01	0	0	0.03125	0	0	0	0	0	0.01	0	0.037037	0.0175439	0	0.0410959
	40	0	0	0	0	0	0	0	0	0	0	0	0	0	0	0	0	0	0	0	0	0	0		40	0.01	0	0.01	0	0	0.03125	0	0	0	0.0227273	0	0.01	0.015625	0	0	0	0
	41	0	0	0	0	0	0	0	0	0	0	0	0	0	0	0	0	0	0	0	0	0	0		41	0.01	0	0.01	0	0	0	0	0	0.00917431	0	0	0.01	0.015625	0.037037	0	0	0.0410959
	42	0	0	0	0	0	0	0	0.0144928	0	0	0	0	0	0	0	0	0	0	0	0	0	0		42	0.01	0	0.01	0	0	0	0	0	0	0	0.0769231	0.01	0.015625	0	0	0	0.0136986
	43	0	0	0	0	0	0	0	0	0	0	0	0	0	0	0	0	0	0	0	0	0	0		43	0.01	0	0.01	0	0	0	0.04	0	0	0	0	0.01	0	0	0.0175439	0	0.0136986
	44	0	0	0	0	0.0227273	0	0	0	0	0	0	0	0	0	0	0	0	0	0	0	0	0		44	0.01	0	0.01	0	0	0	0.04	0	0.00917431	0	0	0.01	0.015625	0.037037	0.0175439	0	0.0136986
	45	0	0	0	0	0	0	0	0	0	0	0	0	0	0	0	0	0	0	0	0	0	0		45	0.01	0	0.01	0	0	0	0	0	0.00917431	0	0	0.01	0	0	0	0	0
	46	0	0	0	0	0	0	0	0.0144928	0	0	0	0	0	0	0	0	0	0	0	0	0	0		46	0.01	0	0.01	0	0	0	0	0	0.00917431	0	0	0.01	0	0.037037	0	0	0
	47	0	0	0	0	0	0	0	0	0	0	0	0	0	0	0	0	0	0	0	0	0	0		47	0.01	0	0.01	0	0	0	0.04	0.0204082	0.0183486	0	0	0.01	0	0	0	0	0.0410959
	48	0	0	0	0	0	0	0	0	0	0	0	0	0	0	0	0	0	0	0	0	0	0		48	0.01	0	0.01	0	0	0	0	0	0	0	0	0.01	0.015625	0	0	0	0.0136986
	49	0	0	0.02	0	0.0113636	0	0	0.0144928	0	0	0	0	0	0	0	0	0	0	0	0	0	0		49	0.01	0	0.01	0	0	0	0.04	0	0	0	0.0769231	0.01	0.015625	0	0	0	0.0410959
	50	0	0	0	0	0	0	0	0	0	0	0	0	0	0	0	0	0	0	0	0	0	0		50	0.01	0	0.01	0	0	0	0	0	0	0	0	0.01	0.03125	0.0740741	0	0	0.0136986
	51	0	0	0	0	0	0	0	0	0	0	0	0	0	0	0	0	0	0	0	0.0196078	0	0		51	0.01	0	0.01	0	0	0	0.04	0	0.0183486	0	0	0.01	0	0	0.0175439	0	0.0273973
	52	0	0	0	0	0.0113636	0	0	0	0	0	0	0	0	0	0	0	0	0	0	0	0	0		52	0.01	0	0.01	0	0	0	0	0	0.0183486	0	0	0.01	0.03125	0	0.0175439	0	0
	53	0	0	0	0	0	0	0	0	0	0	0	0	0	0	0	0	0	0	0	0.0196078	0	0		53	0.01	0	0.01	0	0	0	0	0	0	0	0	0.01	0.015625	0.037037	0.0175439	0	0
	54	0	0	0	0	0	0	0	0	0.0175439	0	0	0	0	0	0	0	0	0	0	0	0	0		54	0.01	0	0.01	0	0	0	0	0	0	0	0	0.01	0	0.0740741	0	0	0.0136986
	55	0	0.0181818	0	0	0	0	0	0	0	0	0	0	0	0	0	0	0	0	0	0	0	0		55	0.01	0	0.01	0	0	0.03125	0.04	0	0.00917431	0.0454545	0.0769231	0.01	0	0	0	0	0.0136986

## Sheet: C
DATA									STATISTICS
ipisliateral 10ms light pulses (averaged from 50-100 trials)
Reliability (spikes/stim)			Latency to evoked spike (ms)			Variability (SD of Latency)			Reliability (spikes/stim)			Latency to evoked spike (ms)			Variability (SD of Latency)
Oprm1+	Oprm1-		Oprm1+	Oprm1-		Oprm1+	Oprm1-		Unpaired t test (two-tailed)			Unpaired t test (two-tailed)			Unpaired t test (two-tailed)
1	0		11.7648	none		1.95219	none		P Value	<0.0001		P Value	<0.0001		P Value	<0.0001
1	0.0625		7.04114	18.3472		0.796431	11.467		Summary	****		Summary	****		Summary	****
0.878049	0		10.998	none		2.50712	none		Significant?	Yes		Significant?	Yes		Significant?	Yes
0.85	0		14.5334	none		2.79217	none		t, df	t=7.396, df=36		t, df	t=7.241, df=27		t, df	t=7.045, df=27
2.2449	0		8.52291	none		0.579193	none
1	0.55814		9.47408	24.4926		0.774857	6.45507
1	0.2		9.39972	22.755		1.63256	10.5467
1.14	0.743902		9.48797	14.3414		0.583614	4.8571
1	0.666667		8.54248	16.9212		1.40959	3.41523
1	0.804348		5.7129	22.6717		0.640213	5.61908
1.88	0		4.13419	none		0.439781	none
2	0		5.82998	none		1.29202	none
1.16667	0		8.53009	none		0.627086	none
1	0		6.87674	none		0.865822	none
1	0.815789		8.55509	14.7074		1.1237	4.38668
1	0		10.0886	none		0.865822	none
0.98			11.5014			0.713838
1			10.0912			1.63785
0.761905			11.2285			3.63409
1			7.64379			1.17386
1			11.2996			0.972142
0.97561			15.7009			4.15243

## Sheet: E
	DATA								STATISTICS
	contralateral 10ms light pulses (averaged from 50-100 trials)
	Evoked EPSP amplitude (mV)								One-way RM ANOVA
	All Neurons								F	11.79
	Baseline	50nM	300nM						P value	0.0111
	2.14667	1.07	0.333333						Summary	*
	1.09	1	0.92						Significant?	Yes
	1.31943	1.26625	0.880435
	2.64	1.81	0.89
	1.33	1.22	0.36
	3.64	3.02	2.78
	Evoked EPSP latency (ms)								One-way RM ANOVA
	All Neurons								F	0.618
	Baseline	50nM	300nM						P value	0.5112
	28.0983	28.6244	25.9422						Summary	ns
	11.23	11.45	11.85						Significant?	No
	18.67	18.25	19.06
	10.89	10.27	11.56
	24.88	26.1	27.43
	13.37	14.6	14.9
	Evoked EPSP amplitude (norm to baseline								Two-way RM ANOVA
	Oprm1+				Oprm1+				Source of Variation	% of total variation	P value	Summary	Significant?
	Baseline	50nM	300nM		Baseline	50nM	300nM		Treatment Factor	56.43	0.0088	**	Yes
	1	1	1		1	1	1		Group Factor	1.734	0.6	ns	No
	0.498447	0.917431	0.917293		0.959695	0.685606	0.82967
	0.155279	0.844037	0.270677		0.667285	0.337121	0.763736		Bonferroni's multiple comparisons test
										Mean Diff.	95.00% CI of diff.	Significant?	Summary	Adjusted P Value
									Baseline	0
									50nM	-0.04727	-0.7933 to 0.6988	No	ns	>0.9999
									300nM	-0.166	-1.288 to 0.9560	No	ns	>0.9999
