# Supplementary material for: Dual mechanisms of opioid-induced respiratory depression in the inspiratory rhythm-generating network
Source: eLife. 2021 Aug 17;10:e67523. doi: 10.7554/eLife.67523 (PMC8390004; doi:10.7554/eLife.67523)
Supplement: Figure 6—figure supplement 1—source data 1. [file elife-67523-fig6-figsupp1-data1.xlsx]

## Sheet: C
DATA								STATISTICS
Change in Vm during photostimulation								Two-way RM ANOVA
Oprm1+				Oprm1-				Source of Variation	% of total variation	P value	Summary	Significant?
0.05mW	0.15mW	0.25mW		0.05mW	0.15mW	0.25mW		Treatment Factor	13.88	<0.0001	****	Yes
2.10666	6.32806	8.91803		0.437806	1.22322	1.43209		Group Factor	76.67	<0.0001	****	Yes
2.9051	7.37828	9.39581		-0.461842	-0.422674	0.454844
3.48159	7.69145	8.86235		-0.165171	-0.516032	-0.151157		Bonferroni's multiple comparisons test
				-0.669296	-0.812144	-0.644936		Oprm1+ vs Oprm1-	Mean Diff.	95.00% CI of diff.	Summary	Adjusted P Value
				-0.00792313	0.260727	-0.534687		0.05mW	3.004	0.8242 to 5.185	*	0.0207
								0.15mW	7.186	5.217 to 9.155	***	0.0002
								0.25mW	8.947	7.508 to 10.39	****	<0.0001
