# Supplementary material for: Dual mechanisms of opioid-induced respiratory depression in the inspiratory rhythm-generating network
Source: eLife. 2021 Aug 17;10:e67523. doi: 10.7554/eLife.67523 (PMC8390004; doi:10.7554/eLife.67523)
Supplement: Figure 6—figure supplement 2—source data 1. [file elife-67523-fig6-figsupp2-data1.xlsx]

## Sheet: B
DATA								STATISTICS
IBI spiking (norm to baseline)					Delta IBI spiking			Paired two-tailed t test
OFF		ON						P value	0.0012
Baseline	DAMGO	Baseline	DAMGO		Baseline	DAMGO		P value summary	**
1	0.834612	1.61614	0.959048		0.616136	0.124436		Significant?	Yes
1	0.510386	1.34983	0.564475		0.349833	0.054089		t, df	t=4.476, df=10
1	0.270296	1.22321	0.28459		0.223208	0.014294
1	0.606381	1.21459	0.686042		0.214593	0.079661
1	0.657531	1.59222	0.682525		0.592219	0.024994
1	0.853743	1.31024	0.852521		0.310242	-0.00122
1	0.65082	1.41228	0.713392		0.412276	0.062572
1	0.828507	1.09853	0.937181		0.098532	0.108674
1	0.623957	1.05164	0.562396		0.051637	-0.06156
1	0.70731	1.18494	0.790304		0.184938	0.082994
1	0.468312	1.10499	0.477582		0.104986	0.00927

## Sheet: C
DATA								STATISTICS
burst frequency (norm to baseline)					Delta Frequency			Paired two-tailed t test
OFF		ON						P value	0.0019
Baseline	DAMGO	Baseline	DAMGO		Baseline	DAMGO		P value summary	**
1	0.7839	2.88366	1.50774		1.88366	0.723842		Significant?	Yes
1	0	3.16213	0.552734		2.16213	0.552734		t, df	t=4.186, df=10
1	0	2.52149	0.328919		1.52149	0.328919
1	0.411118	2.11078	1.17021		1.11078	0.759089
1	0.234834	2.57143	1.28571		1.57143	1.05088
1	0.285266	1.71155	1.00893		0.711551	0.723661
1	0	1.52684	0.375489		0.526839	0.375489
1	0.404242	1.819	0.70941		0.819	0.305168
1	0.220833	1.19255	0.26501		0.192546	0.044177
1	1.15367	2.99954	1.69359		1.99954	0.539917
1	0.117543	1.82386	0.235439		0.823862	0.117896
