# Supplementary material for: Dual mechanisms of opioid-induced respiratory depression in the inspiratory rhythm-generating network
Source: eLife. 2021 Aug 17;10:e67523. doi: 10.7554/eLife.67523 (PMC8390004; doi:10.7554/eLife.67523)
Supplement: Figure 6—figure supplement 3—source data 1. [file elife-67523-fig6-figsupp3-data1.xlsx]

## Sheet: B
DATA				STATISTICS
Freqeuncy (norm to baseline)				One-way RM ANOVA
OFF	473nm	598nm		F	P value	P value summary	Statistically significant (P < 0.05)?
1	0.967533	0.961855		0.5086	0.5401	ns	No
1	1.06625	1.01548
1	1.08235	0.976981
1	0.967458	0.932458		Bonferroni's multiple comparisons test
1	1.12688	0.912568			Mean Diff.	95.00% CI of diff.	Summary	Adjusted P Value
1	0.975869	1.34587		Baseline vs. 473nm	-0.05746	-0.1634 to 0.04845	ns	0.3168
1	1.21589	0.992459		Baseline vs. 598nm	-0.01967	-0.1857 to 0.1464	ns	>0.9999

## Sheet: D
DATA				STATISTICS
Freqeuncy (norm to baseline)				One-way RM ANOVA
OFF	473nm	598nm		F	P value	P value summary	Statistically significant (P < 0.05)?
1	0.991078	0.978777		0.6885	0.4553	ns	No
1	1.05735	0.891359
1	0.969181	0.995989
1	0.966211	0.98641		Bonferroni's multiple comparisons test
1	0.938598	0.839861			Mean Diff.	95.00% CI of diff.	Summary	Adjusted P Value
1	1.00004	0.970359		Baseline vs. 473nm	0.008287	-0.01834 to 0.03492	ns	0.8501
1	0.995831	0.974923		Baseline vs. 598nm	0.02423	-0.04071 to 0.08918	ns	0.6851
1	0.997209	1.13697
1	0.988935	0.993956
1	1.0127	0.989066
