# Supplementary material for: Dual mechanisms of opioid-induced respiratory depression in the inspiratory rhythm-generating network
Source: eLife. 2021 Aug 17;10:e67523. doi: 10.7554/eLife.67523 (PMC8390004; doi:10.7554/eLife.67523)
Supplement: Figure 6—source data 1. [file elife-67523-fig6-data1.xlsx]

## Sheet: C
	DATA															STATISTICS
	Optogenetic activation of Oprm1 neurons in vitro (n=13)
	IBI Spiking (norm to baseline)
	Baseline	0.05mW	0.15mW	0.25mW		50nM	100nM	200nM	300nM		DAMGO Baseline	2mW	4mW	6mW		One-way RM ANOVA						One-way RM ANOVA						One-way RM ANOVA
	1	1.46106	2.07328	2.07846		1.57988	1.48602	1.4305	1.51768		1.35559	1.91481	2.23406	2.78485		Source of Variation	P value	Summary	Significant?	F (DFn, DFd)		Source of Variation	P value	Summary	Significant?	F (DFn, DFd)		Source of Variation	P value	Summary	Significant?	F (DFn, DFd)
	1	1.28641	2.8015	3.17156		0.710935	0.686199	0.518492	0.351068		0.408084	0.448744	1.05312	1.52631		Treatment	<0.0001	****	Yes	F (1.193, 14.31) = 41.88		Treatment	0.0009	***	Yes	F (2.069, 24.83) = 9.317		Treatment	<0.0001	****	Yes	F (1.460, 17.51) = 57.48
	1	1.27783	1.59723	1.74036		0.880567	0.865726	0.86684	0.861781		0.806357	0.961909	1.35622	1.52122
	1	1.20728	1.51893	1.52332		0.968759	0.949139	0.901269	0.916605		0.880154	1.04021	1.33603	1.46317
	1	1.51293	1.92115	2.08985		0.91854	0.921092	0.900525	0.901865		0.823136	1.00405	1.51893	1.69364		Bonferroni's multiple comparisons test						Bonferroni's multiple comparisons test						Bonferroni's multiple comparisons test
	1	1.38645	1.73285	1.90071		0.736824	0.736512	0.696404	0.687827		0.690423	0.887382	1.62353	1.88813			Mean Diff.	95.00% CI of diff.	Summary	P Value			Mean Diff.	95.00% CI of diff.	Summary	P Value			Mean Diff.	95.00% CI of diff.	Summary	P Value
	1	1.70824	2.05648	2.12701		1.06333	1.19062	0.927117	0.878716		1.32824	2.08144	2.59079	2.89826		baseline vs. 0.05mW	-0.3545	-0.4765 to -0.2325	****	<0.0001		baseline vs. 50nM	0.06441	-0.01758 to 0.1464	ns	0.1592		baseline vs. 0.05mW	-0.2856	-0.4609 to -0.1104	**	0.0021
	1	1.11536	1.2065	1.25786		0.946446	1.00202	0.924901	0.935299		0.941658	0.927301	1.13105	1.22599		baseline vs. 0.15mW	-0.8122	-1.116 to -0.5083	****	<0.0001		baseline vs. 100nM	0.07149	-0.04594 to 0.1889	ns	0.3972		baseline vs. 0.15mW	-0.6864	-0.9140 to -0.4588	****	<0.0001
	1	1.33633	1.69246	1.88754		0.956483	0.93919	0.906874	0.934263		0.878279	1.21344	1.42574	1.4181		baseline vs. 0.25mW	-0.9445	-1.299 to -0.5900	****	<0.0001		baseline vs. 200nM	0.1368	0.03490 to 0.2386	**	0.0079		baseline vs. 0.25mW	-0.8902	-1.201 to -0.5796	****	<0.0001
	1	1.27871	1.62727	1.77707		0.970163	0.930307	0.882837	0.883984		0.858078	1.15384	1.43761	1.58101								baseline vs. 300nM	0.1494	0.03625 to 0.2625	**	0.0088
	1	1.25042	1.57049	1.8501		1.03338	1.04168	1.01678	0.971778		0.924144	1.16239	1.48262	1.55211
	1	1.27394	1.63061	1.60087		0.917335	0.900402	0.860663	0.838571		0.802387	0.994266	1.28782	1.35486
	1	1.51346	2.13012	2.27408		0.947312	0.888939	0.856287	0.845652		0.769835	1.39	1.9123	2.13088
	Burst Frequency (norm to baseline)
	Baseline	0.05mW	0.15mW	0.25mW		50nM	100nM	200nM	300nM		DAMGO Baseline	2mW	4mW	6mW		One-way RM ANOVA						One-way RM ANOVA						One-way RM ANOVA
	1	1.67308	1.96154	2.13462		0.894231	0.663462	0.375	0.144231		0.269231	0.461538	0.634615	0.75		Source of Variation	P value	Summary	Significant?	F (DFn, DFd)		Source of Variation	P value	Summary	Significant?	F (DFn, DFd)		Source of Variation	P value	Summary	Significant?	F (DFn, DFd)
	1	1.66667	2.11111	2.44444		1.05556	0.944444	0.833333	0.666667		0.555556	0.888889	1.16667	1.33333		Treatment	<0.0001	****	Yes	F (1.238, 14.85) = 63.06		Treatment	<0.0001	****	Yes	F (1.455, 17.46) = 55.27		Treatment	<0.0001	****	Yes	F (1.468, 17.61) = 75.97
	1	1.37143	1.71429	2.05714		0.657143	0.371429	0.2	0.2		0.102857	0.228571	0.514286	0.557143
	1	1.28571	1.53061	1.77551		0.979592	0.94898	0.918367	0.795918		0.642857	0.857143	1.22449	1.28571
	1	1.63636	2.18182	2.72727		0.818182	0.424242	0.212121	0		0.036364	0.272727	0.454545	0.363636		Bonferroni's multiple comparisons test						Bonferroni's multiple comparisons test						Bonferroni's multiple comparisons test
	1	1.8	2.6	3		0.7	0.633333	0.566667	0.533333		0.38	0.666667	1.25	1.53333			Mean Diff.	95.00% CI of diff.	Summary	P Value			Mean Diff.	95.00% CI of diff.	Summary	P Value			Mean Diff.	95.00% CI of diff.	Summary	P Value
	1	1.62857	2.4	3		0.857143	0.8	0.571429	0.342857		0.438095	0.742857	0.971429	1.02857		baseline vs. 0.05mW	-0.5256	-0.7026 to -0.3487	****	<0.0001		baseline vs. 50nM	0.19	0.1022 to 0.2779	***	0.0001		baseline vs. 0.05mW	-0.2546	-0.3433 to -0.1659	****	<0.0001
	1	1.48673	1.51327	1.69911		0.584071	0.504425	0.292035	0.106195		0.265487	0.318584	0.637168	0.743363		baseline vs. 0.15mW	-0.9878	-1.301 to -0.6746	****	<0.0001		baseline vs. 100nM	0.3455	0.1754 to 0.5157	***	0.0003		baseline vs. 0.15mW	-0.521	-0.6553 to -0.3866	****	<0.0001
	1	1.41176	2.29412	3		0.823529	0.647059	0.470588	0.411765		0.529412	0.705882	0.941176	0.941176		baseline vs. 0.25mW	-1.311	-1.738 to -0.8830	****	<0.0001		baseline vs. 200nM	0.5092	0.3020 to 0.7164	****	<0.0001		baseline vs. 0.25mW	-0.598	-0.7722 to -0.4238	****	<0.0001
	1	1.36585	1.70732	1.99187		0.939024	0.910569	0.739837	0.426829		0.448171	0.768293	0.96748	1.02439								baseline vs. 300nM	0.6438	0.4273 to 0.8603	****	<0.0001
	1	1.875	2.4375	2.71875		0.78125	0.46875	0.25	0.28125		0.241071	0.65625	0.9375	1
	1	1.03226	1.29032	1.29032		0.83871	0.623656	0.516129	0.387097		0.331797	0.516129	0.580645	0.688172
	1	1.6	2.1	2.2		0.8	0.766667	0.633333	0.533333		0.333333	0.8	1.06667	1.1
	Ratio: Burst Frequency / IBI spiking Ratio (norm to baseline)
	Baseline	0.05mW	0.15mW	0.25mW		50nM	100nM	200nM	300nM		DAMGO Baseline	2mW	4mW	6mW		One-way RM ANOVA						One-way RM ANOVA						One-way RM ANOVA
	1	1.14511	0.946103	1.02702		0.566012	0.446467	0.262147	0.095034		0.198608	0.241036	0.284063	0.269314		Source of Variation	P value	Summary	Significant?	F (DFn, DFd)		Source of Variation	P value	Summary	Significant?	F (DFn, DFd)		Source of Variation	P value	Summary	Significant?	F (DFn, DFd)
	1	1.2956	0.753565	0.770739		1.48474	1.37634	1.60722	1.89897		1.36138	1.98084	1.10782	0.873568		Treatment	0.0382	*	Yes	F (1.689, 20.27) = 4.082		Treatment	0.0003	***	Yes	F (1.361, 16.33) = 17.38		Treatment	0.1124	ns	No	F (1.190, 14.28) = 2.791
	1	1.07325	1.07329	1.18202		0.746272	0.429037	0.230723	0.232078		0.127558	0.237623	0.379206	0.366248
	1	1.06497	1.00769	1.16555		1.01118	0.999832	1.01897	0.868333		0.730392	0.824006	0.916514	0.878718
	1	1.08158	1.13568	1.30501		0.890741	0.460587	0.235553	0		0.044177	0.271627	0.299254	0.214708		Bonferroni's multiple comparisons test						Bonferroni's multiple comparisons test						Bonferroni's multiple comparisons test
	1	1.29828	1.50042	1.57835		0.950023	0.859909	0.813704	0.775389		0.550388	0.751273	0.769927	0.812091			Mean Diff.	95.00% CI of diff.	Summary	P Value			Mean Diff.	95.00% CI of diff.	Summary	P Value			Mean Diff.	95.00% CI of diff.	Summary	P Value
	1	0.95336	1.16704	1.41043		0.806095	0.671919	0.61635	0.39018		0.329831	0.356895	0.374954	0.354893		baseline vs. 0.05mW	-0.1336	-0.2728 to 0.005609	ns	0.0615		baseline vs. 50nM	0.1295	0.02605 to 0.2329	*	0.0127		baseline vs. 0.05mW	-0.1582	-0.2846 to -0.03188	*	0.0136
	1	1.33296	1.25427	1.35079		0.61712	0.503409	0.315748	0.113541		0.281935	0.343561	0.563344	0.606334		baseline vs. 0.15mW	-0.1209	-0.3094 to 0.06760	ns	0.2997		baseline vs. 100nM	0.283	0.1069 to 0.4591	**	0.002		baseline vs. 0.15mW	-0.1394	-0.2597 to -0.01911	*	0.022
	1	1.05645	1.3555	1.58937		0.860997	0.688954	0.518912	0.440738		0.602783	0.581718	0.660132	0.663687		baseline vs. 0.25mW	-0.211	-0.4192 to -0.002828	*	0.0466		baseline vs. 200nM	0.3889	0.1332 to 0.6447	**	0.0031		baseline vs. 0.25mW	-0.1153	-0.2781 to 0.04742	ns	0.2172
	1	1.06815	1.04919	1.12087		0.967904	0.978784	0.838022	0.482847		0.522296	0.665858	0.672976	0.647936								baseline vs. 300nM	0.4938	0.1661 to 0.8216	**	0.0033
	1	1.49949	1.55206	1.46951		0.756013	0.449993	0.245875	0.289418		0.260859	0.564569	0.632328	0.644286
	1	0.810291	0.791313	0.806011		0.914289	0.692642	0.599687	0.461615		0.413513	0.519106	0.450875	0.507927
	1	1.05718	0.985861	0.967424		0.844495	0.862452	0.739628	0.630677		0.432993	0.575542	0.557793	0.516218

## Sheet: D
	DATA										STATISTICS
	Optogenetic activation of Oprm1 neurons in vitro (n=13)
	IBI Spiking (norm to baseline)
	BASELINE					DAMGO					Two-way RM ANOVA
	Off	0.05mW	0.15mW	0.25mW		OFF	0.05mW	0.15mW	0.25mW		Source of Variation	% of total variation	P value	Summary	Significant?
	1	1.46106	2.07328	2.07846		1.35559	1.91481	2.23406	2.78485		Treatment Factor	48.77	<0.0001	****	Yes
	1	1.28641	2.8015	3.17156		0.408084	0.448744	1.05312	1.52631		Group Factor	3.054	0.1649	ns	No
	1	1.27783	1.59723	1.74036		0.806357	0.961909	1.35622	1.52122
	1	1.20728	1.51893	1.52332		0.880154	1.04021	1.33603	1.46317		Bonferroni's multiple comparisons test
	1	1.51293	1.92115	2.08985		0.823136	1.00405	1.51893	1.69364			Mean Diff.	95.00% CI of diff.	Significant?	Summary	Adjusted P Value
	1	1.38645	1.73285	1.90071		0.690423	0.887382	1.62353	1.88813		OFF	0.118	-0.08121 to 0.3172	No	ns	0.4311
	1	1.70824	2.05648	2.12701		1.32824	2.08144	2.59079	2.89826		0.05mW	0.1868	-0.1727 to 0.5463	No	ns	0.6462
	1	1.11536	1.2065	1.25786		0.941658	0.927301	1.13105	1.22599		0.15mW	0.2438	-0.1974 to 0.6849	No	ns	0.5939
	1	1.33633	1.69246	1.88754		0.878279	1.21344	1.42574	1.4181		0.25mW	0.1723	-0.3527 to 0.6974	No	ns	>0.9999
	1	1.27871	1.62727	1.77707		0.858078	1.15384	1.43761	1.58101
	1	1.25042	1.57049	1.8501		0.924144	1.16239	1.48262	1.55211
	1	1.27394	1.63061	1.60087		0.802387	0.994266	1.28782	1.35486
	1	1.51346	2.13012	2.27408		0.769835	1.39	1.9123	2.13088
	Burst Frequency (norm to baseline)
	BASELINE					DAMGO					Two-way RM ANOVA
	Off	0.05mW	0.15mW	0.25mW		OFF	0.05mW	0.15mW	0.25mW		Source of Variation	% of total variation	P value	Summary	Significant?
	1	1.67308	1.96154	2.13462		0.269231	0.461538	0.634615	0.75		Treatment Factor	26.73	<0.0001	****	Yes
	1	1.66667	2.11111	2.44444		0.555556	0.888889	1.16667	1.33333		Group Factor	51.46	<0.0001	****	Yes
	1	1.37143	1.71429	2.05714		0.102857	0.228571	0.514286	0.557143
	1	1.28571	1.53061	1.77551		0.642857	0.857143	1.22449	1.28571		Bonferroni's multiple comparisons test
	1	1.63636	2.18182	2.72727		0.036364	0.272727	0.454545	0.363636			Mean Diff.	95.00% CI of diff.	Significant?	Summary	Adjusted P Value
	1	1.8	2.6	3		0.38	0.666667	1.25	1.53333		OFF	0.6481	0.5064 to 0.7899	Yes	****	<0.0001
	1	1.62857	2.4	3		0.438095	0.742857	0.971429	1.02857		0.05mW	0.9192	0.6786 to 1.160	Yes	****	<0.0001
	1	1.48673	1.51327	1.69911		0.265487	0.318584	0.637168	0.743363		0.15mW	1.115	0.7429 to 1.487	Yes	****	<0.0001
	1	1.41176	2.29412	3		0.529412	0.705882	0.941176	0.941176		0.25mW	1.361	0.8691 to 1.852	Yes	****	<0.0001
	1	1.36585	1.70732	1.99187		0.448171	0.768293	0.96748	1.02439
	1	1.875	2.4375	2.71875		0.241071	0.65625	0.9375	1
	1	1.03226	1.29032	1.29032		0.331797	0.516129	0.580645	0.688172
	1	1.6	2.1	2.2		0.333333	0.8	1.06667	1.1
	Ratio: Burst Frequency / IBI spiking Ratio (norm to baseline)
	BASELINE					DAMGO					Two-way RM ANOVA
	Off	0.05mW	0.15mW	0.25mW		OFF	0.05mW	0.15mW	0.25mW		Source of Variation	% of total variation	P value	Summary	Significant?
	1	1.14511	0.946103	1.02702		0.198608	0.241036	0.284063	0.269314		Treatment Factor	2.728	0.0097	**	Yes
	1	1.2956	0.753565	0.770739		1.36138	1.98084	1.10782	0.873568		Group Factor	51.95	<0.0001	****	Yes
	1	1.07325	1.07329	1.18202		0.127558	0.237623	0.379206	0.366248
	1	1.06497	1.00769	1.16555		0.730392	0.824006	0.916514	0.878718		Bonferroni's multiple comparisons test
	1	1.08158	1.13568	1.30501		0.044177	0.271627	0.299254	0.214708			Mean Diff.	95.00% CI of diff.	Significant?	Summary	Adjusted P Value
	1	1.29828	1.50042	1.57835		0.550388	0.751273	0.769927	0.812091		OFF	0.5495	0.2755 to 0.8235	Yes	***	0.0003
	1	0.95336	1.16704	1.41043		0.329831	0.356895	0.374954	0.354893		0.05mW	0.5248	0.1419 to 0.9078	Yes	**	0.0057
	1	1.33296	1.25427	1.35079		0.281935	0.343561	0.563344	0.606334		0.15mW	0.531	0.2726 to 0.7894	Yes	****	<0.0001
	1	1.05645	1.3555	1.58937		0.602783	0.581718	0.660132	0.663687		0.25mW	0.6452	0.3836 to 0.9067	Yes	****	<0.0001
	1	1.06815	1.04919	1.12087		0.522296	0.665858	0.672976	0.647936
	1	1.49949	1.55206	1.46951		0.260859	0.564569	0.632328	0.644286
	1	0.810291	0.791313	0.806011		0.413513	0.519106	0.450875	0.507927
	1	1.05718	0.985861	0.967424		0.432993	0.575542	0.557793	0.516218

## Sheet: E
	DATA				STATISTICS
	Slope of light response at Baseline vs Morphine in vitro (n=13)
	IBI Spiking (norm to baseline)				IBI Spiking (norm to baseline)
	Baseline	Morphine			unpaired t test (two-tailed)
	1.539	1.843			P value	0.5753
	3.212	1.584			Summary	ns
	1.016	1.016			Significant?	No
	0.7526	0.8179			t, df	t=0.5759, df=12
	1.471	1.251
	1.219	1.732
	1.492	2.088
	0.3459	0.4227
	1.208	0.7327
	1.072	0.981
	1.148	0.8816
	0.8637	0.7804
	1.776	1.842
	Burst Frequency (norm to baseline)				Burst Frequency (norm to baseline)
	Baseline	Morphine			unpaired t test (two-tailed)
	0.4267	0.1867			P value	0.0004
	0.2867	0.1567			Summary	***
	0.41	0.1923			Significant?	Yes
	0.28	0.25			t, df	t=4.821, df=12
	0.63	0.128
	0.68	0.4043
	0.79	0.2333
	0.2667	0.22
	0.39	0.08333
	0.3886	0.2258
	0.61	0.2729
	0.175	0.1757
	0.41	0.2567

## Sheet: J
	DATA										STATISTICS
	Optogenetic activation of Oprm1 neurons in vivo (n=7)
	Baseline					Morphine					Two-way RM ANOVA
	OFF	0.05mW	0.15mW	0.25mW		OFF	0.05mW	0.15mW	0.25mW		Source of Variation	% of total variation	P value	Summary	Significant?
	1	1.48729	1.62712	1.83051		0.305085	0.813559	0.762712	0.254237		Treatment Factor	11.76	<0.0001	****	Yes
	1	1.32237	1.42105	1.42105		0.423684	0.75	0.781579	0.710526		Group Factor	51.63	0.0003	***	Yes
	1	1.13415	1.35366	1.39024		0.768293	0.878049	0.878049	0.878049
	1	1.00948	1.35071	1.35071		0.687204	0.924171	0.853081	0.888626		Bonferroni's multiple comparisons test
	1	1	1.10714	1.26667		0.496154	0.519231	0.657692	0.692308		Baseline vs DAMGO	Mean Diff.	95.00% CI of diff.	Summary	Adjusted P Value
	1	1.0625	1.19565	1.35417		0.935714	0.964286	1.02857	1.09286		OFF	0.3589	0.04247 to 0.6754	*	0.0287
	1	0.988024	1.00599	1.13174		0.871257	0.826347	0.916168	0.943114		0.25 mW	0.3326	0.06187 to 0.6033	*	0.0148
											0.5 mW	0.4548	0.1758 to 0.7337	**	0.0025
											0.75 mW	0.6122	0.2263 to 0.9981	**	0.0024

## Sheet: K
	DATA				STATISTICS
	Slope of light response at Baseline vs Morphine in vitro (n=7)
	IBI Spiking (norm to baseline)				IBI Spiking (norm to baseline)
	Baseline	Morphine			unpaired t test (two-tailed)
	1.053	-0.08136			P value	0.0455
	0.5447	0.3568			Summary	*
	0.5561	0.1317			Significant?	Yes
	0.5573	0.2133			t, df	t=2.516, df=6
	0.3629	0.2908
	0.4783	0.2143
	0.1653	0.1222
