# Supplementary figures and images for: Dual mechanisms of opioid-induced respiratory depression in the inspiratory rhythm-generating network
Source: eLife journal article supplement (doi:10.7554/elife.67523), 2021-08-17

# Single Units (CNQX + CPP)

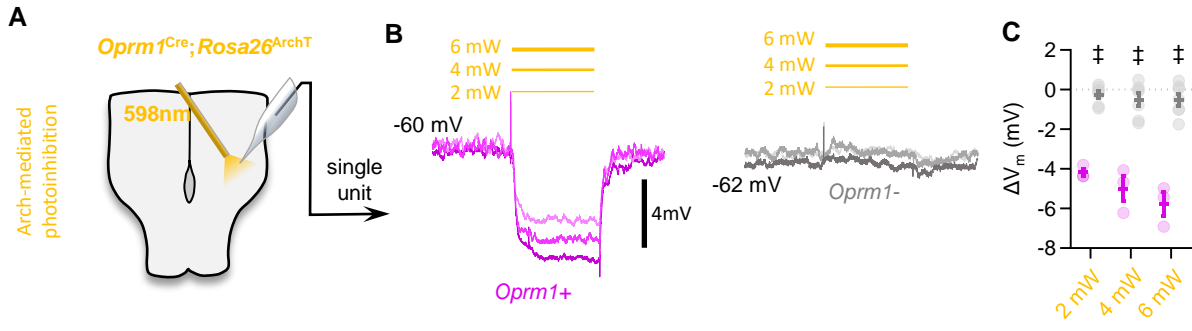

Supplement: supp [file elife-67523-supp-v1.zip]

[DAMGO]

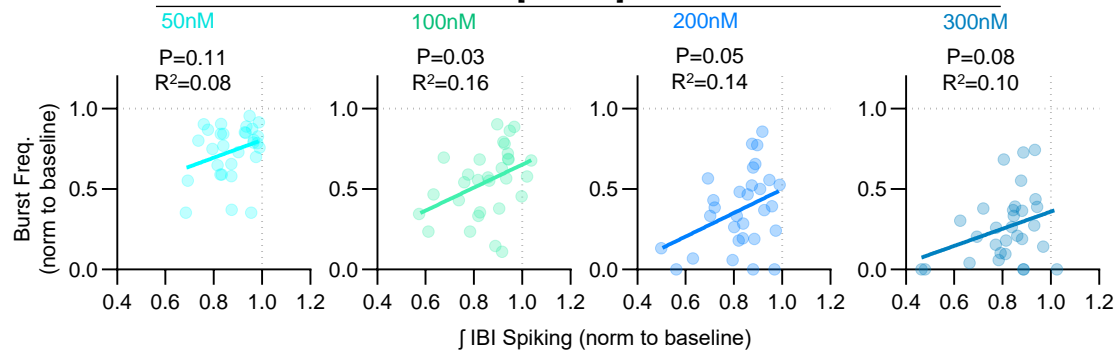

Supplement: supp [file elife-67523-supp-v1.zip]

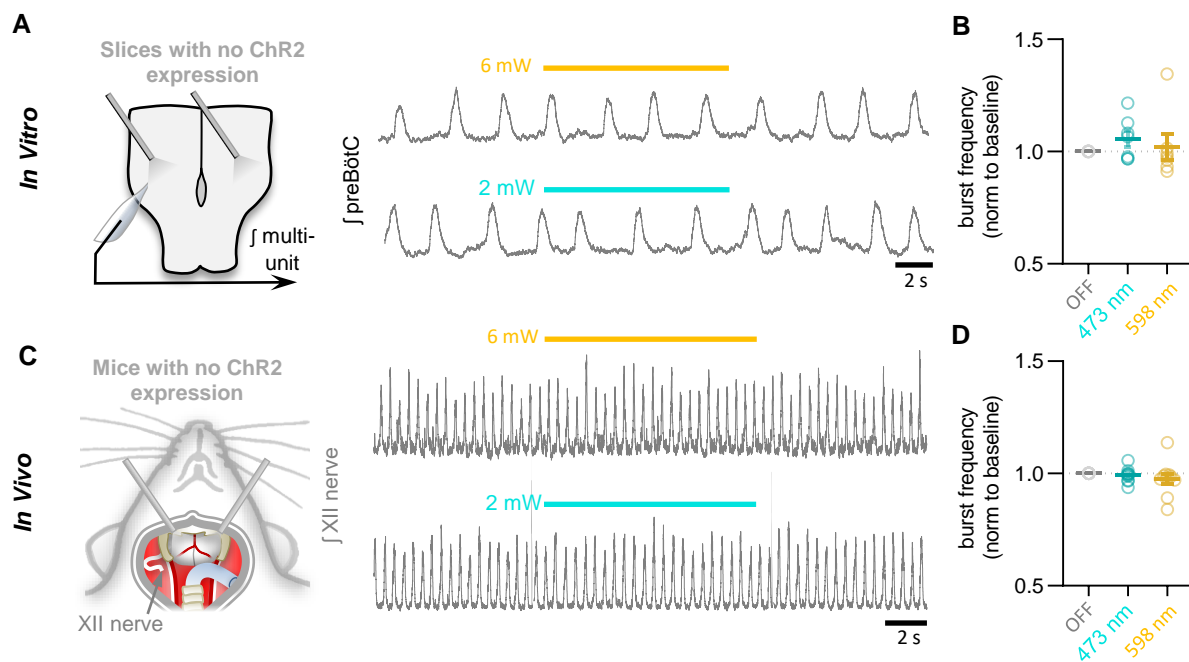

Supplement: supp [file elife-67523-supp-v1.zip]

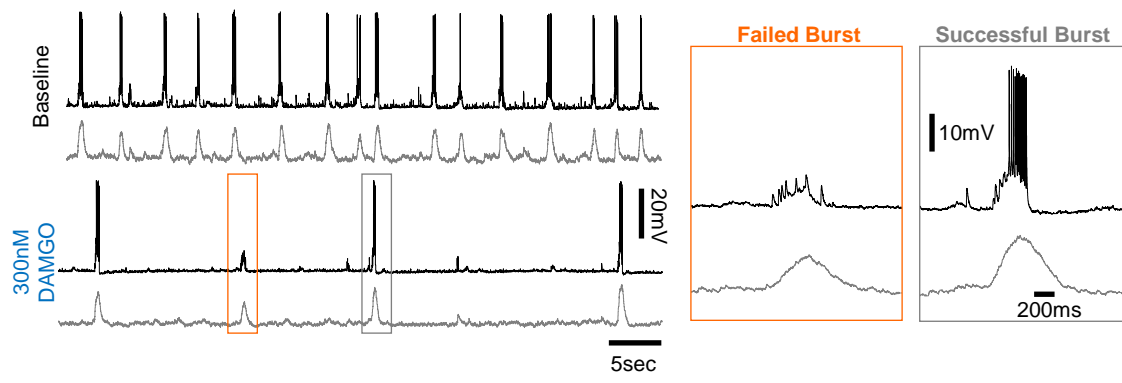

Supplement: supp [file elife-67523-supp-v1.zip]

ISH for *Oprm1*

Sagittal View

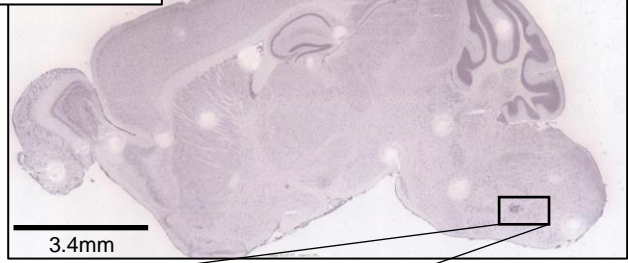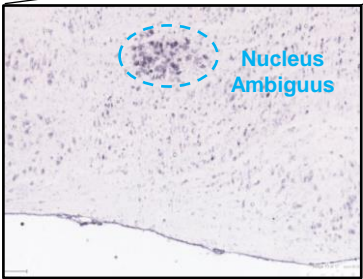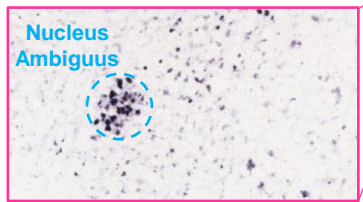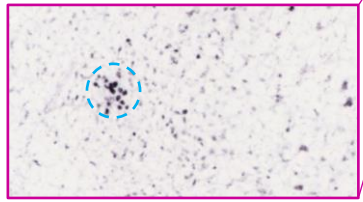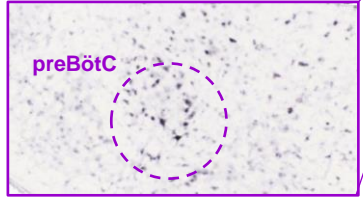

Transverse View

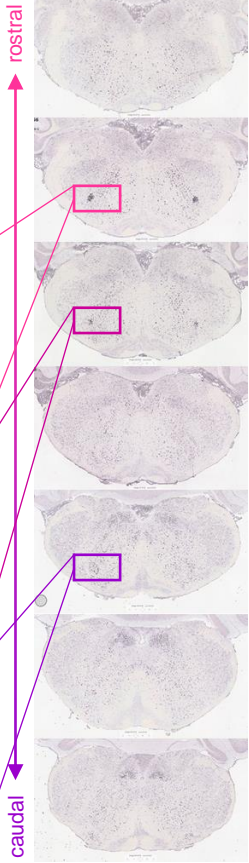

0.42mm

2.1mm

Supplement: supp [file elife-67523-supp-v1.zip]

**A**ChR2-mediated  
photostimulation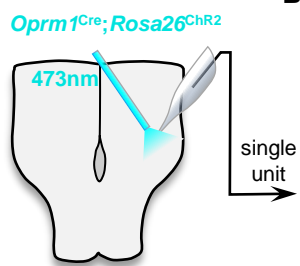**B**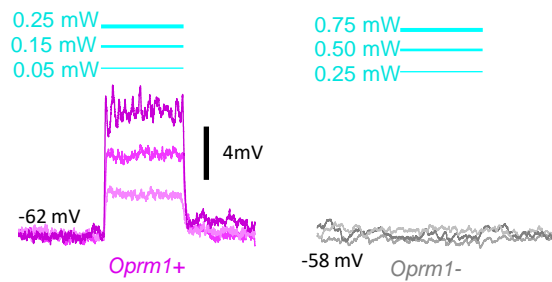**C**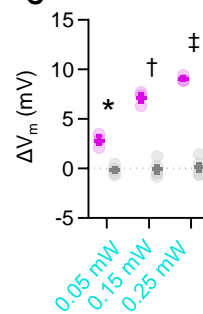

Supplement: supp [file elife-67523-supp-v1.zip]

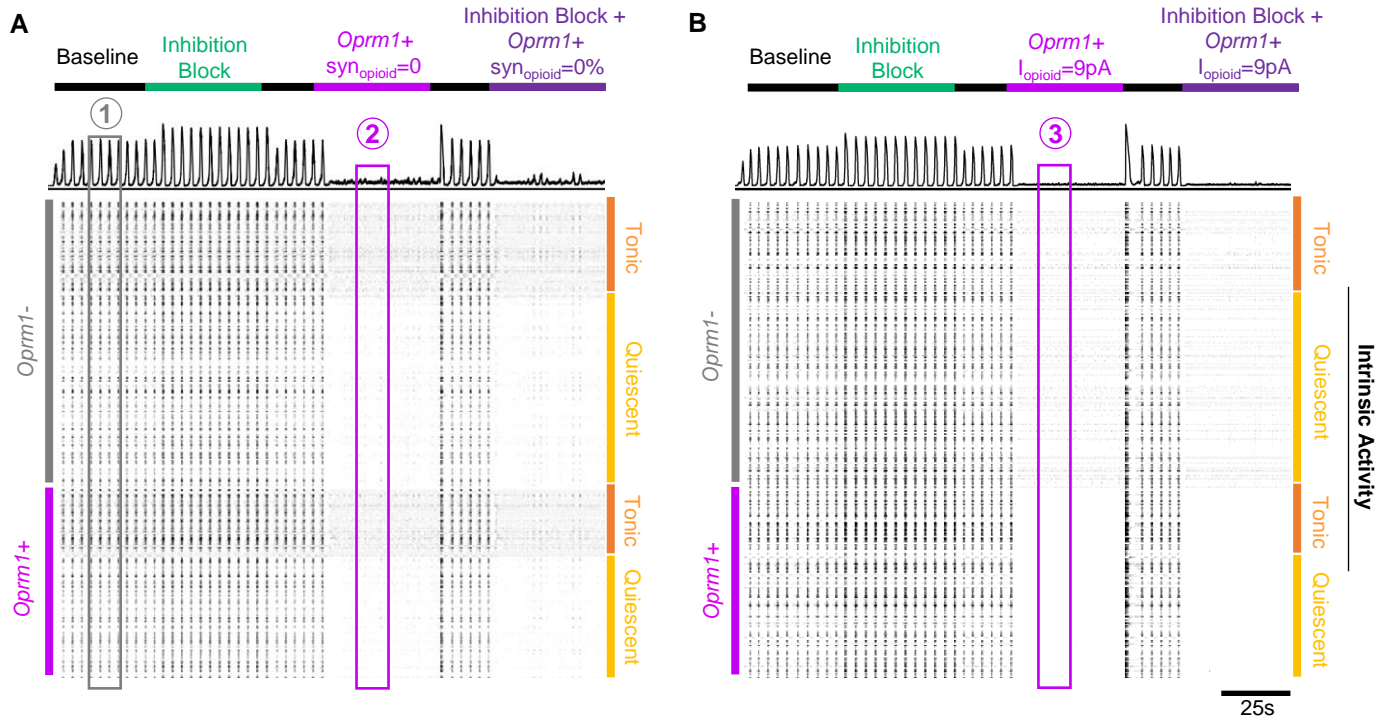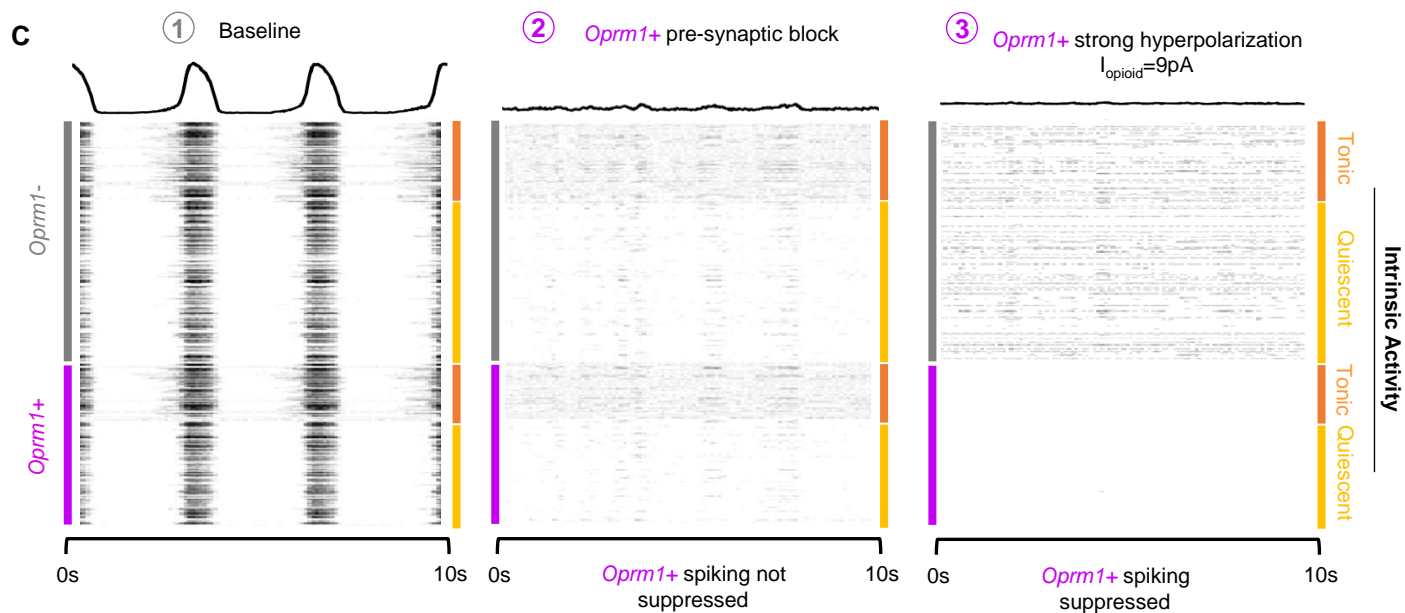

Supplement: supp [file elife-67523-supp-v1.zip]

**A****Contralateral Stim**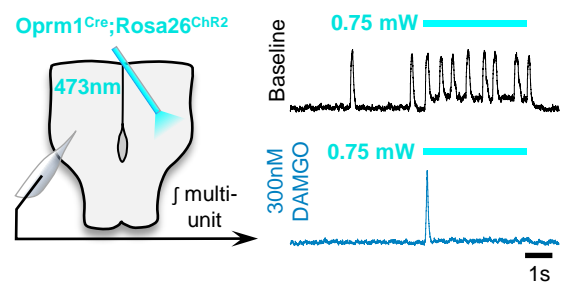**B** **$\int$  IBI Spiking**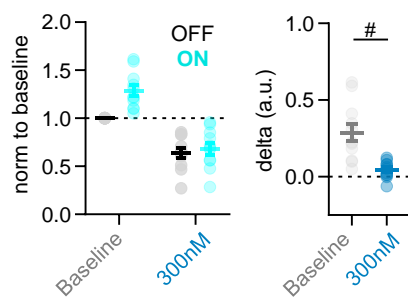**C****Burst Frequency**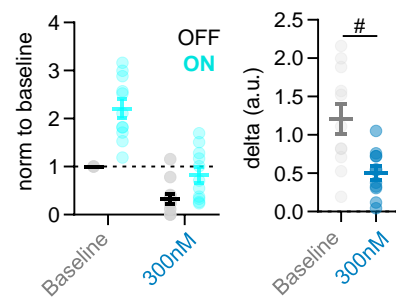

Supplement: supp [file elife-67523-supp-v1.zip]

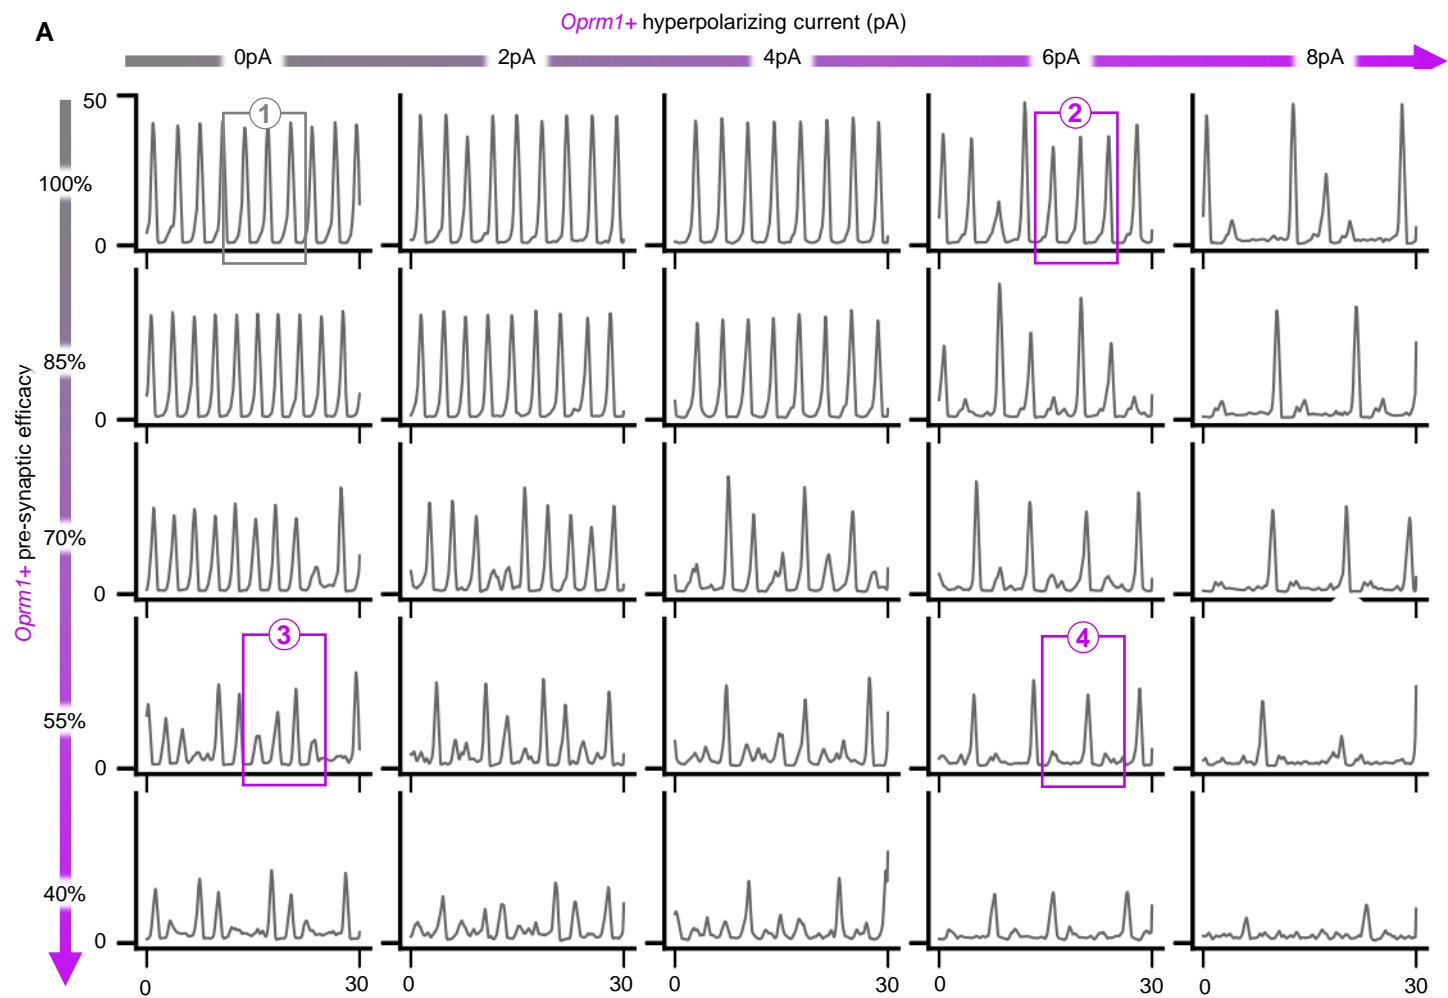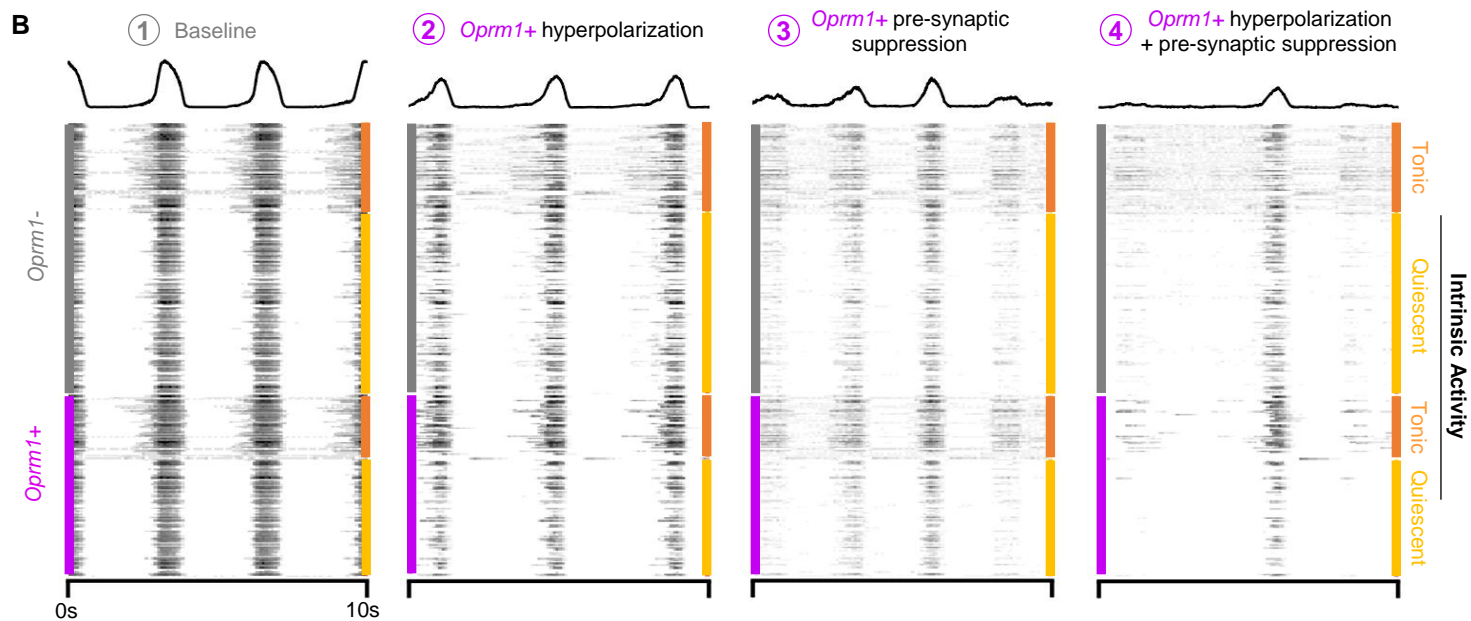

Supplement: supp [file elife-67523-supp-v1.zip]

**A**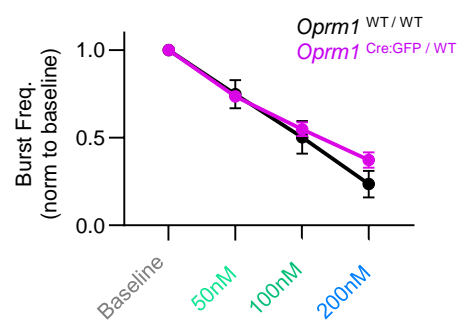**B**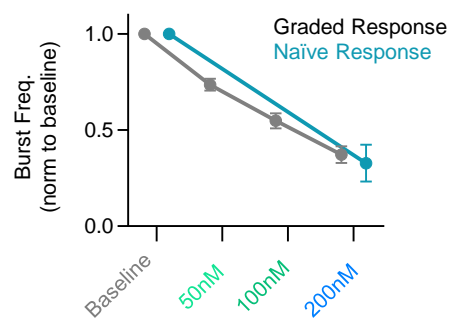

Supplement: supp [file elife-67523-supp-v1.zip]
